# Supplementary material for: Over-Expression of Either MECP2_e1 or MECP2_e2 in Neuronally Differentiated Cells Results in Different Patterns of Gene Expression
Source: PLoS One. 2014 Apr 3;9(4):e91742. doi: 10.1371/journal.pone.0091742 (PMC3974668; doi:10.1371/journal.pone.0091742)
Supplement: Table S1 — Uncorrected one way ANOVA (p<0.05) results of gene expression microarray on neuronally differentiated SK-N-SH cells infected with MECP2_e1, MECP2_e2 or eGFP lentiviral vectors. (XLSX) [file pone.0091742.s004.xlsx]

## Sheet: human-noINS_ANOVAuncorpt01_filt
# Notes : Created from Advanced Analysis operation: significance Analysis.
#Entitylist : Filtered on Expression (20.0 - 100.0)th Percentile in the Raw Data
#Interpretation : Group
#Experiment: Copy of 100603_Human - SKNSKH-MECP2_e1 vs. e2 vs. eGFP
#corrected p-value cut-off:0.01
#Post-hoc test: tukeyHSD
#Selected Test : Oneway ANOVA
#p-value computation: Asymptotic
#Multiple Testing Correction: No Correction
#
# Technology : Agilent.TwoColor.14850
# Owner : gxuser
# Created On : Thu Feb 28 11:33:35 EST 2013
ProbeName	p	FC ([MECP2_e2] vs [MECP2_e1])	Log FC ([MECP2_e2] vs [MECP2_e1])	FC (abs) ([MECP2_e2] vs [MECP2_e1])	Regulation ([MECP2_e2] vs [MECP2_e1])	FC ([MECP2_e2] vs [eGFP])	Log FC ([MECP2_e2] vs [eGFP])	FC (abs) ([MECP2_e2] vs [eGFP])	Regulation ([MECP2_e2] vs [eGFP])	FC ([MECP2_e1] vs [eGFP])	Log FC ([MECP2_e1] vs [eGFP])	FC (abs) ([MECP2_e1] vs [eGFP])	Regulation ([MECP2_e1] vs [eGFP])	[SKNSH MECP2_e2 replicate1](raw)	[SKNSH MECP2_e2 replicate2](raw)	[SKNSH MECP2_e2 replicate3](raw)	[SKNSH MECP2_e1 replicate1](raw)	[SKNSH MECP2_e1 replicate2](raw)	[SKNSH MECP2_e1 replicate3](raw)	[SKNSH eGFP replicate1](raw)	[SKNSH eGFP replicate2](raw)	[SKNSH eGFP replicate3](raw)	[SKNSH MECP2_e2 replicate1](normalized)	[SKNSH MECP2_e2 replicate2](normalized)	[SKNSH MECP2_e2 replicate3](normalized)	[SKNSH MECP2_e1 replicate1](normalized)	[SKNSH MECP2_e1 replicate2](normalized)	[SKNSH MECP2_e1 replicate3](normalized)	[SKNSH eGFP replicate1](normalized)	[SKNSH eGFP replicate2](normalized)	[SKNSH eGFP replicate3](normalized)	GeneSymbol	Description	Chromosome End Index_Avadis_	Chromosome Number_Avadis_	Chromosome Start Index_Avadis_	Chromosome Strand_Avadis_	ControlType	Cytoband	EntrezGeneID	GenbankAccession	GeneName	GenomicCoordinates	Go	RefSeqAccession	UniGeneID
A_23_P212522	0.00707179	1.02057	0.029373	1.02057	up	-2.08154	-1.05765	2.08154	down	-2.12435	-1.08702	2.12435	down	186.807	298.171	427.148	171.462	256.649	363.835	353.171	258.26	249.676	-0.00274572	-0.468651	-0.179128	0.0243749	0	-0.763019	0.785277	0.74532	0.991826	ATP11B	Homo sapiens ATPase, class VI, type 11B (ATP11B), mRNA [NM_014616]	182638681	chr3	182638622	+	FALSE	hs|3q26.33	23200	NM_014616	ATPase, class VI, type 11B	chr3:182638622-182638681	GO:0000287|GO:0005886|GO:0015075|GO:0005637|GO:0055085|GO:0005524|GO:0015662|GO:0006754|GO:0034220|GO:0016787|GO:0000166|GO:0015914|GO:0005488|GO:0004012|GO:0016820|GO:0016021|GO:0015917|GO:0006811	NM_014616	Hs.478429
A_24_P9671	0.00774449	1.03237	0.045957	1.03237	up	-1.43804	-0.524101	1.43804	down	-1.48458	-0.570058	1.48458	down	5968.42	7770.58	9594.36	6942.26	8095.55	9689.33	8796.31	8774.18	7775.32	0	0.16209	-0.133756	-0.0452528	-0.0351114	-0.0291718	0.682647	0.647473	0.270519	DNAJA1	Homo sapiens DnaJ (Hsp40) homolog, subfamily A, member 1 (DNAJA1), mRNA [NM_001539]	33037066	chr9	33036682	+	FALSE	hs|9p21.1	3301	NM_001539	DnaJ (Hsp40) homolog, subfamily A, member 1	chr9:33036682-33037066	GO:0005515|GO:0006986|GO:0009408|GO:0005625|GO:0007283|GO:0030317|GO:0005524|GO:0046872|GO:0005737|GO:0016020|GO:0006457|GO:0042769|GO:0031072|GO:0051082|GO:0030521|GO:0050750	NM_001539	Hs.445203
A_23_P109143	0.000571069	-2.08804	-1.06215	2.08804	down	-1.23145	-0.300363	1.23145	down	1.69559	0.761787	1.69559	up	3199.84	3628.06	4850.3	4092.16	4406.29	7045.43	4127.22	2955.41	3563.7	-0.0721598	-0.3387	-0.212218	0.775764	0.936975	0.850634	0	0.364038	-0.0860281	PRNP	Homo sapiens prion protein (PRNP), transcript variant 1, mRNA [NM_000311]	4681982	chr20	4681923	+	FALSE	hs|20p13	5621	NM_000311	prion protein	chr20:4681923-4681982	GO:0005515|GO:0008017|GO:0043008|GO:0005886|GO:0005783|GO:0046007|GO:0051087|GO:0005634|GO:0031225|GO:0046872|GO:0043433|GO:0042802|GO:0005737|GO:0006878|GO:0015631|GO:0007411|GO:0051260|GO:0007050|GO:0006979|GO:0032689|GO:0032703|GO:0005794|GO:0005507|GO:0005624|GO:0006916|GO:0070885|GO:0050860|GO:0032700|GO:0007049|GO:0008152|GO:0001933|GO:0045121|GO:0046688|GO:0046686|GO:0019898	NM_000311	Hs.472010
A_23_P149281	0.00934054	-1.85123	-0.888483	1.85123	down	-2.04651	-1.03317	2.04651	down	-1.10549	-0.144684	1.10549	down	58.2813	64.5769	88.3529	56.9634	113.858	98.1703	153.248	82.7896	93.2278	-1.00466	-0.331954	-1.0002	0	-0.0265054	0.355145	0.270444	0.0115647	0.480683	EPHA2	Homo sapiens EPH receptor A2 (EPHA2), mRNA [NM_004431]	16455972	chr1	16451800	-	FALSE	hs|1p36.13	1969	NM_004431	EPH receptor A2	chr1:16455972-16451800	GO:0051898|GO:0005515|GO:0033628|GO:0030054|GO:0005886|GO:0042995|GO:0014028|GO:0010591|GO:0005003|GO:0000166|GO:0030182|GO:0004872|GO:0060035|GO:0031256|GO:0001568|GO:0048013|GO:0031258|GO:0035121|GO:0006915|GO:0007275|GO:0032587|GO:0001525|GO:0070848|GO:0032863|GO:0005524|GO:0043535|GO:0001501|GO:0060326|GO:0005887|GO:0043491|GO:0021915|GO:0004714|GO:0005925|GO:0001570|GO:0090004|GO:0048320	NM_004431	Hs.171596
A_23_P145874	0.000284868	-3.24479	-1.69812	3.24479	down	-1.30133	-0.37999	1.30133	down	2.49343	1.31813	2.49343	up	200.269	179.173	263.032	287.24	277.98	422.381	395.371	194.353	225.763	0	-0.711294	-0.442454	1.11991	1.31073	1.50998	0.0273118	-0.0160818	-0.0250087	SAMD9L	Homo sapiens sterile alpha motif domain containing 9-like (SAMD9L), mRNA [NM_152703]	92760278	chr7	92760219	-	FALSE	hs|7q21.2	219285	NM_152703	sterile alpha motif domain containing 9-like	chr7:92760278-92760219		NM_152703	Hs.489118
A_23_P87351	0.00211454	1.40787	0.493512	1.40787	up	-1.39014	-0.475226	1.39014	down	-1.95713	-0.968738	1.95713	down	5190.12	7418.73	7721.49	6206.26	5671.36	7209.57	7501.36	6707.53	7036.27	0.0975571	0	-0.253757	-0.50458	-0.390202	-0.741952	0.314461	0.649882	0.305136	RRM1	Homo sapiens ribonucleotide reductase M1 (RRM1), mRNA [NM_001033]	4160006	chr11	4159947	+	FALSE	hs|11p15.4	6240	NM_001033	ribonucleotide reductase M1	chr11:4159947-4160006	GO:0006260|GO:0005737|GO:0015949|GO:0009263|GO:0000166|GO:0016491|GO:0055086|GO:0005971|GO:0005654|GO:0004748|GO:0005524|GO:0005829	NM_001033	Hs.445705
A_24_P50489	0.0065526	1.20757	0.272106	1.20757	up	-1.15396	-0.206597	1.15396	down	-1.39349	-0.478703	1.39349	down	11562.5	20236.5	18531.4	15703.1	16288.4	13409.4	14959	16910.4	18370.5	0	0.0963734	-0.114093	-0.186481	-0.242639	-0.404918	0.133935	0.122255	0.345881			170087991	chr4	170087928	+	FALSE	hs|4q32.3				chr4:170087928-170087991
A_23_P93295	0.00301106	-1.26226	-0.336012	1.26226	down	-2.71992	-1.44356	2.71992	down	-2.1548	-1.10755	2.1548	down	10.8468	11.2556	42.159	13.9961	31.967	21.9895	105.168	25.7293	21.6322	-0.284595	-0.260755	-0.169731	-0.289269	0	0.582223	1.18649	1.51109	0.918032	OR12D2	Homo sapiens olfactory receptor, family 12, subfamily D, member 2 (OR12D2), mRNA [NM_013936]	29364725	chr6	29364666	+	FALSE	hs|6p22.1	26529	NM_013936	olfactory receptor, family 12, subfamily D, member 2	chr6:29364666-29364725	GO:0004984|GO:0005886|GO:0004930|GO:0004872|GO:0016021|GO:0050896	NM_013936	Hs.247862
A_23_P56855	0.00501625	-2.40302	-1.26485	2.40302	down	-3.05867	-1.6129	3.05867	down	-1.27284	-0.348055	1.27284	down	118.925	80.6282	165.588	156.9	197.158	229.94	768.977	197.985	216.064	-1.15511	-1.8608	-0.9172	0.154358	-0.29292	0	0.754294	0.0960419	0.0552665	POTEC	Homo sapiens POTE ankyrin domain family, member C (POTEC), mRNA [NM_001137671]	14511750	chr18	14511737	-	FALSE	hs|18p11.21	388468	NM_001137671	POTE ankyrin domain family, member C	chr18:14511750-14511737		NM_001137671	Hs.454726
A_24_P394940	0.00331031	-1.00811	-0.0116471	1.00811	down	-4.5028	-2.17082	4.5028	down	-4.46659	-2.15917	4.46659	down	15.6262	17.5936	14.9316	14.1279	16.7639	11.5182	88.2758	33.3276	24.8988	-0.0505344	0	-1.03289	-0.402828	0.207176	-0.852831	1.56327	2.32439	1.54138	CYP2E1	Homo sapiens cytochrome P450, family 2, subfamily E, polypeptide 1 (CYP2E1), mRNA [NM_000773]	135346326	chr10	135346267	+	FALSE	hs|10q26.3	1571	NM_000773	cytochrome P450, family 2, subfamily E, polypeptide 1	chr10:135346267-135346326	GO:0005792|GO:0006805|GO:0017144|GO:0005783|GO:0009055|GO:0016098|GO:0046872|GO:0004497|GO:0019825|GO:0016020|GO:0016709|GO:0005789|GO:0016491|GO:0016712|GO:0019899|GO:0008202|GO:0055114|GO:0046483|GO:0020037	NM_000773	Hs.12907
A_23_P152107	0.00603396	1.34977	0.432718	1.34977	up	-1.50276	-0.587616	1.50276	down	-2.02839	-1.02033	2.02839	down	8366.99	11743.3	10648.4	7704.79	8478.47	10092.2	9087.38	10079.2	11877.8	0.205248	0	-0.415142	-0.52832	-0.461281	-0.518447	0.228715	0.555776	0.768462	UBE2I	Homo sapiens ubiquitin-conjugating enzyme E2I (UBE2I), transcript variant 2, mRNA [NM_194259]	1375007	chr16	1374948	+	FALSE	hs|16p13.3	7329	NM_194259	ubiquitin-conjugating enzyme E2I	chr16:1374948-1375007	GO:0005515|GO:0006511|GO:0004842|GO:0010469|GO:0016567|GO:0016874|GO:0045202|GO:0005634|GO:0030425|GO:0051091|GO:0005737|GO:0007059|GO:0000166|GO:0044419|GO:0043398|GO:0019789|GO:0000795|GO:0016881|GO:0016925|GO:0043425|GO:0000122|GO:0008022|GO:0005524|GO:0007049|GO:0007067|GO:0016605|GO:0033145|GO:0001650|GO:0043161|GO:0019899|GO:0072500|GO:0045892|GO:0006464|GO:0051301|GO:0008134	NM_194259	Hs.302903
A_24_P356721	0.00593399	1.13128	0.177958	1.13128	up	-1.41567	-0.501487	1.41567	down	-1.60152	-0.679445	1.60152	down	22678.8	34012.1	35394.5	23062.1	27859.1	31578.1	29605.2	34137.6	29552.1	0	0.136528	-0.327531	-0.248123	-0.281664	-0.19509	0.613765	0.331837	0.367856	RPL18	Homo sapiens ribosomal protein L18 (RPL18), mRNA [NM_000979]	49121052	chr19	49120626	-	FALSE	hs|19q13.33	6141	NM_000979	ribosomal protein L18	chr19:49121052-49120626	GO:0010467|GO:0003735|GO:0003723|GO:0019083|GO:0019058|GO:0006415|GO:0006412|GO:0005829|GO:0006414|GO:0005622|GO:0005737|GO:0031018|GO:0005840|GO:0016032|GO:0022625|GO:0044267	NM_000979	Hs.515517
A_23_P110846	0.00337735	1.48472	0.570192	1.48472	up	-1.5022	-0.587073	1.5022	down	-2.23034	-1.15727	2.23034	down	2314.99	2054.52	2501.91	1266.12	1588.31	2546	2658.48	2475.89	2351.14	0.378588	0	-0.155916	-0.342214	-0.417691	-0.728001	0.474597	0.938536	0.570759	CNOT8	Homo sapiens CCR4-NOT transcription complex, subunit 8 (CNOT8), mRNA [NM_004779]	154255872	chr5	154255813	+	FALSE	hs|5q33.2	9337	NM_004779	CCR4-NOT transcription complex, subunit 8	chr5:154255813-154255872	GO:0005515|GO:0006355|GO:0003700|GO:0008285|GO:0016070|GO:0016071|GO:0005634|GO:0003676|GO:0006351|GO:0005829|GO:0005622|GO:0005737|GO:0000289|GO:0000288	NM_004779	Hs.26703
A_23_P335143	0.00185441	-1.99608	-0.997168	1.99608	down	1.28791	0.365032	1.28791	up	2.57077	1.3622	2.57077	up	66.6869	80.64	101.619	106.912	138.886	182.285	132.014	62.785	103.2	-0.0584364	-0.165766	0.0980307	1.11939	0.886712	0.85923	-0.394761	-0.826507	0	SNRPN	small nuclear ribonucleoprotein polypeptide N [Source:HGNC Symbol;Acc:11164] [ENST00000346403]	25225220	chr15	25225161	+	FALSE	hs|15q11.2	6638	AF319522	small nuclear ribonucleoprotein polypeptide N	chr15:25225161-25225220	GO:0008380|GO:0005515|GO:0003723|GO:0030532|GO:0005681|GO:0005634|GO:0042802		Hs.564847
A_23_P163099	0.00435136	1.15396	0.206589	1.15396	up	-1.43531	-0.521361	1.43531	down	-1.65628	-0.727949	1.65628	down	405.037	414.983	646.828	348.291	446.22	645.657	634.578	487.341	446.087	0.111065	-0.245077	0	-0.230683	-0.124603	-0.398492	0.383237	0.676875	0.369958	POLE2	Homo sapiens polymerase (DNA directed), epsilon 2 (p59 subunit) (POLE2), transcript variant 1, mRNA [NM_002692]	50122470	chr14	50122411	-	FALSE	hs|14q21.3	5427	NM_002692	polymerase (DNA directed), epsilon 2 (p59 subunit)	chr14:50122470-50122411	GO:0003887|GO:0016779|GO:0005730|GO:0000216|GO:0005634|GO:0003677|GO:0043231|GO:0000084|GO:0006260|GO:0006261|GO:0000082|GO:0006281|GO:0000723|GO:0006283|GO:0006270|GO:0000722|GO:0006297|GO:0005654|GO:0006289|GO:0000278|GO:0032201|GO:0016740	NM_002692	Hs.162777
A_23_P33809	0.00910208	1.15746	0.210958	1.15746	up	-1.22699	-0.295124	1.22699	down	-1.42019	-0.506082	1.42019	down	4980.43	5752.89	7448.73	5432.77	6048.78	8204.14	6867.26	4571.93	6386.26	0	0.0574923	-0.27403	-0.222542	-0.32653	-0.300341	0.299461	0.0730743	0.296299	IMP3	Homo sapiens IMP3, U3 small nucleolar ribonucleoprotein, homolog (yeast) (IMP3), mRNA [NM_018285]	75931766	chr15	75931707	-	FALSE	hs|15q24.2	55272	NM_018285	IMP3, U3 small nucleolar ribonucleoprotein, homolog (yeast)	chr15:75931766-75931707	GO:0005515|GO:0030529|GO:0006364|GO:0005730|GO:0005634|GO:0019843	NM_018285	Hs.513043
A_23_P56798	0.00172534	1.15127	0.203221	1.15127	up	-1.60382	-0.681514	1.60382	down	-1.84643	-0.884735	1.84643	down	4815.21	6081.91	7668.04	5198.4	5577.02	7145.33	6938.67	6904.66	6510.86	0.130775	-0.110838	0	-0.033578	-0.116982	-0.439167	0.646192	0.870317	0.54797	ACP1	Homo sapiens acid phosphatase 1, soluble (ACP1), transcript variant 3, mRNA [NM_004300]	277958	chr2	277899	+	FALSE	hs|2p25.3	52	NM_004300	acid phosphatase 1, soluble	chr2:277899-277958	GO:0005737|GO:0016787|GO:0003993|GO:0009898|GO:0005634|GO:0005625|GO:0042802|GO:0004726	NM_004300	Hs.558296
A_23_P122052	0.00800459	-2.86771	-1.5199	2.86771	down	-1.68216	-0.750318	1.68216	down	1.70477	0.76958	1.70477	up	557.423	553.482	767.625	750.736	768.876	1209.21	919.043	526.22	652.124	-0.26337	-1.17292	-1.04172	0.283593	0.683558	1.11453	0	0.0071187	-0.234182	GPX8	Homo sapiens glutathione peroxidase 8 (putative) (GPX8), mRNA [NM_001008397]	54460313	chr5	54460254	+	FALSE	hs|5q11.2	493869	NM_001008397	glutathione peroxidase 8 (putative)	chr5:54460254-54460313	GO:0004602|GO:0016020|GO:0016491|GO:0016021|GO:0006979	NM_001008397	Hs.289044
A_23_P125423	0.00271632	-1.16197	-0.216578	1.16197	down	1.82022	0.864115	1.82022	up	2.11505	1.08069	2.11505	up	393.147	445.746	663.663	514.513	539.066	710.374	588.497	389.999	428.028	0	-0.0351396	0.460582	0.227912	0.388074	0.459188	-0.444305	-0.75874	-0.963857	C1R	Homo sapiens complement component 1, r subcomponent (C1R), mRNA [NM_001733]	7187626	chr12	7187567	-	FALSE	hs|12p13.31	715	NM_001733	complement component 1, r subcomponent	chr12:7187626-7187567	GO:0006956|GO:0006955|GO:0004252|GO:0045087|GO:0006958|GO:0005509|GO:0006508|GO:0008236|GO:0008233|GO:0005576	NM_001733	Hs.524224
A_23_P257763	0.000965988	-1.07106	-0.0990357	1.07106	down	-2.83973	-1.50575	2.83973	down	-2.65133	-1.40672	2.65133	down	16.6783	17.4683	24.538	29.3071	25.0493	10.1116	321.493	31.6633	30.0736	-0.139258	-0.0829115	-0.259034	0	0.0977378	-0.281834	1.21708	1.82681	0.992162	BOC	Homo sapiens Boc homolog (mouse) (BOC), mRNA [NM_033254]	113004257	chr3	113003685	+	FALSE	hs|3q13.2	91653	NM_033254	Boc homolog (mouse)	chr3:113003685-113004257	GO:0005515|GO:0030424|GO:0005886|GO:0007224|GO:0030426|GO:0042692|GO:0051789|GO:0051149|GO:0007411|GO:0045663|GO:0030030|GO:0043025|GO:0016021|GO:0007155	NM_033254	Hs.591318
A_23_P83175	0.000581674	1.99561	0.99683	1.99561	up	-4.2427	-2.08498	4.2427	down	-8.46678	-3.08181	8.46678	down	31.6644	39.4096	45.307	29.2821	28.6628	44.4187	162.097	53.2893	43.3278	0.076087	0	-0.242761	-0.430716	-0.988005	-1.73844	2.30553	2.2916	1.49115	PTPLAD2	Homo sapiens protein tyrosine phosphatase-like A domain containing 2 (PTPLAD2), mRNA [NM_001010915]	21015992	chr9	21015933	-	FALSE	hs|9p21.3	401494	NM_001010915	protein tyrosine phosphatase-like A domain containing 2	chr9:21015992-21015933	GO:0016020|GO:0005783|GO:0005789|GO:0006633|GO:0016021|GO:0016829	NM_001010915	Hs.716678
A_23_P40433	0.0093202	1.50432	0.589107	1.50432	up	-3.12538	-1.64403	3.12538	down	-4.70156	-2.23314	4.70156	down	30.8607	29.1309	81.9328	30.2949	40.8043	29.8043	767.574	50.7339	42.1357	-0.312371	0	0.874616	-0.136645	-0.0540063	-1.01443	2.43146	1.90452	1.15837	C21orf63	Homo sapiens chromosome 21 open reading frame 63 (C21orf63), mRNA [NM_058187]	33840050	chr21	33830016	+	FALSE	hs|21q22.11	59271	NM_058187	chromosome 21 open reading frame 63	chr21:33830016-33840050	GO:0016020|GO:0005529|GO:0016021	NM_058187	Hs.208358
A_32_P132169	0.000187793	1.66131	0.732318	1.66131	up	-2.94181	-1.5567	2.94181	down	-4.88724	-2.28902	4.88724	down	20.6369	20.0977	21.5773	21.6314	21.481	8.18755	164.655	36.3822	26.9963	0.00882697	-0.00776094	0	-1.02465	-0.999741	-0.1715	1.6787	1.54224	1.45023			20105516	chr10	20105457	-	FALSE	hs|10p12.31				chr10:020105516-020105457
A_24_P383267	0.00305325	1.24471	0.315808	1.24471	up	-3.07831	-1.62214	3.07831	down	-3.8316	-1.93795	3.8316	down	11.2288	8.95888	5.50427	8.55869	5.67609	4.80836	93.9228	20.1893	16.2815	-0.0722907	0.238608	0	-0.358733	-0.269369	-0.153005	1.00178	2.42867	1.60229	KIAA1751	Homo sapiens KIAA1751 (KIAA1751), mRNA [NM_001080484]	1895296	chr1	1895237	-	FALSE	hs|1p36.33	85452	NM_001080484	KIAA1751	chr1:1895296-1895237		NM_001080484	Hs.232092
A_23_P205428	0.00395417	1.29384	0.371654	1.29384	up	-2.82813	-1.49985	2.82813	down	-3.65913	-1.8715	3.65913	down	48.8007	61.0714	69.2733	79.1993	51.4507	80.5826	177.904	60.9197	69.8723	-0.165234	0.53509	-0.171744	0	-0.315086	-0.601765	1.7555	1.99128	0.950879	FOXG1	Homo sapiens forkhead box G1 (FOXG1), mRNA [NM_005249]	29238648	chr14	29238589	+	FALSE	hs|14q12	2290	NM_005249	forkhead box G1	chr14:29238589-29238648	GO:0005515|GO:0003705|GO:0005634|GO:0009953|GO:0009792|GO:0051090|GO:0003690|GO:0048667|GO:0016199|GO:0045944|GO:0009888|GO:0022008|GO:0005667|GO:0006355|GO:0042472|GO:0008301|GO:0021954|GO:0002052|GO:0007275|GO:0035058|GO:0045787|GO:0003677|GO:0043565|GO:0007346|GO:0045665|GO:0007420|GO:0030900|GO:0045892|GO:0030902|GO:0043584|GO:0008134	NM_005249	Hs.695962
A_23_P154522	0.00301723	-1.01905	-0.0272301	1.01905	down	-1.89017	-0.918518	1.89017	down	-1.85483	-0.891288	1.85483	down	771.749	979.869	1212.95	777.552	977.705	1551.41	1322.74	862.336	1197.1	0.0344285	-0.495249	-0.1667	-0.2509	0	-0.29493	0.473969	0.833948	0.820116	MTA3	Homo sapiens metastasis associated 1 family, member 3 (MTA3), mRNA [NM_020744]	42935168	chr2	42935109	+	FALSE	hs|2p21	57504	NM_020744	metastasis associated 1 family, member 3	chr2:42935109-42935168	GO:0043565|GO:0003700|GO:0008270|GO:0005634|GO:0046872	NM_020744	Hs.435413
A_23_P351903	0.00320945	1.01016	0.0145813	1.01016	up	-1.47095	-0.556751	1.47095	down	-1.48589	-0.571332	1.48589	down	1844.87	2099.19	2752.55	1745.58	2128.22	2921.53	2588.56	2185.35	2518.32	-0.0334166	-0.049445	-0.0991363	0.0328343	0	-0.258576	0.301552	0.599863	0.58684	TMEM167A	Homo sapiens transmembrane protein 167A (TMEM167A), mRNA [NM_174909]	82360833	chr5	82352956	-	FALSE	hs|5q14.2	153339	NM_174909	transmembrane protein 167A	chr5:82360833-82352956	GO:0005794|GO:0016020|GO:0000139|GO:0016021	NM_174909	Hs.355606
A_24_P333541	0.00449693	-1.10309	-0.141555	1.10309	down	-2.80028	-1.48557	2.80028	down	-2.53857	-1.34401	2.53857	down	17.817	14.8269	26.0055	11.8196	23.508	22.5336	85.9685	37.5432	25.1727	-0.553054	0	-0.118778	-0.358303	0.421866	-0.31073	1.01673	1.66275	1.1054		Homo sapiens cDNA clone IMAGE:4715948, partial cds. [BC015876]	56700917	chr12	56700858	-	FALSE	hs|12q13.3		BC015876		chr12:56700917-56700858			Hs.680636
A_23_P359245	0.00399855	-1.5999	-0.677978	1.5999	down	1.14068	0.189898	1.14068	up	1.82497	0.867875	1.82497	up	1786.95	2083.56	2868.24	2799.73	2537.37	3568.44	2871.36	1724.46	2246.54	0.144365	-0.211941	-0.0720994	0.412869	0.694582	0.786807	-0.279161	0	-0.430206	MET	Homo sapiens met proto-oncogene (hepatocyte growth factor receptor) (MET), transcript variant 2, mRNA [NM_000245]	116438349	chr7	116438290	+	FALSE	hs|7q31.2	4233	NM_000245	met proto-oncogene (hepatocyte growth factor receptor)	chr7:116438290-116438349	GO:0005008|GO:0005515|GO:0048012|GO:0005886|GO:0008283|GO:0007275|GO:0005524|GO:0007165|GO:0009925|GO:0000166|GO:0005887|GO:0007411|GO:0004872|GO:0016021|GO:0004713|GO:0007166	NM_000245	Hs.132966
A_24_P935082	0.00687217	-1.30477	-0.383798	1.30477	down	-2.41099	-1.26963	2.41099	down	-1.84783	-0.88583	1.84783	down	13.1774	10.7779	41.2183	42.0208	35.0783	26.4792	124.236	33.9502	23.9436	-0.752971	-0.105171	-0.0698033	0	-0.148615	0.372065	0.810593	1.284	0.786347			14394049	chr3	14393990	+	FALSE	hs|3p25.1				chr3:014393990-014394049
A_23_P121657	0.00808577	1.95009	0.96354	1.95009	up	-2.98627	-1.57834	2.98627	down	-5.82349	-2.54188	5.82349	down	68.2401	63.2296	84.9959	64.4743	66.3319	93.7012	190.161	83.6398	79.023	0	1.27664	-0.528497	-0.669007	-1.21311	-0.260353	1.93	2.15475	1.39843	HS3ST1	Homo sapiens heparan sulfate (glucosamine) 3-O-sulfotransferase 1 (HS3ST1), mRNA [NM_005114]	11400729	chr4	11400670	-	FALSE	hs|4p15.33	9957	NM_005114	heparan sulfate (glucosamine) 3-O-sulfotransferase 1	chr4:11400729-11400670	GO:0005737|GO:0005794|GO:0005796|GO:0008146|GO:0016021|GO:0008467|GO:0016740	NM_005114	Hs.507348
A_24_P153713	0.0064857	1.04191	0.0592318	1.04191	up	1.88029	0.910953	1.88029	up	1.80465	0.851721	1.80465	up	232.753	204.416	526.851	488.732	444.262	437.031	318.636	180.428	258.384	0.197348	-0.0209765	0.401513	0.199249	0	0.20094	-1.11736	-0.554243	-0.48337	MARVELD3	Homo sapiens MARVEL domain containing 3, mRNA (cDNA clone IMAGE:2820819), partial cds. [BC005052]	71663542	chr16	71663483	+	FALSE	hs|16q22.2	91862	BC005052	MARVEL domain containing 3	chr16:71663483-71663542	GO:0016020|GO:0016021		Hs.513706
A_32_P386636	0.00578009	-2.13876	-1.09678	2.13876	down	-3.84521	-1.94306	3.84521	down	-1.79787	-0.846287	1.79787	down	16.252	14.7093	58.2314	39.1011	32.9905	36.3262	645.244	22.938	17.8195	-1.27004	-1.21482	-0.406419	0.670162	-0.271106	0	0.527265	1.23691	1.17374	FAM170A	Homo sapiens family with sequence similarity 170, member A (FAM170A), transcript variant 1, mRNA [NM_182761]	118969795	chr5	118969736	+	FALSE	hs|5q23.1	340069	NM_182761	family with sequence similarity 170, member A	chr5:118969736-118969795	GO:0005622|GO:0008270|GO:0046872	NM_182761	Hs.713304
A_24_P349264	0.00200405	1.2521	0.324348	1.2521	up	-2.64974	-1.40585	2.64974	down	-3.31773	-1.7302	3.31773	down	21.3986	21.7417	34.7913	26.3136	27.9791	22.2028	328.3	36.3348	35.0827	-0.0616363	-0.0928748	0.414373	-0.459686	0	-0.253495	2.00413	1.42616	1.04712	KRT80	Homo sapiens keratin 80 (KRT80), transcript variant 1, mRNA [NM_182507]	52574353	chr12	52567546	-	FALSE	hs|12q13.13	144501	NM_182507	keratin 80	chr12:52574353-52567546	GO:0005198|GO:0045095	NM_182507	Hs.140978
A_32_P61313	0.00312309	1.7097	0.773747	1.7097	up	-3.84117	-1.94154	3.84117	down	-6.56726	-2.71529	6.56726	down	12.4359	11.4261	11.1604	14.7023	9.14947	6.41569	249.844	22.6827	18.7928	0	0.148285	-0.914949	-1.31665	-1.13572	-0.635541	0.830529	2.10482	2.12262		BX105574 Soares_fetal_liver_spleen_1NFLS_S1 Homo sapiens cDNA clone IMAGp998N07974, mRNA sequence [BX105574]	124818478	chr10	124818419	+	FALSE	hs|10q26.13		BX105574		chr10:124818419-124818478			Hs.141748
A_23_P136777	0.00716049	1.2134	0.279058	1.2134	up	-3.05579	-1.61155	3.05579	down	-3.70791	-1.89061	3.70791	down	33.4426	37.1519	58.5448	38.8758	62.235	56.1964	163.655	49.4272	46.7438	0	-0.0999635	-0.533342	-0.505526	-1.2767	0.311747	1.37728	1.59727	1.22679	APOD	Homo sapiens apolipoprotein D (APOD), mRNA [NM_001647]	195300767	chr3	195298224	-	FALSE	hs|3q29	347	NM_001647	apolipoprotein D	chr3:195300767-195298224	GO:0006629|GO:0005622|GO:0005515|GO:0005215|GO:0006869|GO:0005576|GO:0005615|GO:0005319|GO:0008289	NM_001647	Hs.522555
A_24_P62783	0.00769437	1.79182	0.841422	1.79182	up	-3.14085	-1.65115	3.14085	down	-5.62782	-2.49258	5.62782	down	46.8224	30.7091	74.4997	59.0194	62.6066	33.8217	235.439	59.8363	65.943	0	0.727727	-0.465646	-1.22388	-1.01484	-0.0234642	2.37244	1.75639	1.08672	FABP3	Homo sapiens fatty acid binding protein 3, muscle and heart (mammary-derived growth inhibitor) (FABP3), mRNA [NM_004102]	31842266	chr1	31840317	-	FALSE	hs|1p35.2	2170	NM_004102	fatty acid binding protein 3, muscle and heart (mammary-derived growth inhibitor)	chr1:31842266-31840317	GO:0005215|GO:0032868|GO:0005504|GO:0008285|GO:0005324|GO:0042493|GO:0050543|GO:0005829|GO:0008289|GO:0016528|GO:0070542|GO:0006631|GO:0006656	NM_004102	Hs.657242
A_32_P200490	0.000217311	1.08336	0.11551	1.08336	up	-1.34818	-0.431018	1.34818	down	-1.46057	-0.546528	1.46057	down	123.908	139.09	233.195	126.913	170.751	236.286	1070.52	159.049	174.554	-0.0608668	0	0.00470728	-0.150111	-0.15955	-0.0930281	0.48484	0.279375	0.47268	LOC554206	AGENCOURT_6405547 NIH_MGC_85 Homo sapiens cDNA clone IMAGE:5500111 5', mRNA sequence [BM455175]	25069422	chr16	25069363	+	FALSE	hs|16p12.1	554206	BM455175	leucine carboxyl methyltransferase 1 pseudogene	chr16:025069363-025069422			Hs.711597
A_23_P23303	0.000587243	1.26258	0.336374	1.26258	up	-1.19365	-0.255383	1.19365	down	-1.50708	-0.591757	1.50708	down	996.332	1036.22	1472.62	995.336	1132.81	1258.17	1849.75	1097.41	1192.24	-0.0656549	0.145837	0	-0.295196	-0.315198	-0.318546	0.406079	0.247503	0.192749	EXO1	Homo sapiens exonuclease 1 (EXO1), transcript variant 3, mRNA [NM_003686]	242048776	chr1	242048717	+	FALSE	hs|1q43	9156	NM_003686	exonuclease 1	chr1:242048717-242048776	GO:0005515|GO:0035312|GO:0008409|GO:0045190|GO:0051908|GO:0005634|GO:0006310|GO:0016446|GO:0003677|GO:0046872|GO:0004527|GO:0004519|GO:0006281|GO:0007126|GO:0045145|GO:0004523|GO:0043566|GO:0048256|GO:0006298|GO:0002455	NM_003686	Hs.498248
A_23_P207905	0.00552292	1.02089	0.0298313	1.02089	up	-1.96785	-0.976621	1.96785	down	-2.00896	-1.00645	2.00896	down	45.2692	45.9843	83.3412	51.4102	75.3033	74.3222	239.786	55.567	46.395	0	-0.362173	-0.0336567	-0.334303	-0.203428	0.0524077	1.19138	0.877154	0.465502	SECTM1	Homo sapiens secreted and transmembrane 1 (SECTM1), mRNA [NM_003004]	80280754	chr17	80280188	-	FALSE	hs|17q25.3	6398	NM_003004	secreted and transmembrane 1	chr17:80280754-80280188	GO:0007165|GO:0006955|GO:0005794|GO:0005886|GO:0007498|GO:0005576|GO:0016021|GO:0004871|GO:0043123|GO:0005615|GO:0005125	NM_003004	Hs.558009
A_23_P118791	0.00556726	1.06671	0.0931674	1.06671	up	1.80625	0.852994	1.80625	up	1.69329	0.759827	1.69329	up	226.722	191.296	340.385	239.064	245.528	332.633	337.153	173.099	226.952	0.218728	-0.0325464	0.598401	0	0.222778	0.282302	-0.435455	-0.683171	-0.655775	TMEM107	Homo sapiens transmembrane protein 107 (TMEM107), transcript variant 1, mRNA [NM_032354]	8076747	chr17	8076688	-	FALSE	hs|17p13.1	84314	NM_032354	transmembrane protein 107	chr17:8076747-8076688	GO:0008150|GO:0003674|GO:0016020|GO:0016021|GO:0005575	NM_032354	Hs.513933
A_23_P159764	0.00393821	1.35834	0.44184	1.35834	up	-2.9485	-1.55998	2.9485	down	-4.00506	-2.00182	4.00506	down	18.0896	17.8301	19.7058	27.3199	23.1254	13.8056	269.653	37.3225	33.1757	0	0.247682	-0.13334	-0.202894	-0.0416182	-0.966667	1.33334	2.26723	1.19372	POF1B	Homo sapiens premature ovarian failure, 1B (POF1B), mRNA [NM_024921]	84532790	chrX	84532731	-	FALSE	hs|Xq21.1	79983	NM_024921	premature ovarian failure, 1B	chrX:84532790-84532731	GO:0003779	NM_024921	Hs.267038
A_24_P924118	0.00531221	1.28261	0.359081	1.28261	up	-2.26228	-1.17778	2.26228	down	-2.90162	-1.53686	2.90162	down	13.1964	9.36148	5.23849	8.56607	5.69738	4.80183	328.003	23.2045	20.0538	-0.377271	0.200432	0	-0.514107	-0.425526	-0.314449	0.487918	1.55779	1.31079			31349531	chr22	31349472	+	FALSE	hs|22q12.2				chr22:031349472-031349531
A_23_P323166	0.0022549	-1.07021	-0.0978948	1.07021	down	-1.80799	-0.854384	1.80799	down	-1.68937	-0.756489	1.68937	down	10330.1	15893.3	21916.4	15949.1	18624.3	19493.1	14172.1	12383.8	16606.9	-0.0263626	-0.269397	-0.0447665	0.0413848	0	-0.0882265	0.804666	0.438337	0.979624	SRRM2	Homo sapiens serine/arginine repetitive matrix 2 (SRRM2), mRNA [NM_016333]	2821247	chr16	2821188	+	FALSE	hs|16p13.3	23524	NM_016333	serine/arginine repetitive matrix 2	chr16:2821188-2821247	GO:0008380|GO:0005515|GO:0047485|GO:0015030|GO:0016607|GO:0000398|GO:0003723|GO:0070742|GO:0005634|GO:0071013	NM_016333	Hs.433343
A_23_P379159	0.00643489	1.0551	0.0773837	1.0551	up	1.21862	0.285248	1.21862	up	1.15498	0.207865	1.15498	up	558.186	470.14	682.711	628.99	607.172	887.872	974.607	496.358	713.02	0	0.212989	0.0434543	0.0224173	-0.0416642	0.0435391	-0.193515	-0.218803	-0.186984	BRWD3	Homo sapiens bromodomain and WD repeat domain containing 3 (BRWD3), mRNA [NM_153252]	79937568	chrX	79937509	-	FALSE	hs|Xq21.1	254065	NM_153252	bromodomain and WD repeat domain containing 3	chrX:79937568-79937509		NM_153252	Hs.147027
A_23_P167212	0.00745723	1.21505	0.281019	1.21505	up	1.31497	0.395025	1.31497	up	1.08223	0.114005	1.08223	up	2584.27	1993.98	2846.02	2224.3	2115.39	3439.79	2961.19	1949.73	2679.31	0.253433	0.303137	0.189256	-0.109862	-0.0456665	0.0582964	-0.159868	-0.279381	0	QDPR	Human dihydropteridine reductase (hDHPR) mRNA, complete cds. [M16447]	17488364	chr4	17488305	-	FALSE	hs|4p15.32	5860	M16447	quinoid dihydropteridine reductase	chr4:17488364-17488305	GO:0006520|GO:0006559|GO:0010288|GO:0051066|GO:0006729|GO:0009055|GO:0005625|GO:0070404|GO:0010044|GO:0070402|GO:0035690|GO:0042803|GO:0005829|GO:0001889|GO:0005739|GO:0034641|GO:0005737|GO:0005488|GO:0033762|GO:0016491|GO:0004155|GO:0019717		Hs.75438
A_23_P86315	0.00382489	1.1755	0.23328	1.1755	up	-2.22998	-1.15703	2.22998	down	-2.62135	-1.39031	2.62135	down	22.9885	19.9578	46.7176	24.6485	24.6738	32.1648	124.94	28.2322	25.7639	0.0138817	-0.808404	0	-0.177648	-0.7117	-0.605013	0.865958	0.984458	0.826155	HFE2	Homo sapiens hemochromatosis type 2 (juvenile) (HFE2), transcript variant a, mRNA [NM_213653]	145416966	chr1	145416907	+	FALSE	hs|1q21.1	148738	NM_213653	hemochromatosis type 2 (juvenile)	chr1:145416907-145416966	GO:0016323|GO:0009986|GO:0005886|GO:0007411|GO:0031225|GO:0005615	NM_213653	Hs.632436
A_23_P11070	7.4128e-05	1.58848	0.667645	1.58848	up	-3.93763	-1.97733	3.93763	down	-6.25483	-2.64497	6.25483	down	31.8198	32.972	45.3634	27.342	29.7438	25.3623	241.704	47.6088	40.3875	0	0.0853109	-0.63133	-0.56136	-0.946286	-1.04131	1.91174	1.88162	1.5926	GPR174	Homo sapiens G protein-coupled receptor 174 (GPR174), mRNA [NM_032553]	78427104	chrX	78427045	+	FALSE	hs|Xq21.1	84636	NM_032553	G protein-coupled receptor 174	chrX:78427045-78427104	GO:0005886|GO:0045028|GO:0004930|GO:0004872|GO:0016021	NM_032553	Hs.326713
A_23_P218584	0.00270378	1.90089	0.926677	1.90089	up	-6.00773	-2.58682	6.00773	down	-11.4201	-3.5135	11.4201	down	54.5255	43.992	59.0696	38.6767	50.225	68.242	519.534	58.8472	57.9555	0	0.518146	-0.676211	-0.119853	-1.22859	-1.58965	3.31518	2.59883	1.68838	BCL11A	Homo sapiens B-cell CLL/lymphoma 11A (zinc finger protein) (BCL11A), transcript variant 1, mRNA [NM_022893]	60686495	chr2	60686436	-	FALSE	hs|2p16.1	53335	NM_022893	B-cell CLL/lymphoma 11A (zinc finger protein)	chr2:60686495-60686436	GO:0030097|GO:0032463|GO:0006355|GO:0046982|GO:0003714|GO:0016925|GO:0005634|GO:0003676|GO:0048671|GO:0046872|GO:0042803|GO:0048672|GO:0005622|GO:0005737|GO:0030217|GO:0030517|GO:0045944|GO:0010629|GO:0010976|GO:0030183|GO:0050773|GO:0010977|GO:0008270|GO:2000171	NM_022893	Hs.370549
A_23_P35045	0.00483406	1.53616	0.619333	1.53616	up	-4.39375	-2.13545	4.39375	down	-6.74953	-2.75479	6.74953	down	40.266	45.1458	53.3058	37.9478	52.1717	52.0344	163.245	68.2651	51.0073	0	0.0193225	-1.72148	-0.65571	-1.59251	-1.31193	1.68653	1.69436	1.32332	ARHGAP30	Homo sapiens Rho GTPase activating protein 30 (ARHGAP30), transcript variant 1, mRNA [NM_001025598]	161017294	chr1	161017235	-	FALSE	hs|1q23.3	257106	NM_001025598	Rho GTPase activating protein 30	chr1:161017294-161017235	GO:0043547|GO:0005622|GO:0051056|GO:0007165|GO:0007264|GO:0005829|GO:0005096	NM_001025598	Hs.389374
A_24_P185314	0.00323738	-1.1655	-0.220954	1.1655	down	1.64532	0.718369	1.64532	up	1.91763	0.939323	1.91763	up	780.436	749.536	1262.35	1363.82	1043.61	1501.03	1210.03	644.077	840.489	0	-0.224365	0.371161	0.196678	0.265572	0.347407	-0.679004	-0.493166	-0.836141	NAPG	Homo sapiens N-ethylmaleimide-sensitive factor attachment protein, gamma (NAPG), mRNA [NM_003826]	10552662	chr18	10552603	+	FALSE	hs|18p11.22	8774	NM_003826	N-ethylmaleimide-sensitive factor attachment protein, gamma	chr18:10552603-10552662	GO:0005739|GO:0005515|GO:0006461|GO:0016020|GO:0006944|GO:0005488|GO:0050821|GO:0006891|GO:0005624|GO:0016192|GO:0006886	NM_003826	Hs.464622
A_24_P215407	0.00582584	-1.18372	-0.243327	1.18372	down	1.31713	0.397392	1.31713	up	1.55911	0.640719	1.55911	up	460.118	435.28	724.195	900.208	798.735	691.935	765.703	467.621	629.491	-0.0163077	0	0.0118704	0.0426265	0.338682	0.344234	-0.388556	-0.601017	-0.207041	DDX6	Homo sapiens DEAD (Asp-Glu-Ala-Asp) box polypeptide 6 (DDX6), mRNA [NM_004397]	118620979	chr11	118620920	-	FALSE	hs|11q23.3	1656	NM_004397	DEAD (Asp-Glu-Ala-Asp) box polypeptide 6	chr11:118620979-118620920	GO:0005515|GO:0008026|GO:0003724|GO:0016070|GO:0016071|GO:0010494|GO:0003723|GO:0004386|GO:0043928|GO:0003676|GO:0005524|GO:0016442|GO:0005829|GO:0005737|GO:0016787|GO:0000166|GO:0000932|GO:0000288	NM_004397	Hs.408461
A_23_P72668	0.00896061	1.48526	0.570712	1.48526	up	-4.70317	-2.23363	4.70317	down	-6.98542	-2.80435	6.98542	down	76.2541	81.6432	97.9567	80.9111	103.089	99.5967	198.349	87.1321	101.046	0	0.0914004	-1.69136	-0.555991	-0.881444	-1.87466	1.86152	2.09745	1.14196	SDPR	Homo sapiens serum deprivation response (SDPR), mRNA [NM_004657]	192700161	chr2	192700102	-	FALSE	hs|2q32.3	8436	NM_004657	serum deprivation response	chr2:192700161-192700102	GO:0005515|GO:0005737|GO:0005543|GO:0016020|GO:0005901|GO:0001786|GO:0005829	NM_004657	Hs.26530
A_24_P923757	0.0052522	-1.5192	-0.603309	1.5192	down	1.00743	0.0106803	1.00743	up	1.53049	0.613989	1.53049	up	275.727	194.472	375.31	314.21	346.021	451.045	383.402	300.338	346.115	0.0286255	-0.382128	0	0.418397	0.627852	0.410175	-0.230386	-0.126199	-0.0289592	ATF7IP	Homo sapiens activating transcription factor 7 interacting protein (ATF7IP), mRNA [NM_018179]	14577739	chr12	14577680	+	FALSE	hs|12p13.1	55729	NM_018179	activating transcription factor 7 interacting protein	chr12:14577680-14577739	GO:0006306|GO:0005515|GO:0005667|GO:0045898|GO:0044419|GO:0003714|GO:0005634|GO:0000122|GO:0045893|GO:0045892|GO:0016887	NM_018179	Hs.729180
A_24_P929246	0.00923212	2.27972	1.18886	2.27972	up	-3.55918	-1.83154	3.55918	down	-8.11392	-3.0204	8.11392	down	10.5216	9.44973	16.0723	16.5986	9.41414	6.90337	367.926	23.7427	19.0731	0	0.450364	-0.118357	-1.62898	-0.943793	-0.661789	0.738807	3.19215	1.89568			94610632	chr1	94610573	+	FALSE	hs|1p22.1				chr1:094610573-094610632
A_24_P418250	0.00925453	-1.15369	-0.206252	1.15369	down	1.6388	0.71264	1.6388	up	1.89066	0.918891	1.89066	up	272.087	312.377	495.565	382.476	429.578	530.262	338.638	242.943	298.534	-0.255989	0.0800558	0.0721269	0	0.145144	0.369805	-1.1176	-0.66674	-0.457382	NCRNA00086	Homo sapiens non-protein coding RNA 86 (NCRNA00086), non-coding RNA [NR_024359]	134559545	chrX	134559486	+	FALSE	hs|Xq26.3	399668	NR_024359	non-protein coding RNA 86	chrX:134559486-134559545		NR_024359	Hs.374414
A_32_P47643	0.00377918	2.41631	1.27281	2.41631	up	-3.14364	-1.65244	3.14364	down	-7.59603	-2.92524	7.59603	down	88.5781	89.3579	82.3039	100.037	84.7835	136.439	212.813	95.5124	112.043	0.0900123	0	-1.40253	-1.17923	-1.56738	-2.38433	1.3236	1.48157	0.839622	FAM110C	Homo sapiens family with sequence similarity 110, member C (FAM110C), mRNA [NM_001077710]	38915	chr2	38856	-	FALSE	hs|2p25.3	642273	NM_001077710	family with sequence similarity 110, member C	chr2:38915-38856	GO:0005737|GO:0000922|GO:0005815|GO:0005874|GO:0005856	NM_001077710	Hs.8379
A_24_P921050	0.00324364	-1.33655	-0.418514	1.33655	down	-3.12138	-1.64219	3.12138	down	-2.3354	-1.22367	2.3354	down	15.2133	12.891	25.1707	14.9624	13.5124	11.4041	138.83	24.6293	18.5247	-0.704956	-0.565581	0	-0.210144	0.43932	-0.244173	0.954511	1.15198	1.54952		Homo sapiens NCX1 exchanger mRNA, partial cds. [AF350419]	40512030	chr2	40511971	-	FALSE	hs|2p22.1		AF350419		chr2:40512030-40511971			Hs.684455
A_23_P51996	0.00283268	-1.14441	-0.194607	1.14441	down	1.63193	0.706578	1.63193	up	1.8676	0.901185	1.8676	up	1036.06	994.928	1509.39	1733.45	1373.19	1827.8	1715.85	867.805	1179.46	-0.0808678	0	0.384527	0.35531	0.302118	0.230053	-0.655396	-0.371713	-0.788965	STXBP3	Homo sapiens syntaxin binding protein 3 (STXBP3), mRNA [NM_007269]	109352043	chr1	109351984	+	FALSE	hs|1p13.3	6814	NM_007269	syntaxin binding protein 3	chr1:109351984-109352043	GO:0030347|GO:0019905|GO:0005515|GO:0005886|GO:0043312|GO:0042581|GO:0005730|GO:0030168|GO:0005634|GO:0015031|GO:0005829|GO:0006904|GO:0070527|GO:0016323|GO:0005737|GO:0016324|GO:0045955|GO:0007596|GO:0031091|GO:0070820|GO:0017075|GO:0016192	NM_007269	Hs.530436
A_23_P146997	0.00864018	-1.09215	-0.127174	1.09215	down	1.26899	0.343685	1.26899	up	1.38593	0.470859	1.38593	up	952.722	638.483	1082.04	1293.76	1042.87	1400.33	1692.65	802.56	1269.8	-0.0351591	0.069994	0	0.062585	0.0914011	0.262371	-0.135107	-0.478832	-0.382279	TXLNG	Homo sapiens taxilin gamma (TXLNG), transcript variant 1, mRNA [NM_018360]	16855753	chrX	16852460	+	FALSE	hs|Xp22.2	55787	NM_018360	taxilin gamma	chrX:16852460-16855753	GO:0031965|GO:0007049|GO:0006355|GO:0005737|GO:0016020|GO:0005634|GO:0005829	NM_018360	Hs.555961
A_24_P409230	0.0090215	-1.41679	-0.502625	1.41679	down	-3.0418	-1.60493	3.0418	down	-2.14697	-1.1023	2.14697	down	15.1299	20.8683	85.9078	38.4353	52.6405	53.0017	92.678	22.5234	19.3914	-0.794174	-0.575284	-0.130954	-0.0990937	0	0.106557	0.370877	1.41906	1.52443	OR10A2	Homo sapiens olfactory receptor, family 10, subfamily A, member 2 (OR10A2), mRNA [NM_001004460]	6891087	chr11	6891028	+	FALSE	hs|11p15.4	341276	NM_001004460	olfactory receptor, family 10, subfamily A, member 2	chr11:6891028-6891087	GO:0004984|GO:0005886|GO:0004930|GO:0004872|GO:0016021|GO:0050896	NM_001004460	Hs.371762
A_23_P132654	0.00893032	1.05788	0.0811716	1.05788	up	-2.87844	-1.52529	2.87844	down	-3.04503	-1.60646	3.04503	down	86.1197	117.505	172.119	158.281	153.778	162.427	1259.61	123.893	144.36	0	-0.315234	-0.588931	-0.54947	-0.631712	0.033502	1.9527	1.02209	0.696908	TLR9	Homo sapiens toll-like receptor 9 (TLR9), mRNA [NM_017442]	52255280	chr3	52255221	-	FALSE	hs|3p21.2	54106	NM_017442	toll-like receptor 9	chr3:52255280-52255221	GO:0005515|GO:0032755|GO:0032717|GO:0034123|GO:0032715|GO:0034122|GO:0046330|GO:0005764|GO:0032757|GO:0045078|GO:0043123|GO:0042742|GO:0032728|GO:0032760|GO:0032722|GO:0045359|GO:0008543|GO:0045087|GO:0045356|GO:0005789|GO:0010008|GO:0004888|GO:0008286|GO:0042346|GO:0005886|GO:0032733|GO:0005783|GO:0002237|GO:0032735|GO:0032009|GO:0016323|GO:0016324|GO:0005737|GO:0051092|GO:0030277|GO:0045944|GO:…	NM_017442	Hs.87968
A_24_P705701	0.00595746	-1.26035	-0.333827	1.26035	down	-4.79942	-2.26286	4.79942	down	-3.808	-1.92903	3.808	down	19.6788	18.6035	24.0818	12.5049	28.6089	17.3728	1186.84	27.1979	19.1051	-1.07081	-0.855163	0	-1.02085	-0.158487	0.254844	1.09124	1.69479	2.07658			100003856	chr6	100003797	+	FALSE	hs|6q16.2				chr6:100003797-100003856
A_23_P96369	0.00325254	2.06514	1.04624	2.06514	up	-4.37386	-2.12891	4.37386	down	-9.03262	-3.17515	9.03262	down	83.2137	91.8563	90.0842	85.0917	82.784	135.315	273.186	95.3227	106.011	0	0.0137844	-1.45728	-0.896904	-1.43265	-2.25265	1.92663	1.86452	1.15208	CXorf57	Homo sapiens chromosome X open reading frame 57 (CXorf57), transcript variant 1, mRNA [NM_018015]	105922576	chrX	105922517	+	FALSE	hs|Xq22.3	55086	NM_018015	chromosome X open reading frame 57	chrX:105922517-105922576		NM_018015	Hs.274267
A_24_P339611	0.00415724	1.09765	0.134422	1.09765	up	-1.39655	-0.481871	1.39655	down	-1.53293	-0.616293	1.53293	down	12626.4	11600	17058.8	14243	14053	18460.1	16019.5	15536.2	17056.3	0	-0.0219965	0.0856219	-0.0199909	-0.165418	-0.154233	0.326484	0.756275	0.426479	PDCD5	Homo sapiens programmed cell death 5 (PDCD5), mRNA [NM_004708]	33077782	chr19	33076773	+	FALSE	hs|19q13.11	9141	NM_004708	programmed cell death 5	chr19:33076773-33077782	GO:0005737|GO:0006915|GO:0005634|GO:0006917|GO:0003677	NM_004708	Hs.443831
A_24_P117138	0.00604183	-1.27749	-0.353316	1.27749	down	1.07445	0.103596	1.07445	up	1.3726	0.456912	1.3726	up	1406.41	1489.56	2694.63	2238.8	2597.63	2822.51	1843.2	1405.32	1782.18	0	-0.139518	0.0838805	0.320231	0.473178	0.210903	-0.0432614	-0.221445	-0.101719	ZNF626	Homo sapiens zinc finger protein 626 (ZNF626), transcript variant 2, mRNA [NM_145297]	20829118	chr19	20828560	-	FALSE	hs|19p12	199777	NM_145297	zinc finger protein 626	chr19:20829118-20828560	GO:0005622|GO:0006355|GO:0008270|GO:0005634|GO:0003676|GO:0003677|GO:0046872	NM_145297	Hs.657001
A_23_P131846	0.00384162	-1.19617	-0.25842	1.19617	down	1.35039	0.433374	1.35039	up	1.61529	0.691794	1.61529	up	1918.8	2076.26	2971.77	3003.93	3134.82	3543.3	2127.38	1139.85	1998.8	0.103617	-0.00318527	0	0.369479	0.343118	0.163095	-0.428042	-0.612039	-0.159611	SNAI1	Homo sapiens snail homolog 1 (Drosophila) (SNAI1), mRNA [NM_005985]	48605229	chr20	48605170	+	FALSE	hs|20q13.13	6615	NM_005985	snail homolog 1 (Drosophila)	chr20:48605170-48605229	GO:0005515|GO:0043066|GO:0030335|GO:0001707|GO:0060707|GO:0010718|GO:0005634|GO:0007275|GO:0060806|GO:0000122|GO:0001837|GO:0046872|GO:0001649|GO:0031069|GO:0043565|GO:0005622|GO:0005737|GO:0043518|GO:0008270|GO:0045893|GO:0019900|GO:0010957	NM_005985	Hs.48029
A_23_P344194	0.0032573	1.10567	0.144924	1.10567	up	3.19035	1.67372	3.19035	up	2.88544	1.52879	2.88544	up	70.0163	58.8856	95.8671	39.1287	83.215	98.7522	107.859	37.1924	27.5462	0	0.574399	0.788021	-0.0966184	0.329523	0.694745	-1.45163	-0.810948	-1.39615	C12orf68	Homo sapiens chromosome 12 open reading frame 68 (C12orf68), mRNA [NM_001013635]	48578943	chr12	48578884	+	FALSE	hs|12q13.11	387856	NM_001013635	chromosome 12 open reading frame 68	chr12:48578884-48578943	GO:0005737	NM_001013635	Hs.251699
(+)E1A_r60_a22	0.00927485	-1.77845	-0.83062	1.77845	down	-1.0686	-0.0957231	1.0686	down	1.66428	0.734897	1.66428	up	6203.85	5374.39	7416	12359.8	10673	11094.2	7021.55	5573.38	6374.27	-0.0997535	-0.358167	-0.162164	0.584159	0.917498	0.37012	-0.414033	0	0.0811185		Unknown					pos
A_23_P156198	0.00588029	-1.11059	-0.151321	1.11059	down	1.60004	0.678107	1.60004	up	1.77698	0.829428	1.77698	up	139.73	218.883	348.411	282.413	326.467	330.163	263.628	159.313	174.307	-0.278556	0.0932649	0.136264	0	0.111965	0.292971	-0.882884	-0.431693	-0.768772	PHF15	Homo sapiens PHD finger protein 15 (PHF15), mRNA [NM_015288]	133914933	chr5	133914874	+	FALSE	hs|5q31.1	23338	NM_015288	PHD finger protein 15	chr5:133914874-133914933	GO:0043981|GO:0043983|GO:0043982|GO:0043966|GO:0043984|GO:0000123|GO:0008270|GO:0046872	NM_015288	Hs.483419
A_23_P93623	0.00698286	-1.23176	-0.300722	1.23176	down	1.09162	0.126475	1.09162	up	1.34462	0.427198	1.34462	up	9453.89	10575.9	14409.3	15446.2	15037	13837.7	10976.8	9428.26	9400.51	-0.0351381	-0.0915327	0	0.250393	0.184017	0.341086	0.00967991	-0.214026	-0.30175	ATP6V1F	Homo sapiens ATPase, H+ transporting, lysosomal 14kDa, V1 subunit F (ATP6V1F), transcript variant 1, mRNA [NM_004231]	128505798	chr7	128505739	+	FALSE	hs|7q32.1	9296	NM_004231	ATPase, H+ transporting, lysosomal 14kDa, V1 subunit F	chr7:128505739-128505798	GO:0005515|GO:0008286|GO:0015078|GO:0016469|GO:0005624|GO:0033180|GO:0042625|GO:0042624|GO:0055085|GO:0005829|GO:0006879|GO:0033572|GO:0016020|GO:0046961|GO:0046933|GO:0015991|GO:0016471|GO:0006811|GO:0015992	NM_004231	Hs.78089
A_23_P24104	2.02594e-05	-8.31328	-3.05542	8.31328	down	-1.264	-0.337996	1.264	down	6.57696	2.71742	6.57696	up	1317.29	1725.18	2822.1	5525.04	8335.21	8768.41	1757.76	1537.67	1661.26	-0.544177	-0.73931	0	2.43143	2.8011	2.65024	0.104263	-0.349014	-0.024747	PLAU	Homo sapiens plasminogen activator, urokinase (PLAU), transcript variant 1, mRNA [NM_002658]	75677109	chr10	75677050	+	FALSE	hs|10q22.2	5328	NM_002658	plasminogen activator, urokinase	chr10:75677050-75677109	GO:0033628|GO:0001666|GO:0010469|GO:0004252|GO:0005886|GO:0009986|GO:0007566|GO:0014910|GO:0005576|GO:2000097|GO:0001525|GO:0005615|GO:0061041|GO:0007165|GO:0006935|GO:0007596|GO:0042127|GO:0055093|GO:0006508|GO:0043403|GO:0008233|GO:0042730	NM_002658	Hs.77274
A_24_P578437	0.0013316	1.48281	0.568337	1.48281	up	-3.09382	-1.62939	3.09382	down	-4.58756	-2.19773	4.58756	down	20.0812	31.3077	43.7383	27.8322	35.0267	26.9611	463.959	38.7646	28.4597	0	-0.811348	0.136778	-0.905715	-0.946309	-0.527557	1.72001	0.943547	1.55005			43390379	chr4	43390320	+	FALSE	hs|4p13				chr4:043390320-043390379
A_24_P471242	0.00715079	-2.60577	-1.38171	2.60577	down	-2.53184	-1.34019	2.53184	down	1.0292	0.0415208	1.0292	up	254.54	444.519	627.809	546.294	580.874	608.688	485.02	365.851	289.313	-1.10425	-1.35503	-1.15439	0.0145538	0.230664	0.286237	0.828178	0	-0.421285							FALSE
A_23_P111995	0.00702333	-1.89136	-0.919423	1.89136	down	-1.43633	-0.522391	1.43633	down	1.3168	0.397032	1.3168	up	3303.63	3631.88	4905.2	4517.03	4988.43	7500.77	4725.87	3282.55	3889.1	-0.17171	-0.567214	-0.689817	0.194615	0.481702	0.653212	0.219224	-0.0807915	0	LOXL2	Homo sapiens lysyl oxidase-like 2 (LOXL2), mRNA [NM_002318]	23154845	chr8	23154786	-	FALSE	hs|8p21.3	4017	NM_002318	lysyl oxidase-like 2	chr8:23154845-23154786	GO:0016641|GO:0016020|GO:0005507|GO:0007568|GO:0016491|GO:0009055|GO:0005576|GO:0007155|GO:0005615|GO:0046872|GO:0006464|GO:0005044	NM_002318	Hs.626637
A_23_P55251	0.000109166	-3.06418	-1.6155	3.06418	down	1.08459	0.117149	1.08459	up	3.32338	1.73265	3.32338	up	283.198	449.818	723.491	763.297	1022.27	866.219	504.359	343.84	375.498	-0.325153	0	0.0845919	1.30505	1.50421	1.79668	-0.0300069	-0.170384	-0.391618	ITGA3	Homo sapiens integrin, alpha 3 (antigen CD49C, alpha 3 subunit of VLA-3 receptor) (ITGA3), transcript variant a, mRNA [NM_002204]	48167424	chr17	48167365	+	FALSE	hs|17q21.33	3675	NM_002204	integrin, alpha 3 (antigen CD49C, alpha 3 subunit of VLA-3 receptor)	chr17:48167365-48167424	GO:0005515|GO:0008305|GO:0005886|GO:0009986|GO:0050900|GO:0016323|GO:0007160|GO:0007229|GO:0007596|GO:0004872|GO:0007613|GO:0016021|GO:0019717|GO:0001764|GO:0007155	NM_002204	Hs.265829
A_24_P234871	0.00659765	-1.95905	-0.970155	1.95905	down	1.02005	0.0286335	1.02005	up	1.99832	0.998789	1.99832	up	799.814	707.275	1095.34	1053.96	1141.19	1727.89	1101.98	811.422	902.837	0.0832462	-0.421779	-0.246639	0.450043	0.86227	1.01298	-0.524405	0	-0.146668			153800548	chr5	153800489	+	FALSE	hs|5q33.2				chr5:153800489-153800548
A_24_P158089	0.00280855	-4.29805	-2.10368	4.29805	down	-1.33547	-0.417349	1.33547	down	3.21837	1.68633	3.21837	up	94.9186	115.773	326.419	226.913	619.39	592.017	216.835	124.202	94	-0.588147	-0.420931	0	1.38184	1.93784	1.98228	0.784685	-0.0806813	-0.461036	SERPINE1	Homo sapiens serpin peptidase inhibitor, clade E (nexin, plasminogen activator inhibitor type 1), member 1 (SERPINE1), transcript variant 1, mRNA [NM_000602]	100781614	chr7	100781555	+	FALSE	hs|7q22.1	5054	NM_000602	serpin peptidase inhibitor, clade E (nexin, plasminogen activator inhibitor type 1), member 1	chr7:100781555-100781614	GO:0033629|GO:0005515|GO:0043627|GO:0035491|GO:0010469|GO:0005886|GO:0004867|GO:2000098|GO:0042246|GO:0002020|GO:0005615|GO:0014912|GO:0032757|GO:0061044|GO:0071258|GO:0061045|GO:0031093|GO:0034097|GO:0043066|GO:0030336|GO:0005102|GO:0051918|GO:0030168|GO:0051384|GO:0005625|GO:0005576|GO:0070887|GO:0042593|GO:0001525|GO:0030414|GO:0045766|GO:0010951|GO:0031012|GO:0050829|GO:0071222|GO:0007596|GO:…	NM_000602	Hs.414795
A_23_P168306	0.00223486	1.10727	0.147011	1.10727	up	1.57247	0.653034	1.57247	up	1.42013	0.506023	1.42013	up	2642.11	2585.53	3704.33	3265.63	2865.66	4615.32	3127.94	1856.44	2278.31	0.0146732	0.362786	0.279933	-0.00157952	0	0.217939	-0.464003	-0.361785	-0.475923	WASF1	Homo sapiens WAS protein family, member 1 (WASF1), transcript variant 1, mRNA [NM_003931]	110421185	chr6	110421126	-	FALSE	hs|6q21	8936	NM_003931	WAS protein family, member 1	chr6:110421185-110421126	GO:0005739|GO:0005737|GO:0006461|GO:0030041|GO:0006928|GO:0005741|GO:0003779|GO:0015629|GO:0005856|GO:0030027	NM_003931	Hs.75850
A_24_P237778	0.00197971	1.24093	0.311421	1.24093	up	-2.88311	-1.52762	2.88311	down	-3.57773	-1.83905	3.57773	down	18.0997	15.7517	19.085	9.44878	20.7372	17.9667	191.971	28.3727	25.5177	-0.274101	0	-0.100617	0.121498	-0.493603	-0.936876	1.01478	1.64905	1.54433	MAN1C1	Homo sapiens mannosidase, alpha, class 1C, member 1 (MAN1C1), mRNA [NM_020379]	26098263	chr1	26098204	+	FALSE	hs|1p36.11	57134	NM_020379	mannosidase, alpha, class 1C, member 1	chr1:26098204-26098263	GO:0005794|GO:0004571|GO:0005509|GO:0030173|GO:0000139|GO:0016020|GO:0016798|GO:0008152|GO:0006487|GO:0016021|GO:0044267|GO:0018279|GO:0043687	NM_020379	Hs.197043
A_23_P43490	0.0017546	-1.21181	-0.277166	1.21181	down	1.24889	0.320646	1.24889	up	1.51342	0.597812	1.51342	up	2887.7	2482.05	4184.2	4889.42	4452.81	4368.35	3433.58	2637.29	3150.76	-0.188596	0	0.0434971	0.160688	0.248061	0.277649	-0.522193	-0.274832	-0.310012	CDKN2A	Homo sapiens cyclin-dependent kinase inhibitor 2A (melanoma, p16, inhibits CDK4) (CDKN2A), transcript variant 3, mRNA [NM_058197]	21968098	chr9	21968039	-	FALSE	hs|9p21.3	1029	NM_058197	cyclin-dependent kinase inhibitor 2A (melanoma, p16, inhibits CDK4)	chr9:21968098-21968039	GO:0005515|GO:0033088|GO:0030308|GO:0001652|GO:0006364|GO:0009303|GO:0071158|GO:0070534|GO:0008637|GO:0051444|GO:0055105|GO:0000209|GO:0019901|GO:0010389|GO:0030889|GO:0043234|GO:0008544|GO:0000075|GO:0005654|GO:0090399|GO:0000278|GO:0045893|GO:0090398|GO:0008134|GO:0001953|GO:0048103|GO:0008285|GO:0045736|GO:0007265|GO:0005634|GO:0005829|GO:0031648|GO:0002039|GO:0051091|GO:0005737|GO:0000082|GO:…	NM_058197	Hs.512599
A_23_P166100	0.00289278	-1.18912	-0.249899	1.18912	down	1.3502	0.433169	1.3502	up	1.60555	0.683068	1.60555	up	2233.76	1931.93	2777.38	3642.83	2941.37	3845.67	2723.98	1872.91	2338.99	-0.00110054	0.134254	0	0.315834	0.223407	0.343609	-0.519559	-0.131834	-0.514961	TMX4	Homo sapiens thioredoxin-related transmembrane protein 4 (TMX4), mRNA [NM_021156]	7961977	chr20	7961918	-	FALSE	hs|20p12.3	56255	NM_021156	thioredoxin-related transmembrane protein 4	chr20:7961977-7961918	GO:0016020|GO:0006810|GO:0045454|GO:0016021|GO:0022900	NM_021156	Hs.169358
A_32_P14178	0.00972345	1.42256	0.508493	1.42256	up	-2.5879	-1.37178	2.5879	down	-3.68146	-1.88028	3.68146	down	17.5955	9.68236	8.59951	10.5811	9.37881	5.89462	1143.09	28.506	24.7211	0	1.03702	-0.439993	-0.165654	-0.755936	-0.00686291	1.79523	1.42096	1.49619	PLG	Homo sapiens plasminogen (PLG), transcript variant 1, mRNA [NM_000301]	161175026	chr6	161174967	+	FALSE	hs|6q26	5340	NM_000301	plasminogen	chr6:161174967-161175026	GO:0005515|GO:0043498|GO:0048771|GO:0008285|GO:0004252|GO:0005886|GO:0051919|GO:0010812|GO:0051918|GO:0030168|GO:0005576|GO:0031232|GO:0005615|GO:0022617|GO:0007596|GO:0002576|GO:0006508|GO:0031093|GO:0008233|GO:0034185|GO:0042730	NM_000301	Hs.143436
A_23_P140675	0.00852203	-1.22631	-0.29433	1.22631	down	-2.21998	-1.15055	2.21998	down	-1.81028	-0.856217	1.81028	down	18.3959	20.2974	39.5105	33.558	29.2439	20.8907	365.829	32.9718	28.6304	-0.397598	-0.757528	0	0.310317	-0.3484	-0.234054	0.824078	0.66504	0.807396	EPB42	Homo sapiens erythrocyte membrane protein band 4.2 (EPB42), transcript variant 1, mRNA [NM_000119]	43489565	chr15	43489506	-	FALSE	hs|15q15.2	2038	NM_000119	erythrocyte membrane protein band 4.2	chr15:43489565-43489506	GO:0005515|GO:0005737|GO:0043249|GO:0018149|GO:0005886|GO:0008360|GO:0003810|GO:0005200|GO:0005856|GO:0005524	NM_000119	Hs.368642
A_23_P385690	0.0029286	-1.28441	-0.361106	1.28441	down	-3.37202	-1.75361	3.37202	down	-2.62535	-1.39251	2.62535	down	23.2114	26.664	48.7736	27.1865	37.1314	33.3691	744.587	28.7129	28.8789	-0.755459	-1.01333	0.163334	-0.330017	0	-0.192116	1.27321	1.3223	1.05988	WNT3A	Homo sapiens wingless-type MMTV integration site family, member 3A (WNT3A), mRNA [NM_033131]	228248952	chr1	228248893	+	FALSE	hs|1q42.13	89780	NM_033131	wingless-type MMTV integration site family, member 3A	chr1:228248893-228248952	GO:0005515|GO:0009798|GO:0045599|GO:0001756|GO:0048843|GO:0030879|GO:0007409|GO:0005110|GO:0005615|GO:0009653|GO:0007223|GO:0001947|GO:0005109|GO:0009880|GO:0007411|GO:0030198|GO:0016055|GO:0048018|GO:0042472|GO:0009986|GO:0010387|GO:0003713|GO:0019904|GO:0007275|GO:0021874|GO:0001701|GO:0001649|GO:0043280|GO:0061054|GO:0048697|GO:0003136|GO:0010977|GO:0030917|GO:0045595|GO:0045121|GO:0048343|GO:…	NM_033131	Hs.336930
A_23_P80759	0.00213385	1.22681	0.294915	1.22681	up	2.45832	1.29768	2.45832	up	2.00383	1.00276	2.00383	up	133.492	161.059	213.973	196.46	178.99	242.915	238.842	114.622	153.977	0.312231	0.161309	0.586682	0.228763	-0.0532858	0	-1.16024	-0.518179	-1.15439	PVRL3	poliovirus receptor-related 3 [Source:HGNC Symbol;Acc:17664] [ENST00000485303]	110853719	chr3	110853660	+	FALSE	hs|3q13.13	25945	BC017572	poliovirus receptor-related 3	chr3:110853660-110853719	GO:0005515|GO:0005886|GO:0034329|GO:0060042|GO:0042803|GO:0045216|GO:0009566|GO:0043296|GO:0005913|GO:0002089|GO:0016021|GO:0007156|GO:0050839|GO:0034332		Hs.293917
A_24_P286465	0.000914067	1.00325	0.00468128	1.00325	up	1.48263	0.568158	1.48263	up	1.47783	0.563477	1.47783	up	1539.84	1754.04	2718.5	2484.97	2493.53	2719.11	1972.79	1419.22	1709.64	0.109757	-0.0836087	0.228775	0	0.0676164	0.173263	-0.53367	-0.462147	-0.453733	PURB	Homo sapiens purine-rich element binding protein B (PURB), mRNA [NM_033224]	44916101	chr7	44916042	-	FALSE	hs|7p13	5814	NM_033224	purine-rich element binding protein B	chr7:44916101-44916042	GO:0006355|GO:0003697|GO:0045637|GO:0005634|GO:0032422|GO:0003729|GO:0005662|GO:0003677|GO:0008134|GO:0000900	NM_033224	Hs.728785
A_23_P43369	7.68756e-05	-1.19024	-0.251248	1.19024	down	-4.00944	-2.0034	4.00944	down	-3.36861	-1.75215	3.36861	down	43.5375	53.1609	80.4362	38.6231	63.7784	65.0337	211.891	60.7306	49.9942	-0.123891	-0.283366	-0.440809	0.204547	-0.298869	0	2.02139	1.61129	1.52945	SIT1	Homo sapiens signaling threshold regulating transmembrane adaptor 1 (SIT1), mRNA [NM_014450]	35649748	chr9	35649689	-	FALSE	hs|9p13.3	27240	NM_014450	signaling threshold regulating transmembrane adaptor 1	chr9:35649748-35649689	GO:0005515|GO:0007165|GO:0050863|GO:0005886|GO:0005887|GO:0019900|GO:0042169	NM_014450	Hs.88012
A_23_P5392	0.0054804	-1.3365	-0.41846	1.3365	down	1.16365	0.218655	1.16365	up	1.55522	0.637115	1.55522	up	891.946	1083.8	1738.27	1337.38	1778.13	2029.46	1284.31	833.825	993.244	-0.0158452	0	0.198875	0.390831	0.590092	0.457487	-0.00212851	-0.3921	-0.0787066	TP53I3	Homo sapiens tumor protein p53 inducible protein 3 (TP53I3), transcript variant 1, mRNA [NM_004881]	24302356	chr2	24300615	-	FALSE	hs|2p23.3	9540	NM_004881	tumor protein p53 inducible protein 3	chr2:24302356-24300615	GO:0048038|GO:0005488|GO:0008631|GO:0016491|GO:0008270|GO:0006739|GO:0005575|GO:0003960|GO:0070402|GO:0042803	NM_004881	Hs.50649
A_24_P156388	0.000753691	1.05407	0.075968	1.05407	up	-1.40554	-0.491129	1.40554	down	-1.48154	-0.567097	1.48154	down	293.453	254.535	398.649	233.371	333.135	554.788	1294.51	372.313	356.029	0	0.104069	-0.120173	-0.0570469	-0.0745331	-0.112428	0.603058	0.496023	0.358201	TTC38	Homo sapiens tetratricopeptide repeat domain 38 (TTC38), mRNA [NM_017931]	46689256	chr22	46689197	+	FALSE	hs|22q13.31	55020	NM_017931	tetratricopeptide repeat domain 38	chr22:46689197-46689256	GO:0005488	NM_017931	Hs.435832
A_32_P116233	0.00452623	1.76941	0.823266	1.76941	up	-3.49632	-1.80584	3.49632	down	-6.18642	-2.6291	6.18642	down	16.9949	14.2629	12.9787	15.2855	10.2729	14.3034	142.074	25.1837	20.7915	0	0.0781652	-1.26157	-0.935925	-0.949079	-1.7682	0.797977	1.73881	1.69732			94747313	chr14	94747254	-	FALSE	hs|14q32.13				chr14:094747313-094747254
A_24_P941006	0.00173897	-1.62473	-0.700201	1.62473	down	-2.80554	-1.48828	2.80554	down	-1.72677	-0.788079	1.72677	down	18.5246	25.9938	77.1221	48.3621	54.468	40.5845	201.298	25.279	22.3458	-0.901859	-0.686026	-0.322667	0.343739	-0.153686	0	0.532083	0.993642	1.02856	C2orf19	Homo sapiens chromosome 2 open reading frame 19, mRNA (cDNA clone IMAGE:4830090). [BC031945]	239062319	chr2	239062260	-	FALSE	hs|2q37.3	394261	BC031945	chromosome 2 open reading frame 19	chr2:239062319-239062260
A_24_P194962	0.0024659	-1.01558	-0.0223102	1.01558	down	-1.22343	-0.29093	1.22343	down	-1.20465	-0.26862	1.20465	down	83863.7	88154	97362.1	81926.2	93244.4	128526	89929.5	84270.7	97629.8	0	-0.141168	-0.147474	-0.103727	-0.1259	0.00791565	0.20775	0.180386	0.196011			88390851	chr10	88390792	-	FALSE	hs|10q23.2				chr10:088390851-088390792
A_23_P301925	0.00913831	-1.64181	-0.715291	1.64181	down	1.27529	0.350831	1.27529	up	2.0938	1.06612	2.0938	up	126566	140188	155292	183774	192925	264254	115299	138751	161421	-0.390614	0.319681	0	0.854008	0.724838	0.496096	-0.589107	-0.467558	-0.066759	COX1	mitochondrially encoded cytochrome c oxidase I [Source:HGNC Symbol;Acc:7419] [ENST00000361624]	567626	chr1	567567	+	FALSE	hs|1p36.33	4512	CR606568	cytochrome c oxidase subunit I	chr1:567567-567626	GO:0005515|GO:0070469|GO:0004129|GO:0007568|GO:0005743|GO:0009055|GO:0021549|GO:0046872|GO:0022904|GO:0005739|GO:0009060|GO:0016020|GO:0006123|GO:0051602|GO:0006810|GO:0016491|GO:0016021|GO:0046688|GO:0022900|GO:0006979|GO:0020037
A_32_P212520	9.69172e-05	-1.17342	-0.230717	1.17342	down	1.87295	0.905309	1.87295	up	2.19775	1.13603	2.19775	up	148.62	186.891	262.819	177.489	244.437	330.117	203.149	137.299	157.699	0.242152	-0.0500661	0	0.200795	0.414962	0.26848	-0.95471	-0.862165	-0.706966	HOOK3	Homo sapiens hook homolog 3 (Drosophila) (HOOK3), mRNA [NM_032410]	42875534	chr8	42875475	+	FALSE	hs|8p11.21	84376	NM_032410	hook homolog 3 (Drosophila)	chr8:42875475-42875534	GO:0005515|GO:0008017|GO:0005801|GO:0030897|GO:0005813|GO:0005794|GO:0034453|GO:0005874|GO:0008333|GO:0031122|GO:0045022|GO:0015031|GO:0042802|GO:0005737|GO:0050768|GO:0022027|GO:0071539|GO:0007032|GO:0005856|GO:0051645|GO:0000242|GO:0007040|GO:0070695	NM_032410	Hs.162852
A_24_P222758	0.000824721	-1.15562	-0.208665	1.15562	down	1.56273	0.644069	1.56273	up	1.80592	0.852734	1.80592	up	509.026	647.728	948.153	792.323	918.081	952.318	627.078	516.679	592.243	0	0.0723506	-0.0998431	0.179579	0.193834	0.225089	-0.863279	-0.690455	-0.405966	DFFA	Homo sapiens DNA fragmentation factor, 45kDa, alpha polypeptide (DFFA), transcript variant 1, mRNA [NM_004401]	10523148	chr1	10521734	-	FALSE	hs|1p36.22	1676	NM_004401	DNA fragmentation factor, 45kDa, alpha polypeptide	chr1:10523148-10521734	GO:0005515|GO:0043066|GO:0005886|GO:0006915|GO:0005634|GO:0006917|GO:0006921|GO:0042802|GO:0005829|GO:0035556|GO:0005622|GO:0005739|GO:0004536|GO:0005737|GO:0006309|GO:0005654	NM_004401	Hs.484782
A_23_P118536	0.00076532	-1.05066	-0.0712909	1.05066	down	-4.43333	-2.14839	4.43333	down	-4.21958	-2.0771	4.21958	down	44.0406	54.0845	52.3925	39.0795	46.8336	70.1127	271.9	53.8403	49.7314	-0.316984	-0.459524	-0.348784	-0.991432	0	0.0800128	1.98786	1.89717	1.43485	SLFN12	Homo sapiens schlafen family member 12 (SLFN12), mRNA [NM_018042]	33738460	chr17	33738401	-	FALSE	hs|17q12	55106	NM_018042	schlafen family member 12	chr17:33738460-33738401	GO:0005524	NM_018042	Hs.663548
A_24_P814749	0.00805098	1.15341	0.205903	1.15341	up	-4.39149	-2.13471	4.39149	down	-5.06518	-2.34061	5.06518	down	26.6579	24.5321	23.1194	22.0257	20.1736	18.1345	542.1	34.8858	35.3909	0.00211191	0	-1.51634	-0.469767	-1.40844	-0.253733	2.01594	1.52059	1.35337		AGENCOURT_10624018 NIH_MGC_107 Homo sapiens cDNA clone IMAGE:6730528 5', mRNA sequence [BU956773]	201979299	chr1	201979240	-	FALSE	hs|1q32.1		BU956773		chr1:201979299-201979240			Hs.661033
A_23_P351320	0.00320629	-1.29587	-0.373924	1.29587	down	1.91789	0.939523	1.91789	up	2.48535	1.31345	2.48535	up	192.686	136.24	299.646	364.071	323.445	282.596	387.089	178.118	254.762	0	-0.119202	0.664344	0.443936	0.561308	0.661669	-0.506287	-0.890417	-0.876722	CDC40	Homo sapiens cell division cycle 40 homolog (S. cerevisiae) (CDC40), mRNA [NM_015891]	110550094	chr6	110550035	+	FALSE	hs|6q21	51362	NM_015891	cell division cycle 40 homolog (S. cerevisiae)	chr6:110550035-110550094	GO:0008380|GO:0010467|GO:0006369|GO:0006406|GO:0006366|GO:0000398|GO:0031124|GO:0005681|GO:0005654|GO:0005634|GO:0071013|GO:0051301	NM_015891	Hs.428147
A_23_P409945	0.00676304	-1.11849	-0.161548	1.11849	down	-1.24851	-0.320212	1.24851	down	-1.11625	-0.158663	1.11625	down	37001.7	32699.2	46867	36505.2	39038.2	57534.8	40960.9	36299.7	42779.9	-0.110521	-0.308857	-0.172207	-0.131927	0	0.0249873	0.140432	0.131523	0.0970955	OAZ1	Homo sapiens ornithine decarboxylase antizyme 1 (OAZ1), mRNA [NM_004152]	2273288	chr19	2273229	+	FALSE	hs|19p13.3	4946	NM_004152	ornithine decarboxylase antizyme 1	chr19:2273229-2273288	GO:0034641|GO:0008073|GO:0006596|GO:0006521|GO:0005829	NM_004152	Hs.446427
A_23_P167182	0.00669243	1.96996	0.978167	1.96996	up	-3.05377	-1.61059	3.05377	down	-6.0158	-2.58876	6.0158	down	11.352	9.38601	7.431	8.71732	9.85493	9.44614	71.4509	26.3601	20.3128	0	0.527226	-0.606904	-0.231705	-1.32121	-1.46126	0.845937	1.8718	2.03435	LRAT	Homo sapiens lecithin retinol acyltransferase (phosphatidylcholine--retinol O-acyltransferase) (LRAT), mRNA [NM_004744]	155671640	chr4	155671581	+	FALSE	hs|4q32.1	9227	NM_004744	lecithin retinol acyltransferase (phosphatidylcholine--retinol O-acyltransferase)	chr4:155671581-155671640	GO:0005791|GO:0047173|GO:0048471|GO:0005771|GO:0001523|GO:0005737|GO:0016020|GO:0005789|GO:0016021|GO:0007601|GO:0050896|GO:0008202|GO:0016740|GO:0005768|GO:0008415	NM_004744	Hs.658427
A_23_P62081	0.00165518	-1.80346	-0.850764	1.80346	down	1.34688	0.429622	1.34688	up	2.42904	1.28039	2.42904	up	674.266	740.585	1145.71	1241.07	1320.01	1752.12	822.049	638.069	728.663	-0.214004	0	0.293746	0.78215	0.961812	0.888072	-0.758496	-0.170502	-0.280126	SCG5	Homo sapiens secretogranin V (7B2 protein) (SCG5), transcript variant 2, mRNA [NM_003020]	32989165	chr15	32989106	+	FALSE	hs|15q13.3	6447	NM_003020	secretogranin V (7B2 protein)	chr15:32989106-32989165	GO:0005515|GO:0004857|GO:0016486|GO:0007218|GO:0046883|GO:0006810|GO:0005576|GO:0051082|GO:0030141|GO:0005525|GO:0043086|GO:0006886	NM_003020	Hs.156540
A_24_P170295	0.000399741	-1.24007	-0.310416	1.24007	down	1.14909	0.200496	1.14909	up	1.42495	0.510912	1.42495	up	1801.39	2278.8	3984.33	3475.04	3843.19	3522.47	2481.77	2430.21	2536.43	-0.111667	0.0321797	0	0.274413	0.296456	0.280891	-0.286242	-0.111647	-0.283086	HSP90AB1	Homo sapiens heat shock protein 90kDa alpha (cytosolic), class B member 1 (HSP90AB1), mRNA [NM_007355]	44217508	chr6	44217449	+	FALSE	hs|6p21.1	3326	NM_007355	heat shock protein 90kDa alpha (cytosolic), class B member 1	chr6:44217449-44217508	GO:0005515|GO:0006986|GO:0009651|GO:0031526|GO:0032435|GO:0045429|GO:0005829|GO:0060334|GO:0005739|GO:0005622|GO:0016323|GO:0005737|GO:0016324|GO:0060338|GO:0000166|GO:0008180|GO:0006457|GO:0007411|GO:0030235|GO:0042470|GO:0030911|GO:0032564|GO:0005625|GO:0001890|GO:0005525|GO:0005524|GO:0002135|GO:0002134|GO:0071407|GO:0051082	NM_007355	Hs.509736
A_23_P207520	1.52469e-05	-2.40848	-1.26813	2.40848	down	-1.27472	-0.35018	1.27472	down	1.88942	0.917945	1.88942	up	420.739	537.25	835.698	876.37	1092.15	1111.1	689.765	471.614	529.107	-0.166385	-0.391744	-0.398451	0.843208	1.0037	1.00089	-0.0310936	0	0.125054	COL1A1	H.sapiens mRNA for prepro-alpha1(I) collagen. [Z74615]	48261626	chr17	48261565	-	FALSE	hs|17q21.33	1277	Z74615	collagen, type I, alpha 1	chr17:48261626-48261565	GO:0005515|GO:0042542|GO:0034504|GO:0005581|GO:0034505|GO:0005886|GO:0071300|GO:0007605|GO:0090263|GO:0048706|GO:0010718|GO:0010812|GO:0043434|GO:0050900|GO:0015031|GO:0051591|GO:0005615|GO:0042802|GO:0005584|GO:0070208|GO:0005737|GO:0010035|GO:0007411|GO:0060351|GO:0030199|GO:0030335|GO:0001568|GO:0048407|GO:0007584|GO:0031960|GO:0030168|GO:0005576|GO:0001649|GO:0009612|GO:0031012|GO:0001958|GO:…		Hs.172928
A_23_P389987	0.00967411	-1.24962	-0.321484	1.24962	down	1.42784	0.513834	1.42784	up	1.78425	0.835318	1.78425	up	8318.66	7807.99	14185.9	17363.5	19309.8	14751.1	9885.01	3877.8	9702.88	-0.404416	0	0.254257	0.0756814	0.357452	0.38116	-0.547091	-0.641367	-0.503202	TLX2	Homo sapiens T-cell leukemia homeobox 2 (TLX2), mRNA [NM_016170]	74743863	chr2	74743804	+	FALSE	hs|2p13.1	3196	NM_016170	T-cell leukemia homeobox 2	chr2:74743804-74743863	GO:0043565|GO:0008150|GO:0003674|GO:0005737|GO:0003700|GO:0001707|GO:0050774|GO:0007275|GO:0005634|GO:0005575|GO:0048484	NM_016170	Hs.168586
A_24_P728215	0.00179304	-1.3584	-0.441905	1.3584	down	-2.40498	-1.26603	2.40498	down	-1.77046	-0.824121	1.77046	down	17.0851	10.4578	45.5703	34.0383	35.4591	28.2964	540.987	24.0166	18.0547	-0.905678	-0.254397	-0.150657	-0.0159335	0.0309173	0	0.793667	0.894591	0.799087	LOC100131117	Homo sapiens hypothetical LOC100131117 (LOC100131117), non-coding RNA [NR_038993]	114107783	chr3	114107724	+	FALSE	hs|3q13.31	100131117	NR_038993	hypothetical LOC100131117	chr3:114107724-114107783		NR_038993	Hs.122417
A_24_P594683	0.00155038	-1.10027	-0.137856	1.10027	down	1.61757	0.693828	1.61757	up	1.77976	0.831684	1.77976	up	2106.31	4430.09	7445.31	6312.47	6431.05	5314.15	2602.68	2288.96	2789.97	-0.0989388	0	0.312405	0.401943	0.148684	0.0764056	-0.671968	-0.627553	-0.568499	LOC100505998	PREDICTED: Homo sapiens hypothetical LOC100505998 (LOC100505998), partial miscRNA [XR_110458]	115242676	chr10	115242617	+	FALSE	hs|10q25.3	100505998	XR_110458	hypothetical LOC100505998	chr10:115242617-115242676		XR_110458
A_24_P124567	0.00977203	-1.34031	-0.422566	1.34031	down	1.89904	0.925268	1.89904	up	2.5453	1.34783	2.5453	up	114.703	87.2961	186.956	206.45	199.579	153.581	193.259	116.271	106.035	0	-0.262955	0.489998	0.434347	0.277409	0.782987	-0.76069	-0.483229	-1.30484	ORMDL2	Homo sapiens ORM1-like 2 (S. cerevisiae) (ORMDL2), mRNA [NM_014182]	56214590	chr12	56214531	+	FALSE	hs|12q13.2	29095	NM_014182	ORM1-like 2 (S. cerevisiae)	chr12:56214531-56214590	GO:0016020|GO:0005783|GO:0006672|GO:0005789|GO:0016021	NM_014182	Hs.534450
A_23_P155316	0.00249308	-1.09923	-0.136497	1.09923	down	1.33488	0.41671	1.33488	up	1.46734	0.553206	1.46734	up	1816.47	1745.25	2790.03	2588.67	2313.9	2892.2	2485.92	1766.33	2139.69	0	-0.030486	0.23236	0.132463	0.2443	0.234601	-0.407	-0.21067	-0.430584	NCBP2	Homo sapiens nuclear cap binding protein subunit 2, 20kDa (NCBP2), transcript variant 1, mRNA [NM_007362]	196663809	chr3	196663750	-	FALSE	hs|3q29	22916	NM_007362	nuclear cap binding protein subunit 2, 20kDa	chr3:196663809-196663750	GO:0005515|GO:0000339|GO:0008380|GO:0006369|GO:0010467|GO:0006368|GO:0006366|GO:0003723|GO:0031124|GO:0005634|GO:0031047|GO:0005829|GO:0005737|GO:0006406|GO:0000184|GO:0000166|GO:0006408|GO:0006810|GO:0016032|GO:0000340|GO:0006397|GO:0016070|GO:0008334|GO:0006370|GO:0034660|GO:0000387|GO:0050434|GO:0000398|GO:0006446|GO:0005654|GO:0046833|GO:0005845	NM_007362	Hs.591671
A_32_P737256	0.00649738	1.55616	0.637988	1.55616	up	-2.76548	-1.46753	2.76548	down	-4.30352	-2.10552	4.30352	down	16.006	14.0559	11.5905	14.83	10.5328	15.3112	107.9	23.9967	19.3243	0	0.233925	-0.802058	-0.56084	-0.564696	-1.35656	0.735692	1.82556	1.2732	NCRNA00310	Homo sapiens non-protein coding RNA 310 (NCRNA00310), transcript variant 2, non-coding RNA [NR_027267]	35555439	chr21	35555380	+	FALSE	hs|21q22.11	114036	NR_027267	non-protein coding RNA 310	chr21:35555380-35555439		NR_027267	Hs.720230
A_23_P211850	0.00670807	-1.09984	-0.1373	1.09984	down	1.60555	0.683065	1.60555	up	1.76585	0.820366	1.76585	up	743.262	742.615	1079.8	1027.46	977.522	1458.13	1027.8	657.442	776.367	-0.405931	0.174725	0.00230497	0.0394344	0	0.143566	-0.986982	-0.608886	-0.682228	ABHD6	Homo sapiens abhydrolase domain containing 6 (ABHD6), mRNA [NM_020676]	58280350	chr3	58280291	+	FALSE	hs|3p14.3	57406	NM_020676	abhydrolase domain containing 6	chr3:58280291-58280350	GO:0005739|GO:0030336|GO:0016787|GO:0016020|GO:0047372|GO:0060292|GO:0016021|GO:2000124	NM_020676	Hs.476454
A_23_P212469	0.000642855	1.37747	0.462017	1.37747	up	-2.46002	-1.29867	2.46002	down	-3.3886	-1.76069	3.3886	down	12.7958	10.1748	22.4322	8.9405	7.91429	19.8291	1158.67	22.0144	20.2858	-0.0825335	0.166008	0	-0.426063	-0.283281	-0.593232	0.847834	1.41021	1.72144	ENTPD3	Homo sapiens ectonucleoside triphosphate diphosphohydrolase 3 (ENTPD3), mRNA [NM_001248]	40469954	chr3	40469895	+	FALSE	hs|3p22.1	956	NM_001248	ectonucleoside triphosphate diphosphohydrolase 3	chr3:40469895-40469954	GO:0016787|GO:0016020|GO:0000166|GO:0016021|GO:0005524	NM_001248	Hs.441145
A_24_P56887	0.00774983	1.07157	0.0997245	1.07157	up	1.62559	0.70096	1.62559	up	1.51702	0.601235	1.51702	up	685.072	710.044	1108.7	1056.46	878.582	1160.66	1028.85	499.068	747.316	0.223611	-0.151268	0.340405	0.0390692	0.0745058	0	-0.760984	-0.56341	-0.365737	CRLF3	Homo sapiens cytokine receptor-like factor 3 (CRLF3), mRNA [NM_015986]	29109779	chr17	29109720	-	FALSE	hs|17q11.2	51379	NM_015986	cytokine receptor-like factor 3	chr17:29109779-29109720	GO:0030308|GO:0005737|GO:0045944|GO:0045893|GO:0071158|GO:0045749|GO:0046427	NM_015986	Hs.370168
A_23_P500251	0.00596794	-1.1533	-0.205766	1.1533	down	1.08528	0.118071	1.08528	up	1.25166	0.323838	1.25166	up	20771.3	23227.1	29019.6	27268.5	27782.6	30296	22388.9	21427.2	23599	-0.19113	0	0.0269594	0.157109	0.148161	0.147858	-0.113715	-0.235073	-0.169596	YWHAB	Homo sapiens tyrosine 3-monooxygenase/tryptophan 5-monooxygenase activation protein, beta polypeptide (YWHAB), transcript variant 1, mRNA [NM_003404]	43535028	chr20	43534684	+	FALSE	hs|20q13.12	7529	NM_003404	tyrosine 3-monooxygenase/tryptophan 5-monooxygenase activation protein, beta polypeptide	chr20:43534684-43535028	GO:0051219|GO:0005515|GO:0008286|GO:0048471|GO:0042826|GO:0007264|GO:0005634|GO:0007265|GO:0006605|GO:0050815|GO:0005829|GO:0004497|GO:0005737|GO:0000186|GO:0007173|GO:0000165|GO:0007411|GO:0017053|GO:0042470|GO:0008633|GO:0048011|GO:0005813|GO:0016070|GO:0016071|GO:0003714|GO:0035308|GO:0019904|GO:0051220|GO:0005730|GO:0006915|GO:0043085|GO:0008022|GO:0019899|GO:0045892|GO:0008629	NM_003404	Hs.643544
A_32_P923734	0.00992032	2.09883	1.06958	2.09883	up	-1.9617	-0.972108	1.9617	down	-4.11728	-2.04169	4.11728	down	17.1868	22.3728	19.6324	16.6959	22.6362	19.1268	186.347	36.5532	29.834	-0.491347	0.552449	0	-1.28789	-0.345527	-1.51424	0.539307	1.43203	1.00609	HIP1	Homo sapiens cDNA FLJ37547 fis, clone BRCAN2027513. [AK094866]	75367533	chr7	75367474	-	FALSE	hs|7q11.23	3092	AK094866	huntingtin interacting protein 1	chr7:75367533-75367474	GO:0005515|GO:0008219|GO:0030136|GO:0005634|GO:0030154|GO:0043231|GO:0005737|GO:0030276|GO:0005856|GO:0006355|GO:0005794|GO:0006919|GO:0006915|GO:0005624|GO:0003779|GO:0042981|GO:0006917|GO:0031410|GO:0006897|GO:0012505|GO:0030665|GO:0016020|GO:0048260|GO:0005200|GO:0035091|GO:0048268
A_23_P102681	0.00131012	-1.05258	-0.073936	1.05258	down	-2.96913	-1.57004	2.96913	down	-2.8208	-1.4961	2.8208	down	58.7815	78.0854	92.4766	87.3517	83.3942	94.0427	218.136	73.1409	103.04	-0.57205	0.228192	0	-0.0949312	-0.00285947	-0.0242591	1.21611	1.30295	1.8472	MGC4294	PREDICTED: Homo sapiens hypothetical MGC4294 (MGC4294), miscRNA [XR_109628]	57210700	chr20	57210641	+	FALSE	hs|20q13.32	79160	XR_109628	hypothetical MGC4294	chr20:57210641-57210700		XR_109628	Hs.280135
A_24_P342484	0.00196939	-1.03307	-0.0469338	1.03307	down	-2.74351	-1.45602	2.74351	down	-2.6557	-1.40909	2.6557	down	12.3256	14.3823	27.3029	11.1316	18.1462	5.83881	409.144	21.4162	20.0876	0.0905718	-0.583536	-0.394867	-0.387349	0	-0.359682	0.916517	1.56858	0.995147	CRP	Homo sapiens C-reactive protein, pentraxin-related (CRP), mRNA [NM_000567]	159683888	chr1	159683829	-	FALSE	hs|1q23.2	1401	NM_000567	C-reactive protein, pentraxin-related	chr1:159683888-159683829	GO:0033265|GO:0005515|GO:0001666|GO:0010288|GO:0051258|GO:0010745|GO:0030169|GO:0005576|GO:0006953|GO:0005615|GO:0046872|GO:0042803|GO:0010888|GO:0006954|GO:0005488|GO:0015485|GO:0051637|GO:0006958|GO:0008228	NM_000567	Hs.76452
A_24_P153558	0.00957206	1.89602	0.922972	1.89602	up	-3.05581	-1.61156	3.05581	down	-5.79387	-2.53453	5.79387	down	32.4725	31.742	36.0771	22.027	30.9484	37.01	324.42	45.5315	36.2277	0.429887	-0.126326	-0.170289	-0.520024	0	-2.11562	1.63949	1.60797	1.72048	C14orf81	Homo sapiens cDNA FLJ32169 fis, clone PLACE6000523. [AK056731]	106074293	chr14	106074234	-	FALSE	hs|14q32.33	153514	AK056731	chromosome 14 open reading frame 81	chr14:106074293-106074234			Hs.650220
A_23_P303149	0.00223337	1.6347	0.709026	1.6347	up	-3.11592	-1.63966	3.11592	down	-5.0936	-2.34869	5.0936	down	23.321	14.9837	13.2589	17.7663	15.1957	13.2682	235.686	42.3551	31.5977	0	0.971351	-0.500237	-0.380182	-0.639331	-0.636453	1.48658	1.97435	1.92917	FGFR2	Homo sapiens fibroblast growth factor receptor 2 (FGFR2), transcript variant 1, mRNA [NM_000141]	123324057	chr10	123310956	-	FALSE	hs|10q26.13	2263	NM_000141	fibroblast growth factor receptor 2	chr10:123324057-123310956	GO:0005515|GO:0001657|GO:0007409|GO:0009791|GO:0021860|GO:0031069|GO:0048608|GO:0009880|GO:0000166|GO:0009887|GO:0005938|GO:0042472|GO:0048286|GO:0009986|GO:0017134|GO:0010453|GO:0030916|GO:0000122|GO:0045787|GO:0001701|GO:0045165|GO:0008543|GO:0016049|GO:0008286|GO:0008284|GO:0021847|GO:0005886|GO:0030324|GO:0007267|GO:0030177|GO:0005634|GO:0030282|GO:0048730|GO:0005737|GO:0035264|GO:0035265|GO:…	NM_000141	Hs.533683
A_23_P96302	0.00222621	-2.2555	-1.17345	2.2555	down	-1.09672	-0.133193	1.09672	down	2.05659	1.04026	2.05659	up	956.616	1084.09	1478.94	1974.12	1698.78	1591.19	1833.93	1064.64	1368.49	0.159263	-0.497304	-0.14537	0.721412	1.03958	1.27595	0	-0.0380735	-0.0457582	SPANXA1	Homo sapiens sperm protein associated with the nucleus, X-linked, family member A1 (SPANXA1), mRNA [NM_013453]	140678722	chrX	140678663	+	FALSE	hs|Xq27.2	30014	NM_013453	sperm protein associated with the nucleus, X-linked, family member A1	chrX:140678663-140678722		NM_013453	Hs.334464
A_32_P172864	0.00645432	1.10095	0.138744	1.10095	up	1.65785	0.729313	1.65785	up	1.50584	0.590569	1.50584	up	724.377	785.387	1167.55	1067.24	964.697	1190.5	1010.09	503.732	691.433	0.264015	0	0.386796	0.0909415	0.226827	-0.083189	-0.708584	-0.518465	-0.31008	FAM102B	Homo sapiens family with sequence similarity 102, member B (FAM102B), mRNA [NM_001010883]	109181681	chr1	109181622	+	FALSE	hs|1p13.3	284611	NM_001010883	family with sequence similarity 102, member B	chr1:109181622-109181681		NM_001010883	Hs.200230
A_24_P220485	0.00583983	-1.22527	-0.293105	1.22527	down	-2.35437	-1.23534	2.35437	down	-1.9215	-0.942233	1.9215	down	206.25	171.476	244.026	252.536	230.781	337.359	393.958	216.844	282.369	-0.62908	-0.483904	0	-0.224399	-0.391189	0.38192	0.839735	0.883074	0.870223	OLFML2A	Homo sapiens olfactomedin-like 2A (OLFML2A), mRNA [NM_182487]	127577079	chr9	127577020	+	FALSE	hs|9q33.3	169611	NM_182487	olfactomedin-like 2A	chr9:127577020-127577079	GO:0031012|GO:0030198|GO:0050840|GO:0005576|GO:0042803	NM_182487	Hs.357004
A_23_P55107	0.00764381	1.03247	0.0461059	1.03247	up	1.42374	0.509687	1.42374	up	1.37896	0.463581	1.37896	up	735.411	692.502	1031.67	907.753	874.697	1185.95	1432.93	516.032	748.752	-0.0571718	0.0866761	0.218029	0	0.0293245	0.0798912	-0.631418	-0.406402	-0.243708	ULK2	Homo sapiens unc-51-like kinase 2 (C. elegans) (ULK2), transcript variant 1, mRNA [NM_014683]	19677641	chr17	19677582	-	FALSE	hs|17p11.2	9706	NM_014683	unc-51-like kinase 2 (C. elegans)	chr17:19677641-19677582	GO:0005515|GO:0007165|GO:0000166|GO:0004674|GO:0007409|GO:0005524	NM_014683	Hs.168762
A_24_P328657	0.00357278	-1.16961	-0.22603	1.16961	down	-2.86539	-1.51873	2.86539	down	-2.44987	-1.2927	2.44987	down	32.6668	46.376	53.1188	26.3865	40.4229	41.7296	162.847	45.1807	41.4239	-0.00203908	-0.68389	0	-0.300032	0.470944	-0.178752	1.4808	1.10023	1.28925	PEX5L	Homo sapiens peroxisomal biogenesis factor 5-like (PEX5L), mRNA [NM_016559]	179519749	chr3	179519690	-	FALSE	hs|3q26.33	51555	NM_016559	peroxisomal biogenesis factor 5-like	chr3:179519749-179519690	GO:0017137|GO:0048471|GO:0005221|GO:0005829|GO:0045055|GO:0051286|GO:0005737|GO:0016020|GO:0005488|GO:0043949|GO:0005052|GO:0051461|GO:0016558|GO:0005778|GO:0017071	NM_016559	Hs.478393
A_23_P303671	0.000207435	2.61576	1.38723	2.61576	up	-2.97264	-1.57175	2.97264	down	-7.77573	-2.95898	7.77573	down	27.85	27.0287	30.2055	23.0196	22.3751	26.2273	274.742	34.072	30.4931	-0.0538702	0	0.909736	-0.735649	-1.33352	-1.23666	1.71941	1.86787	1.98382	ECM2	Homo sapiens extracellular matrix protein 2, female organ and adipocyte specific (ECM2), transcript variant 1, mRNA [NM_001393]	95258273	chr9	95258214	-	FALSE	hs|9q22.31	1842	NM_001393	extracellular matrix protein 2, female organ and adipocyte specific	chr9:95258273-95258214	GO:0031012|GO:0005178|GO:0007160|GO:0030198|GO:0010811|GO:0005578|GO:0005576|GO:0005614|GO:0008201|GO:0070052	NM_001393	Hs.117060
A_24_P216253	0.00976411	-1.34535	-0.427979	1.34535	down	1.37063	0.454843	1.37063	up	1.84398	0.882822	1.84398	up	888.27	630.759	1053.38	1181.96	1115.3	1578.49	1042.95	922.764	1033.17	-0.0577687	0	0.0928298	0.359155	0.341028	0.618815	-0.741614	-0.0445015	-0.543352	DLGAP4	Homo sapiens discs, large (Drosophila) homolog-associated protein 4 (DLGAP4), transcript variant 1, mRNA [NM_014902]	35155551	chr20	35155492	+	FALSE	hs|20q11.23	22839	NM_014902	discs, large (Drosophila) homolog-associated protein 4	chr20:35155492-35155551	GO:0005515|GO:0016020|GO:0007267	NM_014902	Hs.249600
A_24_P136683	0.00637653	1.12572	0.170846	1.12572	up	2.35709	1.23701	2.35709	up	2.09385	1.06616	2.09385	up	174.335	235.614	370.527	304.27	344.742	340.991	211.017	118.078	148.387	0	0.361203	0.0871711	0.0195046	-0.152892	0.069222	-1.16161	-1.55416	-0.546877	CA5BP1	Homo sapiens carbonic anhydrase VB pseudogene 1 (CA5BP1), non-coding RNA [NR_026551]	15721423	chrX	15721364	+	FALSE	hs|Xp22.2	340591	NR_026551	carbonic anhydrase VB pseudogene 1	chrX:15721364-15721423		NR_026551	Hs.532326
A_23_P127805	0.0041649	1.07573	0.105322	1.07573	up	1.27921	0.355248	1.27921	up	1.18915	0.249926	1.18915	up	90.1962	93.174	229.182	204.452	204.798	193.674	411.911	51.3655	73.9587	0.109339	0.19541	0.0358596	0	-0.0787959	0.103439	-0.185876	-0.223997	-0.315262	PLA2G16	phospholipase A2, group XVI [Source:HGNC Symbol;Acc:17825] [ENST00000323646]	63341318	chr11	63341259	-	FALSE	hs|11q12.3	11145	BE968596	phospholipase A2, group XVI	chr11:63341318-63341259	GO:0016042|GO:0005515|GO:0008150|GO:0003674|GO:0048471|GO:0005737|GO:0016787|GO:0016020|GO:0005624|GO:0016021|GO:0005575|GO:0045786		Hs.720542
A_23_P26223	0.00466089	-1.03672	-0.0520248	1.03672	down	1.32321	0.404045	1.32321	up	1.3718	0.456069	1.3718	up	997.644	1524.48	2158.95	1359.53	1872.17	1822.58	1181.72	1003.07	1105.05	-0.0641127	0.0635301	0.0990067	0	0.0448235	0.209675	-0.358608	-0.511064	-0.244038	ASL	Homo sapiens argininosuccinate lyase (ASL), transcript variant 1, mRNA [NM_001024943]	65557023	chr7	65554654	+	FALSE	hs|7q11.21	435	NM_001024943	argininosuccinate lyase	chr7:65554654-65557023	GO:0042450|GO:0034641|GO:0005737|GO:0000050|GO:0008652|GO:0006527|GO:0003824|GO:0016829|GO:0004056|GO:0005829	NM_001024943	Hs.632015
A_23_P131036	0.000563749	1.28434	0.361024	1.28434	up	-1.8742	-0.906271	1.8742	down	-2.4071	-1.2673	2.4071	down	22.3796	19.6846	33.9924	33.1802	19.2645	22.5334	116.875	33.8824	33.7953	-0.0746204	0	0.30606	-0.435856	-0.299038	-0.116738	0.732703	1.06767	1.14988		Homo sapiens cDNA clone IMAGE:4300770. [BC007817]	36159480	chr19	36159421	-	FALSE	hs|19q13.12		BC007817		chr19:36159480-36159421			Hs.569952
A_24_P114103	0.000102731	1.2298	0.298424	1.2298	up	-2.93356	-1.55265	2.93356	down	-3.60769	-1.85107	3.60769	down	44.8556	53.8541	79.5788	35.6006	55.2409	73.4497	119.629	53.7369	46.7943	0.0438085	-0.270131	0	-0.709845	-0.150296	-0.261452	1.3857	1.37245	1.67349	C1orf51	Homo sapiens chromosome 1 open reading frame 51 (C1orf51), mRNA [NM_144697]	150257081	chr1	150257022	+	FALSE	hs|1q21.2	148523	NM_144697	chromosome 1 open reading frame 51	chr1:150257022-150257081		NM_144697	Hs.54680
A_24_P25278	0.00274572	1.22431	0.291967	1.22431	up	-3.04492	-1.6064	3.04492	down	-3.72792	-1.89837	3.72792	down	12.0474	16.0382	18.0446	12.2642	25.5591	6.52603	74.6405	29.732	23.1066	0.535921	0	-0.279986	-0.450396	-0.07992	-0.0896515	1.10034	1.8094	2.1654		Homo sapiens cDNA FLJ37932 fis, clone CTONG2004941. [AK095251]	923147	chr7	923088	-	FALSE	hs|7p22.3		AK095251		chr7:923147-923088			Hs.107387
A_23_P865	0.00562633	1.42314	0.509082	1.42314	up	-2.92792	-1.54988	2.92792	down	-4.16686	-2.05896	4.16686	down	52.4089	32.8997	44.9815	75.1752	58.2759	37.4282	317.963	65.253	77.9338	-0.0663404	0.792113	0	-0.115705	-0.5217	-0.164067	2.37206	1.96706	1.03628	FRRS1	Homo sapiens ferric-chelate reductase 1 (FRRS1), mRNA [NM_001013660]	100174266	chr1	100174259	-	FALSE	hs|1p21.2	391059	NM_001013660	ferric-chelate reductase 1	chr1:100174266-100174259	GO:0016020|GO:0000293|GO:0016491|GO:0006810|GO:0016021|GO:0022900|GO:0046872	NM_001013660	Hs.454779
A_32_P142635	0.00197424	2.75633	1.46275	2.75633	up	-2.55096	-1.35104	2.55096	down	-7.0313	-2.81379	7.0313	down	52.0966	56.2585	76.732	131.01	94.5841	67.525	234.851	75.8416	88.369	0.0107594	0	-0.976596	-2.2401	-1.96295	-1.15103	1.23823	1.34598	0.503078		HA2019 Human fetal liver cDNA library Homo sapiens cDNA, mRNA sequence [AI133411]	11018886	chr8	11018827	+	FALSE	hs|8p23.1		AI133411		chr8:11018827-11018886			Hs.673130
A_23_P154801	0.00377074	-1.07189	-0.100155	1.07189	down	1.43329	0.519326	1.43329	up	1.53632	0.619482	1.53632	up	299.383	348.674	601.959	380.874	546.835	585.08	393.559	326.199	323.864	-0.0922093	0	0.138662	0.0622417	0.0043841	0.280293	-0.59202	-0.603443	-0.316063	TRPC4AP	Homo sapiens transient receptor potential cation channel, subfamily C, member 4 associated protein (TRPC4AP), transcript variant 1, mRNA [NM_015638]	33591079	chr20	33591020	-	FALSE	hs|20q11.22	26133	NM_015638	transient receptor potential cation channel, subfamily C, member 4 associated protein	chr20:33591079-33591020	GO:0005515|GO:0006511|GO:0016567|GO:0031464	NM_015638	Hs.168073
A_23_P358917	0.00458286	-4.67466	-2.22486	4.67466	down	-1.92604	-0.945634	1.92604	down	2.42709	1.27923	2.42709	up	54.2504	56.2129	103.558	152.676	155.719	150.642	237.947	67.2476	69.4149	-1.16993	-1.44021	0	1.16621	1.53541	1.36283	0.46236	-0.00504106	-0.230558	CYP3A7	Homo sapiens cytochrome P450, family 3, subfamily A, polypeptide 7 (CYP3A7), mRNA [NM_000765]	99303096	chr7	99303037	-	FALSE	hs|7q22.1	1551	NM_000765	cytochrome P450, family 3, subfamily A, polypeptide 7	chr7:99303096-99303037	GO:0005792|GO:0004497|GO:0006805|GO:0070330|GO:0019825|GO:0016020|GO:0005783|GO:0005789|GO:0009055|GO:0046872|GO:0020037	NM_000765	Hs.111944
A_23_P327519	0.000578306	1.26696	0.341375	1.26696	up	2.03315	1.02372	2.03315	up	1.60474	0.682341	1.60474	up	615.829	523.581	853.445	596.272	548.872	927.272	777.552	339.489	395.735	0.144589	0.43985	0.344363	0	-0.204049	0.108727	-0.527841	-0.795474	-0.819032	STARD4	Homo sapiens StAR-related lipid transfer (START) domain containing 4 (STARD4), mRNA [NM_139164]	110834747	chr5	110834688	-	FALSE	hs|5q22.1	134429	NM_139164	StAR-related lipid transfer (START) domain containing 4	chr5:110834747-110834688	GO:0006869|GO:0006810|GO:0008289	NM_139164	Hs.93842
A_23_P72025	0.000755292	1.02698	0.0384128	1.02698	up	1.54363	0.626323	1.54363	up	1.50307	0.58791	1.50307	up	338.015	357.724	579.904	400.136	483.197	548.476	435.661	247.71	274.22	0.0703264	0	0.0635763	0.00240183	0.117737	-0.101474	-0.744661	-0.560133	-0.440273	SLC25A20	Homo sapiens solute carrier family 25 (carnitine/acylcarnitine translocase), member 20 (SLC25A20), nuclear gene encoding mitochondrial protein, mRNA [NM_000387]	48895022	chr3	48894963	-	FALSE	hs|3p21.31	788	NM_000387	solute carrier family 25 (carnitine/acylcarnitine translocase), member 20	chr3:48895022-48894963	GO:0005739|GO:0016020|GO:0006853|GO:0006810|GO:0005743|GO:0006844|GO:0046320|GO:0016021|GO:0044255|GO:0015227	NM_000387	Hs.13845
A_24_P933492	0.00432123	-1.36735	-0.451385	1.36735	down	2.43343	1.28299	2.43343	up	3.32736	1.73438	3.32736	up	284.487	255.156	513.617	802.953	663.13	467.133	306.541	257.808	414.998	-0.40879	0	0.145176	0.137431	0.381077	0.572032	-2.02708	-1.18303	-0.902484	ZDHHC21	Homo sapiens zinc finger, DHHC-type containing 21 (ZDHHC21), mRNA [NM_178566]	14693243	chr9	14690341	-	FALSE	hs|9p22.3	340481	NM_178566	zinc finger, DHHC-type containing 21	chr9:14693243-14690341	GO:0016020|GO:0000139|GO:0050999|GO:0016409|GO:0046209|GO:0008270|GO:0016021|GO:0046872|GO:0016740	NM_178566	Hs.649522
A_23_P427760	0.00460137	-1.62629	-0.701585	1.62629	down	-2.26836	-1.18165	2.26836	down	-1.3948	-0.480062	1.3948	down	31.4161	35.8003	46.808	34.2341	50.8159	51.2743	136.037	38.2614	43.4047	-0.741547	-1.08217	-0.549478	0	0.0516109	-0.32005	0.516787	0.620937	0.0340244	PIWIL4	Homo sapiens piwi-like 4 (Drosophila) (PIWIL4), mRNA [NM_152431]	94354282	chr11	94354223	+	FALSE	hs|11q21	143689	NM_152431	piwi-like 4 (Drosophila)	chr11:94354223-94354282	GO:0005634|GO:0007275|GO:0007283|GO:0031047|GO:0034584|GO:0006417|GO:0030154|GO:0005737|GO:0007126|GO:0034587|GO:0043186|GO:0071547|GO:0043046	NM_152431	Hs.660188
A_23_P345220	0.00326695	-1.1997	-0.262678	1.1997	down	2.18171	1.12546	2.18171	up	2.6174	1.38814	2.6174	up	188.238	138.945	223.881	454.409	278.036	311.094	252.014	115.039	169.174	0	-0.0757248	0.0124791	0.273421	0.308909	0.142457	-1.69612	-0.653263	-1.09024	SH3PXD2A	Homo sapiens SH3 and PX domains 2A (SH3PXD2A), mRNA [NM_014631]	105359548	chr10	105359489	-	FALSE	hs|10q24.33	9644	NM_014631	SH3 and PX domains 2A	chr10:105359548-105359489	GO:0005515|GO:0005737|GO:0030054|GO:0007154|GO:0006801|GO:0002102|GO:0042995|GO:0035091	NM_014631	Hs.594708
A_23_P105794	0.00170726	1.13684	0.185029	1.13684	up	-3.73685	-1.90182	3.73685	down	-4.2482	-2.08685	4.2482	down	38.4512	44.7373	53.028	43.5171	38.9143	65.1699	203.685	58.7609	55.8792	0.0235486	-0.0616708	-0.928101	-0.849392	-0.671916	0	1.66527	1.78171	1.29226	EPSTI1	Homo sapiens epithelial stromal interaction 1 (breast) (EPSTI1), transcript variant 2, mRNA [NM_033255]	43528115	chr13	43500538	-	FALSE	hs|13q14.11	94240	NM_033255	epithelial stromal interaction 1 (breast)	chr13:43528115-43500538		NM_033255	Hs.546467
A_24_P494194	0.00273064	1.27691	0.352652	1.27691	up	-3.75759	-1.90981	3.75759	down	-4.79809	-2.26246	4.79809	down	10.7866	9.77449	7.35382	9.25341	6.38207	7.19113	149.739	20.3807	18.0087	0	0.245134	-0.833775	-0.472926	-0.332304	-0.841369	1.25571	2.3621	1.52297		Homo sapiens cDNA FLJ13509 fis, clone PLACE1005108. [AK023571]	51572740	chr15	51572681	-	FALSE	hs|15q21.2		AK023571		chr15:51572740-51572681			Hs.729964
A_24_P601576	0.00428193	-1.32644	-0.407559	1.32644	down	-1.16561	-0.221088	1.16561	down	1.13798	0.186471	1.13798	up	1172.99	1268.67	2139.82	1789.79	1839.5	2221.65	2085.2	1409.6	1598.21	-0.126621	-0.319563	-0.18662	0.308784	0.0784893	0.202599	0	-0.0178833	0.0483446		polycystic kidney disease 1 (autosomal dominant) [Source:HGNC Symbol;Acc:9008] [ENST00000480227]	15221022	chr16	15220963	-	FALSE	hs|16p13.11		BC048794		chr16:15221022-15220963			Hs.634612
A_24_P42308	0.00714961	-1.23481	-0.304294	1.23481	down	1.58692	0.66623	1.58692	up	1.95955	0.970524	1.95955	up	36.7075	41.467	169.786	123.853	146.482	108.07	82.2954	37.7251	32.4109	-0.038461	0	0.0706983	0.229486	0.248063	0.467571	-1.05113	-0.261761	-0.653559		Homo sapiens cDNA FLJ31887 fis, clone NT2RP7003050. [AK056449]	150050225	chr5	150050166	-	FALSE	hs|5q33.1		AK056449		chr5:150050225-150050166			Hs.91626
A_32_P108301	0.00370884	1.10279	0.14116	1.10279	up	-2.69833	-1.43207	2.69833	down	-2.9757	-1.57323	2.9757	down	19.0546	17.6546	24.1345	21.306	21.1115	20.0137	100.355	26.1984	24.5643	0.00762975	-0.181109	-0.649027	-0.936971	0	-0.309014	1.05859	1.46564	0.949468		oq89a02.s1 NCI_CGAP_Kid6 Homo sapiens cDNA clone IMAGE:1593482 3' similar to gb:L13923 FIBRILLIN 1 PRECURSOR (HUMAN);, mRNA sequence [AA989132]	48702497	chr15	48702438	+	FALSE	hs|15q21.1		AA989132		chr15:048702438-048702497			Hs.146447
A_23_P200598	0.00910993	-1.04409	-0.0622444	1.04409	down	1.34281	0.425253	1.34281	up	1.40201	0.487497	1.40201	up	854.653	1282.8	2006.5	1232.33	1791.28	1786.65	1207.76	884.326	857.551	-0.0516253	0.244083	0.0280552	0	0.110856	0.296391	-0.415908	-0.237052	-0.402286	MUL1	Homo sapiens mitochondrial E3 ubiquitin protein ligase 1 (MUL1), nuclear gene encoding mitochondrial protein, mRNA [NM_024544]	20825962	chr1	20825925	-	FALSE	hs|1p36.12	79594	NM_024544	mitochondrial E3 ubiquitin protein ligase 1	chr1:20825962-20825925	GO:0005515|GO:0004842|GO:0030308|GO:0016567|GO:0016874|GO:0005741|GO:0005634|GO:0046872|GO:0042802|GO:0005739|GO:0005737|GO:0004871|GO:0043123|GO:0051646|GO:0005777|GO:0000266|GO:0016881|GO:0006919|GO:0005730|GO:0006917|GO:0007257|GO:0007165|GO:0016020|GO:0008270|GO:0016021|GO:0031307	NM_024544	Hs.10101
A_24_P49539	0.00629603	-1.0911	-0.125779	1.0911	down	1.25904	0.332326	1.25904	up	1.37374	0.458106	1.37374	up	1745.9	2410.08	3365.51	2955.89	3133.32	2953.58	2042.57	1750.05	1723.75	0.133536	-0.22764	0	0.143593	0.106886	0.0327559	-0.343796	-0.338629	-0.408658	MRPL55	Homo sapiens mitochondrial ribosomal protein L55 (MRPL55), nuclear gene encoding mitochondrial protein, transcript variant 4, mRNA [NM_181462]	228294560	chr1	228294501	-	FALSE	hs|1q42.13	128308	NM_181462	mitochondrial ribosomal protein L55	chr1:228294560-228294501	GO:0005739|GO:0003735|GO:0005840|GO:0006412|GO:0005762	NM_181462	Hs.63236
A_24_P929640	0.00585478	-1.71299	-0.776519	1.71299	down	-3.31003	-1.72685	3.31003	down	-1.93231	-0.950327	1.93231	down	39.0424	25.6551	42.2396	55.5937	49.6788	41.3993	551.525	39.5833	45.9197	-1.11558	-0.493959	-1.14492	-0.460553	0.0356464	0	1.39402	0.673041	0.359017			23414046	chr19	23413987	-	FALSE	hs|19p12				chr19:023414046-023413987
A_23_P425880	0.00857071	-1.64091	-0.714499	1.64091	down	-1.89794	-0.924437	1.89794	down	-1.15664	-0.209937	1.15664	down	946.483	990.757	1803.76	963.622	1894.36	2006.76	1274.75	1561.62	1860.11	-0.68645	-0.80335	-0.380537	0.119837	0.178818	-0.0254937	0.217781	0	0.685191	TRIO	Homo sapiens triple functional domain (PTPRF interacting) (TRIO), mRNA [NM_007118]	14508495	chr5	14508436	+	FALSE	hs|5p15.2	7204	NM_007118	triple functional domain (PTPRF interacting)	chr5:14508436-14508495	GO:0051056|GO:0008624|GO:0048011|GO:0035023|GO:0007264|GO:0006915|GO:0005524|GO:0005829|GO:0005085|GO:0005622|GO:0005737|GO:0000166|GO:0004674|GO:0007411|GO:0007185|GO:0005089	NM_007118	Hs.130031
A_23_P59051	0.00448755	-1.12703	-0.172532	1.12703	down	-3.80286	-1.92709	3.80286	down	-3.37422	-1.75455	3.37422	down	55.0187	59.2884	64.6432	43.3765	50.7986	83.9145	460.652	62.6413	68.2996	-0.493998	-0.465507	0	0.328654	-0.237601	-0.532963	2.23103	1.63194	0.958781	SLC17A2	Homo sapiens solute carrier family 17 (sodium phosphate), member 2 (SLC17A2), mRNA [NM_005835]	25913520	chr6	25913461	-	FALSE	hs|6p22.2	10246	NM_005835	solute carrier family 17 (sodium phosphate), member 2	chr6:25913520-25913461	GO:0005436|GO:0016020|GO:0005887|GO:0005624|GO:0006796|GO:0006814|GO:0055085|GO:0015293|GO:0006811	NM_005835	Hs.591802
A_24_P354356	0.00138263	1.08213	0.113874	1.08213	up	1.64208	0.715522	1.64208	up	1.51745	0.601647	1.51745	up	5340.26	3908.45	5636.11	5645.27	4743.24	6809.86	4705.91	3292.83	4762.55	0	0.21019	0.150861	0.0273008	-0.129821	0.121947	-0.762707	-0.592833	-0.429975	FAM131A	Homo sapiens family with sequence similarity 131, member A (FAM131A), transcript variant 1, mRNA [NM_144635]	184064018	chr3	184063959	+	FALSE	hs|3q27.1	131408	NM_144635	family with sequence similarity 131, member A	chr3:184063959-184064018	GO:0005576	NM_144635	Hs.591307
A_32_P153781	0.00372522	-1.06216	-0.0869952	1.06216	down	-3.74885	-1.90645	3.74885	down	-3.52947	-1.81945	3.52947	down	55.2374	64.9058	74.9536	66.3241	63.7224	106.143	170.995	84.4027	71.8641	0	-0.325202	-0.877066	-0.356298	-0.658886	0.0739025	1.43606	2.08997	0.991036		Homo sapiens cDNA FLJ41071 fis, clone 3NB692003538. [AK123066]	97330140	chr9	97330081	+	FALSE	hs|9q22.32		AK123066		chr9:97330081-97330140			Hs.674409
A_23_P55544	0.00309989	-1.78754	-0.837979	1.78754	down	2.1728	1.11956	2.1728	up	3.88398	1.95754	3.88398	up	101.033	114.616	187.134	191.778	254.488	280.016	164.814	57.1003	105.4	-0.700905	0	0.049897	0.8691	0.535012	0.458818	-1.5888	-1.682	-0.738875	CCBE1	Homo sapiens collagen and calcium binding EGF domains 1 (CCBE1), mRNA [NM_133459]	57102090	chr18	57102031	-	FALSE	hs|18q21.32	147372	NM_133459	collagen and calcium binding EGF domains 1	chr18:57102090-57102031	GO:0001946|GO:0005581|GO:0005509|GO:0007275|GO:0005576|GO:0002040|GO:0048845	NM_133459	Hs.34333
A_24_P101800	0.000543218	2.45128	1.29353	2.45128	up	-4.1996	-2.07025	4.1996	down	-10.2944	-3.36378	10.2944	down	41.7887	47.7482	47.8784	45.2989	52.5157	57.8109	139.947	55.5445	56.7417	0.0715723	0	-1.04422	-1.0049	-1.79361	-2.05474	1.46646	2.0269	1.74474		chromosome 20 open reading frame 112 [Source:HGNC Symbol;Acc:16106] [ENST00000485364]	31136419	chr20	31136360	-	FALSE	hs|20q11.21		XM_003118803		chr20:31136419-31136360		XM_003118803	Hs.729734
A_24_P141227	0.00738895	1.9441	0.959106	1.9441	up	-3.88571	-1.95818	3.88571	down	-7.55422	-2.91728	7.55422	down	20.0183	18.8465	30.8442	23.8652	31.2491	14.2256	203.833	33.1651	22.9369	-0.235926	0	0.0525862	-1.49335	-0.209519	-1.35779	0.757299	2.13701	2.79688	LMX1B	Homo sapiens LIM homeobox transcription factor 1, beta (LMX1B), transcript variant 1, mRNA [NM_002316]	129453338	chr9	129453279	+	FALSE	hs|9q33.3	4010	NM_002316	LIM homeobox transcription factor 1, beta	chr9:129453279-129453338	GO:0005515|GO:0008219|GO:0006355|GO:0003700|GO:0008283|GO:0021954|GO:0021587|GO:0005634|GO:0007275|GO:0009953|GO:0001701|GO:0046872|GO:0006351|GO:0043565|GO:0035265|GO:0045944|GO:0030199|GO:0030182|GO:0043010|GO:0008270|GO:0001764	NM_002316	Hs.129133
A_24_P46417	0.00270032	-1.03459	-0.0490653	1.03459	down	1.37623	0.460718	1.37623	up	1.42384	0.509783	1.42384	up	799.151	813.877	1027.8	876.131	911.882	1338.55	999.7	710.407	833.335	0.065585	0.0497865	0	-0.0746795	0.112518	0.224729	-0.56033	-0.359359	-0.347093	STK10	Homo sapiens serine/threonine kinase 10 (STK10), mRNA [NM_005990]	171470684	chr5	171470625	-	FALSE	hs|5q35.1	6793	NM_005990	serine/threonine kinase 10	chr5:171470684-171470625	GO:0000166|GO:0004674|GO:0006468|GO:0005524	NM_005990	Hs.519756
A_23_P209799	0.00262067	1.41521	0.501013	1.41521	up	-3.83152	-1.93792	3.83152	down	-5.42239	-2.43893	5.42239	down	24.6192	39.5069	42.0297	26.7505	50.0991	35.4455	112.711	39.3158	38.34	0.796	0	-0.767335	-0.412317	-0.107782	-0.954274	1.93112	1.92603	1.98526	MYO7B	Homo sapiens myosin VIIB (MYO7B), mRNA [NM_001080527]	128394948	chr2	128394487	+	FALSE	hs|2q14.3	4648	NM_001080527	myosin VIIB	chr2:128394487-128394948	GO:0016324|GO:0003774|GO:0005886|GO:0000166|GO:0003779|GO:0016459|GO:0005856|GO:0005524	NM_001080527	Hs.154578
A_24_P269006	0.00293568	-1.04761	-0.0671075	1.04761	down	1.52157	0.60556	1.52157	up	1.59402	0.672667	1.59402	up	266.38	269.019	432.685	371.584	387.988	481.221	455.089	236.208	277.289	0	-0.194981	0.282901	0.158177	0.00146644	0.129599	-0.647734	-0.523458	-0.557568	ALDH7A1	Homo sapiens aldehyde dehydrogenase 7 family, member A1 (ALDH7A1), nuclear gene encoding mitochondrial protein, transcript variant 1, mRNA [NM_001182]	125880251	chr5	125880192	-	FALSE	hs|5q23.2	501	NM_001182	aldehyde dehydrogenase 7 family, member A1	chr5:125880251-125880192	GO:0007605|GO:0004029|GO:0006081|GO:0005634|GO:0005575|GO:0005829|GO:0005739|GO:0034641|GO:0005737|GO:0008802|GO:0005759|GO:0016491|GO:0006554|GO:0004043	NM_001182	Hs.483239
A_24_P922314	0.00225598	1.72029	0.78265	1.72029	up	-2.57161	-1.36267	2.57161	down	-4.42392	-2.14532	4.42392	down	9.90324	9.88685	5.3642	8.78474	5.84749	4.88287	174.924	16.7701	20.1056	0.560142	0	-0.293525	-0.775561	-0.700973	-0.6048	0.900797	2.05981	1.39403			197550323	chr1	197550264	+	FALSE	hs|1q31.3				chr1:197550264-197550323
A_23_P38388	0.00572493	1.86227	0.897059	1.86227	up	-3.82158	-1.93417	3.82158	down	-7.1168	-2.83123	7.1168	down	53.9773	72.9496	90.7731	82.4917	84.662	73.5209	312.198	63.9531	72.9293	0.590987	0	-0.669701	-0.378671	-1.68965	-0.701572	2.72552	1.55058	1.44769	TMEM92	Homo sapiens transmembrane protein 92 (TMEM92), transcript variant 1, mRNA [NM_153229]	48357005	chr17	48356946	+	FALSE	hs|17q21.33	162461	NM_153229	transmembrane protein 92	chr17:48356946-48357005	GO:0016020|GO:0016021	NM_153229	Hs.224630
A_24_P588897	0.00133605	1.02482	0.03537	1.02482	up	1.84127	0.880704	1.84127	up	1.79668	0.845334	1.79668	up	179.807	170.317	277.873	265.032	209.455	315.299	316.451	130.508	195.755	-0.0226822	0.0709666	0.407056	0	0.221453	0.127778	-0.925113	-0.62778	-0.63388	SLCO3A1	Homo sapiens solute carrier organic anion transporter family, member 3A1 (SLCO3A1), transcript variant 1, mRNA [NM_013272]	92709122	chr15	92709063	+	FALSE	hs|15q26.1	28232	NM_013272	solute carrier organic anion transporter family, member 3A1	chr15:92709063-92709122	GO:0005215|GO:0005886|GO:0015347|GO:0043252|GO:0016021|GO:0055085|GO:0006811	NM_013272	Hs.311187
A_23_P123234	0.000132907	-5.97245	-2.57832	5.97245	down	-1.31861	-0.399019	1.31861	down	4.52935	2.1793	4.52935	up	906.395	1251.25	1885.32	2011.18	3074.45	3389.11	1202.41	1112.85	1193.99	-0.255499	-0.817252	-0.748549	1.6937	2.10706	2.11291	-0.667915	0.0436734	0			100781156	chr7	100781097	+	FALSE	hs|7q22.1				chr7:100781097-100781156
A_23_P28886	0.00875458	1.16498	0.220308	1.16498	up	-1.42004	-0.505935	1.42004	down	-1.65433	-0.726243	1.65433	down	9546.62	10038.2	14903.7	9085.81	9747.57	14683.6	12486.4	9674.44	10850	0	-0.30546	0.107669	-0.0977983	-0.212454	-0.548463	0.47999	0.497478	0.342545	PCNA	Homo sapiens proliferating cell nuclear antigen (PCNA), transcript variant 1, mRNA [NM_002592]	5096102	chr20	5095957	-	FALSE	hs|20p13	5111	NM_002592	proliferating cell nuclear antigen	chr20:5096102-5095957	GO:0005515|GO:0043626|GO:0032405|GO:0008283|GO:0033993|GO:0005634|GO:0032077|GO:0019985|GO:0006886|GO:0007507|GO:0000084|GO:0000082|GO:0005737|GO:0006271|GO:0000083|GO:0000723|GO:0015630|GO:0000722|GO:0070557|GO:0005663|GO:0006297|GO:0006298|GO:0043596|GO:0006275|GO:0048015|GO:0000701|GO:0005730|GO:0030337|GO:0003677|GO:0006260|GO:0006281|GO:0006283|GO:0000307|GO:0006284|GO:0032139|GO:0005652|GO:…	NM_002592	Hs.147433
A_23_P415541	0.00440997	1.94807	0.962046	1.94807	up	-2.78495	-1.47765	2.78495	down	-5.42528	-2.4397	5.42528	down	16.9446	9.96025	7.81051	13.4048	10.5639	5.94647	485.399	22.1322	21.4875	0	0.81704	-0.529719	-0.969793	-1.29601	-0.333011	1.13762	1.57675	2.0059	GPR26	Homo sapiens G protein-coupled receptor 26 (GPR26), mRNA [NM_153442]	125453989	chr10	125453930	+	FALSE	hs|10q26.13	2849	NM_153442	G protein-coupled receptor 26	chr10:125453930-125453989	GO:0005886|GO:0004930|GO:0004872|GO:0016021|GO:0007189	NM_153442	Hs.12751
A_24_P351852	0.00131689	-1.39211	-0.47727	1.39211	down	-2.887	-1.52957	2.887	down	-2.07384	-1.0523	2.07384	down	25.4765	27.3747	49.6901	46.6987	43.7967	40.3697	304.924	37.9431	36.558	-0.71447	-0.766684	-0.179045	0	-0.408045	0.179658	0.822143	1.16231	0.944065	LAT2	Homo sapiens linker for activation of T cells family, member 2 (LAT2), transcript variant 1, mRNA [NM_032464]	73635042	chr7	73634570	+	FALSE	hs|7q11.23	7462	NM_032464	linker for activation of T cells family, member 2	chr7:73634570-73635042	GO:0050853|GO:0035556|GO:0005622|GO:0005515|GO:0042113|GO:0043303|GO:0019722|GO:0005886|GO:0045121|GO:0016021|GO:0042169	NM_032464	Hs.726075
A_23_P254081	0.000597202	-1.18551	-0.245514	1.18551	down	2.61564	1.38716	2.61564	up	3.10088	1.63268	3.10088	up	158.349	217.151	365.233	324.059	331.326	323.519	251.237	154.517	181.435	-0.0812239	0	0.489166	0.162342	0.456278	0.525863	-1.02122	-1.16194	-1.57039	LIAS	Homo sapiens lipoic acid synthetase (LIAS), nuclear gene encoding mitochondrial protein, transcript variant 1, mRNA [NM_006859]	39478826	chr4	39478767	+	FALSE	hs|4p14	11019	NM_006859	lipoic acid synthetase	chr4:39478767-39478826	GO:0005739|GO:0051539|GO:0006954|GO:0032496|GO:0009107|GO:0001843|GO:0016992|GO:0006979|GO:0046872|GO:0016740	NM_006859	Hs.550502
A_24_P110541	0.00319619	1.04971	0.0699924	1.04971	up	1.59312	0.67186	1.59312	up	1.51768	0.601867	1.51768	up	9355.09	14877.7	20166.3	20117.6	19989.1	15738.8	9195.83	7480.34	9529.66	0.266689	0	0.0454444	0.116591	0.0510654	-0.0655001	-0.461741	-0.803607	-0.438097							FALSE
A_24_P353208	0.00917582	-1.7553	-0.811715	1.7553	down	-5.06448	-2.34041	5.06448	down	-2.88526	-1.5287	2.88526	down	27.1052	22.7345	19.7727	31.0185	31.3246	14.0971	760.152	28.8166	21.8508	-0.334026	-0.356152	-1.48814	0.893356	0	-0.636529	1.89511	1.2831	1.66471	SIRPG	Homo sapiens signal-regulatory protein gamma (SIRPG), transcript variant 1, mRNA [NM_018556]	1616119	chr20	1616060	-	FALSE	hs|20p13	55423	NM_018556	signal-regulatory protein gamma	chr20:1616119-1616060	GO:0005515|GO:0008284|GO:0008285|GO:0022409|GO:0005886|GO:0034329|GO:0007267|GO:0050900|GO:0005622|GO:0035556|GO:0016020|GO:0007596|GO:0050870|GO:0016021|GO:0007155	NM_018556	Hs.590883
A_24_P921871	0.00575885	1.60303	0.680803	1.60303	up	-3.76199	-1.9115	3.76199	down	-6.03059	-2.5923	6.03059	down	18.7433	11.4361	14.1761	14.9416	15.2372	8.77461	609.898	22.5273	21.3699	0	0.677532	-1.264	-0.977931	-0.664399	-0.98655	1.31066	1.6833	2.15406			161043351	chr3	161043292	-	FALSE	hs|3q26.1				chr3:161043351-161043292
A_23_P171232	0.00240451	2.47346	1.30653	2.47346	up	-4.17124	-2.06048	4.17124	down	-10.3174	-3.36701	10.3174	down	10.0498	10.0138	9.04562	8.81383	7.12252	9.26711	533.256	17.0935	20.7976	0.549424	0	-0.814627	-0.805909	-1.2451	-2.13379	2.66513	1.84547	1.40563	AMOT	angiomotin [Source:HGNC Symbol;Acc:17810] [ENST00000304758]	112018058	chrX	112017999	-	FALSE	hs|Xq23	154796	AF286598	angiomotin	chrX:112018058-112017999	GO:0005515|GO:0030036|GO:0030054|GO:0005884|GO:0030139|GO:0005737|GO:0042074|GO:0008180|GO:0006935|GO:0040019|GO:0004872|GO:0030334|GO:0001725|GO:0009986|GO:0001726|GO:0001701|GO:0001702|GO:0030027|GO:0045793|GO:0043536|GO:0043532|GO:0051496|GO:0016525|GO:0007043|GO:0005923|GO:0016021|GO:0001570|GO:0009897|GO:0043116		Hs.528051
A_23_P168584	0.00370975	-1.21265	-0.278168	1.21265	down	1.24521	0.316394	1.24521	up	1.51001	0.594563	1.51001	up	574.066	749.387	1392.52	1185.85	1350.99	1315.87	920.622	605.088	669.58	-0.0600099	0	0.195037	0.127721	0.386244	0.455567	-0.265537	-0.305389	-0.243229	POMZP3	Homo sapiens POM121 and ZP3 fusion (POMZP3), transcript variant 2, mRNA [NM_152992]	76255370	chr7	76254995	-	FALSE	hs|7q11.23	22932	NM_152992	POM121 and ZP3 fusion	chr7:76255370-76254995	GO:0008150|GO:0003674|GO:0005575	NM_152992	Hs.488877
A_23_P201790	4.81437e-05	-1.28289	-0.359403	1.28289	down	1.8098	0.855831	1.8098	up	2.32178	1.21523	2.32178	up	648.069	736.542	1200.27	1307.76	1130.55	1377.56	847.883	466.448	694.212	-0.0439005	0	0.280625	0.422564	0.491662	0.400707	-0.873868	-0.7904	-0.6665	PPP1R12B	Homo sapiens protein phosphatase 1, regulatory (inhibitor) subunit 12B (PPP1R12B), transcript variant 1, mRNA [NM_002481]	202557577	chr1	202557518	+	FALSE	hs|1q32.1	4660	NM_002481	protein phosphatase 1, regulatory (inhibitor) subunit 12B	chr1:202557518-202557577	GO:0007165|GO:0006937|GO:0005737|GO:0043085|GO:0008047	NM_002481	Hs.444403
A_24_P604989	0.000830239	1.89341	0.920989	1.89341	up	-3.02341	-1.59618	3.02341	down	-5.72457	-2.51717	5.72457	down	99.0074	110.416	126.062	91.6037	125.614	193.22	272.877	89.7545	118.226	0.291156	0	-0.13492	-0.855382	-1.20764	-0.543709	2.30469	1.47449	1.16559		Homo sapiens mRNA; cDNA DKFZp686D2330 (from clone DKFZp686D2330). [CR936609]	4851803	chr1	4851744	+	FALSE	hs|1p36.32		CR936609		chr1:4851744-4851803			Hs.12473
A_32_P26536	0.00600089	1.26944	0.34419	1.26944	up	-2.78705	-1.47874	2.78705	down	-3.53799	-1.82293	3.53799	down	16.5942	18.0705	32.2814	28.6346	16.089	28.5131	211.158	34.5006	29.6298	0	-0.0699696	-0.0842414	-0.278142	-1.08345	0.17481	0.890227	1.71593	1.67585			205700879	chr2	205700820	+	FALSE	hs|2q33.3				chr2:205700820-205700879
A_24_P212096	0.000224783	-1.4992	-0.584189	1.4992	down	1.33998	0.422212	1.33998	up	2.00889	1.0064	2.00889	up	276.288	342.924	532.971	476.912	579.036	624.998	350.153	230.507	329.372	0.0123007	-0.128707	0	0.506113	0.685517	0.44453	-0.482653	-0.615953	-0.284438	NAV1	Homo sapiens neuron navigator 1 (NAV1), transcript variant 1, mRNA [NM_020443]	201762954	chr1	201759870	+	FALSE	hs|1q32.1	89796	NM_020443	neuron navigator 1	chr1:201759870-201762954	GO:0017111|GO:0005737|GO:0000166|GO:0005874|GO:0007275|GO:0005856|GO:0030154|GO:0007399	NM_020443	Hs.585374
A_23_P398566	2.84321e-05	1.07406	0.103079	1.07406	up	2.16042	1.11131	2.16042	up	2.01145	1.00823	2.01145	up	580.4	585.107	985.179	802.352	802.518	826.552	699.585	304.495	361.392	0.173731	-0.0756732	0.274019	0	0.0283374	0.0345038	-0.929396	-0.997988	-1.03448	NR4A3	Homo sapiens nuclear receptor subfamily 4, group A, member 3 (NR4A3), transcript variant 3, mRNA [NM_173200]	102629044	chr9	102628985	+	FALSE	hs|9q31.1	8013	NM_173200	nuclear receptor subfamily 4, group A, member 3	chr9:102628985-102629044	GO:0010467|GO:0034339|GO:0003700|GO:0031100|GO:0003707|GO:0043434|GO:0005634|GO:0048752|GO:0046872|GO:0043524|GO:0007411|GO:0060005|GO:0050885|GO:0043401|GO:0030534|GO:0005667|GO:0001707|GO:0033554|GO:0003677|GO:0045787|GO:0043565|GO:0008150|GO:0021766|GO:0001077|GO:2000108|GO:0005488|GO:0008270|GO:0005654|GO:0004887	NM_173200	Hs.279522
A_23_P216176	0.00357386	1.66508	0.735592	1.66508	up	-2.06389	-1.04537	2.06389	down	-3.43655	-1.78096	3.43655	down	9.62609	9.48044	5.35887	8.75193	5.7912	4.84657	173.537	17.4384	17.8197	0.616897	0	-0.182387	-0.66733	-0.601974	-0.502963	0.641661	1.62481	1.30414	MSR1	Homo sapiens macrophage scavenger receptor 1 (MSR1), transcript variant SR-AI, mRNA [NM_138715]	15967613	chr8	15967554	-	FALSE	hs|8p22	4481	NM_138715	macrophage scavenger receptor 1	chr8:15967613-15967554	GO:0005515|GO:0005581|GO:0005886|GO:0010744|GO:0030169|GO:0030301|GO:0031410|GO:0010886|GO:0042221|GO:0006898|GO:0005829|GO:0042953|GO:0005887|GO:0034381|GO:0034362|GO:0004872|GO:0005044	NM_138715	Hs.147635
A_23_P39056	0.000558623	-15.4205	-3.94678	15.4205	down	-3.03163	-1.60009	3.03163	down	5.08655	2.34669	5.08655	up	24.3993	10.8988	13.5204	167.636	164.491	234.341	1094.26	24.2447	20.8822	-2.13421	-0.668512	-1.2323	2.28412	2.83545	2.68575	-0.237333	0	1.0026	KLK7	Homo sapiens kallikrein-related peptidase 7 (KLK7), transcript variant 1, mRNA [NM_005046]	51480736	chr19	51480677	-	FALSE	hs|19q13.41	5650	NM_005046	kallikrein-related peptidase 7	chr19:51480736-51480677	GO:0008544|GO:0004252|GO:0006508|GO:0008236|GO:0008233|GO:0005576	NM_005046	Hs.151254
A_24_P88554	0.00378397	-1.15764	-0.211188	1.15764	down	2.00611	1.0044	2.00611	up	2.32236	1.21559	2.32236	up	437.351	512.174	831.196	741.075	730.866	782.067	509.002	372.979	434.528	-0.260704	0	0.297914	0.158248	0.133744	0.37878	-1.34228	-1.02958	-0.604142	PEX11B	Homo sapiens peroxisomal biogenesis factor 11 beta (PEX11B), transcript variant 1, mRNA [NM_003846]	145523662	chr1	145523603	+	FALSE	hs|1q21.1	8799	NM_003846	peroxisomal biogenesis factor 11 beta	chr1:145523603-145523662	GO:0005739|GO:0005515|GO:0007165|GO:0016020|GO:0007031|GO:0016021|GO:0005779|GO:0005778|GO:0016559|GO:0005777	NM_003846	Hs.714608
A_24_P753110	0.00647885	1.06578	0.0919071	1.06578	up	-2.8124	-1.4918	2.8124	down	-2.9974	-1.58371	2.9974	down	14.4468	26.2382	73.8849	58.4394	54.6959	47.3807	110.254	41.0302	21.2161	-0.0853316	-0.217221	0.366826	-0.137379	0	-0.0740699	0.752829	1.99874	1.78812		Q9UM77_HUMAN (Q9UM77) Olfactory receptor 17-210, complete [THC2612796]	3020254	chr17	3020195	+	FALSE	hs|17p13.3				chr17:003020195-003020254
A_32_P224253	0.00115818	2.65738	1.41	2.65738	up	-3.0894	-1.62733	3.0894	down	-8.20971	-3.03733	8.20971	down	41.7446	44.7687	59.338	40.5756	48.2051	48.5182	277.668	48.0885	53.2266	0.148626	-0.123768	0	-1.08641	-1.98246	-1.13629	2.4839	1.17402	1.24892	DNAH11	Homo sapiens dynein, axonemal, heavy chain 11 (DNAH11), mRNA [NM_003777]	21584760	chr7	21584701	+	FALSE	hs|7p15.3	8701	NM_003777	dynein, axonemal, heavy chain 11	chr7:21584701-21584760	GO:0007368|GO:0001539|GO:0005874|GO:0003777|GO:0035085|GO:0005524|GO:0005929|GO:0005737|GO:0000166|GO:0005858|GO:0005856|GO:0016887|GO:0007018	NM_003777	Hs.730733
A_23_P207939	0.00563578	2.09117	1.06431	2.09117	up	-1.99097	-0.993473	1.99097	down	-4.16347	-2.05778	4.16347	down	93.5744	115.768	139.638	108.292	118.83	160.382	162.099	109.721	130.353	0.224197	0	-0.0265241	-0.710641	-1.24307	-1.04155	0.219335	1.73884	1.21992	C18orf1	Homo sapiens chromosome 18 open reading frame 1 (C18orf1), transcript variant a2, mRNA [NM_181482]	13646562	chr18	13646503	+	FALSE	hs|18p11.21	753	NM_181482	chromosome 18 open reading frame 1	chr18:13646503-13646562	GO:0008150|GO:0003674|GO:0005886|GO:0016021	NM_181482	Hs.149363
A_24_P85009	0.00719686	1.87137	0.904097	1.87137	up	-3.145	-1.65306	3.145	down	-5.88547	-2.55716	5.88547	down	59.6445	54.4809	62.397	84.2051	87.0607	62.8284	171.091	85.5533	87.8306	0	0.238768	-1.67132	-1.24679	-1.17392	-1.72413	1.24341	1.3179	0.965325	FGF13	Homo sapiens fibroblast growth factor 13 (FGF13), transcript variant 4, mRNA [NM_001139498]	138286303	chrX	138286244	-	FALSE	hs|Xq27.1	2258	NM_001139498	fibroblast growth factor 13	chrX:138286303-138286244	GO:0005515|GO:0007165|GO:0005737|GO:0000165|GO:0007267|GO:0001934|GO:0005634|GO:0030295|GO:0008083|GO:0007399	NM_001139498	Hs.6540
A_32_P139311	0.00721172	-1.57204	-0.652636	1.57204	down	1.42687	0.512852	1.42687	up	2.24309	1.16549	2.24309	up	114.114	116.89	162.401	193.291	195.809	285.42	307.789	85.4548	126.243	-0.00697106	0	0.564542	0.574568	1.01144	0.92947	-0.078064	-0.644261	-0.258659			44387746	chr18	44387687	-	FALSE	hs|18q21.1				chr18:044387746-044387687
A_23_P130648	0.00273338	-1.18685	-0.247135	1.18685	down	1.23818	0.308226	1.23818	up	1.46954	0.555361	1.46954	up	284.752	368.906	679.117	438.852	710.339	749.033	437.878	328.318	313.241	0	-0.0588054	0.169641	0.285806	0.183825	0.382609	-0.15078	-0.385472	-0.27759	GIPC1	Homo sapiens GIPC PDZ domain containing family, member 1 (GIPC1), transcript variant 1, mRNA [NM_005716]	14589307	chr19	14589248	-	FALSE	hs|19p13.12	10755	NM_005716	GIPC PDZ domain containing family, member 1	chr19:14589307-14589248	GO:0005515|GO:0007268|GO:0030139|GO:0006605|GO:0032435|GO:0042803|GO:0005829|GO:0005737|GO:0031647|GO:0043197|GO:0048167|GO:0043198|GO:0005938|GO:0030511|GO:0012506|GO:0005102|GO:0005624|GO:0005625|GO:0003779|GO:0030165|GO:0014047|GO:0008021|GO:0044445|GO:0005903|GO:0007186|GO:0016020|GO:0043542|GO:0016023|GO:0017022	NM_005716	Hs.655012
A_23_P207233	0.0079541	2.64367	1.40254	2.64367	up	-1.3722	-0.456489	1.3722	down	-3.62765	-1.85903	3.62765	down	21.6284	22.536	18.1281	54.0267	42.1242	22.415	248.12	23.2189	35.5876	0	-0.204021	0.769998	-0.773413	-1.42519	-1.44306	0.959375	0.955729	0.0203422							FALSE
A_23_P340922	0.00612852	-1.15732	-0.210793	1.15732	down	-2.00866	-1.00623	2.00866	down	-1.7356	-0.795438	1.7356	down	86.694	125.223	211.057	68.6063	128.334	195.61	636.05	154.815	162.183	-0.500757	0	-0.224442	0.210721	-0.269834	-0.0337054	0.638836	0.589133	1.06553	ZNF414	Homo sapiens zinc finger protein 414 (ZNF414), transcript variant 2, mRNA [NM_032370]	8577309	chr19	8576824	-	FALSE	hs|19p13.2	84330	NM_032370	zinc finger protein 414	chr19:8577309-8576824	GO:0005622|GO:0006355|GO:0008270|GO:0005634|GO:0003677|GO:0046872	NM_032370	Hs.515114
A_23_P385673	0.00488595	1.64742	0.720206	1.64742	up	-3.37699	-1.75574	3.37699	down	-5.56332	-2.47595	5.56332	down	23.7892	18.2673	19.9866	24.4221	20.8991	13.5538	245.845	32.0392	27.8833	0	0.263444	-1.14996	-1.34822	-0.449941	-1.24897	1.52055	1.00086	1.85929	RASA3	Homo sapiens mRNA for Ins(1,3,4,5)P4-binding protein. [X89399]	114751214	chr13	114751155	-	FALSE	hs|13q34	22821	X89399	RAS p21 protein activator 3	chr13:114751214-114751155	GO:0051056|GO:0005886|GO:0031235|GO:0046872|GO:0005099|GO:0035556|GO:0043547|GO:0007165|GO:0046580|GO:0005737|GO:0032320|GO:0015278|GO:0005096		Hs.593075
A_23_P146444	0.00932302	1.26268	0.336486	1.26268	up	1.80241	0.849926	1.80241	up	1.42745	0.51344	1.42745	up	656.788	623.974	973.638	710.833	676.152	1113.54	825.379	440.816	665.556	0.225047	0.364129	0.435299	-0.126698	0	0.141715	-0.896734	-0.377231	-0.251338	CORO2A	Homo sapiens coronin, actin binding protein, 2A (CORO2A), transcript variant 1, mRNA [NM_003389]	100883421	chr9	100883362	-	FALSE	hs|9q22.33	7464	NM_003389	coronin, actin binding protein, 2A	chr9:100883421-100883362	GO:0035556|GO:0005622|GO:0051015|GO:0030036|GO:0017053|GO:0015629	NM_003389	Hs.113094
A_24_P333216	0.00126267	1.14792	0.199022	1.14792	up	-3.72611	-1.89767	3.72611	down	-4.27727	-2.09669	4.27727	down	33.7577	17.1112	27.5959	22.1644	30.7348	27.0942	1537.95	32.019	24.0808	-0.586297	-0.0247048	0	-0.925499	-0.297877	0.015307	1.35947	1.60917	2.11337	PP2672	PREDICTED: Homo sapiens hypothetical LOC100130249 (PP2672), miscRNA [XR_112023]	234893566	chr1	234893507	-	FALSE	hs|1q42.3	100130249	XR_112023	hypothetical LOC100130249	chr1:234893566-234893507		XR_112023	Hs.617350
A_23_P323685	0.00243053	-1.19979	-0.262777	1.19979	down	1.41159	0.497324	1.41159	up	1.69361	0.760101	1.69361	up	4159.35	2846.49	5765.89	6811.36	5976.39	5202.13	4697.85	4023.93	4745.31	0.18776	-0.0203648	0	0.196601	0.376916	0.382209	-0.295508	-0.34387	-0.685198	HIST1H4H	Homo sapiens histone cluster 1, H4h (HIST1H4H), mRNA [NM_003543]	26285556	chr6	26285497	-	FALSE	hs|6p22.2	8365	NM_003543	histone cluster 1, H4h	chr6:26285556-26285497		NM_003543	Hs.591790
A_23_P420428	0.00182177	1.09007	0.124421	1.09007	up	-1.24492	-0.316055	1.24492	down	-1.35705	-0.440476	1.35705	down	1349.17	1616.79	2225.19	1145.84	1555.49	2301.05	1783.03	1446.23	1533.63	0.172584	-0.0887603	0	-0.0667799	-0.0858706	-0.136789	0.350142	0.391154	0.290693	COMMD7	Homo sapiens COMM domain containing 7 (COMMD7), transcript variant 1, mRNA [NM_053041]	31291057	chr20	31290998	-	FALSE	hs|20q11.21	149951	NM_053041	COMM domain containing 7	chr20:31291057-31290998	GO:0005515|GO:0051059|GO:0032088|GO:0005575|GO:0045892|GO:0033209	NM_053041	Hs.408427
A_32_P41594	0.0016177	-1.46228	-0.548219	1.46228	down	2.24073	1.16397	2.24073	up	3.27657	1.71218	3.27657	up	127.978	178.109	292.268	248.15	254.036	269.717	201.643	110.902	120.591	0	-0.0741391	0.680147	0.592295	1.10606	0.552312	-0.896102	-0.81164	-1.17815			100173065	chr1	100173006	-	FALSE	hs|1p21.2				chr1:100173065-100173006
A_32_P222362	0.00947253	1.17392	0.231331	1.17392	up	1.83633	0.876826	1.83633	up	1.56428	0.645495	1.56428	up	217.44	253.612	366.279	322.644	295.765	359.472	355.236	196.531	195.89	0.0269341	0.264465	0.260771	0	-0.201683	0.0598592	-0.763721	-0.303481	-1.01111		Homo sapiens cDNA FLJ45189 fis, clone BRAWH3049068. [AK127132]	31834296	chr22	31834237	+	FALSE	hs|22q12.2		AK127132		chr22:31834237-31834296			Hs.596399
A_23_P341938	0.00519799	-1.44454	-0.530607	1.44454	down	-2.68395	-1.42436	2.68395	down	-1.858	-0.893749	1.858	down	37.5156	45.7819	74.2408	68.6855	86.3845	56.2536	91.8637	43.4845	45.0881	-0.571528	-0.95255	-0.461761	-0.687339	0.29332	0	0.698234	0.740537	0.848457	NOG	Homo sapiens noggin (NOG), mRNA [NM_005450]	54672278	chr17	54672219	+	FALSE	hs|17q22	9241	NM_005450	noggin	chr17:54672219-54672278	GO:0005515|GO:0060044|GO:0007389|GO:0001657|GO:0021533|GO:0001655|GO:0021983|GO:0048706|GO:0009953|GO:0001837|GO:0060302|GO:0005615|GO:0032403|GO:2000313|GO:0048570|GO:0042803|GO:0030514|GO:0048646|GO:0042474|GO:0090193|GO:0035019|GO:0090190|GO:0050679|GO:0030336|GO:0048762|GO:0005576|GO:0030509|GO:0001701|GO:0001649|GO:0007399|GO:0048712|GO:0008045|GO:0001501|GO:0060825|GO:0045668|GO:0019955|GO:…	NM_005450	Hs.248201
A_23_P392962	0.00336	2.43301	1.28274	2.43301	up	-3.32719	-1.7343	3.32719	down	-8.09509	-3.01705	8.09509	down	24.2312	16.274	24.0837	25.6744	24.8747	24.7047	135.762	33.0949	29.0535	0	0.794609	-0.398352	-1.13051	-1.67701	-0.644454	0.998145	2.19792	2.40311	GRAP	Homo sapiens GRB2-related adaptor protein (GRAP), mRNA [NM_006613]	19036018	chr17	19035959	+	FALSE	hs|17p11.2	10750	NM_006613	GRB2-related adaptor protein	chr17:19035959-19036018	GO:0005737|GO:0005070|GO:0007267|GO:0007265	NM_006613	Hs.567416
A_23_P82868	0.000295544	-4.67133	-2.22383	4.67133	down	-1.87595	-0.907619	1.87595	down	2.49012	1.31622	2.49012	up	1868.33	1422.38	2391.01	3177.48	3702.43	5928.59	2523.91	2200.93	2557.73	-0.671295	-1.41234	-1.0836	0.946654	1.17714	1.38047	-0.479554	0.0351773	0	PLAT	Homo sapiens plasminogen activator, tissue (PLAT), transcript variant 1, mRNA [NM_000930]	42032871	chr8	42032812	-	FALSE	hs|8p11.21	5327	NM_000930	plasminogen activator, tissue	chr8:42032871-42032812	GO:0005515|GO:0004252|GO:0009986|GO:0005576|GO:0005615|GO:0045861|GO:0031012|GO:0005737|GO:0007596|GO:0006508|GO:0008233|GO:0042730|GO:0006464	NM_000930	Hs.491582
A_23_P2640	0.00585094	1.7351	0.795015	1.7351	up	-4.13728	-2.04868	4.13728	down	-7.17857	-2.8437	7.17857	down	20.133	13.7261	11.8089	19.782	15.2609	8.76329	220.161	29.13	23.1186	0	0.831642	-0.750065	-0.981169	-1.13301	-0.189287	1.25691	2.30196	2.66875	CLEC7A	Homo sapiens C-type lectin domain family 7, member A (CLEC7A), transcript variant 1, mRNA [NM_197947]	10270977	chr12	10270918	-	FALSE	hs|12p13.2	64581	NM_197947	C-type lectin domain family 7, member A	chr12:10270977-10270918	GO:0042287|GO:0008037|GO:0005886|GO:0005529|GO:0042832|GO:0006910|GO:0046872|GO:0002221|GO:0005737|GO:0009756|GO:0042110|GO:0006954|GO:0005488|GO:0045087|GO:0016021|GO:0008329	NM_197947	Hs.143929
A_32_P366909	0.00782872	-1.43019	-0.516208	1.43019	down	-2.22692	-1.15505	2.22692	down	-1.55708	-0.638843	1.55708	down	28.645	17.4576	49.6338	53.7438	41.7157	33.4097	572.402	26.554	25.5486	-0.756391	-0.657859	-0.0170788	0	0.154815	-0.0375204	0.437349	0.98231	0.614164		Homo sapiens cDNA FLJ43896 fis, clone TESTI4009752. [AK125884]	151991208	chr1	151991149	+	FALSE	hs|1q21.3		AK125884		chr1:151991149-151991208			Hs.656557
A_24_P902042	0.00530801	1.85842	0.894075	1.85842	up	-2.28959	-1.19509	2.28959	down	-4.25502	-2.08916	4.25502	down	10.0264	9.7551	5.38366	8.80762	6.66111	4.87564	406.69	15.7785	18.9624	0.620605	0	-0.247295	-0.72488	-1.02075	-0.563282	0.651613	1.98232	1.32465		Homo sapiens cDNA clone IMAGE:5296679. [BC043261]	60993782	chr5	60993451	-	FALSE	hs|5q12.1		BC043261		chr5:60993782-60993451			Hs.662309
A_23_P16275	0.00019926	-1.14021	-0.189298	1.14021	down	-3.72217	-1.89614	3.72217	down	-3.26446	-1.70685	3.26446	down	39.8671	42.3786	55.175	51.6701	57.3261	50.2007	495.974	50.7138	53.2148	-0.213947	-0.209383	-0.304885	0.159007	-0.319328	0	2.00795	1.69167	1.26059	TSKS	Homo sapiens testis-specific serine kinase substrate (TSKS), mRNA [NM_021733]	50243359	chr19	50243174	-	FALSE	hs|19q13.33	60385	NM_021733	testis-specific serine kinase substrate	chr19:50243359-50243174	GO:0005515|GO:0019901|GO:0005814	NM_021733	Hs.515858
A_24_P944756	0.0023372	1.40177	0.487247	1.40177	up	-2.45985	-1.29857	2.45985	down	-3.44814	-1.78582	3.44814	down	25.6724	27.063	36.1256	24.6746	28.1897	53.4898	144.03	35.8107	25.4679	0	-0.445937	0.383208	-0.91889	-0.175803	-0.429778	1.38693	1.48258	0.963479	NECAB1	Homo sapiens N-terminal EF-hand calcium binding protein 1 (NECAB1), mRNA [NM_022351]	91971477	chr8	91971418	+	FALSE	hs|8q21.3	64168	NM_022351	N-terminal EF-hand calcium binding protein 1	chr8:91971418-91971477	GO:0005737|GO:0005509|GO:0016491|GO:0017000	NM_022351	Hs.302754
A_24_P101642	0.00660657	1.48996	0.575272	1.48996	up	-2.02285	-1.01639	2.02285	down	-3.01396	-1.59166	3.01396	down	16.4083	9.30821	18.3873	23.6547	19.2224	17.9877	133.296	21.688	19.7511	0	0.700319	-0.343481	-0.214973	-0.846496	-0.307509	0.875124	1.26088	1.26999	LOC401847	PREDICTED: Homo sapiens hypothetical protein LOC401847 (LOC401847), mRNA [XM_001718104]	33605635	chr16	33605576	+	FALSE	hs|16p11.2	401847	XM_001718104	hypothetical protein LOC401847	chr16:33605576-33605635		XM_001718104
A_24_P72646	0.00979864	-1.55924	-0.640846	1.55924	down	-2.74342	-1.45597	2.74342	down	-1.75946	-0.815129	1.75946	down	26.7249	36.7163	63.2173	68.7204	64.7852	49.1002	202.598	38.1506	36.7359	-0.964355	-1.00155	-0.110322	-0.488034	0	0.334348	0.651129	0.832552	0.808018	FLJ14107	Homo sapiens hypothetical LOC80094 (FLJ14107), non-coding RNA [NR_027715]	22499175	chr8	22499116	-	FALSE	hs|8p21.3	80094	NR_027715	hypothetical LOC80094	chr8:22499175-22499116		NR_027715	Hs.675917
A_23_P79518	0.00378971	-6.96285	-2.79968	6.96285	down	1.12919	0.175282	1.12919	up	7.86234	2.97496	7.86234	up	66.1337	65.7695	110.142	269.337	254.469	382.739	262.809	61.3832	80.2775	-1.06632	-0.710832	0	2.02691	2.21701	2.37795	0.500608	-1.29219	-1.51142	IL1B	Homo sapiens interleukin 1, beta (IL1B), mRNA [NM_000576]	113587488	chr2	113587429	-	FALSE	hs|2q13	3553	NM_000576	interleukin 1, beta	chr2:113587488-113587429	GO:0005515|GO:0032755|GO:0014070|GO:0009408|GO:0019221|GO:0033591|GO:0002711|GO:0005615|GO:0032757|GO:0031622|GO:0030730|GO:0032496|GO:0034116|GO:0033198|GO:0007613|GO:0043123|GO:0043122|GO:0010332|GO:0032355|GO:0032729|GO:0045410|GO:0032725|GO:0007566|GO:0007568|GO:0010193|GO:0019904|GO:0030593|GO:0010243|GO:0014805|GO:0043278|GO:0005125|GO:0045086|GO:0042060|GO:0035176|GO:0008083|GO:0045080|GO:…	NM_000576	Hs.126256
A_32_P205478	0.00180376	-1.32266	-0.403444	1.32266	down	1.65191	0.724133	1.65191	up	2.18491	1.12758	2.18491	up	308.573	440.276	780.863	674.376	713.541	696.805	500.825	279.778	293.029	-0.180631	0	0.427705	0.38518	0.464647	0.607578	-0.735703	-0.731946	-0.457676		AGENCOURT_8859642 NIH_MGC_71 Homo sapiens cDNA clone IMAGE:6473897 5', mRNA sequence [BQ948285]	128167917	chr7	128167858	-	FALSE	hs|7q32.1		BQ948285		chr7:128167917-128167858			Hs.638240
A_23_P336663	0.0085932	1.46206	0.548006	1.46206	up	-2.28319	-1.19105	2.28319	down	-3.33817	-1.73906	3.33817	down	10.5096	8.95438	5.36096	8.67391	5.71341	4.78227	456.265	14.4757	15.344	0.290036	0	-0.0393407	-0.535827	-0.479803	-0.377692	0.56541	2.07067	1.18777	SLC7A13	Homo sapiens solute carrier family 7 (anionic amino acid transporter), member 13 (SLC7A13), mRNA [NM_138817]	87226718	chr8	87226659	-	FALSE	hs|8q21.3	157724	NM_138817	solute carrier family 7 (anionic amino acid transporter), member 13	chr8:87226718-87226659	GO:0016020|GO:0015171|GO:0016021	NM_138817	Hs.149095
A_24_P336510	0.00306747	2.79899	1.48491	2.79899	up	-2.98162	-1.5761	2.98162	down	-8.34554	-3.06101	8.34554	down	12.8142	10.0673	9.83938	11.1254	10.0547	9.76665	232.76	15.9675	20.4383	0	0.0136474	-1.12593	-1.35111	-1.99713	-2.21877	0.385164	1.85935	1.3715	CFHR1	Homo sapiens complement factor H-related 1 (CFHR1), mRNA [NM_002113]	196794764	chr1	196794705	+	FALSE	hs|1q31.3	3078	NM_002113	complement factor H-related 1	chr1:196794705-196794764	GO:0006956|GO:0005576|GO:0005615	NM_002113	Hs.575869
A_32_P90080	0.00570971	-1.08244	-0.114284	1.08244	down	1.1478	0.19887	1.1478	up	1.24242	0.313154	1.24242	up	1001.11	1017.36	1623.79	1184.17	1404.79	1889.89	1496.66	960.048	1098.86	0	-0.00444704	0.17106	0.102877	0.167457	0.239133	-0.157167	-0.0965062	-0.176324	ARMC10	Homo sapiens armadillo repeat containing 10 (ARMC10), transcript variant A, mRNA [NM_031905]	102739191	chr7	102739132	+	FALSE	hs|7q22.1	83787	NM_031905	armadillo repeat containing 10	chr7:102739132-102739191	GO:0005739|GO:0016020|GO:0005783|GO:0005488|GO:0005789|GO:0016021|GO:0040008	NM_031905	Hs.287412
A_23_P170719	0.00748044	-2.26195	-1.17757	2.26195	down	1.24012	0.310484	1.24012	up	2.8051	1.48805	2.8051	up	283.829	430.649	716.871	849.519	1039.64	855.108	465.923	317.154	423.174	-0.379162	-0.436002	0	0.61827	1.12301	0.976252	-1.0479	-0.753343	0.0546303							FALSE
A_24_P810290	0.00734717	-1.39844	-0.483819	1.39844	down	1.4866	0.572019	1.4866	up	2.07893	1.05584	2.07893	up	1095.67	942.863	1722.97	1678.53	1833.29	2408.68	1312.48	776.657	1155.76	-0.139682	0	0.445678	0.758548	0.673489	0.325417	-0.731205	-0.409726	-0.269131	PPAPDC1A	Homo sapiens phosphatidic acid phosphatase type 2 domain containing 1A (PPAPDC1A), mRNA [NM_001030059]	122349161	chr10	122349102	+	FALSE	hs|10q26.12	196051	NM_001030059	phosphatidic acid phosphatase type 2 domain containing 1A	chr10:122349102-122349161	GO:0016787|GO:0016020|GO:0046839|GO:0016021|GO:0008195	NM_001030059	Hs.40479
A_23_P214080	0.00421537	-1.55749	-0.639225	1.55749	down	1.01409	0.0201798	1.01409	up	1.57943	0.659405	1.57943	up	3425.72	3670.73	5325.7	5040.53	4510.8	7444.92	4411.47	3277.01	3963.09	0	-0.488071	0.00818521	0.500611	0.464205	0.472974	-0.193158	-0.180013	-0.167254	EGR1	Homo sapiens early growth response 1 (EGR1), mRNA [NM_001964]	137804950	chr5	137804891	+	FALSE	hs|5q31.2	1958	NM_001964	early growth response 1	chr5:137804891-137804950	GO:0005515|GO:0003700|GO:0006366|GO:0072110|GO:0000982|GO:0019221|GO:0005634|GO:0071480|GO:0071445|GO:0046872|GO:0005622|GO:0005737|GO:0072303|GO:0060337|GO:0003690|GO:0045944|GO:0048169|GO:0007611|GO:0033233|GO:0090090|GO:0070498|GO:0035035|GO:0032868|GO:0000122|GO:0030509|GO:0003676|GO:0003677|GO:0009749|GO:0043565|GO:0030217|GO:0071504|GO:0071506|GO:0008270|GO:0045893	NM_001964	Hs.326035
A_24_P934284	0.0072746	1.51063	0.595148	1.51063	up	-1.82093	-0.864679	1.82093	down	-2.75075	-1.45983	2.75075	down	9.12429	8.88053	5.74358	8.65646	5.69946	4.77032	276.116	16.8216	14.9879	0.678397	0	-0.236287	-0.518857	-0.463419	-0.361057	0.562375	1.30741	1.16636			154795888	chr7	154795829	-	FALSE	hs|7q36.2				chr7:154795888-154795829
A_23_P55749	0.00107918	1.21462	0.280504	1.21462	up	-2.53014	-1.33922	2.53014	down	-3.07316	-1.61972	3.07316	down	31.3621	33.396	52.2853	47.1216	48.9301	36.4906	206.261	32.8697	43.2788	0	-0.394001	-0.163975	-0.580177	0.0418692	-0.86118	1.19808	1.18249	1.07911	COL5A3	Homo sapiens collagen, type V, alpha 3 (COL5A3), mRNA [NM_015719]	10070602	chr19	10070543	-	FALSE	hs|19p13.2	50509	NM_015719	collagen, type V, alpha 3	chr19:10070602-10070543	GO:0005581|GO:0007160|GO:0030199|GO:0005518|GO:0043588|GO:0005576|GO:0005588|GO:0007155|GO:0008201|GO:0005201	NM_015719	Hs.235368
A_23_P144020	0.00214676	2.59113	1.37358	2.59113	up	-2.26199	-1.17759	2.26199	down	-5.86112	-2.55118	5.86112	down	15.6781	13.1386	16.1143	13.8208	12.3582	8.86646	97.1188	20.4368	22.902	0.0364266	0	-0.453623	-1.26324	-1.82134	-1.45337	0.197892	1.26049	1.6572	CNTN4	Homo sapiens contactin 4 (CNTN4), transcript variant 3, mRNA [NM_175613]	3095644	chr3	3095585	+	FALSE	hs|3p26.2	152330	NM_175613	contactin 4	chr3:3095585-3095644	GO:0005515|GO:0030424|GO:0005886|GO:0005576|GO:0007409|GO:0031225|GO:0031175|GO:0007399|GO:0007413|GO:0045665|GO:0048167|GO:0007411|GO:0007420|GO:0007155|GO:0007158	NM_175613	Hs.298705
A_24_P237912	0.00271012	2.2191	1.14998	2.2191	up	-2.9429	-1.55724	2.9429	down	-6.53058	-2.70721	6.53058	down	26.2877	20.9835	22.1762	20.3794	21.1149	22.5884	171.297	31.1219	35.4073	0.0259628	0	-1.33784	-0.996309	-1.71888	-2.04661	1.12217	1.11111	1.12656	FAM115C	Homo sapiens family with sequence similarity 115, member C (FAM115C), transcript variant 3, mRNA [NM_001130026]	143424647	chr7	143424588	+	FALSE	hs|7q35	285966	NM_001130026	family with sequence similarity 115, member C	chr7:143424588-143424647		NM_001130026	Hs.729402
A_23_P152505	0.00491197	-1.37764	-0.462201	1.37764	down	1.88142	0.911825	1.88142	up	2.59193	1.37403	2.59193	up	1326.47	1327.91	2426.23	2485.18	2347.35	3439.41	1294.37	1059.21	1364.83	-0.309178	0	0.469454	0.42364	0.479162	0.644078	-1.27985	-0.664296	-0.631056	ABAT	Homo sapiens 4-aminobutyrate aminotransferase (ABAT), nuclear gene encoding mitochondrial protein, transcript variant 2, mRNA [NM_000663]	8878387	chr16	8878328	+	FALSE	hs|16p13.2	18	NM_000663	4-aminobutyrate aminotransferase	chr16:8878328-8878387	GO:0005515|GO:0003867|GO:0045471|GO:0007268|GO:0048148|GO:0045776|GO:0007269|GO:0042803|GO:0005739|GO:0032145|GO:0032144|GO:0005759|GO:0010039|GO:0009450|GO:0007610|GO:0007626|GO:0019717|GO:0001666|GO:0042493|GO:0047298|GO:0030170|GO:0007620|GO:0042135|GO:0016740|GO:0035094	NM_000663	Hs.336768
A_32_P181008	0.00751577	-1.74137	-0.800223	1.74137	down	-3.31748	-1.73009	3.31748	down	-1.9051	-0.929863	1.9051	down	23.3415	25.6866	90.8494	71.1494	90.6292	66.9001	709.535	28.9475	31.3032	-1.04441	-1.36411	-0.120524	-0.154254	0.0258808	0	0.561832	1.25464	0.844745			112622669	chrX	112622610	+	FALSE	hs|Xq23				chrX:112622610-112622669
A_24_P332482	0.00403767	1.18526	0.245209	1.18526	up	-1.17359	-0.230933	1.17359	down	-1.39102	-0.476141	1.39102	down	22678.2	21754.4	28002.3	20198.7	24967.1	29534.6	25829.6	23823.4	26607.3	0.104901	0	-0.138679	-0.175154	-0.26902	-0.32523	0.334547	0.202726	0.121747			78806337	chr5	78806278	+	FALSE	hs|5q14.1				chr5:078806278-078806337
A_32_P224234	0.00227018	1.07497	0.104297	1.07497	up	1.34768	0.430478	1.34768	up	1.25369	0.326181	1.25369	up	279.527	206.753	321.301	270.18	276.222	327.131	474.942	209.882	272.358	0.132471	0.0282893	0.163474	-0.0108371	0.0221787	0	-0.457763	-0.316784	-0.192653	LOC645195	Homo sapiens cDNA FLJ41456 fis, clone BRSTN2012320. [AK123450]	65721517	chr1	65721458	+	FALSE	hs|1p31.3	645195	AK123450	hypothetical LOC645195	chr1:65721458-65721517			Hs.536063
A_32_P46594	0.00350467	1.67006	0.739902	1.67006	up	-1.46234	-0.548279	1.46234	down	-2.4422	-1.28818	2.4422	down	18.1722	14.5957	31.6188	24.7187	25.5411	16.5522	89.8426	25.2368	26.8072	0	-0.0365548	0.44941	-0.414363	-0.900552	-0.491935	0.353581	0.867832	0.836279	LOC145837	Homo sapiens hypothetical LOC145837 (LOC145837), non-coding RNA [NR_026979]	69863234	chr15	69863175	+	FALSE	hs|15q23	145837	NR_026979	hypothetical LOC145837	chr15:69863175-69863234		NR_026979	Hs.410126
A_23_P412029	0.00435879	1.3431	0.425566	1.3431	up	-2.63366	-1.39707	2.63366	down	-3.53727	-1.82264	3.53727	down	41.3367	44.3897	54.8695	31.3458	38.7358	64.3903	181.668	37.9936	49.2614	0	-0.392308	0.592355	-0.308033	-0.435148	-0.33347	2.0587	1.29591	1.03665	PUS10	Homo sapiens pseudouridylate synthase 10 (PUS10), mRNA [NM_144709]	61168287	chr2	61168228	-	FALSE	hs|2p16.1	150962	NM_144709	pseudouridylate synthase 10	chr2:61168287-61168228	GO:0009982|GO:0003723|GO:0016853|GO:0001522|GO:0008033	NM_144709	Hs.368348
A_32_P116538	0.0034823	-1.32938	-0.410754	1.32938	down	-3.16721	-1.66321	3.16721	down	-2.38247	-1.25246	2.38247	down	38.0403	26.2178	46.5346	92.4963	50.4082	34.6637	528.911	50.9167	59.1902	-1.03858	-0.690264	0.0644823	-0.0578103	0	-0.374292	1.26867	1.18475	0.871843			24021414	chr16	24021355	-	FALSE	hs|16p12.2				chr16:024021414-024021355
A_23_P139635	0.000783057	1.43091	0.516935	1.43091	up	-3.88691	-1.95862	3.88691	down	-5.56183	-2.47556	5.56183	down	23.5398	19.9311	13.1414	17.719	21.596	13.9237	540.967	26.1903	30.5077	0	0.240072	-0.667527	-0.591074	-0.335271	-1.05192	1.38931	2.20196	1.85715	DAO	Homo sapiens D-amino-acid oxidase (DAO), mRNA [NM_001917]	109294665	chr12	109294606	+	FALSE	hs|12q24.11	1610	NM_001917	D-amino-acid oxidase	chr12:109294606-109294665	GO:0034641|GO:0005782|GO:0005488|GO:0016491|GO:0046487|GO:0003884|GO:0006551|GO:0005777	NM_001917	Hs.113227
A_23_P86434	0.000132156	1.02099	0.0299634	1.02099	up	2.29525	1.19865	2.29525	up	2.24807	1.16869	2.24807	up	200.915	218.603	351.237	218.719	284.128	300.143	216.949	106.078	144.426	0	0.344018	0.218915	-0.0311275	0.343388	0.160782	-1.12542	-0.949175	-0.958423	LOC84989	Homo sapiens hypothetical LOC84989 (LOC84989), non-coding RNA [NR_027182]	65226100	chr10	65226041	+	FALSE	hs|10q21.3	84989	NR_027182	hypothetical LOC84989	chr10:65226041-65226100		NR_027182	Hs.659950
A_23_P139376	0.000709094	1.14563	0.196137	1.14563	up	-1.07578	-0.105386	1.07578	down	-1.23245	-0.301523	1.23245	down	70791.7	93290.6	113722	103990	104423	105622	78523.6	72773.2	81458	0.021864	-0.0470905	0	-0.275454	-0.182365	-0.155819	0.143038	0.0838147	0.0640793	RPS3	Homo sapiens ribosomal protein S3 (RPS3), mRNA [NM_001005]	75115164	chr11	75115105	+	FALSE	hs|11q13.4	6188	NM_001005	ribosomal protein S3	chr11:75115105-75115164	GO:0005515|GO:0003906|GO:0010467|GO:0045738|GO:0019058|GO:0005634|GO:0003729|GO:0006412|GO:0006413|GO:0006414|GO:0005829|GO:0005622|GO:0005737|GO:0016032|GO:0003735|GO:0051536|GO:0051059|GO:0019901|GO:0006919|GO:0019083|GO:0032587|GO:0032088|GO:0006917|GO:0006415|GO:0006974|GO:0003684|GO:0004519|GO:0022627|GO:0030529|GO:0031018|GO:0044267	NM_001005	Hs.546286
A_23_P327451	0.00781886	-2.88969	-1.53091	2.88969	down	-3.84098	-1.94147	3.84098	down	-1.3292	-0.41056	1.3292	down	50.9555	37.2731	58.713	82.4175	83.7417	91.4672	1641.13	52.6472	71.7854	-1.48787	-1.05635	-1.54238	0	0.277504	0.228639	1.51855	-0.0427255	0.261993	NPR3	Homo sapiens natriuretic peptide receptor C/guanylate cyclase C (atrionatriuretic peptide receptor C) (NPR3), transcript variant 2, mRNA [NM_000908]	32786430	chr5	32786371	+	FALSE	hs|5p13.3	4883	NM_000908	natriuretic peptide receptor C/guanylate cyclase C (atrionatriuretic peptide receptor C)	chr5:32786371-32786430	GO:0033688|GO:0042562|GO:0005624|GO:0007200|GO:0007193|GO:0042803|GO:0001501|GO:0016941|GO:0016020|GO:0008217|GO:0004872|GO:0002158|GO:0016021|GO:0017046|GO:0035810	NM_000908	Hs.13528
A_24_P71904	0.000107955	2.30431	1.20434	2.30431	up	-2.76877	-1.46925	2.76877	down	-6.38011	-2.67358	6.38011	down	31.9705	34.9028	33.5534	33.7148	31.3552	44.7048	145.795	43.2069	43.7074	0.0695478	-0.0367526	0	-1.08548	-1.54921	-0.945519	1.01149	1.75183	1.67722	HPGD	Homo sapiens hydroxyprostaglandin dehydrogenase 15-(NAD) (HPGD), transcript variant 1, mRNA [NM_000860]	175411745	chr4	175411686	-	FALSE	hs|4q34.1	3248	NM_000860	hydroxyprostaglandin dehydrogenase 15-(NAD)	chr4:175411745-175411686	GO:0006629|GO:0007565|GO:0006693|GO:0007567|GO:0019372|GO:0005730|GO:0070403|GO:0005634|GO:0045786|GO:0003824|GO:0004957|GO:0042803|GO:0005829|GO:0005737|GO:0051287|GO:0005488|GO:0016491|GO:0006631|GO:0007179|GO:0016404	NM_000860	Hs.596913
A_24_P234822	9.30142e-05	1.86887	0.902169	1.86887	up	-4.03182	-2.01143	4.03182	down	-7.53496	-2.9136	7.53496	down	25.9724	26.8643	26.8996	18.9865	18.3676	29.8921	266.285	35.788	28.1434	0.00580156	0	-0.151041	-0.480734	-1.03776	-1.33325	1.69606	1.83572	2.35728	RIOK2	Homo sapiens RIO kinase 2 (yeast) (RIOK2), transcript variant 1, mRNA [NM_018343]	96497347	chr5	96497288	-	FALSE	hs|5q15	55781	NM_018343	RIO kinase 2 (yeast)	chr5:96497347-96497288	GO:0000166|GO:0016301|GO:0004674|GO:0006468|GO:0005524	NM_018343	Hs.27021
A_23_P37685	0.00512041	1.31646	0.396664	1.31646	up	-2.48461	-1.31302	2.48461	down	-3.27089	-1.70968	3.27089	down	73.6049	73.7521	92.2705	84.6707	81.4692	98.2565	195.022	72.9846	81.5704	-0.0222452	0	-0.0276945	-1.11368	-0.284057	0.157804	1.55602	1.34763	0.985468	TMEM204	Homo sapiens transmembrane protein 204, mRNA (cDNA clone MGC:111564 IMAGE:4692469), complete cds. [BC105785]	1605545	chr16	1605486	+	FALSE	hs|16p13.3	79652	BC105785	transmembrane protein 204	chr16:1605486-1605545	GO:0030054|GO:0005912|GO:0005886|GO:0006950|GO:0016021|GO:0001945|GO:0051145		Hs.459652
A_23_P73135	0.0087018	1.54056	0.623457	1.54056	up	-2.96746	-1.56923	2.96746	down	-4.57156	-2.19269	4.57156	down	19.5901	14.0393	18.5464	12.4285	20.0639	17.5095	165.193	28.5433	27.5894	-0.134884	0.578786	0	-0.320772	-0.944616	-0.161081	0.767745	2.17288	2.21097	USHBP1	Homo sapiens Usher syndrome 1C binding protein 1 (USHBP1), mRNA [NM_031941]	17362446	chr19	17361220	-	FALSE	hs|19p13.11	83878	NM_031941	Usher syndrome 1C binding protein 1	chr19:17362446-17361220	GO:0005515|GO:0030165	NM_031941	Hs.512773
A_24_P352952	0.0058073	1.73187	0.792327	1.73187	up	-1.99627	-0.997304	1.99627	down	-3.45727	-1.78963	3.45727	down	25.8952	12.5708	27.5584	8.86114	15.0552	16.1649	126.094	29.5784	22.6529	0.441744	0	-0.405282	-0.183223	-1.30385	-0.853448	0.957223	0.864748	1.2064	FAM20A	Homo sapiens family with sequence similarity 20, member A (FAM20A), transcript variant 1, mRNA [NM_017565]	66537099	chr17	66537040	-	FALSE	hs|17q24.2	54757	NM_017565	family with sequence similarity 20, member A	chr17:66537099-66537040	GO:0005576	NM_017565	Hs.268874
A_23_P108734	0.00240776	-3.17693	-1.66763	3.17693	down	-1.75478	-0.811286	1.75478	down	1.81045	0.856348	1.81045	up	14.9787	9.98063	32.1648	31.9616	41.1466	36.9752	171.399	17.7121	51.0715	-1.25955	-0.894254	-0.416321	1.01427	0.779995	0.638516	-0.394512	0.25825	0	ALLC	Homo sapiens allantoicase (ALLC), transcript variant 1, mRNA [NM_018436]	3745025	chr2	3744966	+	FALSE	hs|2p25.3	55821	NM_018436	allantoicase	chr2:3744966-3745025	GO:0016787|GO:0004037	NM_018436	Hs.97899
A_23_P71864	0.00257105	-1.01814	-0.0259359	1.01814	down	-1.55882	-0.640459	1.55882	down	-1.53105	-0.614523	1.53105	down	137.195	158.036	257.869	197.105	256.285	230.984	575.367	180.508	219.254	-0.123744	-0.00881338	-0.139166	0	0.00344717	-0.197363	0.62374	0.312445	0.713468	FAM73B	Homo sapiens family with sequence similarity 73, member B (FAM73B), mRNA [NM_032809]	131833606	chr9	131833547	+	FALSE	hs|9q34.11	84895	NM_032809	family with sequence similarity 73, member B	chr9:131833547-131833606	GO:0016020|GO:0016021	NM_032809	Hs.632693
A_23_P259771	0.00197463	-1.10183	-0.1399	1.10183	down	1.33365	0.415377	1.33365	up	1.46945	0.555277	1.46945	up	1051.17	964.231	1362.65	1490.15	1427.46	1700.2	1603.41	967.191	1192.69	0	-0.214177	0.0974799	0.0372631	0.111218	0.154521	-0.528419	-0.470492	-0.363918	HEATR3	HEAT repeat containing 3 [Source:HGNC Symbol;Acc:26087] [ENST00000483299]	50140225	chr16	50140166	+	FALSE	hs|16q12.1	55027	AF462442	HEAT repeat containing 3	chr16:50140166-50140225	GO:0005488		Hs.313917
A_23_P388433	0.00329004	1.17811	0.236469	1.17811	up	1.4189	0.504775	1.4189	up	1.20439	0.268306	1.20439	up	2598.21	3751.84	4987.71	3713.79	3663.3	5623.51	3471.8	2102.23	2992.03	0.161346	0.318605	0.208482	0	-0.102015	0.0810404	-0.118705	-0.364271	-0.342917	C4orf3	Homo sapiens chromosome 4 open reading frame 3 (C4orf3), transcript variant 1, mRNA [NM_001170330]	120218473	chr4	120218414	-	FALSE	hs|4q26	401152	NM_001170330	chromosome 4 open reading frame 3	chr4:120218473-120218414	GO:0016020|GO:0016021	NM_001170330	Hs.173705
A_24_P944444	0.00397499	-1.20795	-0.27256	1.20795	down	1.77527	0.828042	1.77527	up	2.14444	1.1006	2.14444	up	190.321	268.086	373.637	501.946	422.911	426.008	569.998	164.984	276.485	-0.420498	0.204526	0	0.206983	0.0858654	0.308859	-0.916317	-1.15893	-0.624854	MAPKBP1	Homo sapiens mitogen-activated protein kinase binding protein 1 (MAPKBP1), transcript variant 1, mRNA [NM_014994]	42119083	chr15	42119024	+	FALSE	hs|15q15.1	23005	NM_014994	mitogen-activated protein kinase binding protein 1	chr15:42119024-42119083	GO:0007256	NM_014994	Hs.513661
A_23_P319874	0.00461269	-1.04916	-0.0692347	1.04916	down	-1.37095	-0.455181	1.37095	down	-1.30672	-0.385947	1.30672	down	110.808	76.686	106.116	65.9349	115.997	147.07	233.428	114.851	138.407	0	-0.0384888	-0.20442	0.129976	-0.100083	-0.0650979	0.267844	0.407712	0.447079	C3orf23	Homo sapiens chromosome 3 open reading frame 23 (C3orf23), transcript variant 3, mRNA [NM_001029840]	44400478	chr3	44400419	+	FALSE	hs|3p21.31	285343	NM_001029840	chromosome 3 open reading frame 23	chr3:44400419-44400478	GO:0005739	NM_001029840	Hs.55131
A_32_P32463	0.00709828	1.22591	0.293847	1.22591	up	2.78265	1.47646	2.78265	up	2.26987	1.18261	2.26987	up	181.045	151.8	197.885	377.884	229.986	196.05	301.255	120.96	206.176	0.134357	1.03316	0.239992	-0.150737	0	0.676704	-0.999461	-1.02931	-0.9931			26435658	chr8	26435599	-	FALSE	hs|8p21.2				chr8:026435658-026435599
A_24_P924494	0.00712274	1.94212	0.957632	1.94212	up	-1.30802	-0.387379	1.30802	down	-2.54032	-1.34501	2.54032	down	124.409	8.40146	5.35793	13.5454	5.7564	6.95944	784.946	18.1087	18.1747	0.237629	-0.0602523	0.0608121	-0.891664	-0.476694	-1.26635	0.72736	0.672967	0		Homo sapiens cDNA clone IMAGE:4610447, with apparent retained intron. [BC022390]	19438181	chr17	19438122	+	FALSE	hs|17p11.2		BC022390		chr17:19438122-19438181
A_24_P184388	0.00569181	1.12465	0.169474	1.12465	up	1.62301	0.698671	1.62301	up	1.44313	0.529197	1.44313	up	191.496	220.308	340.568	239.807	262.551	324.755	267.423	150.744	163.15	0.227341	0.000174642	0.250394	-0.112836	0	0.0823246	-0.718543	-0.63364	-0.265921	LRTOMT	Homo sapiens leucine rich transmembrane and 0-methyltransferase domain containing (LRTOMT), transcript variant 1, mRNA [NM_145309]	71807794	chr11	71807735	+	FALSE	hs|11q13.4	220074	NM_145309	leucine rich transmembrane and 0-methyltransferase domain containing	chr11:71807735-71807794	GO:0005737|GO:0016020|GO:0016206|GO:0007605|GO:0016021|GO:0005575|GO:0042135|GO:0042424|GO:0016740|GO:0060117	NM_145309	Hs.317243
A_24_P381379	0.00626224	2.12554	1.08783	2.12554	up	-4.43722	-2.14966	4.43722	down	-9.43147	-3.23748	9.43147	down	23.8601	28.0527	30.6987	25.7616	27.6877	37.5872	288.202	41.2539	43.2466	0.226846	0	-1.95069	-1.0131	-1.71206	-2.26215	1.59549	1.6866	1.44304		Homo sapiens cDNA FLJ13769 fis, clone PLACE4000222. [AK023831]	123572143	chr12	123572084	-	FALSE	hs|12q24.31		AK023831		chr12:123572143-123572084
A_24_P322229	0.00212047	-1.04156	-0.058741	1.04156	down	1.82735	0.869751	1.82735	up	1.90329	0.928492	1.90329	up	1030.29	1481.66	2091.76	1431.56	1961.97	1940.16	1289.5	723.806	813.18	-0.0981302	0.179118	0.132038	0	0.199402	0.189847	-1.03014	-0.47154	-0.894546	RASL10B	Homo sapiens RAS-like, family 10, member B (RASL10B), mRNA [NM_033315]	34069948	chr17	34069889	+	FALSE	hs|17q12	91608	NM_033315	RAS-like, family 10, member B	chr17:34069889-34069948	GO:0007165|GO:0005886|GO:0000166|GO:0007264|GO:0003924|GO:0005525	NM_033315	Hs.437035
A_23_P67971	0.0031279	-1.47616	-0.561854	1.47616	down	1.249	0.320778	1.249	up	1.84374	0.882632	1.84374	up	335.646	423.586	644.383	492.725	622.532	790.926	547.005	405.207	359.974	-0.0819645	0	0.340116	0.607846	0.651268	0.684599	-0.183844	-0.0386744	-0.481664	GALM	Homo sapiens galactose mutarotase (aldose 1-epimerase) (GALM), mRNA [NM_138801]	38961203	chr2	38961144	+	FALSE	hs|2p22.1	130589	NM_138801	galactose mutarotase (aldose 1-epimerase)	chr2:38961144-38961203	GO:0005737|GO:0004034|GO:0005975|GO:0030246|GO:0019318|GO:0016853	NM_138801	Hs.435012
A_23_P383698	0.000554097	-2.09456	-1.06665	2.09456	down	-2.1268	-1.08868	2.1268	down	-1.01539	-0.0220337	1.01539	down	265.074	335.145	672.473	354.054	626.561	599.166	484.733	426.846	419.523	-1.27941	-1.11971	-0.725169	0.00138664	0.0698156	0.00445825	0.210157	-0.0683957	0	LOC641298	Homo sapiens SMG1 homolog, phosphatidylinositol 3-kinase-related kinase pseudogene (LOC641298), non-coding RNA [NR_027154]	22494533	chr16	22494474	+	FALSE	hs|16p12.2	641298	NR_027154	SMG1 homolog, phosphatidylinositol 3-kinase-related kinase pseudogene	chr16:22494474-22494533		NR_027154
A_23_P140821	0.00251801	1.09083	0.125423	1.09083	up	2.03679	1.0263	2.03679	up	1.8672	0.900873	1.8672	up	193.141	208.876	329.176	172.876	254.351	279.841	256.09	115.22	118.021	0.580216	-0.0749466	0.408338	0	0.279476	0.257862	-0.825604	-0.649565	-0.690111	PARD6A	Homo sapiens par-6 partitioning defective 6 homolog alpha (C. elegans) (PARD6A), transcript variant 1, mRNA [NM_016948]	67696221	chr16	67696162	+	FALSE	hs|16q22.1	50855	NM_016948	par-6 partitioning defective 6 homolog alpha (C. elegans)	chr16:67696162-67696221	GO:0005515|GO:0030054|GO:0005886|GO:0034329|GO:0005634|GO:0001726|GO:0045216|GO:0045217|GO:0005829|GO:0043234|GO:0030742|GO:0005737|GO:0007049|GO:0070830|GO:0005080|GO:0016032|GO:0017048|GO:0005923|GO:0005938|GO:0051301|GO:0008134	NM_016948	Hs.112933
A_23_P206806	0.0086737	1.88369	0.91356	1.88369	up	-1.5909	-0.669844	1.5909	down	-2.99676	-1.5834	2.99676	down	138.611	119.698	204.802	145.704	176.009	207.01	330.345	207.421	187.811	0.493624	0	-0.231115	-1.14138	-0.910337	-0.426451	0.444634	1.29658	0.530831	ITGAL	Homo sapiens integrin, alpha L (antigen CD11A (p180), lymphocyte function-associated antigen 1; alpha polypeptide) (ITGAL), transcript variant 1, mRNA [NM_002209]	30533967	chr16	30533908	+	FALSE	hs|16p11.2	3683	NM_002209	integrin, alpha L (antigen CD11A (p180), lymphocyte function-associated antigen 1; alpha polypeptide)	chr16:30533908-30533967	GO:0005515|GO:0005886|GO:0006928|GO:0050900|GO:0050850|GO:0006954|GO:0042102|GO:0007159|GO:0004872|GO:0007155|GO:0050839|GO:0007157|GO:0001772|GO:0008305|GO:0022409|GO:0046982|GO:0007165|GO:0016020|GO:0007596|GO:0007229|GO:0002291|GO:0050776|GO:0050798|GO:0016021|GO:0009897	NM_002209	Hs.174103
A_23_P42595	0.00202561	2.06484	1.04603	2.06484	up	-3.51938	-1.81532	3.51938	down	-7.26694	-2.86135	7.26694	down	27.0689	27.0471	23.9827	26.9249	26.1164	24.9665	106.841	33.5827	37.6095	0.15003	0	-1.42729	-1.04013	-1.61692	-1.75829	1.47263	1.29264	1.40344			150845216	chr7	150845157	-	FALSE	hs|7q36.1				chr7:150845216-150845157
A_32_P34844	0.00173405	1.80955	0.855628	1.80955	up	-6.26267	-2.64678	6.26267	down	-11.3326	-3.50241	11.3326	down	17.7395	17.5656	12.6874	19.0146	12.4268	11.5052	944.212	24.3009	24.2751	0.165626	0	-1.08326	-1.19838	-1.08047	-1.20567	3.39093	1.54427	2.0875	ADAMTS18	Homo sapiens ADAM metallopeptidase with thrombospondin type 1 motif, 18 (ADAMTS18), mRNA [NM_199355]	77316423	chr16	77316364	-	FALSE	hs|16q23.1	170692	NM_199355	ADAM metallopeptidase with thrombospondin type 1 motif, 18	chr16:77316423-77316364	GO:0006508|GO:0005578|GO:0008270|GO:0008233|GO:0005576|GO:0004222|GO:0046872	NM_199355	Hs.188746
A_23_P253321	0.00604416	-1.176	-0.233894	1.176	down	-2.63731	-1.39907	2.63731	down	-2.2426	-1.16517	2.2426	down	64.7739	71.1804	103.513	90.1346	92.5715	111.658	259.117	78.0232	88.4276	-0.393176	-0.466288	0.0898873	0	-0.0110433	-0.0568514	1.72491	1.02064	0.682077	PNOC	Homo sapiens prepronociceptin (PNOC), mRNA [NM_006228]	28200831	chr8	28200772	+	FALSE	hs|8p21.1	5368	NM_006228	prepronociceptin	chr8:28200772-28200831	GO:0007165|GO:0007218|GO:0001515|GO:0007268|GO:0005576|GO:0005184|GO:0007600	NM_006228	Hs.88218
A_32_P83098	0.00501923	-1.12687	-0.172319	1.12687	down	-3.32238	-1.73222	3.32238	down	-2.94833	-1.5599	2.94833	down	22.0519	20.4908	21.0709	11.8859	19.172	17.7395	412.237	32.1029	27.6352	-0.165405	-0.0251259	-1.03591	0.0214207	0	-0.730906	1.05376	1.29539	1.62106	SCNN1B	Homo sapiens sodium channel, nonvoltage-gated 1, beta (SCNN1B), mRNA [NM_000336]	23391754	chr16	23391444	+	FALSE	hs|16p12.2	6338	NM_000336	sodium channel, nonvoltage-gated 1, beta	chr16:23391444-23391754	GO:0005515|GO:0001666|GO:0007588|GO:0035313|GO:0005886|GO:0050699|GO:0005624|GO:0015280|GO:0016324|GO:0050909|GO:0002028|GO:0016021|GO:0006814|GO:0005216|GO:0050896|GO:0009897|GO:0006811	NM_000336	Hs.414614
A_24_P346126	0.00314187	1.26456	0.338632	1.26456	up	1.46291	0.548844	1.46291	up	1.15686	0.210212	1.15686	up	4165.1	2930.16	4334.5	3475.78	3243.54	4606.19	3896.66	2501.98	3947.13	0.340211	0.318216	0.312955	0	0.0403377	-0.0848511	-0.260921	-0.392095	-0.0221347	SERF1A	Homo sapiens small EDRK-rich factor 1A (telomeric) (SERF1A), transcript variant 2, mRNA [NM_022968]	70203846	chr5	70203787	+	FALSE	hs|5q13.2	8293	NM_022968	small EDRK-rich factor 1A (telomeric)	chr5:70203787-70203846		NM_022968	Hs.726820
A_24_P119505	0.00849897	1.15446	0.20722	1.15446	up	-2.38486	-1.2539	2.38486	down	-2.75322	-1.46112	2.75322	down	15.2725	9.7723	6.73799	8.84592	5.86564	4.88044	267.533	18.0583	18.599	0	0.409531	-0.483656	-0.303609	-0.241941	-0.150234	0.654086	1.35293	1.68057		Homo sapiens cDNA clone IMAGE:3836116, partial cds. [BC007399]	114189971	chr12	114189912	-	FALSE	hs|12q24.13		BC007399		chr12:114189971-114189912			Hs.211461
A_32_P96564	0.00474001	1.37763	0.462185	1.37763	up	-2.65974	-1.41128	2.65974	down	-3.66412	-1.87347	3.66412	down	15.7897	10.1787	5.45818	8.94338	5.96748	4.94735	849.687	15.041	20.4771	-0.115352	0.333166	0	-0.464094	-0.395848	-0.308798	0.695662	2.10308	1.65293		qm68c11.x1 Soares_placenta_8to9weeks_2NbHP8to9W Homo sapiens cDNA clone IMAGE:1893908 3', mRNA sequence [AI280298]	163990926	chr6	163990867	-	FALSE	hs|6q26		AI280298		chr6:163990926-163990867			Hs.703151
A_23_P419624	0.00236514	1.05263	0.0739994	1.05263	up	1.47938	0.56499	1.47938	up	1.40541	0.49099	1.40541	up	1332.9	1371.31	2055.9	1257.21	1853.78	2520.05	1433.37	1127.94	1426.69	-0.0170584	0.286664	0.0489014	0.0432433	0	0.0532653	-0.575407	-0.483991	-0.317064	BLCAP	Homo sapiens bladder cancer associated protein (BLCAP), transcript variant 1, mRNA [NM_006698]	36146328	chr20	36146269	-	FALSE	hs|20q11.23	10904	NM_006698	bladder cancer associated protein	chr20:36146328-36146269	GO:0007049|GO:0016020|GO:0006915|GO:0016021	NM_006698	Hs.472651
A_32_P5205	0.00463644	1.66993	0.739785	1.66993	up	-2.38651	-1.2549	2.38651	down	-3.9853	-1.99469	3.9853	down	37.3991	44.7401	64.9313	46.0045	51.4538	60.4514	110.484	51.4705	59.1461	0	-0.212764	0.409619	-1.42066	-0.516975	-0.0848657	1.24455	1.56205	1.15497	LOC100506689	PREDICTED: Homo sapiens hypothetical LOC100506689 (LOC100506689), partial miscRNA [XR_108871]	102473746	chr8	102473687	-	FALSE	hs|8q22.3	100506689	XR_108871	hypothetical LOC100506689	chr8:102473746-102473687		XR_108871
A_23_P54556	0.00640644	-1.12728	-0.172848	1.12728	down	1.49362	0.578817	1.49362	up	1.68373	0.751665	1.68373	up	827.591	951.444	1533.87	1377.12	1183.67	1669.66	1194.5	649.595	767.737	0	-0.301906	0.286993	0.222813	0.141625	0.139193	-0.53054	-0.488184	-0.732639	MKL2	Homo sapiens MKL/myocardin-like 2 (MKL2), mRNA [NM_014048]	14360605	chr16	14360546	+	FALSE	hs|16p13.12	57496	NM_014048	MKL/myocardin-like 2	chr16:14360546-14360605	GO:0005515|GO:0006355|GO:0007517|GO:0045944|GO:0003713|GO:0007275|GO:0005634|GO:0003676|GO:0045844|GO:0030154|GO:0042802	NM_014048	Hs.49143
A_23_P54170	0.00743034	-1.31653	-0.396737	1.31653	down	1.20343	0.26715	1.20343	up	1.58435	0.663887	1.58435	up	273.43	324.422	531.963	356.345	453.581	537.427	411.651	287.001	274.771	-0.166585	0	0.34478	0.444346	0.514558	0.409501	-0.310732	-0.108059	-0.204466	MED6	Homo sapiens mediator complex subunit 6 (MED6), mRNA [NM_005466]	71060050	chr14	71059684	-	FALSE	hs|14q24.2	10001	NM_005466	mediator complex subunit 6	chr14:71060050-71059684	GO:0010467|GO:0001104|GO:0006357|GO:0045944|GO:0016592|GO:0003713|GO:0005654|GO:0005634|GO:0003677	NM_005466	Hs.497353
A_23_P121695	0.00354455	2.29263	1.197	2.29263	up	-2.1024	-1.07204	2.1024	down	-4.82002	-2.26904	4.82002	down	14.7856	10.1019	6.67393	12.0819	8.7837	7.05901	131.073	16.7296	22.238	0	0.277054	-0.651743	-1.25702	-1.43342	-1.27526	0.197297	1.51415	1.12997	CXCL13	Homo sapiens chemokine (C-X-C motif) ligand 13 (CXCL13), mRNA [NM_006419]	78532705	chr4	78532646	+	FALSE	hs|4q21.1	10563	NM_006419	chemokine (C-X-C motif) ligand 13	chr4:78532646-78532705	GO:0035768|GO:0048248|GO:0007267|GO:0033625|GO:0007204|GO:0005615|GO:0002518|GO:0048535|GO:0006955|GO:0031724|GO:0006935|GO:0002920|GO:0048603|GO:0002467|GO:0008201|GO:0048018|GO:0042742|GO:0008009|GO:0043066|GO:0046982|GO:0010820|GO:0045765|GO:0005625|GO:0005576|GO:0032861|GO:0002544|GO:0033634|GO:0031735|GO:0007165|GO:0035754	NM_006419	Hs.100431
A_23_P35099	0.00257821	-1.06441	-0.0900584	1.06441	down	1.3048	0.383826	1.3048	up	1.38884	0.473884	1.38884	up	1754.26	1916.1	2789.09	2083.05	2489.45	3051.07	2053.36	1816.27	1966.89	0.111054	-0.0191718	0.0135898	0.130998	0	0.24465	-0.457291	-0.252321	-0.336394	MRTO4	Homo sapiens mRNA turnover 4 homolog (S. cerevisiae) (MRTO4), mRNA [NM_016183]	19585244	chr1	19585185	+	FALSE	hs|1p36.13	51154	NM_016183	mRNA turnover 4 homolog (S. cerevisiae)	chr1:19585185-19585244	GO:0005622|GO:0031965|GO:0042254|GO:0005730|GO:0005634	NM_016183	Hs.463797
A_23_P164047	0.00463574	1.28961	0.366937	1.28961	up	1.77096	0.824528	1.77096	up	1.37325	0.45759	1.37325	up	5040.66	5216.45	8824.49	6433.56	6260.66	6219.31	3880.54	2766.45	3822.23	0.553422	0.0586128	0.424229	0.117123	0	-0.181671	-0.614456	-0.424415	-0.398449	MMD	Homo sapiens monocyte to macrophage differentiation-associated (MMD), mRNA [NM_012329]	53470223	chr17	53470164	-	FALSE	hs|17q22	23531	NM_012329	monocyte to macrophage differentiation-associated	chr17:53470223-53470164	GO:0016020|GO:0005887|GO:0031902|GO:0019835|GO:0005624|GO:0004872|GO:0005765|GO:0005768	NM_012329	Hs.463483
A_23_P68665	0.00681475	-1.04095	-0.0579036	1.04095	down	1.17602	0.233918	1.17602	up	1.22418	0.291821	1.22418	up	711.045	1111.65	1682.25	1284.01	1510.11	1414.06	901.048	781.811	784.078	0	-0.0179044	0.00641066	0.0432243	0.0190611	0.0999315	-0.334229	-0.278338	-0.10068	ADRM1	Homo sapiens adhesion regulating molecule 1 (ADRM1), transcript variant 1, mRNA [NM_007002]	60883161	chr20	60883102	+	FALSE	hs|20q13.33	11047	NM_007002	adhesion regulating molecule 1	chr20:60883102-60883161	GO:0043248|GO:0006368|GO:0005737|GO:0000502|GO:0005887|GO:0061133|GO:0010950|GO:0070628|GO:0005624|GO:0005634|GO:0002020	NM_007002	Hs.90107
A_23_P122924	0.00874344	-1.13103	-0.177642	1.13103	down	1.92064	0.941585	1.92064	up	2.17231	1.11923	2.17231	up	969.436	1410.79	1732.47	1909.51	1774.67	1882.7	1414.1	700.118	1183.47	-0.320918	0.313915	0.020753	0	0.0591174	0.487559	-0.885734	-1.29113	-0.634139	INHBA	Homo sapiens inhibin, beta A (INHBA), mRNA [NM_002192]	41729305	chr7	41729246	-	FALSE	hs|7p14.1	3624	NM_002192	inhibin, beta A	chr7:41729305-41729246	GO:0005515|GO:0042541|GO:0030308|GO:0042701|GO:0030154|GO:0042802|GO:0071397|GO:0045077|GO:0001942|GO:0046982|GO:0046882|GO:0006952|GO:0046881|GO:0046880|GO:0045786|GO:0032925|GO:0005125|GO:0045650|GO:0005179|GO:0045648|GO:0045893|GO:0040007|GO:0008083|GO:0060279|GO:0045578|GO:0008285|GO:0007267|GO:0071372|GO:0000082|GO:0001541|GO:0002244|GO:0045944|GO:0061029|GO:0042476|GO:0060021|GO:0007050|GO:…	NM_002192	Hs.583348
A_23_P117943	0.0028709	1.09232	0.127398	1.09232	up	1.6321	0.706728	1.6321	up	1.49415	0.579329	1.49415	up	2084.9	1968.09	3003.43	2520.42	2442.16	3295.37	2318.84	1662.8	2066.15	0.232208	0.0859309	0.289179	-0.0826215	0	0.307744	-0.591963	-0.35348	-0.567422			1469890	chr16	1469829	-	FALSE	hs|16p13.3				chr16:001469890-001469829
A_23_P331063	0.00356737	1.59898	0.677156	1.59898	up	-5.55558	-2.47394	5.55558	down	-8.88328	-3.15109	8.88328	down	12.7991	11.7066	6.65047	9.13973	7.63305	5.19453	1616.69	16.1312	21.4633	0	-0.090938	0.318055	-0.521077	-0.95909	-0.324182	3.8511	2.15697	1.64086	PGK2	Homo sapiens phosphoglycerate kinase 2 (PGK2), mRNA [NM_138733]	49754099	chr6	49754040	-	FALSE	hs|6p12.3	5232	NM_138733	phosphoglycerate kinase 2	chr6:49754099-49754040	GO:0016310|GO:0005737|GO:0004618|GO:0000166|GO:0005524|GO:0016740|GO:0006096|GO:0005829	NM_138733	Hs.367727
A_24_P219971	0.00964602	1.05737	0.0804853	1.05737	up	1.32211	0.402847	1.32211	up	1.25038	0.322362	1.25038	up	3068.05	2556.5	4042.87	2906.84	3162.99	4785.51	3212.67	2388.04	2770.52	0.193999	0	0.238067	-0.0147429	0.035122	0.170231	-0.139443	-0.287191	-0.349841	C20orf11	Homo sapiens chromosome 20 open reading frame 11 (C20orf11), mRNA [NM_017896]	61579740	chr20	61579681	+	FALSE	hs|20q13.33	54994	NM_017896	chromosome 20 open reading frame 11	chr20:61579681-61579740	GO:0005515|GO:0005634	NM_017896	Hs.353013
A_24_P122137	0.00210879	-2.60716	-1.38248	2.60716	down	1.41728	0.503125	1.41728	up	3.69507	1.8856	3.69507	up	193.595	209.544	358.926	436.738	532.204	499.844	352.141	154.197	189.71	0.00974238	-0.526961	0	1.06051	1.17959	1.39011	-0.0646384	-0.84444	-1.11752	LIF	Homo sapiens leukemia inhibitory factor (cholinergic differentiation factor) (LIF), mRNA [NM_002309]	30636772	chr22	30636713	-	FALSE	hs|22q12.2	3976	NM_002309	leukemia inhibitory factor (cholinergic differentiation factor)	chr22:30636772-30636713	GO:0060426|GO:0008284|GO:0008285|GO:0060041|GO:0031100|GO:0060290|GO:0050731|GO:0033141|GO:0005615|GO:0046888|GO:0048644|GO:0046697|GO:0006955|GO:0033138|GO:0048666|GO:0045944|GO:0072307|GO:0070373|GO:0051461|GO:0005146|GO:0048286|GO:0007566|GO:0060708|GO:0042517|GO:0060707|GO:0060135|GO:0005102|GO:0042511|GO:0007275|GO:0005576|GO:0045651|GO:0005125|GO:0072108|GO:0048861|GO:0048711|GO:0001974|GO:…	NM_002309	Hs.2250
A_23_P154150	0.0092462	2.45896	1.29805	2.45896	up	-2.3375	-1.22497	2.3375	down	-5.74783	-2.52302	5.74783	down	14.8061	15.3692	21.3841	14.1548	8.07743	14.3839	85.2621	22.6554	28.6281	0	-0.0867033	0.474984	-1.07057	-0.522795	-1.9125	0.597737	2.24039	1.22506	GPR1	Homo sapiens G protein-coupled receptor 1 (GPR1), transcript variant 1, mRNA [NM_005279]	207041323	chr2	207041264	-	FALSE	hs|2q33.3	2825	NM_005279	G protein-coupled receptor 1	chr2:207041323-207041264	GO:0007186|GO:0005886|GO:0005887|GO:0004930|GO:0004872	NM_005279	Hs.184907
A_23_P152406	0.00293609	1.02277	0.0324873	1.02277	up	1.60493	0.682509	1.60493	up	1.56919	0.650022	1.56919	up	168.534	261.532	565.853	389.656	539.844	377.291	294.022	152.113	149.155	0.113416	0.0182037	0.0369807	0	-0.0184928	0.0896309	-0.364749	-0.887942	-0.626237	CAPNS2	Homo sapiens calpain, small subunit 2 (CAPNS2), mRNA [NM_032330]	55601437	chr16	55601378	+	FALSE	hs|16q12.2	84290	NM_032330	calpain, small subunit 2	chr16:55601378-55601437	GO:0005737|GO:0005886|GO:0005509	NM_032330	Hs.660027
A_23_P73632	0.000222887	-1.62767	-0.702806	1.62767	down	4.99274	2.31983	4.99274	up	8.12652	3.02264	8.12652	up	158.407	146.509	344.609	348.43	409.884	364.783	179.967	72.5801	91.9883	0	-0.856239	0.299724	0.434724	0.662912	0.454267	-2.22707	-2.86924	-2.41969	NR0B1	Homo sapiens nuclear receptor subfamily 0, group B, member 1 (NR0B1), mRNA [NM_000475]	30322698	chrX	30322639	-	FALSE	hs|Xp21.2	190	NM_000475	nuclear receptor subfamily 0, group B, member 1	chrX:30322698-30322639	GO:0005515|GO:0008406|GO:0034339|GO:0010467|GO:0006694|GO:0030325|GO:0003723|GO:0021983|GO:0035258|GO:0033144|GO:0003707|GO:0043434|GO:0003706|GO:0050682|GO:0005634|GO:0007283|GO:0043433|GO:0042803|GO:0060008|GO:0005737|GO:0003690|GO:0008104|GO:0042788|GO:0030238|GO:0004879|GO:0010033|GO:0003714|GO:0019904|GO:0006950|GO:0005624|GO:0032448|GO:0000122|GO:0021854|GO:0003677|GO:0043565|GO:0033327|GO:…	NM_000475	Hs.268490
A_23_P154840	0.00276948	-1.13692	-0.185133	1.13692	down	1.28919	0.36646	1.28919	up	1.4657	0.551593	1.4657	up	29879.5	28314.7	41957.5	43850	40367.1	43393.8	29114.8	24634.1	30323.4	0	-0.27689	0.0207291	0.0681763	0.0820102	0.149052	-0.497721	-0.515869	-0.341951	SOD1	Homo sapiens superoxide dismutase 1, soluble (SOD1), mRNA [NM_000454]	33040949	chr21	33040890	+	FALSE	hs|21q22.11	6647	NM_000454	superoxide dismutase 1, soluble	chr21:33040890-33040949	GO:0045859|GO:0005515|GO:0042542|GO:0008219|GO:0030346|GO:0060047|GO:0009408|GO:0007605|GO:0006801|GO:0060088|GO:0033081|GO:0006749|GO:0048538|GO:0001819|GO:0007283|GO:0019226|GO:0048678|GO:0005615|GO:0042803|GO:0060087|GO:0006879|GO:0043524|GO:0001895|GO:0005759|GO:0019430|GO:0043025|GO:0031667|GO:0002262|GO:0006979|GO:0004784|GO:0005507|GO:0007566|GO:0007569|GO:0030168|GO:0001890|GO:0043085|GO:…	NM_000454	Hs.443914
A_23_P309973	0.00875509	1.2613	0.334909	1.2613	up	-2.36146	-1.23968	2.36146	down	-2.97851	-1.57459	2.97851	down	17.7045	19.6225	11.3799	17.1079	16.5323	8.3584	201.746	24.6942	31.0742	0.246794	0	-0.706919	-0.715207	-0.679888	-0.0697579	0.821115	1.54511	0.89269	C14orf50	Homo sapiens chromosome 14 open reading frame 50 (C14orf50), mRNA [NM_172365]	65054969	chr14	65054910	+	FALSE	hs|14q23.3	145376	NM_172365	chromosome 14 open reading frame 50	chr14:65054910-65054969		NM_172365	Hs.144696
A_24_P50801	0.00755437	-1.02198	-0.0313697	1.02198	down	-2.48788	-1.31492	2.48788	down	-2.43437	-1.28355	2.43437	down	39.0028	40.2852	64.4204	69.6449	50.1885	51.7652	378.473	43.6043	44.9512	0.0273436	-0.183329	-0.26564	-0.209552	-0.117964	0	1.8561	0.660852	1.00617	NRP2	Homo sapiens neuropilin 2 (NRP2), transcript variant 6, mRNA [NM_201264]	206608139	chr2	206608080	+	FALSE	hs|2q33.3	8828	NM_201264	neuropilin 2	chr2:206608080-206608139	GO:0048010|GO:0030424|GO:0005886|GO:0001755|GO:0050919|GO:0005624|GO:0007275|GO:0071445|GO:0001525|GO:0046872|GO:0030154|GO:0007399|GO:0007507|GO:0017154|GO:0007411|GO:0004872|GO:0005021|GO:0016021|GO:0007155|GO:0008201	NM_201264	Hs.471200
A_23_P384023	0.00714466	-2.01997	-1.01434	2.01997	down	-3.13013	-1.64622	3.13013	down	-1.54959	-0.631886	1.54959	down	33.3281	21.5091	44.0891	74.3415	48.9766	53.2979	475.616	30.6689	35.5848	-1.48533	-0.751206	-0.273047	-0.0231041	0	0.55653	0.832062	0.910883	0.686138	GLIS3	Homo sapiens GLIS family zinc finger 3 (GLIS3), transcript variant 1, mRNA [NM_001042413]	3829334	chr9	3828374	-	FALSE	hs|9p24.2	169792	NM_001042413	GLIS family zinc finger 3	chr9:3829334-3828374	GO:0005622|GO:0003700|GO:0006366|GO:0045944|GO:0044428|GO:0008270|GO:0005634|GO:0000122|GO:0003677|GO:0046872	NM_001042413	Hs.162125
A_24_P187355	0.00758119	1.29975	0.378238	1.29975	up	-5.09591	-2.34934	5.09591	down	-6.62343	-2.72758	6.62343	down	39.6655	48.2795	97.8511	60.9755	96.7881	97.0033	501.153	51.6263	50.1804	0.268118	0	-1.74864	-1.18914	-0.54345	-0.882648	2.48455	1.50572	1.57722			30774144	chr9	30774080	+	FALSE	hs|9p21.1				chr9:030774080-030774144
A_24_P945188	0.00492078	1.93607	0.953132	1.93607	up	-2.04824	-1.03438	2.04824	down	-3.96554	-1.98752	3.96554	down	19.1639	9.87349	17.5939	10.4292	11.3641	11.1307	457.67	14.3267	18.8131	0.58119	0	-0.0954531	-1.14593	-0.777918	-0.449806	0.575919	1.75844	1.25453		602379048F1 NIH_MGC_92 Homo sapiens cDNA clone IMAGE:4509947 5', mRNA sequence [BG259015]					FALSE			BG259015					Hs.449186
A_23_P105886	0.0063421	2.61612	1.38743	2.61612	up	-1.42735	-0.513342	1.42735	down	-3.73413	-1.90077	3.73413	down	24.1448	10.5551	11.0947	14.2531	12.7688	16.0859	155.475	32.147	34.1458	0	0.558251	-0.806904	-1.33632	-1.79844	-1.27618	0.0547528	0.60087	0.635751	C1QTNF9B	Homo sapiens C1q and tumor necrosis factor related protein 9B (C1QTNF9B), mRNA [NM_001007537]	24465654	chr13	24465595	-	FALSE	hs|13q12.12	387911	NM_001007537	C1q and tumor necrosis factor related protein 9B	chr13:24465654-24465595	GO:0005581|GO:0005576	NM_001007537	Hs.642624
A_24_P40737	0.00031795	2.87232	1.52222	2.87232	up	-3.67108	-1.87621	3.67108	down	-10.5445	-3.39842	10.5445	down	44.6693	12.8942	15.4415	20.2222	13.1314	12.7551	1469.17	26.4564	24.7543	0	0.691266	-0.20306	-1.42116	-1.24248	-1.41481	1.39084	2.0602	2.66579	PRLR	Homo sapiens prolactin receptor (PRLR), transcript variant 3, mRNA [NM_001204316]	35049494	chr5	35049435	-	FALSE	hs|5p13.2	5618	NM_001204316	prolactin receptor	chr5:35049494-35049435	GO:0042978|GO:0005515|GO:0006694|GO:0042977|GO:0004896|GO:0009986|GO:0004925|GO:0007566|GO:0005576|GO:0006916|GO:0046872|GO:0042803|GO:0042110|GO:0007171|GO:0007595|GO:0016020|GO:0004872|GO:0016021|GO:0017046|GO:0007166	NM_001204316	Hs.368587
A_24_P238786	5.25045e-05	1.77696	0.829409	1.77696	up	-2.74028	-1.45433	2.74028	down	-4.86937	-2.28373	4.86937	down	51.4864	69.1364	73.4562	74.8649	83.8425	68.5414	174.568	68.228	73.2488	0.392225	0	-0.0449934	-0.465713	-0.620037	-1.05525	1.55225	1.64553	1.51242			29630211	chr16	29630152	-	FALSE	hs|16p11.2				chr16:029630211-029630152
A_24_P942469	0.00614193	1.2173	0.283679	1.2173	up	-1.12216	-0.166274	1.12216	down	-1.366	-0.449953	1.366	down	1521.79	1548.01	1966.72	1140.83	1323.46	2092.16	2036.85	1790.73	1610.33	-9.65595e-06	0.0916641	0	-0.233775	-0.225926	-0.299682	0.193046	0.372962	0.0244693	SPAG9	Homo sapiens sperm associated antigen 9 (SPAG9), transcript variant 1, mRNA [NM_001130528]	49040113	chr17	49040054	-	FALSE	hs|17q21.33	9043	NM_001130528	sperm associated antigen 9	chr17:49040113-49040054	GO:0005515|GO:0048471|GO:0030335|GO:0090074|GO:0001669|GO:0007257|GO:0007283|GO:0031410|GO:0005829|GO:0042692|GO:0005737|GO:0051149|GO:0045666|GO:0042147|GO:0051260|GO:0048273|GO:0016021|GO:0019894|GO:0008432|GO:0043548	NM_001130528	Hs.463439
A_24_P98762	0.0093714	1.97163	0.97939	1.97163	up	-1.90032	-0.926246	1.90032	down	-3.74674	-1.90564	3.74674	down	12.6816	9.23778	6.5469	8.73851	8.21762	7.62016	207.635	17.2867	16.1553	0.0100299	0	-0.687606	-0.593934	-1.43943	-1.58238	0.121966	0.811941	1.16725	PPP2R1B	Homo sapiens protein phosphatase 2, regulatory subunit A, beta (PPP2R1B), transcript variant 1, mRNA [NM_002716]	111608719	chr11	111608660	-	FALSE	hs|11q23.1	5519	NM_002716	protein phosphatase 2, regulatory subunit A, beta	chr11:111608719-111608660	GO:0005515	NM_002716	Hs.584790
A_24_P462725	0.00987907	-1.34856	-0.431419	1.34856	down	-1.46242	-0.548356	1.46242	down	-1.08443	-0.116936	1.08443	down	898.313	619.268	1109.06	904.751	976.589	1841.2	1913.13	1000.95	1404.2	-0.389828	-0.334255	-0.226347	0.199525	-0.0529624	0.197265	0.360859	0	0.333778		Homo sapiens cDNA FLJ13266 fis, clone OVARC1000960. [AK023328]	50661550	chr15	50661491	+	FALSE	hs|15q21.2		AK023328		chr15:50661491-50661550			Hs.560351
A_23_P136116	0.00400559	1.7135	0.776945	1.7135	up	-2.87938	-1.52576	2.87938	down	-4.93381	-2.3027	4.93381	down	39.8698	35.3951	44.0129	35.9022	30.7229	43.7772	470.109	41.4655	43.3925	0.182163	0	-0.254236	-1.11416	-0.977224	-0.311523	2.32465	0.897959	1.28259	AGMO	Homo sapiens alkylglycerol monooxygenase (AGMO), mRNA [NM_001004320]	15405225	chr7	15405166	-	FALSE	hs|7p21.2	392636	NM_001004320	alkylglycerol monooxygenase	chr7:15405225-15405166	GO:0016020|GO:0005506|GO:0050479|GO:0005783|GO:0016491|GO:0005789|GO:0046485|GO:0006633|GO:0016021|GO:0006643	NM_001004320	Hs.670634
A_24_P804667	0.00238816	1.16189	0.216478	1.16189	up	1.82076	0.864539	1.82076	up	1.56706	0.648061	1.56706	up	268.61	366.669	452.412	412.802	452.456	433.293	389.154	222.227	250.879	0.217174	0.117007	0.118312	-0.322799	0.125858	0	-0.598031	-0.607894	-0.935199	METTL12	Homo sapiens methyltransferase like 12 (METTL12), nuclear gene encoding mitochondrial protein, mRNA [NM_001043229]	62434374	chr11	62434315	+	FALSE	hs|11q12.3	751071	NM_001043229	methyltransferase like 12	chr11:62434315-62434374	GO:0005739|GO:0008168|GO:0008152|GO:0016740	NM_001043229	Hs.640726
A_24_P186664	0.00158871	1.15642	0.209667	1.15642	up	-2.62617	-1.39296	2.62617	down	-3.03696	-1.60263	3.03696	down	34.4045	48.7369	74.0136	61.5075	67.9825	58.6176	161.936	47.0448	52.9401	-0.0416579	-0.560455	0.247425	0	-0.360791	-0.6229	1.08965	1.46544	1.26911			146791774	chr1	146791714	+	FALSE	hs|1q21.1				chr1:146791714-146791774
A_32_P814853	0.00486901	3.23878	1.69545	3.23878	up	-2.05232	-1.03725	2.05232	down	-6.64701	-2.73271	6.64701	down	20.6308	9.99478	6.73933	21.1705	14.5501	7.00173	185.039	19.0242	19.5263	-0.361134	0.645605	0	-1.88508	-2.0477	-0.869109	0.420405	1.1456	1.83023		Homo sapiens clone PP1563 unknown mRNA. [AF217983]	64794754	chr2	64780543	-	FALSE	hs|2p14		AF217983		chr2:64794754-64780543
A_23_P368886	0.0078028	1.32332	0.404163	1.32332	up	-3.45611	-1.78915	3.45611	down	-4.57355	-2.19331	4.57355	down	24.2285	25.802	21.8098	11.3538	22.109	29.1186	192.095	24.0286	28.9589	0	-0.496571	-1.02123	0.0227432	-1.45488	-1.29816	1.14559	1.07358	1.63049	CHSY3	Homo sapiens chondroitin sulfate synthase 3 (CHSY3), mRNA [NM_175856]	129521367	chr5	129521308	+	FALSE	hs|5q23.3	337876	NM_175856	chondroitin sulfate synthase 3	chr5:129521308-129521367	GO:0005794|GO:0016758|GO:0016020|GO:0032580|GO:0016021|GO:0050510|GO:0047238|GO:0046872|GO:0016740	NM_175856	Hs.213137
A_23_P64019	0.0045869	1.04292	0.0606222	1.04292	up	1.68427	0.752121	1.68427	up	1.61496	0.691499	1.61496	up	1320.67	985.258	1575.02	1117.33	1245.22	2058.74	1317.11	917.885	1166.73	0.167922	-0.0678853	0.321937	0	0.0852804	0.154826	-0.88324	-0.409187	-0.541962	MTMR2	Homo sapiens myotubularin related protein 2 (MTMR2), transcript variant 2, mRNA [NM_201278]	95567472	chr11	95567413	-	FALSE	hs|11q21	8898	NM_201278	myotubularin related protein 2	chr11:95567472-95567413	GO:0005515|GO:0030424|GO:0005774|GO:0051262|GO:0060079|GO:0014069|GO:0005634|GO:0042803|GO:0005829|GO:0008021|GO:0005737|GO:0006470|GO:0043197|GO:0016787|GO:0016020|GO:0045806|GO:0004437|GO:0008138|GO:0004725|GO:0002091	NM_201278	Hs.181326
A_24_P190877	0.00934734	1.26537	0.339554	1.26537	up	2.4417	1.28789	2.4417	up	1.92964	0.948334	1.92964	up	146.656	159.944	200.458	169.859	160.987	178.32	224.429	79.5792	103.466	0.848701	0.00137721	0.326829	0	0.350142	-0.191896	-0.53777	-1.02511	-1.12387	TRMT1L	Homo sapiens TRM1 tRNA methyltransferase 1-like (TRMT1L), transcript variant 1, mRNA [NM_030934]	185087449	chr1	185087390	-	FALSE	hs|1q25.3	81627	NM_030934	TRM1 tRNA methyltransferase 1-like	chr1:185087449-185087390	GO:0005622|GO:0004809|GO:0003723|GO:0007610|GO:0008270|GO:0046872|GO:0008033	NM_030934	Hs.107149
A_24_P417267	0.00543903	1.58966	0.668716	1.58966	up	-3.15626	-1.65821	3.15626	down	-5.01736	-2.32693	5.01736	down	37.6731	36.9818	38.5248	41.94	37.4743	37.3864	201.532	40.9286	49.2273	0.117806	0	-1.1779	-0.440575	-1.6709	-0.954759	1.48187	1.20594	1.22674	C22orf37	PREDICTED: Homo sapiens chromosome 22 open reading frame 37 (C22orf37), miscRNA [XR_109694]	18261757	chr22	18261698	+	FALSE	hs|22q11.21	200298	XR_109694	chromosome 22 open reading frame 37	chr22:18261698-18261757		XR_109694	Hs.517397
A_24_P508410	0.0066615	1.1371	0.18536	1.1371	up	-1.08885	-0.122807	1.08885	down	-1.23813	-0.308167	1.23813	down	65363.3	83107.5	99559.9	82925.4	87563.2	95522.1	67025.4	68275.6	74233.8	0	-0.139371	0.0841455	-0.270759	-0.155547	-0.184999	0.112461	0.119313	0.0814219	RPSA	Homo sapiens ribosomal protein SA (RPSA), transcript variant 1, mRNA [NM_002295]	39453479	chr3	39453420	+	FALSE	hs|3p22.1	3921	NM_002295	ribosomal protein SA	chr3:39453420-39453479	GO:0005515|GO:0010467|GO:0000461|GO:0005886|GO:0019058|GO:0005634|GO:0006412|GO:0005829|GO:0006414|GO:0005622|GO:0006407|GO:0005737|GO:0016032|GO:0004872|GO:0007155|GO:0000028|GO:0003735|GO:0019083|GO:0006415|GO:0022627|GO:0031018|GO:0043022|GO:0000447|GO:0044267|GO:0030686	NM_002295	Hs.449909
A_23_P201181	0.00377351	1.61287	0.689632	1.61287	up	-4.10062	-2.03584	4.10062	down	-6.61378	-2.72547	6.61378	down	28.0168	32.6859	29.286	27.9888	20.5878	29.6241	130.768	33.7547	38.9645	0.341015	0	-1.22336	-0.825843	-0.428293	-1.6971	1.61155	1.82271	1.79092	PTPN22	Homo sapiens protein tyrosine phosphatase, non-receptor type 22 (lymphoid) (PTPN22), transcript variant 2, mRNA [NM_012411]	114376990	chr1	114376931	-	FALSE	hs|1p13.2	26191	NM_012411	protein tyrosine phosphatase, non-receptor type 22 (lymphoid)	chr1:114376990-114376931	GO:0005515|GO:0050855|GO:0048471|GO:0017124|GO:0050868|GO:0005634|GO:0050860|GO:0032817|GO:0035335|GO:0005737|GO:0006470|GO:0016787|GO:0030217|GO:0045088|GO:0009898|GO:0019900|GO:0004725|GO:0035644	NM_012411	Hs.535276
A_23_P250413	0.00063409	1.29122	0.368736	1.29122	up	-1.69657	-0.76262	1.69657	down	-2.19065	-1.13136	2.19065	down	47.2559	46.8929	91.4076	69.4412	73.4619	75.3189	72.815	56.2051	54.3868	0.149321	-0.222794	0	-0.470365	-0.506809	-0.202508	0.545446	0.892301	0.77664	PARVG	Homo sapiens parvin, gamma (PARVG), transcript variant 1, mRNA [NM_022141]	44594584	chr22	44594525	+	FALSE	hs|22q13.31	64098	NM_022141	parvin, gamma	chr22:44594525-44594584	GO:0005737|GO:0030054|GO:0007160|GO:0005886|GO:0003779|GO:0007155|GO:0005856|GO:0005925	NM_022141	Hs.658995
A_24_P944964	0.00937482	-1.39414	-0.47938	1.39414	down	-2.05895	-1.04191	2.05895	down	-1.47686	-0.56253	1.47686	down	21.126	11.8609	12.5022	13.2743	7.90626	10.927	263.063	19.3026	25.593	-1.0009	-0.358388	-0.484672	-0.425963	0.0201474	0	0.630351	0.413584	0.237839	GP5	Homo sapiens glycoprotein V (platelet) (GP5), mRNA [NM_004488]	194115704	chr3	194115645	-	FALSE	hs|3q29	2814	NM_004488	glycoprotein V (platelet)	chr3:194115704-194115645	GO:0005886|GO:0007596|GO:0005887|GO:0007597|GO:0030168|GO:0007155	NM_004488	Hs.73734
A_24_P910277	0.00517059	1.53668	0.619819	1.53668	up	-2.26473	-1.17934	2.26473	down	-3.48017	-1.79916	3.48017	down	22.2829	11.5881	15.0174	28.3159	21.1125	6.70511	491.37	21.6326	24.575	0	0.823241	-0.116782	-0.908948	-0.10078	-0.143272	1.55152	1.14509	1.54786							FALSE
A_24_P396340	0.00174865	-1.10372	-0.142378	1.10372	down	-3.00442	-1.58708	3.00442	down	-2.72208	-1.44471	2.72208	down	25.1001	18.6369	25.6358	28.8683	20.3851	19.497	606.33	23.3964	23.721	-0.259958	-0.0200368	0	0.297305	-0.111803	-0.038364	1.32814	1.09929	2.05383	C1orf212	Homo sapiens chromosome 1 open reading frame 212 (C1orf212), transcript variant 3, mRNA [NM_138428]	35320495	chr1	35320436	-	FALSE	hs|1p34.3	113444	NM_138428	chromosome 1 open reading frame 212	chr1:35320495-35320436	GO:0016020|GO:0016021	NM_138428	Hs.27160
A_23_P46356	0.000822488	2.44613	1.2905	2.44613	up	-2.18924	-1.13043	2.18924	down	-5.35518	-2.42093	5.35518	down	24.4735	23.5103	29.2682	25.3223	26.6363	28.9425	102.021	28.2736	34.832	0.104864	-0.0720112	0	-1.24581	-1.962	-0.63084	1.10282	1.11369	1.20764	TNFAIP8L2	Homo sapiens tumor necrosis factor, alpha-induced protein 8-like 2 (TNFAIP8L2), mRNA [NM_024575]	151132032	chr1	151131973	+	FALSE	hs|1q21.3	79626	NM_024575	tumor necrosis factor, alpha-induced protein 8-like 2	chr1:151131973-151132032	GO:0045087	NM_024575	Hs.432360
A_23_P46871	0.00381266	-1.14936	-0.200827	1.14936	down	1.93053	0.949	1.93053	up	2.21887	1.14983	2.21887	up	266.018	312.6	471.569	314.35	424.63	517.659	330.544	150.38	227.197	0.0386101	-0.0162458	0	0.136584	0.202869	0.28539	-0.941663	-1.3922	-0.490771	SLC29A3	Homo sapiens solute carrier family 29 (nucleoside transporters), member 3 (SLC29A3), transcript variant 1, mRNA [NM_018344]	73122681	chr10	73122622	+	FALSE	hs|10q22.1	55315	NM_018344	solute carrier family 29 (nucleoside transporters), member 3	chr10:73122622-73122681	GO:0016020|GO:0005337|GO:0031902|GO:0015858|GO:0055086|GO:0016021|GO:0005765|GO:0055085|GO:0005768	NM_018344	Hs.438419
A_32_P30477	0.00670756	1.65899	0.730309	1.65899	up	-3.05253	-1.61	3.05253	down	-5.06412	-2.34031	5.06412	down	27.0546	31.0591	28.899	26.3248	31.1991	26.5655	169.348	40.7531	43.3485	0.492119	0	-0.96313	-0.550665	-0.469055	-1.64222	1.28589	1.49444	1.57867		zr66a07.r1 Soares_NhHMPu_S1 Homo sapiens cDNA clone IMAGE:668340 5', mRNA sequence [AA234312]	130608539	chr11	130608480	+	FALSE	hs|11q24.3		AA234312		chr11:130608480-130608539			Hs.144387
A_23_P353614	0.000384881	1.04113	0.0581512	1.04113	up	-3.42186	-1.77478	3.42186	down	-3.5626	-1.83293	3.5626	down	37.6042	44.3276	56.4388	56.2077	42.8689	54.0267	193.318	51.1142	51.6755	0.070972	-0.151334	-0.532721	-0.0719615	-0.715575	0	1.64195	1.47849	1.59082	C8orf46	Homo sapiens chromosome 8 open reading frame 46 (C8orf46), mRNA [NM_152765]	67430418	chr8	67430359	+	FALSE	hs|8q13.1	254778	NM_152765	chromosome 8 open reading frame 46	chr8:67430359-67430418		NM_152765	Hs.268869
A_23_P399255	0.00493414	1.19682	0.259212	1.19682	up	1.80063	0.848502	1.80063	up	1.50451	0.58929	1.50451	up	659.541	730.367	1078.93	863.251	791.21	1078.03	784.686	454.68	610.616	0.434234	0.165768	0.373627	0	0.227188	-0.0311956	-0.840759	-0.328331	-0.402786	RNF182	Homo sapiens ring finger protein 182 (RNF182), transcript variant 2, mRNA [NM_152737]	13980056	chr6	13979997	+	FALSE	hs|6p23	221687	NM_152737	ring finger protein 182	chr6:13979997-13980056	GO:0005515|GO:0005737|GO:0004842|GO:0016567|GO:0016020|GO:0016874|GO:0008270|GO:0016021|GO:0046872|GO:0043231	NM_152737	Hs.111164
A_32_P35506	0.00796026	1.16304	0.217902	1.16304	up	-3.26578	-1.70743	3.26578	down	-3.79823	-1.92533	3.79823	down	31.6154	28.1222	30.553	24.0331	30.8977	37.7992	281.672	37.623	42.9019	0	0.186305	-1.12643	-0.594515	-0.0626477	-0.936665	1.80376	1.27662	1.10177		PREDICTED: Homo sapiens hypothetical LOC100128750 (LOC100128750), partial miscRNA [XR_110873]	30240127	chr8	30240068	-	FALSE	hs|8p12		XR_110873		chr8:30240127-30240068		XR_110873
A_24_P213924	0.00439203	-1.08514	-0.117878	1.08514	down	1.43808	0.524147	1.43808	up	1.56052	0.642025	1.56052	up	711.367	718.178	1124.59	1023.54	935.442	1285.72	1183.2	651.66	883.091	-0.230908	0.188274	0.00177094	0.0616369	0	0.251135	-0.489365	-0.486935	-0.637005	KIAA1609	Homo sapiens KIAA1609 (KIAA1609), mRNA [NM_020947]	84511789	chr16	84511730	-	FALSE	hs|16q24.1	57707	NM_020947	KIAA1609	chr16:84511789-84511730	GO:0005515	NM_020947	Hs.288274
A_23_P69154	0.00810283	1.91918	0.940488	1.91918	up	-6.42158	-2.68293	6.42158	down	-12.3242	-3.62342	12.3242	down	30.1712	36.4042	32.2205	30.4856	27.2434	33.8534	202.89	29.5364	68.4523	0.654724	0	-1.48768	-0.808388	-1.27524	-1.57079	2.01361	1.50679	3.69542	FAM198A	Homo sapiens family with sequence similarity 198, member A (FAM198A), mRNA [NM_001129908]	43098195	chr3	43098136	+	FALSE	hs|3p22.1	729085	NM_001129908	family with sequence similarity 198, member A	chr3:43098136-43098195	GO:0005576	NM_001129908	Hs.729533
A_32_P27706	0.00336853	1.19161	0.252915	1.19161	up	2.01456	1.01046	2.01456	up	1.69062	0.757549	1.69062	up	778.874	1070.95	1517.93	1277.07	1270.4	1161.69	716.083	570.191	712.111	0.242784	0.10077	0.215654	0	0.00445747	-0.203996	-1.21631	-0.732821	-0.52305	AGPS	Homo sapiens alkylglycerone phosphate synthase (AGPS), mRNA [NM_003659]	178408449	chr2	178408390	+	FALSE	hs|2q31.2	8540	NM_003659	alkylglycerone phosphate synthase	chr2:178408390-178408449	GO:0006629|GO:0008610|GO:0008762|GO:0005782|GO:0005886|GO:0008611|GO:0050660|GO:0016614|GO:0042221|GO:0043231|GO:0005739|GO:0008609|GO:0044255|GO:0005778|GO:0016740|GO:0005777	NM_003659	Hs.516543
A_24_P376120	0.00818084	2.18124	1.12515	2.18124	up	-3.98854	-1.99586	3.98854	down	-8.69998	-3.12101	8.69998	down	64.5943	42.2157	45.9164	46.4492	38.9519	47.9727	619.018	44.267	58.6882	0.369894	0	-1.75959	-1.21194	-1.52052	-2.03269	2.27576	1.26432	1.05781	MYPN	Homo sapiens myopalladin (MYPN), mRNA [NM_032578]	69918371	chr10	69918312	+	FALSE	hs|10q21.3	84665	NM_032578	myopalladin	chr10:69918312-69918371	GO:0005737|GO:0005634|GO:0003779|GO:0030017	NM_032578	Hs.55205
A_24_P51360	0.00150013	-1.24543	-0.316643	1.24543	down	1.2858	0.362663	1.2858	up	1.60137	0.679306	1.60137	up	2436.75	2241.64	3778.05	4652.11	4007.18	3468.48	3378.03	2393.61	3482.65	-0.212494	0	0.0234755	0.21152	0.397879	0.151511	-0.510691	-0.460521	-0.305796	LARS	Homo sapiens leucyl-tRNA synthetase (LARS), mRNA [NM_020117]	145547811	chr5	145547752	-	FALSE	hs|5q32	51520	NM_020117	leucyl-tRNA synthetase	chr5:145547811-145547752	GO:0005515|GO:0010467|GO:0005737|GO:0000166|GO:0016874|GO:0004823|GO:0006429|GO:0005524|GO:0004812|GO:0006418|GO:0005829	NM_020117	Hs.432674
A_23_P135184	0.00220867	1.02409	0.0343394	1.02409	up	1.50806	0.592694	1.50806	up	1.47259	0.558354	1.47259	up	1024.04	1526.87	2054.01	2325.24	1911.54	1616.92	1520.98	1009.24	1431.3	0	0.164614	0.2394	0.19009	0.125601	-0.0146952	-0.632393	-0.401812	-0.339863	RALGDS	Homo sapiens ral guanine nucleotide dissociation stimulator (RALGDS), transcript variant 2, mRNA [NM_001042368]	135973271	chr9	135973212	-	FALSE	hs|9q34.2	5900	NM_001042368	ral guanine nucleotide dissociation stimulator	chr9:135973271-135973212	GO:0005622|GO:0005085|GO:0051056|GO:0007165|GO:0048011|GO:0005083|GO:0008321|GO:0007264|GO:0007265|GO:0005829	NM_001042368	Hs.106185
A_24_P459522	0.0028322	1.3993	0.484704	1.3993	up	-2.54371	-1.34694	2.54371	down	-3.55941	-1.83164	3.55941	down	50.4117	62.9985	76.4639	54.0686	69.0412	108.763	192.758	45.8267	65.2591	0.598719	-0.0816739	-0.0458889	-0.721546	0	-0.261409	1.97034	1.31684	1.22479		Homo sapiens cDNA FLJ20137 fis, clone COL07137. [AK000144]	84287617	chr9	84287558	-	FALSE	hs|9q21.32		AK000144		chr9:84287617-84287558			Hs.675417
A_24_P213144	0.000444958	1.04348	0.0614051	1.04348	up	1.64534	0.718387	1.64534	up	1.57678	0.656982	1.57678	up	749.427	973.273	1458.17	1209.08	1271.15	1347.61	858.164	616.021	718.09	0.212535	0	0.0910015	0.146025	0.084114	-0.110818	-0.573305	-0.546754	-0.731565			27502476	chr7	27502413	+	FALSE	hs|7p15.2				chr7:027502413-027502476
A_23_P314584	0.00761385	1.05908	0.0828056	1.05908	up	1.46356	0.549482	1.46356	up	1.38192	0.466677	1.38192	up	1136.42	1379.79	2083.46	1759.66	1843.03	2032.65	1489.54	1038.55	1347.86	0.230671	0.316764	-0.011717	0	0.0324506	0.25485	-0.516716	-0.314816	-0.281198	MAPKAPK3	Homo sapiens mitogen-activated protein kinase-activated protein kinase 3 (MAPKAPK3), mRNA [NM_004635]	50686423	chr3	50686364	+	FALSE	hs|3p21.2	7867	NM_004635	mitogen-activated protein kinase-activated protein kinase 3	chr3:50686364-50686423	GO:0048011|GO:0034130|GO:0034142|GO:0034134|GO:0006950|GO:0007265|GO:0005634|GO:0002224|GO:0051403|GO:0005524|GO:0005829|GO:0007165|GO:0000187|GO:0002756|GO:0008063|GO:0005737|GO:0000166|GO:0004674|GO:0045087|GO:0002755|GO:0005654|GO:0034138|GO:0004708	NM_004635	Hs.234521
A_23_P256375	0.00422622	-1.17721	-0.23537	1.17721	down	1.34219	0.424585	1.34219	up	1.58003	0.659955	1.58003	up	823.329	1209.32	1527.06	1497.52	1471.58	1283.23	1051.59	864.907	934.873	-0.0859968	0	0.0984276	0.221488	0.136739	0.360315	-0.478652	-0.59364	-0.189032	STX4	Homo sapiens syntaxin 4 (STX4), mRNA [NM_004604]	31051380	chr16	31051321	+	FALSE	hs|16p11.2	6810	NM_004604	syntaxin 4	chr16:31051321-31051380	GO:0005802|GO:0005515|GO:0048471|GO:0016081|GO:0005886|GO:0042581|GO:0031201|GO:0006886|GO:0005829|GO:0016323|GO:0005737|GO:0016324|GO:0000149|GO:0006836|GO:0016192|GO:0005773|GO:0017137|GO:0009986|GO:0006892|GO:0030507|GO:0030168|GO:0042383|GO:0005484|GO:0006461|GO:0006944|GO:0016020|GO:0007596|GO:0043219|GO:0001950|GO:0016021|GO:0016044	NM_004604	Hs.83734
A_23_P78405	0.00992629	1.3149	0.394952	1.3149	up	-1.99786	-0.998454	1.99786	down	-2.62698	-1.39341	2.62698	down	46.3792	63.1434	109.643	84.5529	90.3158	106.698	232.077	82.2826	90.0007	0	0.205361	-0.209046	-0.62826	-0.0172406	-0.54304	0.396022	1.29385	1.30181	LIPG	Homo sapiens lipase, endothelial (LIPG), mRNA [NM_006033]	47118672	chr18	47118613	+	FALSE	hs|18q21.1	9388	NM_006033	lipase, endothelial	chr18:47118613-47118672	GO:0042632|GO:0005515|GO:0006629|GO:0032376|GO:0004806|GO:0007584|GO:0008283|GO:0043691|GO:0005576|GO:0004620|GO:0004465|GO:0005615|GO:0050746|GO:0016042|GO:0010983|GO:0016787|GO:0034375|GO:0055091|GO:0008970|GO:0008201|GO:0009395	NM_006033	Hs.465102
A_23_P46429	0.00673958	-2.87784	-1.52499	2.87784	down	-1.68575	-0.753389	1.68575	down	1.70716	0.771596	1.70716	up	4301.63	4222	6385.59	5830.17	6845.94	9057.47	5205.32	3968.63	5041.24	-0.17413	-0.887764	-1.25031	0.485915	0.818616	0.958221	-0.243484	0.191447	0	CYR61	Homo sapiens cysteine-rich, angiogenic inducer, 61 (CYR61), mRNA [NM_001554]	86049012	chr1	86048953	+	FALSE	hs|1p22.3	3491	NM_001554	cysteine-rich, angiogenic inducer, 61	chr1:86048953-86049012	GO:0044319|GO:0060710|GO:0060591|GO:0008283|GO:0003181|GO:0010811|GO:0045597|GO:0003281|GO:0002041|GO:0001558|GO:0009653|GO:0030513|GO:0051789|GO:0006935|GO:0030198|GO:0045944|GO:0045860|GO:0060716|GO:0033690|GO:0070372|GO:0008201|GO:0005520|GO:0003278|GO:0043066|GO:2000304|GO:0030335|GO:0060413|GO:0072593|GO:0050840|GO:0010518|GO:0005576|GO:0001649|GO:0043280|GO:0045669|GO:0005178|GO:0061036|GO:…	NM_001554	Hs.8867
A_32_P507580	0.00472991	1.03146	0.0446816	1.03146	up	1.43016	0.516173	1.43016	up	1.38654	0.471492	1.38654	up	528.879	580.442	846.842	717.219	731.416	931.341	804.44	471.241	525.174	0.0478144	0.211273	0.0596503	0	-0.0279686	0.212662	-0.448268	-0.239868	-0.541646		Homo sapiens cDNA clone IMAGE:5264780. [BC035147]	62492631	chr20	62492572	-	FALSE	hs|20q13.33		BC035147		chr20:62492631-62492572
A_24_P367864	0.00406425	-1.03781	-0.0535368	1.03781	down	2.13981	1.09749	2.13981	up	2.22071	1.15102	2.22071	up	75.157	35.4971	82.557	79.0695	74.9202	69.4588	111.491	59.8687	76.0617	0.131297	-0.100504	0.38005	0	0.245542	0.325912	-1.12312	-0.513175	-1.24532	USP36	Homo sapiens ubiquitin specific peptidase 36, mRNA (cDNA clone IMAGE:5756922), complete cds. [BC038983]	76822662	chr17	76822603	-	FALSE	hs|17q25.3	57602	BC038983	ubiquitin specific peptidase 36	chr17:76822662-76822603	GO:0006511|GO:0005730|GO:0008233|GO:0005634|GO:0008234|GO:0004221		Hs.464243
A_23_P88703	0.00982673	-1.1618	-0.216363	1.1618	down	1.23512	0.304647	1.23512	up	1.43496	0.521009	1.43496	up	951.659	1391.41	1901.68	1486.46	1919.37	1897.83	1139.38	1071.1	1012.56	-0.113274	0	0.0884075	0.269882	0.25036	0.10398	-0.536367	-0.189356	-0.213083	TP53BP1	Homo sapiens tumor protein p53 binding protein 1 (TP53BP1), transcript variant 3, mRNA [NM_005657]	43700182	chr15	43699751	-	FALSE	hs|15q15.3	7158	NM_005657	tumor protein p53 binding protein 1	chr15:43700182-43699751	GO:0005515|GO:0001102|GO:0000781|GO:0001104|GO:0005694|GO:0005657|GO:0042162|GO:0005634|GO:0006302|GO:0003684|GO:0005622|GO:0002039|GO:0051091|GO:0005737|GO:0006281|GO:0000724|GO:0045944|GO:0000777|GO:0005654|GO:0045893	NM_005657	Hs.440968
A_24_P918752	0.00515326	-3.0428	-1.6054	3.0428	down	-1.5435	-0.626201	1.5435	down	1.97137	0.979199	1.97137	up	22.8452	19.6115	27.9163	19.8789	36.7532	49.0774	67.2249	26.7688	29.3727	-0.567339	-0.854167	-0.0883208	1.02436	1.51899	0.763026	0.503208	0	-0.134431	CHD7	Homo sapiens cDNA FLJ20361 fis, clone HEP16789. [AK000368]	61737760	chr8	61737701	+	FALSE	hs|8q12.2	55636	AK000368	chromodomain helicase DNA binding protein 7	chr8:61737701-61737760	GO:0060123|GO:0016817|GO:0060041|GO:0007605|GO:0008015|GO:0005634|GO:0007512|GO:0000166|GO:0007628|GO:0060021|GO:0007626|GO:0048806|GO:0040018|GO:0006355|GO:0001568|GO:0042472|GO:0021545|GO:0004386|GO:0007417|GO:0005524|GO:0003677|GO:0001701|GO:0003007|GO:0001501|GO:0050890|GO:0030217|GO:0003682|GO:0060324|GO:0035116|GO:0060173|GO:0030540|GO:0043584|GO:0016568		Hs.20395
A_32_P91180	0.00217203	1.07868	0.109266	1.07868	up	-2.07612	-1.05389	2.07612	down	-2.23947	-1.16316	2.23947	down	21.9394	13.3733	38.5279	31.0676	31.2059	22.0018	188.962	19.752	25.4713	-0.400982	0	-0.234661	0.0264342	-0.284004	-0.705873	0.939045	0.830884	0.756107		Q2TUU2_SCHMA (Q2TUU2) Thyroid hormone receptor alpha (Fragment), partial (3%) [THC2679544]	84541680	chr11	84541621	-	FALSE	hs|11q14.1				chr11:084541680-084541621
A_24_P204386	0.00616857	1.30378	0.382698	1.30378	up	2.50724	1.3261	2.50724	up	1.92306	0.943403	1.92306	up	83.0511	115.978	166.319	161.633	161.636	122.802	165.456	70.5149	81.2791	0.0577999	1.02008	0.235189	0	-0.0958714	0.260845	-0.736715	-0.980758	-0.947761	MTMR9LP	Homo sapiens myotubularin related protein 9-like, pseudogene (MTMR9LP), non-coding RNA [NR_026850]	32705621	chr1	32705562	-	FALSE	hs|1p35.1	339483	NR_026850	myotubularin related protein 9-like, pseudogene	chr1:32705621-32705562		NR_026850	Hs.471067
A_23_P69362	0.00635129	-1.08167	-0.113263	1.08167	down	1.28763	0.364715	1.28763	up	1.39279	0.477978	1.39279	up	740.269	838.823	1183.32	1058.17	1183.03	1330.33	1114.95	676.465	818.06	-0.0595427	0	0.0650741	0.085413	0.0254412	0.234466	-0.408077	-0.500066	-0.180472	CCDC51	Homo sapiens coiled-coil domain containing 51 (CCDC51), mRNA [NM_024661]	48473899	chr3	48473840	-	FALSE	hs|3p21.31	79714	NM_024661	coiled-coil domain containing 51	chr3:48473899-48473840	GO:0005739|GO:0016020|GO:0016021	NM_024661	Hs.187657
A_24_P648880	0.00421164	-1.20851	-0.27323	1.20851	down	1.87252	0.904982	1.87252	up	2.26296	1.17821	2.26296	up	1684.35	1328.89	2249.28	2473.05	2333.3	3038.18	1430.09	1093.89	1686.47	0.17629	0	-0.0451592	0.329118	0.344238	0.277467	-1.35249	-0.77008	-0.461245	MEIS3P1	Homo sapiens Meis homeobox 3 pseudogene 1 (MEIS3P1), non-coding RNA [NR_002211]	20494658	chr17	20494599	+	FALSE	hs|17p11.2	4213	NR_002211	Meis homeobox 3 pseudogene 1	chr17:20494599-20494658	GO:0043565|GO:0003700|GO:0005634	NR_002211	Hs.356135
A_32_P138004	0.00517765	1.10481	0.143792	1.10481	up	1.4088	0.494464	1.4088	up	1.27515	0.350672	1.27515	up	891.867	1229.79	1625.28	1337.71	1284.66	1501.54	1337.49	685.959	916.316	0.226498	0	0.200408	0.0858983	0.0478784	-0.138248	-0.450965	-0.362175	-0.243346	FAM45A	Homo sapiens family with sequence similarity 45, member A (FAM45A), mRNA [NM_207009]	120897021	chr10	120896964	+	FALSE	hs|10q26.11	404636	NM_207009	family with sequence similarity 45, member A	chr10:120896964-120897021		NM_207009	Hs.730780
A_24_P412512	0.00231944	-1.18462	-0.244419	1.18462	down	-1.43827	-0.524335	1.43827	down	-1.21412	-0.279916	1.21412	down	184.293	258.637	378.828	246.933	315.479	372.36	485.235	272.48	309.941	-0.316333	-0.207628	-0.186277	0	0.173148	-0.150129	0.299874	0.262531	0.300363	NIN	Homo sapiens ninein (GSK3B interacting protein) (NIN), transcript variant 6, mRNA [NM_016350]	51204925	chr14	51204866	-	FALSE	hs|14q22.1	51199	NM_016350	ninein (GSK3B interacting protein)	chr14:51204925-51204866	GO:0005515|GO:0051642|GO:0005813|GO:0005737|GO:0000166|GO:0005874|GO:0005509|GO:0005856|GO:0005525	NM_016350	Hs.310429
A_32_P223210	0.00562444	2.42996	1.28093	2.42996	up	-2.93127	-1.55153	2.93127	down	-7.12288	-2.83246	7.12288	down	24.4305	10.4694	20.5137	20.1317	24.3391	12.9128	1080.18	16.2751	24.1349	0	1.31642	-0.349603	-1.26638	-0.146804	-1.4628	1.68326	2.01893	1.91921	C7orf45	Homo sapiens chromosome 7 open reading frame 45 (C7orf45), mRNA [NM_145268]	129856272	chr7	129856213	+	FALSE	hs|7q32.2	136263	NM_145268	chromosome 7 open reading frame 45	chr7:129856213-129856272	GO:0016020|GO:0016021	NM_145268	Hs.351816
A_23_P206707	0.000795417	-2.1942	-1.13369	2.1942	down	1.36391	0.447745	1.36391	up	2.99268	1.58144	2.99268	up	1027.97	1511.6	2275.36	2868.09	2830.45	1827.87	1377	975.737	959.577	0.205421	-0.199089	0	0.880914	1.14232	1.38418	-0.172632	-0.790445	-0.373826	MT1G	Homo sapiens metallothionein 1G (MT1G), mRNA [NM_005950]	56701935	chr16	56701288	-	FALSE	hs|16q13	4495	NM_005950	metallothionein 1G	chr16:56701935-56701288	GO:0005515|GO:0046872	NM_005950	Hs.433391
A_23_P5761	0.00422344	-1.06956	-0.0970207	1.06956	down	1.61162	0.688515	1.61162	up	1.72373	0.785536	1.72373	up	2389.08	2297.13	3539.84	3187.77	2985.65	4290.02	2665.74	1948.08	2284.12	0.0694885	-0.200687	0.127748	0.170835	0.116777	0	-0.90638	-0.400924	-0.761692	NFE2L2	Homo sapiens nuclear factor (erythroid-derived 2)-like 2 (NFE2L2), transcript variant 1, mRNA [NM_006164]	178095336	chr2	178095277	-	FALSE	hs|2q31.2	4780	NM_006164	nuclear factor (erythroid-derived 2)-like 2	chr2:178095336-178095277	GO:0005515|GO:0005813|GO:0006355|GO:0003700|GO:0005886|GO:0006366|GO:0019904|GO:0005634|GO:2000121|GO:0005829|GO:0030968|GO:0045995|GO:0043565|GO:0005737|GO:0030194|GO:0046983|GO:0034599|GO:0045893|GO:2000379|GO:0000785	NM_006164	Hs.155396
A_32_P216820	0.00543472	1.1143	0.156136	1.1143	up	1.67667	0.745602	1.67667	up	1.50469	0.589465	1.50469	up	652.034	772.965	1309.99	1160.49	954.49	924.358	1049.76	401.665	643.666	0	0.0397528	0.347882	0.0102586	0.0735406	-0.164573	-0.717156	-0.765687	-0.366326		full-length cDNA clone CS0DB002YH03 of Neuroblastoma Cot 10-normalized of Homo sapiens (human). [CR601196]	60933806	chr10	60933747	-	FALSE	hs|10q21.1		CR601196		chr10:60933806-60933747			Hs.592518
A_23_P58676	0.00249404	-3.82102	-1.93396	3.82102	down	-1.31922	-0.399687	1.31922	down	2.89642	1.53427	2.89642	up	194.36	178.93	244.664	499.144	459.476	696.532	454.565	182.559	362.938	-0.746189	0	-0.32155	1.20136	1.70311	1.82967	-0.335065	-0.130726	0.597114	NPR3	Homo sapiens natriuretic peptide receptor C/guanylate cyclase C (atrionatriuretic peptide receptor C) (NPR3), transcript variant 1, mRNA [NM_001204375]	32791776	chr5	32791717	+	FALSE	hs|5p13.3	4883	NM_001204375	natriuretic peptide receptor C/guanylate cyclase C (atrionatriuretic peptide receptor C)	chr5:32791717-32791776	GO:0033688|GO:0042562|GO:0005624|GO:0007200|GO:0007193|GO:0042803|GO:0001501|GO:0016941|GO:0016020|GO:0008217|GO:0004872|GO:0002158|GO:0016021|GO:0017046|GO:0035810	NM_001204375	Hs.13528
A_23_P65555	0.00411716	-1.07905	-0.109763	1.07905	down	1.58657	0.665908	1.58657	up	1.71199	0.775672	1.71199	up	119.652	167.39	226.199	157.477	208.456	203.448	192.404	126.113	125.565	-0.0956808	0.0448436	0.304331	0	0.181377	0.401407	-0.566834	-0.450353	-0.727045	SAV1	Homo sapiens salvador homolog 1 (Drosophila) (SAV1), mRNA [NM_021818]	51111569	chr14	51111510	-	FALSE	hs|14q22.1	60485	NM_021818	salvador homolog 1 (Drosophila)	chr14:51111569-51111510	GO:0005515|GO:0043065|GO:0050680|GO:0005634|GO:0035329|GO:2000036|GO:0042802|GO:0060575|GO:0007165|GO:0005737|GO:0030216|GO:0060487|GO:0001942	NM_021818	Hs.642842
A_32_P50846	0.00634359	1.79133	0.841029	1.79133	up	-2.38798	-1.25579	2.38798	down	-4.27766	-2.09682	4.27766	down	43.1539	65.5992	70.3835	49.0392	47.7809	71.4991	69.1348	55.8747	62.6435	0.449059	-0.170964	0	-0.157817	-1.41555	-0.671629	0.764024	1.65569	1.62575			45645516	chrX	45645457	-	FALSE	hs|Xp11.3				chrX:045645516-045645457
A_24_P355876	0.0063811	-1.05427	-0.0762453	1.05427	down	1.37786	0.462428	1.37786	up	1.45264	0.538673	1.45264	up	13238	13522.7	20059.4	21538.9	18194.2	22077.2	15002.7	11658.7	14715.3	-0.00662434	0	0.150644	0.0103301	0.0272626	0.335163	-0.555057	-0.387323	-0.300884	TMBIM6	Homo sapiens transmembrane BAX inhibitor motif containing 6 (TMBIM6), transcript variant 1, mRNA [NM_003217]	50158477	chr12	50158418	+	FALSE	hs|12q13.12	7009	NM_003217	transmembrane BAX inhibitor motif containing 6	chr12:50158418-50158477	GO:0043066|GO:0016020|GO:0005887|GO:0005783|GO:0005634|GO:0005626	NM_003217	Hs.730613
A_23_P94517	0.00514522	1.05472	0.0768573	1.05472	up	1.65261	0.724745	1.65261	up	1.56687	0.647887	1.56687	up	167.474	122.296	172.524	155.674	163.664	234.703	220.716	100.424	131.946	0.36148	0	-0.0749303	0.0148452	0.0130944	0.0280379	-0.75408	-0.385155	-0.748449	DBC1	Homo sapiens deleted in bladder cancer 1 (DBC1), mRNA [NM_014618]	121929219	chr9	121929160	-	FALSE	hs|9q33.1	1620	NM_014618	deleted in bladder cancer 1	chr9:121929219-121929160	GO:0005515|GO:0008219|GO:0005737|GO:0007050|GO:0045786	NM_014618	Hs.532316
A_24_P99526	0.00295808	1.71698	0.779876	1.71698	up	-2.68522	-1.42504	2.68522	down	-4.61048	-2.20492	4.61048	down	20.4309	15.6446	24.3517	18.1064	12.7992	13.1938	442.042	29.3889	32.9067	0	0.529126	-0.352431	-1.03405	-0.991286	-0.137597	1.00332	1.67183	1.77667	TTYH2	Homo sapiens tweety homolog 2 (Drosophila) (TTYH2), transcript variant 1, mRNA [NM_032646]	72249259	chr17	72248496	+	FALSE	hs|17q25.1	94015	NM_032646	tweety homolog 2 (Drosophila)	chr17:72248496-72249259	GO:0005515|GO:0005886|GO:0034707|GO:0016021|GO:0005254|GO:0005216|GO:0006811	NM_032646	Hs.27935
A_23_P107911	0.00179058	-3.92513	-1.97274	3.92513	down	-1.68234	-0.750471	1.68234	down	2.33314	1.22227	2.33314	up	60.3687	74.9894	88.9174	132.654	143.368	192.448	151.251	73.7017	74.6424	-1.32743	-0.115324	-0.80802	1.24605	1.22297	1.19843	0.202164	-0.201526	0	KLK10	Homo sapiens kallikrein-related peptidase 10 (KLK10), transcript variant 1, mRNA [NM_002776]	51517655	chr19	51517596	-	FALSE	hs|19q13.41	5655	NM_002776	kallikrein-related peptidase 10	chr19:51517655-51517596	GO:0007049|GO:0004252|GO:0006508|GO:0008236|GO:0008233|GO:0005576	NM_002776	Hs.275464
A_23_P259611	0.00223686	-1.18315	-0.24263	1.18315	down	-2.53422	-1.34154	2.53422	down	-2.14193	-1.09891	2.14193	down	27.6223	28.0241	39.5388	39.6021	33.5781	36.3828	295.729	36.089	39.179	-0.56501	-0.587279	-0.0426388	0.0991546	-0.566192	0	0.901004	0.890297	1.03839	TXNDC3	Homo sapiens thioredoxin domain containing 3 (spermatozoa) (TXNDC3), mRNA [NM_016616]	37939940	chr7	37939881	+	FALSE	hs|7p14.1	51314	NM_016616	thioredoxin domain containing 3 (spermatozoa)	chr7:37939881-37939940	GO:0006241|GO:0006228|GO:0006183|GO:0005737|GO:0015630|GO:0004550|GO:0045454|GO:0007275|GO:0007283|GO:0005524|GO:0030154	NM_016616	Hs.723454
A_23_P351204	0.00214659	-1.02911	-0.0413917	1.02911	down	1.28487	0.361621	1.28487	up	1.32227	0.403013	1.32227	up	2301.84	1765.84	2732.74	2246.99	2127.41	2863.22	2292.76	1843.31	2785.83	-0.00174999	0.159776	0	0.119041	0.0559921	0.107167	-0.399054	-0.186289	-0.341495	KCNQ2	Homo sapiens potassium voltage-gated channel, KQT-like subfamily, member 2 (KCNQ2), transcript variant 5, mRNA [NM_172109]	62065137	chr20	62065078	-	FALSE	hs|20q13.33	3785	NM_172109	potassium voltage-gated channel, KQT-like subfamily, member 2	chr20:62065137-62065078	GO:0005244|GO:0005267|GO:0007268|GO:0055085|GO:0007399|GO:0016020|GO:0007411|GO:0005249|GO:0008076|GO:0016021|GO:0006813|GO:0071805|GO:0006811	NM_172109	Hs.161851
A_23_P57155	0.00879404	1.24598	0.317287	1.24598	up	2.76932	1.46953	2.76932	up	2.22259	1.15224	2.22259	up	95.2616	2243.17	3659.49	1636.84	2734.78	3494.73	3704.87	3095.73	3132.6	0.749663	0.0679965	0.0179114	0	0.240219	-0.356507	-1.70627	-1.03447	-0.832287	CHGB	Homo sapiens chromogranin B (secretogranin 1) (CHGB), mRNA [NM_001819]	5904366	chr20	5904307	+	FALSE	hs|20p12.3	1114	NM_001819	chromogranin B (secretogranin 1)	chr20:5904307-5904366	GO:0005179|GO:0005576|GO:0030141	NM_001819	Hs.516874
A_24_P794122	9.40166e-06	-1.01097	-0.0157357	1.01097	down	2.78673	1.47858	2.78673	up	2.8173	1.49431	2.8173	up	167.827	240.805	330.445	349.243	329.441	317.299	259.323	154.245	169.49	-0.13108	0.207001	0.121258	0.0164479	0	0.227938	-1.38831	-1.43715	-1.41309		oy48g05.x1 NCI_CGAP_Brn23 Homo sapiens cDNA clone IMAGE:1669112 3', mRNA sequence [AI056399]	143744230	chr1	143744171	-	FALSE	hs|1q21.1		AI056399		chr1:143744230-143744171			Hs.634469
A_24_P913961	0.00187839	1.03749	0.0530924	1.03749	up	1.38698	0.471949	1.38698	up	1.33687	0.418856	1.33687	up	12221.9	13893.5	20202.3	20848.8	17757.2	19496.1	12049.8	9836.03	12868.6	0.129593	0.00899988	0.119326	0.180525	0	-0.0818835	-0.458305	-0.392253	-0.307369							FALSE
A_24_P524562	5.07373e-05	1.16131	0.215755	1.16131	up	2.23719	1.16169	2.23719	up	1.92643	0.945932	1.92643	up	738.489	783.167	2556.45	2388.21	2024.29	2354.57	1170.79	401.651	657.005	0.0956279	0.145626	0.214105	0.0460243	0	-0.237931	-1.00928	-0.878795	-1.14162							FALSE
A_32_P117464	0.00986564	-1.07676	-0.106695	1.07676	down	1.68254	0.750639	1.68254	up	1.81169	0.857334	1.81169	up	230.491	206.304	437.618	290.515	325.281	406.577	219.626	152.177	215.163	-0.0110735	0	0.356577	0.136492	0.497307	0.0317883	-0.952559	-0.4821	-0.471754	MB21D2	Homo sapiens Mab-21 domain containing 2 (MB21D2), mRNA [NM_178496]	192515209	chr3	192515150	-	FALSE	hs|3q29	151963	NM_178496	Mab-21 domain containing 2	chr3:192515209-192515150		NM_178496	Hs.151443
A_32_P209778	0.00652824	1.28509	0.361871	1.28509	up	2.03629	1.02594	2.03629	up	1.58455	0.664071	1.58455	up	463.809	436.879	631.069	939.2	608.799	688.44	883.947	300.734	473.002	0.221053	0.763492	0.416236	0	-0.0942239	0.409392	-0.713936	-0.334835	-0.628274		zl48e07.s1 Soares_pregnant_uterus_NbHPU Homo sapiens cDNA clone IMAGE:505188 3', mRNA sequence [AA151106]	56653098	chr18	56653039	-	FALSE	hs|18q21.32		AA151106		chr18:056653098-056653039			Hs.469639
A_24_P229426	0.00365413	1.73725	0.796809	1.73725	up	-3.19559	-1.67608	3.19559	down	-5.55155	-2.47289	5.55155	down	19.572	18.9031	13.4486	30.782	14.4581	10.4867	156.739	22.3634	28.3233	0	0.0111531	-1.22387	-1.67429	-1.2062	-0.722643	0.862728	1.5964	1.35641	GLYATL1P4	PREDICTED: Homo sapiens glycine-N-acyltransferase-like 1 pseudogene 4, transcript variant 1 (GLYATL1P4), partial mRNA [XM_002343101]	58818318	chr11	58818259	+	FALSE	hs|11q12.1	643637	XM_002343101	glycine-N-acyltransferase-like 1 pseudogene 4	chr11:58818259-58818318		XM_002343101	Hs.729787
A_23_P55256	0.000215972	-1.82956	-0.871494	1.82956	down	1.26331	0.337212	1.26331	up	2.3113	1.20871	2.3113	up	844.969	879.722	1463.11	1550.77	1616.87	2532.68	1132.55	764.579	1050.85	0	-0.0654078	0.16838	0.797287	0.905775	1.01439	-0.483804	-0.366094	-0.0587663	ZNF652	Homo sapiens zinc finger protein 652 (ZNF652), transcript variant 2, mRNA [NM_014897]	47372664	chr17	47372605	-	FALSE	hs|17q21.32	22834	NM_014897	zinc finger protein 652	chr17:47372664-47372605	GO:0005622|GO:0005515|GO:0006355|GO:0008270|GO:0005634|GO:0003677|GO:0046872	NM_014897	Hs.463375
A_23_P109682	0.00640272	1.03041	0.0432135	1.03041	up	1.8118	0.857426	1.8118	up	1.75834	0.814213	1.75834	up	2434.16	2312.21	3738.48	3929.38	2983.32	3758.24	2641.03	1790.6	2523.73	-0.159582	0.067769	0.263744	0.0277739	0	0.0145169	-1.14229	-0.465529	-0.792523	AZI2	Homo sapiens 5-azacytidine induced 2 (AZI2), transcript variant 1, mRNA [NM_022461]	28365132	chr3	28365073	-	FALSE	hs|3p24.1	64343	NM_022461	5-azacytidine induced 2	chr3:28365132-28365073	GO:0005739|GO:0005737|GO:0005886|GO:0007249	NM_022461	Hs.706676
A_23_P65157	0.00931615	1.16533	0.220743	1.16533	up	1.23521	0.304759	1.23521	up	1.05996	0.0840165	1.05996	up	5227.5	6185.23	7919.99	8595.04	7218.23	6313.67	6627.24	4594.8	6328.76	0.216199	0.152715	0.196499	-0.0125102	0.0388041	-0.123109	0	-0.21643	-0.132435	COX17	Homo sapiens COX17 cytochrome c oxidase assembly homolog (S. cerevisiae) (COX17), nuclear gene encoding mitochondrial protein, mRNA [NM_005694]	119396074	chr3	119394045	-	FALSE	hs|3q13.33	10063	NM_005694	COX17 cytochrome c oxidase assembly homolog (S. cerevisiae)	chr3:119396074-119394045	GO:0007507|GO:0005739|GO:0005758|GO:0005737|GO:0007420|GO:0005507|GO:0016531|GO:0006091|GO:0046872|GO:0006825	NM_005694	Hs.534383
A_24_P37441	0.000782239	1.73122	0.791791	1.73122	up	1.61603	0.692457	1.61603	up	-1.07128	-0.0993341	1.07128	down	1522.91	1809.41	2538.04	1662.8	1667.62	2093.4	1591.51	1102.75	1460.18	0.806391	0.455662	0.709575	-0.00121701	-0.155464	-0.247064	-0.139293	0	0.0335503	PDK1	Homo sapiens pyruvate dehydrogenase kinase, isozyme 1 (PDK1), nuclear gene encoding mitochondrial protein, mRNA [NM_002610]	173463332	chr2	173463273	+	FALSE	hs|2q31.1	5163	NM_002610	pyruvate dehydrogenase kinase, isozyme 1	chr2:173463273-173463332	GO:0004740|GO:0010510|GO:0046982|GO:0005975|GO:0007264|GO:0032403|GO:0000155|GO:0005524|GO:0042803|GO:0005739|GO:0004672|GO:0000166|GO:0006090|GO:0005759|GO:0018106|GO:0006006|GO:0006468|GO:0045254|GO:0016740|GO:0007166	NM_002610	Hs.470633
A_23_P501007	0.00366674	-8.66828	-3.11575	8.66828	down	-1.56538	-0.646511	1.56538	down	5.5375	2.46923	5.5375	up	219.367	270.319	350.589	510.309	528.104	760.771	478.319	236.831	352.846	-1.7788	-0.73567	-0.324256	1.8858	2.30618	2.31653	0	-1.3378	0.438607	EFEMP1	Homo sapiens EGF containing fibulin-like extracellular matrix protein 1 (EFEMP1), transcript variant 2, mRNA [NM_001039348]	56093847	chr2	56093788	-	FALSE	hs|2p16.1	2202	NM_001039348	EGF containing fibulin-like extracellular matrix protein 1	chr2:56093847-56093788	GO:0005515|GO:0005154|GO:0006355|GO:0005509|GO:0005578|GO:0005576|GO:0018108|GO:0005615|GO:0005006|GO:0031012|GO:0007173|GO:0032331|GO:0007601|GO:0008083	NM_001039348	Hs.76224
A_23_P11201	0.00502202	1.657	0.728572	1.657	up	-3.00044	-1.58517	3.00044	down	-4.97172	-2.31375	4.97172	down	17.1645	13.0799	14.9003	18.5846	9.61704	7.62327	225.66	13.9348	18.9068	0.162213	0	-0.833497	-0.912582	-1.25867	-0.685744	0.546015	1.7536	1.78462	GPR34	Homo sapiens G protein-coupled receptor 34 (GPR34), transcript variant 4, mRNA [NM_001097579]	41555996	chrX	41555937	+	FALSE	hs|Xp11.4	2857	NM_001097579	G protein-coupled receptor 34	chrX:41555937-41555996	GO:0005886|GO:0004930|GO:0005624|GO:0005625|GO:0008022|GO:0030165|GO:0032403|GO:0006886|GO:0030425|GO:0043234|GO:0005737|GO:0007186|GO:0045028|GO:0005887|GO:0004872|GO:0016021	NM_001097579	Hs.495989
A_23_P41553	0.00527007	-1.37205	-0.456331	1.37205	down	1.09408	0.129712	1.09408	up	1.50112	0.586044	1.50112	up	15746	9546.01	23069.1	23804.6	24683.4	26018.6	18203.1	16503.6	19534.7	-0.193296	0.16065	0	0.349395	0.618433	0.368519	-0.0829696	-0.228193	-0.110621		Homo sapiens ncaml mRNA, complete cds. [AF241539]	69625586	chr4	69625527	-	FALSE	hs|4q13.2		AF241539		chr4:69625586-69625527			Hs.543586
A_23_P62276	0.00100702	1.12842	0.174309	1.12842	up	1.33456	0.416361	1.33456	up	1.18267	0.242052	1.18267	up	790.431	945.899	1350.54	944.194	1025.3	1388.88	996.614	701.2	785.709	0.0933503	0.172971	0.104987	0.0248433	0	-0.176463	-0.29596	-0.317496	-0.264319	NKAP	Homo sapiens NFKB activating protein (NKAP), mRNA [NM_024528]	119065970	chrX	119065911	-	FALSE	hs|Xq24	79576	NM_024528	NFKB activating protein	chrX:119065970-119065911	GO:0046638|GO:0005515|GO:0005737|GO:0007219|GO:0003682|GO:0005730|GO:0005634|GO:0045892	NM_024528	Hs.522771
A_23_P25868	0.00872111	-1.0087	-0.0124913	1.0087	down	1.74702	0.804895	1.74702	up	1.76221	0.817386	1.76221	up	347.611	497.199	767.7	616.467	625.609	709.254	369.658	266.357	322.814	0	0.00945276	0.268053	0.169903	0.147604	-0.00252721	-1.13182	-0.42086	-0.584502	NAA30	Homo sapiens N(alpha)-acetyltransferase 30, NatC catalytic subunit (NAA30), mRNA [NM_001011713]	57879101	chr14	57879042	+	FALSE	hs|14q22.3	122830	NM_001011713	N(alpha)-acetyltransferase 30, NatC catalytic subunit	chr14:57879042-57879101	GO:0005737|GO:0008080|GO:0004596|GO:0008152|GO:0016740|GO:0008415	NM_001011713	Hs.165465
A_32_P6032	0.00899872	1.4392	0.525264	1.4392	up	3.1665	1.66289	3.1665	up	2.20019	1.13763	2.20019	up	163.173	82.1278	115.478	185.288	125.518	134.751	190.435	75.9348	113.68	0.798543	1.03349	0.33356	0	-0.195995	0.785795	-1.38393	-0.5605	-0.878653		we79f04.x1 Soares_NFL_T_GBC_S1 Homo sapiens cDNA clone IMAGE:2347327 3', mRNA sequence [AI873070]	54876116	chr4	54876057	+	FALSE	hs|4q12		AI873070		chr4:54876057-54876116			Hs.712904
A_23_P121914	0.00349007	1.65201	0.724221	1.65201	up	-1.97217	-0.979781	1.97217	down	-3.25803	-1.704	3.25803	down	24.6153	16.5843	28.7525	48.952	28.7926	11.3215	401.84	30.5144	37.6014	-0.762838	0	0.00461993	-0.482221	-1.13987	-1.30879	0.667219	0.818304	0.6956	CYP2B7P1	Homo sapiens cDNA, FLJ97881. [AK307933]	41445127	chr19	41445068	+	FALSE	hs|19q13.2	1556	AK307933	cytochrome P450, family 2, subfamily B, polypeptide 7 pseudogene 1	chr19:41445068-41445127	GO:0004497|GO:0016712|GO:0009055|GO:0005575|GO:0046872|GO:0055114|GO:0020037		Hs.529117
A_24_P307964	0.00898159	-2.736	-1.45207	2.736	down	1.2681	0.342666	1.2681	up	3.46951	1.79473	3.46951	up	40.6043	49.2145	71.4413	126.721	128.995	125.874	245.336	31.7513	38.9197	-1.26194	0	0.183623	0.814855	1.06443	1.3986	-0.595038	-0.724194	-0.787079	SOHLH1	Homo sapiens spermatogenesis and oogenesis specific basic helix-loop-helix 1 (SOHLH1), transcript variant 2, mRNA [NM_001012415]	138585325	chr9	138585266	-	FALSE	hs|9q34.3	402381	NM_001012415	spermatogenesis and oogenesis specific basic helix-loop-helix 1	chr9:138585325-138585266	GO:0006355|GO:0005737|GO:0048477|GO:0007275|GO:0005634|GO:0007283|GO:0003677|GO:0030154	NM_001012415	Hs.120464
A_23_P153524	0.00389054	-1.02754	-0.0391894	1.02754	down	1.99875	0.999097	1.99875	up	2.05379	1.03829	2.05379	up	98.2891	138.365	208.269	166.299	185.547	165.206	137.074	80.1652	113.808	-0.0667458	0	0.559571	0.0890101	0.357791	0.163591	-1.03927	-0.890641	-0.574553	C19orf73	Homo sapiens chromosome 19 open reading frame 73 (C19orf73), mRNA [NM_018111]	49621866	chr19	49621807	-	FALSE	hs|19q13.33	55150	NM_018111	chromosome 19 open reading frame 73	chr19:49621866-49621807		NM_018111	Hs.458310
A_23_P256342	0.0056691	-1.08804	-0.121731	1.08804	down	1.60718	0.684535	1.60718	up	1.74868	0.806266	1.74868	up	674.57	662.293	1128.81	1097.91	933.722	1256.09	958.109	532.416	684.918	0	-0.255065	0.278693	0.209045	0.176317	0.00345814	-0.906175	-0.56137	-0.562431	SNX13	Homo sapiens sorting nexin 13 (SNX13), mRNA [NM_015132]	17833194	chr7	17833135	-	FALSE	hs|7p21.1	23161	NM_015132	sorting nexin 13	chr7:17833194-17833135	GO:0043547|GO:0005622|GO:0007154|GO:0016020|GO:0031901|GO:0009968|GO:0004871|GO:0035091|GO:0006886|GO:0005769|GO:0008289	NM_015132	Hs.487648
A_32_P41396	0.00847088	2.41419	1.27154	2.41419	up	-2.44996	-1.29276	2.44996	down	-5.91469	-2.5643	5.91469	down	42.7227	25.4406	34.3938	48.1514	32.5245	35.9333	175.447	38.4913	51.9291	0	0.597931	-1.52629	-1.47044	-1.44653	-1.82602	1.13647	0.896376	0.91708			137714026	chrX	137713967	+	FALSE	hs|Xq26.3				chrX:137713967-137714026
A_23_P171336	0.00135896	-1.05008	-0.0704935	1.05008	down	1.95306	0.965734	1.95306	up	2.05086	1.03623	2.05086	up	136.68	175.655	292.459	283.194	279.62	214.09	171.951	112.169	108.681	0.0552849	-0.0688291	0.243945	0	0.231214	0.210667	-0.840479	-0.626231	-1.20009	NXF3	Homo sapiens nuclear RNA export factor 3 (NXF3), mRNA [NM_022052]	102330853	chrX	102330794	-	FALSE	hs|Xq22.1	56000	NM_022052	nuclear RNA export factor 3	chrX:102330853-102330794	GO:0005622|GO:0005515|GO:0005737|GO:0006406|GO:0005487|GO:0000166|GO:0016973|GO:0006810|GO:0042272|GO:0005634|GO:0003729	NM_022052	Hs.60386
A_24_P195327	0.00333077	-1.12605	-0.171276	1.12605	down	2.49285	1.3178	2.49285	up	2.80709	1.48908	2.80709	up	221.573	376.28	482.32	464.833	414.802	301.223	281.901	194.6	186.819	0	-0.257348	0.552046	0.370193	0.414639	0.0236942	-1.06674	-0.956415	-1.63555			137865188	chr6	137865129	-	FALSE	hs|6q23.3				chr6:137865188-137865129
A_23_P391264	0.00395893	-1.16126	-0.215697	1.16126	down	1.15601	0.209157	1.15601	up	1.34244	0.424854	1.34244	up	599.594	714.047	996.072	875.84	947.017	1073.1	962.061	638.305	791.422	-0.0342387	0.109681	0	0.142827	0.232645	0.347062	-0.132011	-0.295352	-0.124665	BTN3A2	Homo sapiens butyrophilin, subfamily 3, member A2 (BTN3A2), transcript variant 1, mRNA [NM_007047]	26375009	chr6	26373640	+	FALSE	hs|6p22.2	11118	NM_007047	butyrophilin, subfamily 3, member A2	chr6:26373640-26375009	GO:0008150|GO:0016020|GO:0016021	NM_007047	Hs.376046
A_24_P101617	0.00149808	1.11143	0.152416	1.11143	up	1.87265	0.905085	1.87265	up	1.68491	0.752668	1.68491	up	588.319	1045.65	1711.65	1077.8	1444.61	1538.13	786.293	641.677	793.29	0.0221206	0.42091	0.208429	-0.074583	0	0.268794	-0.828719	-0.55655	-0.678525			138386735	chr7	138386676	+	FALSE	hs|7q34				chr7:138386676-138386735
A_32_P6653	0.00594	1.02577	0.0367138	1.02577	up	4.05417	2.01941	4.05417	up	3.9523	1.98269	3.9523	up	108.695	105.639	168.821	110.209	106.064	190.354	92.603	37.452	89.1453	0.145191	0	0.556537	-0.122728	0.571571	0.142743	-2.15136	-2.36369	-0.841439	LOC100507265	PREDICTED: Homo sapiens hypothetical LOC100507265 (LOC100507265), partial miscRNA [XR_108421]	204102281	chr2	204102222	-	FALSE	hs|2q33.2	100507265	XR_108421	hypothetical LOC100507265	chr2:204102281-204102222		XR_108421
A_24_P267748	0.00484805	1.0834	0.115568	1.0834	up	1.84173	0.881059	1.84173	up	1.69995	0.765491	1.69995	up	459.171	631.693	1112.39	1236.18	1070.21	729.238	688.269	312.83	390.043	0	0.468848	0.199501	-0.0638552	0.143508	0.241991	-0.599191	-0.928175	-0.447463	NDOR1	Homo sapiens NADPH dependent diflavin oxidoreductase 1 (NDOR1), transcript variant 2, mRNA [NM_014434]	140110560	chr9	140110425	+	FALSE	hs|9q34.3	27158	NM_014434	NADPH dependent diflavin oxidoreductase 1	chr9:140110425-140110560	GO:0005515|GO:0050661|GO:0008219|GO:0048471|GO:0005506|GO:0010181|GO:0050660|GO:0005634|GO:0005829|GO:0005737|GO:0016491|GO:0045111|GO:0055114	NM_014434	Hs.512564
A_23_P136683	0.00833314	1.60937	0.686496	1.60937	up	-1.621	-0.696887	1.621	down	-2.60879	-1.38338	2.60879	down	40.2502	40.8718	60.0893	38.8119	53.5889	62.3155	54.3025	41.6655	47.412	0.302441	-0.186095	0	-0.8406	-1.01097	-0.0915672	0.694897	0.503619	1.00849	HLA-DQB1	Homo sapiens major histocompatibility complex, class II, DQ beta 1 (HLA-DQB1), mRNA [NM_002123]	32628010	chr6	32627951	-	FALSE	hs|6p21.32	3119	NM_002123	major histocompatibility complex, class II, DQ beta 1	chr6:32628010-32627951	GO:0050852|GO:0005794|GO:0005886|GO:0005783|GO:0002504|GO:0019221|GO:0031295|GO:0042613|GO:0005765|GO:0006955|GO:0016020|GO:0005789|GO:0016021|GO:0032395|GO:0010008|GO:0060333|GO:0005768	NM_002123	Hs.409934
A_23_P91487	0.0093015	1.01712	0.0244862	1.01712	up	1.75104	0.808214	1.75104	up	1.72157	0.783728	1.72157	up	360.673	338.109	484.019	419.007	499.072	571.117	437.951	251.551	310.754	0.446248	-0.150928	0.196135	0.116063	0.301932	0	-0.914135	-0.475714	-0.54334	RWDD2B	Homo sapiens RWD domain containing 2B (RWDD2B), mRNA [NM_016940]	30378793	chr21	30378734	-	FALSE	hs|21q21.3	10069	NM_016940	RWD domain containing 2B	chr21:30378793-30378734	GO:0008150|GO:0003674|GO:0005575	NM_016940	Hs.34136
A_24_P34545	0.00034177	-1.48954	-0.574866	1.48954	down	1.35308	0.436247	1.35308	up	2.01546	1.01111	2.01546	up	134.758	154.784	292.068	350.342	322.056	225.297	293.882	146.841	189.917	-0.135635	0	0.205205	0.638001	0.557212	0.598954	-0.59975	-0.347651	-0.29177	ING5	Homo sapiens inhibitor of growth family, member 5 (ING5), mRNA [NM_032329]	242650877	chr2	242650818	+	FALSE	hs|2q37.3	84289	NM_032329	inhibitor of growth family, member 5	chr2:242650818-242650877	GO:0006260|GO:0005515|GO:0070776|GO:0008285|GO:0043966|GO:0008270|GO:0005634|GO:0045893|GO:0046872|GO:0045926|GO:0006473|GO:0016568	NM_032329	Hs.529172
A_23_P21747	0.00237077	-1.08415	-0.11656	1.08415	down	2.20001	1.13751	2.20001	up	2.38514	1.25407	2.38514	up	102.237	169.867	397.314	332.966	359.679	225.534	168.918	68.0478	57.6126	-0.0620746	0	0.361199	0.0317355	0.356997	0.260072	-0.621859	-1.35384	-1.13771	CABP5	Homo sapiens calcium binding protein 5 (CABP5), mRNA [NM_019855]	48533434	chr19	48533375	-	FALSE	hs|19q13.33	56344	NM_019855	calcium binding protein 5	chr19:48533434-48533375	GO:0007165|GO:0005737|GO:0005509|GO:0005575	NM_019855	Hs.117694
A_23_P394259	0.00866598	1.02199	0.0313794	1.02199	up	1.87914	0.910072	1.87914	up	1.83871	0.878692	1.83871	up	88.687	153.511	195.283	138.868	171.733	170.854	242.037	61.4192	64.4699	-0.312716	0.392691	0.230049	0.0572772	0	0.158609	-0.524121	-1.01266	-0.88341	MPP2	Homo sapiens membrane protein, palmitoylated 2 (MAGUK p55 subfamily member 2) (MPP2), mRNA [NM_005374]	41953268	chr17	41953209	-	FALSE	hs|17q21.31	4355	NM_005374	membrane protein, palmitoylated 2 (MAGUK p55 subfamily member 2)	chr17:41953268-41953209	GO:0007165|GO:0009986|GO:0005887|GO:0005624|GO:0004385	NM_005374	Hs.514208
A_23_P137504	0.00562093	-2.24422	-1.16621	2.24422	down	-1.06046	-0.0846852	1.06046	down	2.11628	1.08153	2.11628	up	31.2333	33.2058	49.0958	55.7398	71.349	49.4528	113.994	36.1538	36.1188	-0.68693	0	-0.19612	0.656849	1.00721	0.951532	0.172065	-0.466605	-0.334455	ZBTB37	Homo sapiens zinc finger and BTB domain containing 37 (ZBTB37), transcript variant 2, mRNA [NM_032522]	173840248	chr1	173840189	+	FALSE	hs|1q25.1	84614	NM_032522	zinc finger and BTB domain containing 37	chr1:173840189-173840248	GO:0005622|GO:0006355|GO:0008270|GO:0005634|GO:0003677|GO:0046872	NM_032522	Hs.668497
A_23_P71188	0.00336476	-2.5154	-1.33079	2.5154	down	-1.2686	-0.343241	1.2686	down	1.98281	0.987546	1.98281	up	258.465	230.341	466.2	395.9	520.302	880.761	599.432	317.672	397.646	-0.462162	-0.860124	0.053906	0.696623	1.0652	0.962153	-0.0809206	0	-0.157736		ALU1_HUMAN (P39188) Alu subfamily J sequence contamination warning entry, partial (9%) [THC2648739]	139052938	chr7	139052879	+	FALSE	hs|7q34				chr7:139052879-139052938
A_24_P941947	0.0048057	1.18429	0.24402	1.18429	up	-2.22833	-1.15596	2.22833	down	-2.63899	-1.39998	2.63899	down	37.4246	34.1075	37.8702	46.7609	46.428	35.5438	245.866	34.6247	35.5112	0.159403	-0.343691	-0.193841	0	-0.560224	-0.549965	1.22628	0.554578	1.30891	LPCAT1	lysophosphatidylcholine acyltransferase 1 [Source:HGNC Symbol;Acc:25718] [ENST00000475622]	1456763	chr5	1456704	-	FALSE	hs|5p15.33	79888	AK090444	lysophosphatidylcholine acyltransferase 1	chr5:1456763-1456704	GO:0005794|GO:0047184|GO:0060041|GO:0005783|GO:0005509|GO:0008654|GO:0047192|GO:0000139|GO:0016020|GO:0008152|GO:0005789|GO:0016021|GO:0016740|GO:0008415		Hs.368853
A_32_P151875	0.00932666	-1.13791	-0.186384	1.13791	down	1.36495	0.448846	1.36495	up	1.55319	0.63523	1.55319	up	1289.14	1429.24	1808.4	1692.41	1651.39	2124.86	1749.22	1375.1	1617.19	-0.327497	0	0.122865	0.134837	0.111509	0.108172	-0.711989	-0.468315	-0.370867	ZNF398	Homo sapiens zinc finger protein 398 (ZNF398), transcript variant 2, mRNA [NM_020781]	148879825	chr7	148879766	+	FALSE	hs|7q36.1	57541	NM_020781	zinc finger protein 398	chr7:148879766-148879825	GO:0005622|GO:0006355|GO:0008270|GO:0005634|GO:0045893|GO:0003677|GO:0046872	NM_020781	Hs.632032
A_24_P501520	0.0030727	1.02064	0.0294787	1.02064	up	1.89487	0.922102	1.89487	up	1.85655	0.892623	1.85655	up	196.632	199.397	265.055	235.112	292.65	370.181	233.934	161.451	199.843	-0.105661	0.484531	0.194633	0	0.270148	0.214919	-0.936192	-0.661557	-0.595052	MCART1	Homo sapiens mitochondrial carrier triple repeat 1 (MCART1), transcript variant 2, non-coding RNA [NR_024872]	37879595	chr9	37879536	-	FALSE	hs|9p13.2	92014	NR_024872	mitochondrial carrier triple repeat 1	chr9:37879595-37879536	GO:0005739|GO:0016020|GO:0006810|GO:0005743|GO:0016021	NR_024872	Hs.645492
A_23_P39550	0.00466478	-1.18584	-0.245912	1.18584	down	-3.00171	-1.58579	3.00171	down	-2.53129	-1.33987	2.53129	down	18.6488	19.099	18.391	11.435	23.3264	20.4297	207.371	24.3326	30.9507	0	-0.169493	-0.245841	0.658754	-0.164342	-0.172012	0.942173	1.75639	1.64346	TMEM163	Homo sapiens transmembrane protein 163 (TMEM163), mRNA [NM_030923]	135214230	chr2	135214171	-	FALSE	hs|2q21.3	81615	NM_030923	transmembrane protein 163	chr2:135214230-135214171	GO:0016020|GO:0016021	NM_030923	Hs.369471
A_24_P926211	0.00455396	-1.43161	-0.517638	1.43161	down	-2.94081	-1.55622	2.94081	down	-2.0542	-1.03858	2.0542	down	30.7692	29.2545	29.208	12.1154	23.8636	29.7729	166.99	31.6895	38.5175	0	-0.632374	-0.813247	-0.115074	0.390523	-0.168157	0.714868	1.24917	1.25899	YEATS2	Homo sapiens cDNA FLJ10201 fis, clone HEMBA1004923. [AK001063]	183509587	chr3	183509528	+	FALSE	hs|3q27.1	55689	AK001063	YEATS domain containing 2	chr3:183509528-183509587	GO:0005515|GO:0006355|GO:0043966|GO:0017025|GO:0005671|GO:0005634|GO:0000122|GO:0045892
A_24_P326398	0.002802	1.5127	0.597126	1.5127	up	-2.56704	-1.36011	2.56704	down	-3.88316	-1.95723	3.88316	down	22.9286	19.6313	24.5018	15.7876	30.1413	12.2105	335.732	22.6084	23.674	-0.228667	0	0.160953	-0.648929	-0.268122	-0.942041	0.748304	1.34494	1.91936	CRB2	Homo sapiens crumbs homolog 2 (Drosophila) (CRB2), mRNA [NM_173689]	126140251	chr9	126140192	+	FALSE	hs|9q33.3	286204	NM_173689	crumbs homolog 2 (Drosophila)	chr9:126140192-126140251	GO:0005886|GO:0005509|GO:0005576|GO:0016021	NM_173689	Hs.710092
A_24_P232545	0.000458799	2.53408	1.34146	2.53408	up	-2.54616	-1.34832	2.54616	down	-6.45216	-2.68978	6.45216	down	28.3405	19.9491	20.0786	26.5448	19.2522	18.3448	497.625	22.9059	32.0097	0	0.0884233	-0.496339	-1.49451	-1.27518	-1.6626	1.84887	0.782178	1.00601	HEPACAM	Homo sapiens hepatic and glial cell adhesion molecule (HEPACAM), mRNA [NM_152722]	124793643	chr11	124793289	-	FALSE	hs|11q24.2	220296	NM_152722	hepatic and glial cell adhesion molecule	chr11:124793643-124793289	GO:0007049|GO:0005737|GO:0016020|GO:0007050|GO:0016021|GO:0007155|GO:0040008	NM_152722	Hs.731034
A_32_P40463	0.00124358	2.18562	1.12804	2.18562	up	-2.91384	-1.54292	2.91384	down	-6.36855	-2.67097	6.36855	down	34.1856	32.6222	29.1138	40.8145	24.1523	28.7445	156.186	38.7072	49.1571	0	0.0469776	-1.07162	-1.52248	-1.21589	-1.6704	0.694185	1.50897	1.40097	NUDT9P1	Homo sapiens nudix (nucleoside diphosphate linked moiety X)-type motif 9 pseudogene 1 (NUDT9P1), non-coding RNA [NR_002779]	92911824	chr10	92911765	-	FALSE	hs|10q23.32	119369	NR_002779	nudix (nucleoside diphosphate linked moiety X)-type motif 9 pseudogene 1	chr10:92911824-92911765		NR_002779	Hs.441287
A_23_P20384	0.0068545	-1.04999	-0.07038	1.04999	down	1.72726	0.788489	1.72726	up	1.81362	0.858869	1.81362	up	1842.65	2479.05	3500.11	4291.69	3461.68	2727.33	1875.41	1552.13	1930.18	-0.235991	0.0385435	0.109322	0.099659	0.0233556	0	-1.21111	-0.710683	-0.531797	LSM1	Homo sapiens LSM1 homolog, U6 small nuclear RNA associated (S. cerevisiae) (LSM1), mRNA [NM_014462]	38021141	chr8	38021082	-	FALSE	hs|8p11.23	27257	NM_014462	LSM1 homolog, U6 small nuclear RNA associated (S. cerevisiae)	chr8:38021141-38021082	GO:0005515|GO:0006397|GO:0008380|GO:0016070|GO:0016071|GO:0003723|GO:0043928|GO:0005634|GO:0005829|GO:0005737|GO:0000375|GO:0030529|GO:0071044|GO:0000288	NM_014462	Hs.425311
A_23_P97265	0.0041249	-1.2035	-0.267241	1.2035	down	2.15505	1.10772	2.15505	up	2.59361	1.37496	2.59361	up	438.844	731.186	986.475	1169.6	898.248	817.439	646.43	477.772	510.852	-0.245904	0	0.522361	0.229168	0.304496	0.544516	-1.42035	-0.838252	-0.788107	GPATCH4	Homo sapiens G patch domain containing 4 (GPATCH4), transcript variant 2, mRNA [NM_182679]	156564382	chr1	156564323	-	FALSE	hs|1q23.1	54865	NM_182679	G patch domain containing 4	chr1:156564382-156564323	GO:0005622|GO:0003676	NM_182679	Hs.193832
A_24_P362432	0.0042194	-1.31387	-0.393819	1.31387	down	-1.23919	-0.309395	1.23919	down	1.06026	0.0844238	1.06026	up	457.621	369.86	556.868	587.248	610.998	762.564	1095.78	557.824	732.543	-0.273305	-0.224173	-0.272326	0.108647	0.129668	0.173337	0.223722	-0.065341	0	MDM4	Homo sapiens Mdm4 p53 binding protein homolog (mouse) (MDM4), transcript variant 1, mRNA [NM_002393]	204513669	chr1	204512020	+	FALSE	hs|1q32.1	4194	NM_002393	Mdm4 p53 binding protein homolog (mouse)	chr1:204512020-204513669	GO:0005515|GO:0071157|GO:0008284|GO:0043066|GO:0008285|GO:0008283|GO:0042177|GO:0050821|GO:0071456|GO:0006915|GO:0005634|GO:0000122|GO:0046872|GO:0045023|GO:0005622|GO:0006461|GO:0008270|GO:0019899	NM_002393	Hs.497492
A_32_P50973	0.00303256	-1.49213	-0.57737	1.49213	down	1.51062	0.595145	1.51062	up	2.25404	1.17251	2.25404	up	37.3658	39.8771	118.347	80.864	73.3261	70.2245	132.354	27.9999	40.7351	0.241942	-0.530457	0	0.501401	0.552189	0.390005	-0.805615	-0.676008	-0.592326		603082939F1 NIH_MGC_120 Homo sapiens cDNA clone IMAGE:5222217 5', mRNA sequence [BI836406]	91860818	chr4	91860759	+	FALSE	hs|4q22.1		BI836406		chr4:91860759-91860818			Hs.130203
A_24_P409115	0.000760085	-1.28156	-0.357897	1.28156	down	1.46094	0.546901	1.46094	up	1.87228	0.904798	1.87228	up	188.775	308.363	452.379	342.144	429.724	310.79	227.006	191.148	177.606	-0.0198189	0	0.381775	0.521611	0.481516	0.432521	-0.323775	-0.515624	-0.439347			33019980	chr9	33019921	-	FALSE	hs|9p21.1				chr9:033019980-033019921
A_24_P110403	0.0068347	-1.09561	-0.131737	1.09561	down	1.28949	0.366796	1.28949	up	1.41278	0.498532	1.41278	up	10204	18241.5	21665.9	23363.6	19903.6	16177.6	10573.1	10182.6	11328.1	-0.0811119	0.00526133	0.151395	0.250853	0.219901	0	-0.234119	-0.470923	-0.3198			204916094	chr1	204916035	+	FALSE	hs|1q32.1				chr1:204916035-204916094
A_23_P73501	0.00618325	-2.47238	-1.3059	2.47238	down	-1.27198	-0.347081	1.27198	down	1.94372	0.958819	1.94372	up	1172.16	1201.26	1492.32	2244.66	1861.75	1941.31	2223.82	1284.73	1768.86	0	-0.491812	-0.812709	0.58554	0.883155	1.14449	0.16205	-0.086221	-0.339106	SPANXD	Homo sapiens SPANX family, member D (SPANXD), mRNA [NM_032417]	140785771	chrX	140785712	-	FALSE	hs|Xq27.2	64648	NM_032417	SPANX family, member D	chrX:140785771-140785712	GO:0005737|GO:0005634	NM_032417	Hs.375036
A_23_P44974	0.00417959	-1.08427	-0.11672	1.08427	down	1.60026	0.678308	1.60026	up	1.73511	0.795028	1.73511	up	2949.66	3698.98	5468.61	5428.45	4797.22	5389.52	3756.39	2929.34	3434.3	-0.0431271	0	0.394627	0.301204	0.27052	0.129935	-0.776946	-0.384751	-0.521729	MRPL13	Homo sapiens mitochondrial ribosomal protein L13 (MRPL13), nuclear gene encoding mitochondrial protein, mRNA [NM_014078]	121408269	chr8	121408210	-	FALSE	hs|8q24.12	28998	NM_014078	mitochondrial ribosomal protein L13	chr8:121408269-121408210	GO:0005739|GO:0005515|GO:0003735|GO:0005761|GO:0005840|GO:0006412|GO:0005762	NM_014078	Hs.333823
A_24_P487736	0.000812491	-1.07503	-0.104373	1.07503	down	2.176	1.12168	2.176	up	2.33926	1.22605	2.33926	up	83.8078	117.481	143.497	141.486	128.553	161.302	171.907	52.7517	71.4919	-0.155063	0	0.359075	0.0972953	0.34789	0.0719458	-0.797129	-1.20375	-1.16015	CXorf23	Homo sapiens chromosome X open reading frame 23 (CXorf23), mRNA [NM_198279]	19934553	chrX	19934494	-	FALSE	hs|Xp22.12	256643	NM_198279	chromosome X open reading frame 23	chrX:19934553-19934494	GO:0005739	NM_198279	Hs.28896
A_24_P187859	0.00176277	1.94506	0.959816	1.94506	up	-1.99115	-0.993601	1.99115	down	-3.87291	-1.95342	3.87291	down	18.0396	11.8949	22.2478	13.1496	12.0397	26.0591	120.921	16.1485	20.0242	0	0.167888	-0.372943	-1.19505	-0.996716	-0.892736	0.586513	0.639671	1.54956		PREDICTED: Homo sapiens hypothetical protein LOC100130998 (LOC100130998), mRNA [XM_003118537]	71601826	chr5	71601767	-	FALSE	hs|5q13.2		XM_003118537		chr5:71601826-71601767		XM_003118537	Hs.730225
A_23_P203283	0.00228768	-1.17017	-0.226723	1.17017	down	1.51887	0.602998	1.51887	up	1.77734	0.829721	1.77734	up	318.116	312.696	548.65	610.693	590.648	546.634	706.194	311.955	409.823	-0.0947467	0	0.217632	0.215632	0.2913	0.296122	-0.298913	-0.757733	-0.629461	QSER1	Homo sapiens glutamine and serine rich 1 (QSER1), mRNA [NM_001076786]	32998455	chr11	32998396	+	FALSE	hs|11p13	79832	NM_001076786	glutamine and serine rich 1	chr11:32998396-32998455		NM_001076786	Hs.369368
A_24_P298224	0.00500703	1.9214	0.942159	1.9214	up	-2.14797	-1.10297	2.14797	down	-4.12711	-2.04513	4.12711	down	91.5688	86.225	104.885	140.767	110.605	122.133	351.055	107.723	150.14	0	0.0390821	-0.275902	-1.35312	-1.01006	-0.700119	1.83801	0.742207	0.491886	NCKAP5	Homo sapiens NCK-associated protein 5 (NCKAP5), transcript variant 2, mRNA [NM_207481]	133887553	chr2	133751757	-	FALSE	hs|2q21.2	344148	NM_207481	NCK-associated protein 5	chr2:133887553-133751757	GO:0005515|GO:0008150|GO:0005575	NM_207481	Hs.537329
A_23_P256107	0.000851937	-1.10439	-0.143249	1.10439	down	-2.97101	-1.57095	2.97101	down	-2.69018	-1.42771	2.69018	down	49.4183	53.2338	64.4601	46.9726	56.4157	73.2858	162.803	52.7046	65.8864	0.0315542	-0.0821171	-0.793567	-0.3361	0	-0.0782824	1.37789	1.26202	1.22882	HPSE	Homo sapiens heparanase (HPSE), transcript variant 1, mRNA [NM_006665]	84227383	chr4	84223390	-	FALSE	hs|4q21.23	10855	NM_006665	heparanase	chr4:84227383-84223390	GO:0004566|GO:0016020|GO:0043169|GO:0005975|GO:0016798|GO:0005634|GO:0005576|GO:0006029|GO:0007155|GO:0005765	NM_006665	Hs.44227
A_23_P158059	0.000610165	-1.03853	-0.0545454	1.03853	down	1.35366	0.436867	1.35366	up	1.40582	0.491413	1.40582	up	527.399	731.404	1066.99	718.556	924.814	916.739	597.295	582.643	469.604	0.00137222	0	0.0127266	0.00237563	-0.0328332	0.208193	-0.433257	-0.375291	-0.487955	ASB6	Homo sapiens ankyrin repeat and SOCS box containing 6 (ASB6), transcript variant 1, mRNA [NM_017873]	132399458	chr9	132399399	-	FALSE	hs|9q34.11	140459	NM_017873	ankyrin repeat and SOCS box containing 6	chr9:132399458-132399399	GO:0035556|GO:0005737	NM_017873	Hs.125037
A_24_P937319	0.00856602	-1.07635	-0.106148	1.07635	down	-1.40141	-0.486883	1.40141	down	-1.30201	-0.380735	1.30201	down	426.666	280.309	504.864	393.743	451.315	748.391	804.363	506.275	548.646	-0.135425	0	-0.235151	0.128628	-0.152247	-0.0285138	0.271806	0.306408	0.511859	HGS	Homo sapiens cDNA FLJ39878 fis, clone SPLEN2016045. [AK097197]	79665816	chr17	79665757	+	FALSE	hs|17q25.3	9146	AK097197	hepatocyte growth factor-regulated tyrosine kinase substrate	chr17:79665757-79665816	GO:0005515|GO:0008285|GO:0042176|GO:0019904|GO:0008333|GO:0042059|GO:0032585|GO:0006886|GO:0046872|GO:0046426|GO:0043231|GO:0005829|GO:0007165|GO:0005737|GO:0007173|GO:0016020|GO:0031901|GO:0016197|GO:0030141|GO:0005769|GO:0016044|GO:0005768
A_24_P780319	0.00407214	-1.85038	-0.887822	1.85038	down	1.09952	0.136868	1.09952	up	2.03452	1.02469	2.03452	up	2659.33	4436.41	5401.49	5474.2	5313.22	4528.77	3230.79	3149.38	2796.27	0.24109	-0.156068	-0.205748	0.581096	0.848273	1.11337	-0.414358	0	-0.116971							FALSE
A_32_P64889	0.00570727	-1.67893	-0.747544	1.67893	down	1.55846	0.640122	1.55846	up	2.61655	1.38767	2.61655	up	42.7917	43.3324	80.7395	55.8646	73.7448	84.7253	223.135	27.7018	44.8871	-0.260417	0	0.401154	0.66941	0.878115	0.835843	-0.120501	-0.6745	-0.984627	LOC100130705	Homo sapiens hypothetical protein LOC100130705 (LOC100130705), mRNA [NM_001195150]	128511723	chr7	128511664	+	FALSE	hs|7q32.1	100130705	NM_001195150	hypothetical protein LOC100130705	chr7:128511664-128511723		NM_001195150	Hs.641532
A_23_P87700	0.00227427	2.29187	1.19653	2.29187	up	-2.79807	-1.48443	2.79807	down	-6.41281	-2.68096	6.41281	down	20.846	14.3142	10.805	19.6392	14.6016	8.85326	189.63	17.8589	22.9248	0	0.045837	-1.24271	-1.68758	-1.88376	-1.2151	1.41073	0.627139	1.21856	MFAP5	Homo sapiens microfibrillar associated protein 5 (MFAP5), mRNA [NM_003480]	8800650	chr12	8800591	-	FALSE	hs|12p13.31	8076	NM_003480	microfibrillar associated protein 5	chr12:8800650-8800591	GO:0005578|GO:0001527|GO:0005576|GO:0005201	NM_003480	Hs.512842
A_24_P192183	0.00686859	-1.03097	-0.0439983	1.03097	down	1.76108	0.816462	1.76108	up	1.81562	0.86046	1.81562	up	2890.34	2896.33	4120.68	5343.53	3888.03	5133.84	3659.64	2513.03	3581.8	-0.011114	0.114619	0.0136709	0.151628	0	0.0975436	-1.23145	-0.530888	-0.56987	SEC63	Homo sapiens SEC63 homolog (S. cerevisiae) (SEC63), mRNA [NM_007214]	108218879	chr6	108215069	-	FALSE	hs|6q21	11231	NM_007214	SEC63 homolog (S. cerevisiae)	chr6:108218879-108215069	GO:0005515|GO:0016020|GO:0006457|GO:0005783|GO:0031072|GO:0006612|GO:0005789|GO:0004872|GO:0051082|GO:0016021|GO:0015031	NM_007214	Hs.26904
A_24_P230358	0.00901941	-1.18166	-0.240817	1.18166	down	-2.31348	-1.21007	2.31348	down	-1.95782	-0.969249	1.95782	down	42.5607	63.6181	136.228	55.8903	104.688	116.038	339.076	85.9467	42.8678	-0.348705	-0.524544	0.0808462	-0.0367312	0	-0.0332209	1.14995	1.28545	0.402396		1LI4_A Chain A, Human S-Adenosylhomocysteine Hydrolase Complexed With Neplanocin. {Homo sapiens} (exp=-1; wgp=0; cg=0), partial (23%) [THC2600308]	123483599	chr9	123483538	+	FALSE	hs|9q33.2				chr9:123483538-123483599
A_23_P11564	0.0094727	-1.30528	-0.384362	1.30528	down	1.12029	0.16387	1.12029	up	1.46229	0.548231	1.46229	up	993.523	1057.88	1622.19	1577.55	1701.96	1706.03	1307.89	1068.23	1232.51	-0.0879582	-0.125752	0.151932	0.3318	0.307752	0.451754	-0.374708	-0.178681	0	KIAA0494	Homo sapiens KIAA0494 (KIAA0494), mRNA [NM_014774]	47144187	chr1	47144128	-	FALSE	hs|1p33	9813	NM_014774	KIAA0494	chr1:47144187-47144128	GO:0005509	NM_014774	Hs.592859
A_23_P77066	0.00407774	-1.12169	-0.165676	1.12169	down	1.28934	0.366631	1.28934	up	1.44624	0.532307	1.44624	up	528.094	794.514	1281.28	570.031	979.074	1213.27	562.338	498.474	500.438	0	-0.16247	0.0776165	0.136143	0.14285	0.133181	-0.431606	-0.538689	-0.214454	SNRPN	Homo sapiens small nuclear ribonucleoprotein polypeptide N (SNRPN), transcript variant 4, mRNA [NM_022807]	25220582	chr15	25220523	+	FALSE	hs|15q11.2	6638	NM_022807	small nuclear ribonucleoprotein polypeptide N	chr15:25220523-25220582	GO:0008380|GO:0005515|GO:0003723|GO:0030532|GO:0005681|GO:0005634|GO:0042802	NM_022807	Hs.564847
A_23_P205867	0.0042063	-1.89453	-0.921842	1.89453	down	-1.80651	-0.853209	1.80651	down	1.04872	0.0686329	1.04872	up	38.0598	34.8602	40.6899	69.9841	61.2715	51.6139	151.608	46.1304	52.9399	-1.05235	-0.755824	-0.4494	-0.0749212	0.319068	0.263806	0.0598735	0	0.242181	NR2E3	Homo sapiens nuclear receptor subfamily 2, group E, member 3 (NR2E3), transcript variant 2, mRNA [NM_014249]	72110384	chr15	72110325	+	FALSE	hs|15q23	10002	NM_014249	nuclear receptor subfamily 2, group E, member 3	chr15:72110325-72110384	GO:0034339|GO:0010467|GO:0003700|GO:0006366|GO:0003707|GO:0005634|GO:0046872|GO:0043565|GO:0007165|GO:0005654|GO:0008270|GO:0004879|GO:0007602|GO:0005496|GO:0007601|GO:0030522|GO:0050896	NM_014249	Hs.187354
A_23_P42087	0.0092638	-1.14493	-0.19526	1.14493	down	1.44929	0.535345	1.44929	up	1.65933	0.730605	1.65933	up	1294.03	1496.31	1927.08	1851.83	1763.43	2334.15	1395.08	1139.09	1273.93	0.0230665	0.0343915	-0.0632096	0.329255	0	0.250772	-0.824239	-0.53494	-0.252609	BPHL	Homo sapiens biphenyl hydrolase-like (serine hydrolase) (BPHL), transcript variant 1, mRNA [NM_004332]	3152907	chr6	3152848	+	FALSE	hs|6p25.2	670	NM_004332	biphenyl hydrolase-like (serine hydrolase)	chr6:3152848-3152907	GO:0005739|GO:0006520|GO:0016787|GO:0009636	NM_004332	Hs.10136
A_23_P216679	0.00802707	-1.14387	-0.193929	1.14387	down	-1.8416	-0.880963	1.8416	down	-1.60997	-0.687033	1.60997	down	108.891	116.919	204.202	109.076	161.136	248.281	765.214	176.248	187.623	-0.586045	-0.339444	0	-0.0529679	0.0616045	-0.352338	0.384359	0.712776	0.620264	CDC14B	Homo sapiens CDC14 cell division cycle 14 homolog B (S. cerevisiae) (CDC14B), transcript variant 2, mRNA [NM_033331]	99263578	chr9	99263519	-	FALSE	hs|9q22.32	8555	NM_033331	CDC14 cell division cycle 14 homolog B (S. cerevisiae)	chr9:99263578-99263519	GO:0005515|GO:0031572|GO:0005730|GO:0005634|GO:0035335|GO:0051488|GO:0006281|GO:0006470|GO:0016787|GO:0005654|GO:0004722|GO:0008138|GO:0004725	NM_033331	Hs.40582
A_24_P943393	0.00729725	-1.11346	-0.155048	1.11346	down	1.30464	0.38365	1.30464	up	1.45266	0.538697	1.45266	up	8728.05	7071.4	10059.1	12112.7	10733.2	14247.8	10579.9	8110.75	11194.1	0.216511	-0.0520753	0	0.0788766	0.175036	0.375666	-0.383874	-0.20118	-0.401459	AHNAK	Homo sapiens AHNAK nucleoprotein (AHNAK), transcript variant 1, mRNA [NM_001620]	62283459	chr11	62283400	-	FALSE	hs|11q12.3	79026	NM_001620	AHNAK nucleoprotein	chr11:62283459-62283400	GO:0005515|GO:0005634|GO:0007399	NM_001620	Hs.502756
A_24_P341535	0.00692408	-1.13398	-0.181393	1.13398	down	1.74233	0.801021	1.74233	up	1.97577	0.982415	1.97577	up	70.1948	101.738	206.972	186.975	215.981	177.186	152.468	64.3987	68.1995	-0.339078	0.0947103	0.27023	0	0.311026	0.259016	-0.575464	-1.07873	-0.723012	LOC388152	Homo sapiens hypothetical LOC388152 (LOC388152), non-coding RNA [NR_027001]	84873671	chr15	84873612	-	FALSE	hs|15q25.2	388152	NR_027001	hypothetical LOC388152	chr15:84873671-84873612		NR_027001	Hs.405809
A_23_P256047	0.00122587	1.05985	0.0838539	1.05985	up	2.191	1.13159	2.191	up	2.06728	1.04773	2.06728	up	73.3797	84.5456	108.402	92.3408	107.999	128.83	76.3012	48.3827	58.8626	0.265163	-0.122002	0.380323	0.0445189	0.227403	0	-1.12473	-1.06844	-0.678107	ANKRD5	Homo sapiens ankyrin repeat domain 5 (ANKRD5), transcript variant 1, mRNA [NM_022096]	10036945	chr20	10036886	+	FALSE	hs|20p12.2	63926	NM_022096	ankyrin repeat domain 5	chr20:10036886-10036945	GO:0005509	NM_022096	Hs.70903
A_24_P110354	0.00486694	1.0166	0.0237472	1.0166	up	-1.99852	-0.99893	1.99852	down	-2.03169	-1.02268	2.03169	down	24.2615	13.3487	16.9997	32.7073	23.5267	16.6494	303.129	15.5317	23.2171	-0.344747	0.221296	-0.256878	-0.209069	-0.242501	0	0.540392	0.911752	1.16432		chromosome 5 open reading frame 50 [Source:HGNC Symbol;Acc:34440] [ENST00000330910]	171217848	chr5	171217544	+	FALSE	hs|5q35.1		XM_003119961		chr5:171217544-171217848		XM_003119961	Hs.591740
A_23_P18413	0.0035982	-1.16179	-0.216355	1.16179	down	1.47236	0.558133	1.47236	up	1.71058	0.774487	1.71058	up	5656.28	7855.01	11598.3	12765.7	10326.6	10389.4	5946.41	5335.39	5858.72	-0.176274	0	0.366515	0.324133	0.207421	0.307751	-0.565838	-0.411832	-0.506488	TIMMDC1	Homo sapiens translocase of inner mitochondrial membrane domain containing 1 (TIMMDC1), nuclear gene encoding mitochondrial protein, mRNA [NM_016589]	119242752	chr3	119242693	+	FALSE	hs|3q13.33	51300	NM_016589	translocase of inner mitochondrial membrane domain containing 1	chr3:119242693-119242752	GO:0005739|GO:0016020|GO:0008565|GO:0005743|GO:0016021	NM_016589	Hs.477287
A_23_P104046	0.00739825	-1.43397	-0.520018	1.43397	down	1.17527	0.232995	1.17527	up	1.68531	0.753013	1.68531	up	272.513	386.396	558.442	443.004	613.377	734.803	449.532	333.024	342.043	0	-0.0734506	0.470422	0.690079	0.765169	0.501777	-0.04466	-0.121047	-0.136306	BPNT1	Homo sapiens 3'(2'), 5'-bisphosphate nucleotidase 1 (BPNT1), mRNA [NM_006085]	220233109	chr1	220233050	-	FALSE	hs|1q41	10380	NM_006085	3'(2'), 5'-bisphosphate nucleotidase 1	chr1:220233109-220233050	GO:0006139|GO:0008441|GO:0006805|GO:0000287|GO:0050427|GO:0016787|GO:0004437|GO:0007399|GO:0005829	NM_006085	Hs.406134
A_23_P106933	0.0096544	1.94657	0.960932	1.94657	up	-2.35927	-1.23834	2.35927	down	-4.59248	-2.19927	4.59248	down	25.209	32.2042	25.2399	28.0214	27.252	27.9619	186.466	36.7231	36.5156	0.155148	-0.373642	0	-0.58107	-0.591204	-1.92901	0.715932	0.99029	1.79031	ACSM1	Homo sapiens acyl-CoA synthetase medium-chain family member 1 (ACSM1), mRNA [NM_052956]	20634888	chr16	20634829	-	FALSE	hs|16p12.3	116285	NM_052956	acyl-CoA synthetase medium-chain family member 1	chr16:20634888-20634829	GO:0006629|GO:0019395|GO:0006805|GO:0016874|GO:0018874|GO:0003824|GO:0005525|GO:0005524|GO:0047760|GO:0046872|GO:0005739|GO:0015645|GO:0000166|GO:0005759|GO:0006633|GO:0003996|GO:0019605|GO:0016405|GO:0015980	NM_052956	Hs.306812
A_32_P234405	0.00129701	-1.75576	-0.812093	1.75576	down	-3.57188	-1.83669	3.57188	down	-2.03438	-1.02459	2.03438	down	26.3967	26.0722	50.8878	46.1492	59.7336	35.0542	1046.8	27.6168	34.9425	-1.11706	-1.16642	-0.809347	-0.802077	0	0.145528	0.921912	0.691961	0.803356			207102117	chr1	207102058	+	FALSE	hs|1q32.1				chr1:207102058-207102117
A_23_P28857	0.00588685	-1.37296	-0.457288	1.37296	down	-2.93394	-1.55284	2.93394	down	-2.13695	-1.09555	2.13695	down	36.9684	32.2045	43.8765	50.0971	49.3105	48.0709	723.072	32.7549	42.8564	-0.956593	-0.745275	-0.158484	-0.70513	0.21664	0	1.08601	0.860767	0.851379	SIRPG	Homo sapiens signal-regulatory protein gamma (SIRPG), transcript variant 1, mRNA [NM_018556]	1609978	chr20	1609919	-	FALSE	hs|20p13	55423	NM_018556	signal-regulatory protein gamma	chr20:1609978-1609919	GO:0005515|GO:0008284|GO:0008285|GO:0022409|GO:0005886|GO:0034329|GO:0007267|GO:0050900|GO:0005622|GO:0035556|GO:0016020|GO:0007596|GO:0050870|GO:0016021|GO:0007155	NM_018556	Hs.590883
A_23_P63825	0.00209797	-1.09255	-0.127696	1.09255	down	1.40785	0.493497	1.40785	up	1.53815	0.621193	1.53815	up	1371.23	1582.68	2461.73	1865.54	2366.14	2338.79	1425.04	1162.18	1393.41	0.124033	-0.163792	0	0.0525113	0.0969021	0.193916	-0.478988	-0.664678	-0.376583	GOT1	Homo sapiens glutamic-oxaloacetic transaminase 1, soluble (aspartate aminotransferase 1) (GOT1), mRNA [NM_002079]	101157284	chr10	101157225	-	FALSE	hs|10q24.2	2805	NM_002079	glutamic-oxaloacetic transaminase 1, soluble (aspartate aminotransferase 1)	chr10:101157284-101157225	GO:0031406|GO:0006531|GO:0006532|GO:0006533|GO:0006094|GO:0005764|GO:0019551|GO:0005829|GO:0019550|GO:0034641|GO:0005737|GO:0006103|GO:0006006|GO:0043679|GO:0004609|GO:0004069|GO:0032869|GO:0006536|GO:0009058|GO:0005975|GO:0006107|GO:0055089|GO:0008652|GO:0051384|GO:0005625|GO:0006114|GO:0030170	NM_002079	Hs.500756
A_24_P944253	0.0029069	1.76435	0.819138	1.76435	up	-2.22809	-1.15581	2.22809	down	-3.93113	-1.97494	3.93113	down	53.3575	57.8598	77.1107	73.9651	70.1291	88.8617	227.641	55.2555	68.2709	0	-0.297942	0.129833	-1.10212	-1.0177	-0.505699	1.76812	0.699089	0.832099	KLHL6	Homo sapiens kelch-like 6 (Drosophila) (KLHL6), mRNA [NM_130446]	183208877	chr3	183208818	-	FALSE	hs|3q27.1	89857	NM_130446	kelch-like 6 (Drosophila)	chr3:183208877-183208818	GO:0050853|GO:0002467	NM_130446	Hs.659147
A_24_P761386	0.00920237	-1.1815	-0.240617	1.1815	down	1.99887	0.999185	1.99887	up	2.36166	1.2398	2.36166	up	85.4843	137.31	256.322	219.034	236.111	175.071	121.495	68.1037	81.1686	-0.0110961	0	0.94099	0.597441	0.669178	0.385126	-0.527231	-0.830158	-0.710272			8414367	chr18	8414308	+	FALSE	hs|18p11.23				chr18:008414308-008414367
A_23_P350045	0.00141733	-1.01384	-0.0198266	1.01384	down	1.36172	0.445432	1.36172	up	1.38056	0.465258	1.38056	up	2134.17	2652.8	3524.41	3805.68	3170.23	3466.23	2977.06	1747.08	2181.75	0	0.0149224	0.0614131	0.0882007	0.116993	-0.0693786	-0.301182	-0.54719	-0.411589	REEP5	Homo sapiens receptor accessory protein 5 (REEP5), mRNA [NM_005669]	112212209	chr5	112212150	-	FALSE	hs|5q22.2	7905	NM_005669	receptor accessory protein 5	chr5:112212209-112212150	GO:0005515|GO:0008150|GO:0003674|GO:0016020|GO:0016021	NM_005669	Hs.429608
A_23_P257924	0.0027939	1.13856	0.187207	1.13856	up	-1.26971	-0.3445	1.26971	down	-1.44564	-0.531706	1.44564	down	1441.45	1756.65	2276.11	2084.65	1814.88	2084.49	2262.34	1331.32	1783.22	0.0802574	-0.117668	0	-0.269592	-0.297856	-0.0315819	0.371599	0.254826	0.369663	ETS2	Homo sapiens v-ets erythroblastosis virus E26 oncogene homolog 2 (avian) (ETS2), mRNA [NM_005239]	40195622	chr21	40195563	+	FALSE	hs|21q22.2	2114	NM_005239	v-ets erythroblastosis virus E26 oncogene homolog 2 (avian)	chr21:40195563-40195622	GO:0043565|GO:0005515|GO:0006355|GO:0001501|GO:0003700|GO:0045944|GO:0005634|GO:0035259|GO:0045893|GO:0003677|GO:0006351	NM_005239	Hs.644231
A_32_P87013	0.00185231	-8.62448	-3.10844	8.62448	down	1.06904	0.0963101	1.06904	up	9.21988	3.20475	9.21988	up	112.192	146.504	200.134	314.402	348.313	517.697	210.155	106.493	187.331	-0.2416	-0.652091	0	2.56948	2.90562	2.95652	-1.64345	0.49991	-0.0390787	IL8	Homo sapiens interleukin 8 (IL8), mRNA [NM_000584]	74609324	chr4	74609265	+	FALSE	hs|4q13.3	3576	NM_000584	interleukin 8	chr4:74609265-74609324	GO:0005515|GO:0005153|GO:0008285|GO:0019722|GO:0002237|GO:0006928|GO:0005615|GO:0030155|GO:0005622|GO:0035556|GO:0045091|GO:0006955|GO:0006954|GO:0006935|GO:0007050|GO:0030097|GO:0008009|GO:0030593|GO:0005576|GO:0001525|GO:0048566|GO:0050930|GO:0007165|GO:0071222|GO:0007186|GO:0090023|GO:0042119	NM_000584	Hs.624
A_24_P913517	0.00768076	1.13332	0.180558	1.13332	up	-1.66631	-0.736653	1.66631	down	-1.88846	-0.91721	1.88846	down	25.1137	14.5309	27.3398	22.3092	30.8054	24.4094	712.372	15.5758	22.3349	0	-0.337546	0.415378	-0.0508365	-0.207641	-0.205364	0.872788	0.586346	0.828656			167768854	chr5	167768795	-	FALSE	hs|5q34				chr5:167768854-167768795
A_23_P130158	0.00531711	-1.16888	-0.225127	1.16888	down	1.37153	0.455786	1.37153	up	1.60315	0.680913	1.60315	up	336.176	290.581	423.863	575.883	446.794	529.073	1005.99	281.031	485.014	-0.144368	0.0928125	0	0.123729	0.226558	0.273539	-0.462358	-0.715128	-0.241428	WNT3	Homo sapiens wingless-type MMTV integration site family, member 3 (WNT3), mRNA [NM_030753]	44841763	chr17	44841704	-	FALSE	hs|17q21.31	7473	NM_030753	wingless-type MMTV integration site family, member 3	chr17:44841763-44841704	GO:0005515|GO:0008284|GO:0060064|GO:0005886|GO:0071300|GO:0045599|GO:0048843|GO:0044339|GO:0044338|GO:0005110|GO:0005615|GO:0007223|GO:0009950|GO:0005109|GO:0009880|GO:0005737|GO:0009948|GO:0007411|GO:0030182|GO:0060070|GO:0042472|GO:0001707|GO:0005770|GO:0061180|GO:0019904|GO:0005578|GO:0005102|GO:0005624|GO:0005576|GO:0007275|GO:0010628|GO:0048697|GO:0000902|GO:0071425|GO:0060323|GO:0035116|GO:…	NM_030753	Hs.445884
A_23_P388168	0.000994663	-1.63161	-0.706296	1.63161	down	1.74547	0.803615	1.74547	up	2.84793	1.50991	2.84793	up	122.207	157.632	248.245	216.577	243.946	287.45	195.167	112.244	115.301	-0.157833	0.0124688	0	0.79523	0.53869	0.639605	-0.455206	-0.83595	-1.26505	RAB3B	Homo sapiens RAB3B, member RAS oncogene family (RAB3B), mRNA [NM_002867]	52385367	chr1	52385308	-	FALSE	hs|1p32.3	5865	NM_002867	RAB3B, member RAS oncogene family	chr1:52385367-52385308	GO:0006184|GO:0018125|GO:0005886|GO:0000166|GO:0007264|GO:0017157|GO:0003924|GO:0015031|GO:0005525|GO:0008021|GO:0005829	NM_002867	Hs.123072
A_23_P317919	0.00135758	-1.07292	-0.101538	1.07292	down	2.85166	1.5118	2.85166	up	3.05959	1.61334	3.05959	up	127.637	180.429	279.029	243.306	223.011	233.73	175.637	79.2258	109.619	0.305791	0	0.363266	0.677315	0.471269	-0.174913	-1.20831	-1.58255	-1.07549	ZNF273	Homo sapiens zinc finger protein 273 (ZNF273), transcript variant 1, mRNA [NM_021148]	64390750	chr7	64390691	+	FALSE	hs|7q11.21	10793	NM_021148	zinc finger protein 273	chr7:64390691-64390750	GO:0005622|GO:0006355|GO:0008270|GO:0005634|GO:0003676|GO:0003677|GO:0046872	NM_021148	Hs.520889
A_23_P77360	0.00954064	-1.14551	-0.195991	1.14551	down	1.24271	0.313489	1.24271	up	1.42354	0.50948	1.42354	up	3785.28	3854.89	5882.71	6467.07	5607.54	5440.31	4522.06	3543.98	4204.84	-0.0413286	0	0.274553	0.168562	0.273043	0.379593	-0.255052	-0.337638	-0.114553	CIAO1	Homo sapiens cytosolic iron-sulfur protein assembly 1 (CIAO1), mRNA [NM_004804]	96937304	chr2	96937245	+	FALSE	hs|2q11.2	9391	NM_004804	cytosolic iron-sulfur protein assembly 1	chr2:96937245-96937304	GO:0005515|GO:0008284|GO:0007059|GO:0016226|GO:0006357|GO:0071817	NM_004804	Hs.12109
A_23_P149301	0.00911482	-1.21147	-0.276763	1.21147	down	1.20878	0.273556	1.20878	up	1.46441	0.550319	1.46441	up	2732.05	3117.51	4657.23	4768.97	4666.24	3284.76	3092.24	3421.92	3692.97	0	-0.0054931	0.205853	0.232631	0.403591	0.394426	-0.377683	-0.240924	-0.00170231	HIST3H2A	Homo sapiens histone cluster 3, H2a (HIST3H2A), mRNA [NM_033445]	228645309	chr1	228645250	-	FALSE	hs|1q42.13	92815	NM_033445	histone cluster 3, H2a	chr1:228645309-228645250	GO:0005694|GO:0006334|GO:0005634|GO:0000786|GO:0003677	NM_033445	Hs.26331
A_32_P188065	0.00634723	2.79657	1.48366	2.79657	up	-1.65986	-0.731063	1.65986	down	-4.64191	-2.21472	4.64191	down	16.704	12.5033	15.928	19.1586	11.9784	10.9956	165.95	17.7705	19.2381	0.1828	0	-0.68758	-1.56548	-1.80934	-1.58093	0.19541	0.0133119	1.47969			85886185	chr2	85886126	+	FALSE	hs|2p11.2				chr2:085886126-085886185
A_24_P815091	0.00623351	2.40951	1.26874	2.40951	up	1.07254	0.101027	1.07254	up	-2.24655	-1.16771	2.24655	down	77.5589	79.7577	62.8483	129.653	114.807	54.1576	391.258	73.2441	115.305	0.798127	0.0649133	-0.0907251	-1.0486	-1.25855	-0.72675	0	0.379702	0.0895314		ALU1_HUMAN (P39188) Alu subfamily J sequence contamination warning entry, partial (13%) [THC2755576]	45254639	chr22	45254580	+	FALSE	hs|22q13.31				chr22:045254580-045254639
A_23_P133000	0.00507966	-1.22527	-0.293099	1.22527	down	1.74292	0.80151	1.74292	up	2.13555	1.09461	2.13555	up	9652.92	8713.1	12402.4	10309.1	11031.3	9395.62	7238.34	5927.95	12930.8	-0.402036	0.0177491	0.115317	0	0.340112	0.270215	-1.23778	-0.762835	-0.672887		Nbla00301 (NBLA00301), non-coding RNA [Source:RefSeq DNA;Acc:NR_003679] [ENST00000514673]	174460114	chr4	174460055	+	FALSE	hs|4q34.1		AB075501		chr4:174460055-174460114			Hs.61435
A_32_P19840	0.00307239	-1.25261	-0.324932	1.25261	down	1.65838	0.729777	1.65838	up	2.0773	1.05471	2.0773	up	1300.42	1083.6	1645.37	1859.82	1777.36	2461.14	1505.92	980.981	1412.73	-0.173737	0.156334	0	0.229805	0.277182	0.450405	-1.07921	-0.703686	-0.423836	LOC100507507	PREDICTED: Homo sapiens hypothetical LOC100507507 (LOC100507507), partial miscRNA [XR_108783]	143076846	chr7	143076787	-	FALSE	hs|7q34	100507507	XR_108783	hypothetical LOC100507507	chr7:143076846-143076787		XR_108783	Hs.626125
A_23_P158041	0.00872065	-1.51784	-0.602024	1.51784	down	-2.18038	-1.12458	2.18038	down	-1.4365	-0.522556	1.4365	down	40.6102	38.094	63.3804	66.602	58.0607	59.4887	326.28	41.3496	53.0649	-0.606464	-0.656423	-0.219726	0.382885	0	-0.0594258	1.04568	0.376538	0.468911	AQP7	Homo sapiens aquaporin 7 (AQP7), mRNA [NM_001170]	33395133	chr9	33387089	-	FALSE	hs|9p13.3	364	NM_001170	aquaporin 7	chr9:33395133-33387089	GO:0005215|GO:0007588|GO:0005886|GO:0042493|GO:0031526|GO:0006091|GO:0007283|GO:0070295|GO:0055085|GO:0015840|GO:0005737|GO:0016020|GO:0005887|GO:0005911|GO:0030529|GO:0015250|GO:0015793|GO:0015265|GO:0016021|GO:0006833|GO:0015254	NM_001170	Hs.455323
A_23_P251795	0.000418489	-1.0442	-0.062396	1.0442	down	1.47524	0.560951	1.47524	up	1.54044	0.623347	1.54044	up	4098.81	4696.26	5577	6135.19	5527.79	5628.94	3929.64	2690.25	4613.93	-0.014966	0.0664587	0	0.087986	0.10816	0.0425346	-0.520273	-0.714165	-0.396921	GPC2	Homo sapiens glypican 2 (GPC2), mRNA [NM_152742]	99767426	chr7	99767367	-	FALSE	hs|7q22.1	221914	NM_152742	glypican 2	chr7:99767426-99767367	GO:0005886|GO:0005783|GO:0030182|GO:0005578|GO:0043395|GO:0005576|GO:0031225|GO:0005615	NM_152742	Hs.211701
A_24_P18965	0.00381912	1.01888	0.0269888	1.01888	up	-1.98353	-0.988067	1.98353	down	-2.02098	-1.01506	2.02098	down	26.7348	20.0921	46.3209	56.2379	46.5484	41.3186	205.345	20.8126	26.9303	0	-0.149617	-0.267027	-0.226466	-0.388127	0.116984	1.02298	0.481493	1.04308	FAM134C	Homo sapiens family with sequence similarity 134, member C (FAM134C), transcript variant 1, mRNA [NM_178126]	40734213	chr17	40734154	-	FALSE	hs|17q21.2	162427	NM_178126	family with sequence similarity 134, member C	chr17:40734213-40734154	GO:0016020|GO:0016021	NM_178126	Hs.632262
A_23_P87323	0.00990435	1.11435	0.156202	1.11435	up	1.51167	0.596147	1.51167	up	1.35655	0.439945	1.35655	up	1315.9	1379.13	2045.99	1422.58	1488.6	2163.72	1361.08	984.372	1309.14	0.17978	0.308569	0.170007	0.285135	0	-0.0953865	-0.577381	-0.33126	-0.221445	COMMD9	Homo sapiens COMM domain containing 9 (COMMD9), transcript variant 1, mRNA [NM_014186]	36295823	chr11	36295764	-	FALSE	hs|11p13	29099	NM_014186	COMM domain containing 9	chr11:36295823-36295764		NM_014186	Hs.279836
A_24_P792075	0.000582124	1.31837	0.398759	1.31837	up	-2.51654	-1.33144	2.51654	down	-3.31774	-1.7302	3.31774	down	25.0657	22.1987	40.296	43.9716	35.3177	32.2925	665.443	29.303	32.1477	0	-0.231002	0.118562	-0.141657	-0.663033	-0.504028	1.2722	0.956997	1.65269		th94f09.x1 Soares_NSF_F8_9W_OT_PA_P_S1 Homo sapiens cDNA clone IMAGE:2126345 3', mRNA sequence [AI435457]	63786735	chr1	63786676	+	FALSE	hs|1p31.3		AI435457		chr1:63786676-63786735			Hs.120204
A_23_P322632	0.00698212	1.15226	0.204462	1.15226	up	-4.42698	-2.14632	4.42698	down	-5.10101	-2.35078	5.10101	down	27.4081	17.7738	16.4082	33.0171	14.4459	10.5632	822.386	24.1044	29.4905	-0.265908	0.523078	-1.15504	0	-0.967533	-0.543721	1.30453	1.91508	2.32149	NCRNA00277	Homo sapiens non-protein coding RNA 277 (NCRNA00277), non-coding RNA [NR_026949]	69387289	chr15	69387230	+	FALSE	hs|15q23	283673	NR_026949	non-protein coding RNA 277	chr15:69387230-69387289		NR_026949	Hs.177927
A_23_P315651	0.00183544	1.51814	0.6023	1.51814	up	-2.17356	-1.12006	2.17356	down	-3.29976	-1.72236	3.29976	down	28.4613	20.0894	38.2103	19.5782	29.6362	39.3582	381.318	36.2855	37.4327	-0.241967	0.366307	0	-0.310383	-0.837451	-0.534725	1.30281	0.715299	1.46641	CYBA	Homo sapiens cytochrome b-245, alpha polypeptide, mRNA (cDNA clone IMAGE:5217162), with apparent retained intron. [BC028224]	88710636	chr16	88710577	-	FALSE	hs|16q24.3	1535	BC028224	cytochrome b-245, alpha polypeptide	chr16:88710636-88710577	GO:0045730|GO:0005515|GO:0017124|GO:0030307|GO:0006801|GO:0071480|GO:0050665|GO:0046872|GO:0030425|GO:0005739|GO:0005737|GO:0016324|GO:0006954|GO:0071230|GO:0016175|GO:0071356|GO:0043025|GO:0006810|GO:0031667|GO:0071333|GO:0030141|GO:0070555|GO:0042554|GO:0005794|GO:0046982|GO:0042493|GO:0009055|GO:0097038|GO:0014895|GO:0003106|GO:0071407|GO:0016020|GO:0001938|GO:0045087|GO:0008217|GO:0016491|GO:…		Hs.513803
A_24_P930049	0.00730831	2.06197	1.04403	2.06197	up	-1.72268	-0.784652	1.72268	down	-3.55211	-1.82868	3.55211	down	18.6752	14.4487	10.895	23.1032	12.6273	12.6182	138.731	21.2608	26.8115	0	0.411957	-0.865421	-1.48229	-0.990182	-1.11307	0.270032	0.680241	0.950218		ALU1_HUMAN (P39188) Alu subfamily J sequence contamination warning entry, partial (15%) [THC2630983]	50038503	chr20	50038444	-	FALSE	hs|20q13.2				chr20:050038503-050038444
A_32_P39093	0.00366865	-1.05452	-0.0765869	1.05452	down	1.23961	0.309881	1.23961	up	1.30719	0.386468	1.30719	up	713.533	1122.53	1429.67	1544.97	1231.4	1369.05	1203.68	674.854	809.441	0	-0.0682106	0.132375	0.00344455	0.0770739	0.213407	-0.327783	-0.268957	-0.268738	FAM108C1	Homo sapiens family with sequence similarity 108, member C1 (FAM108C1), mRNA [NM_021214]	81047944	chr15	81047885	+	FALSE	hs|15q25.1	58489	NM_021214	family with sequence similarity 108, member C1	chr15:81047885-81047944	GO:0016787	NM_021214	Hs.459072
A_23_P125117	0.00391568	-1.21846	-0.285063	1.21846	down	1.58909	0.668202	1.58909	up	1.93625	0.953265	1.93625	up	625.294	940.04	1205.02	1061.24	1276.85	1306.14	615.021	517.887	605.161	-0.00246346	0.0911378	0	0.381611	0.358083	0.20417	-1.0108	-0.588135	-0.316997	KLHDC8B	Homo sapiens kelch domain containing 8B (KLHDC8B), mRNA [NM_173546]	49213586	chr3	49213527	+	FALSE	hs|3p21.31	200942	NM_173546	kelch domain containing 8B	chr3:49213527-49213586	GO:0005737	NM_173546	Hs.13781
A_24_P366457	0.00236841	1.04698	0.066234	1.04698	up	1.49969	0.584662	1.49969	up	1.43239	0.518428	1.43239	up	7128.53	10567.4	17090	14706.4	15117	12584.5	7284.2	6557.57	7038.36	0.0309392	0	0.320404	0.0526743	0.126176	-0.0262089	-0.441282	-0.382029	-0.579332			114160641	chr6	114160582	+	FALSE	hs|6q21				chr6:114160582-114160641
A_23_P361604	0.00575954	-1.64125	-0.714791	1.64125	down	-2.26118	-1.17708	2.26118	down	-1.37772	-0.462287	1.37772	down	27.3438	24.9836	91.2429	99.1126	82.8798	94.6732	487.944	29.783	37.7193	-1.13724	-0.822087	-0.235885	-0.123451	0.07261	0	0.480168	0.325654	0.530197	LOC100128496	Homo sapiens hypothetical protein LOC100128496 (LOC100128496), mRNA [NM_001242671]	18790443	chr20	18790384	-	FALSE	hs|20p11.23	100128496	NM_001242671	hypothetical protein LOC100128496	chr20:18790443-18790384		NM_001242671	Hs.664484
A_23_P140654	0.00611397	1.40008	0.485509	1.40008	up	-2.50715	-1.32605	2.50715	down	-3.51021	-1.81156	3.51021	down	45.9856	43.3048	35.9093	39.8264	31.7881	59.756	131.726	48.3417	64.0084	0	0.0818458	-0.971737	-0.973246	-1.1542	-0.218974	1.06048	1.00909	1.01869			96938216	chr15	96938157	+	FALSE	hs|15q26.2				chr15:096938157-096938216
A_24_P53778	0.00707928	-1.43036	-0.516379	1.43036	down	-2.69057	-1.42791	2.69057	down	-1.88104	-0.911531	1.88104	down	40.1778	32.336	57.9166	61.9787	58.9001	62.4488	639.6	34.038	43.8784	-0.767062	-0.444954	-0.454904	0.0544105	-0.172193	0	1.5249	0.470514	0.621395	ITLN2	Homo sapiens intelectin 2 (ITLN2), mRNA [NM_080878]	160915027	chr1	160914968	-	FALSE	hs|1q23.3	142683	NM_080878	intelectin 2	chr1:160915027-160914968	GO:0007165|GO:0005529|GO:0005102|GO:0005576	NM_080878	Hs.385631
A_23_P214876	0.00109825	-1.01216	-0.0174408	1.01216	down	1.41661	0.502446	1.41661	up	1.43384	0.519887	1.43384	up	1259.53	1371.36	2038.34	1922.45	1842.81	2317.01	1637.03	986.111	1223.44	0.134191	-0.00130558	0.0376596	0	0.172747	0.0501214	-0.593476	-0.401996	-0.341321	JARID2	Homo sapiens jumonji, AT rich interactive domain 2 (JARID2), mRNA [NM_004973]	15521864	chr6	15521805	+	FALSE	hs|6p22.3	3720	NM_004973	jumonji, AT rich interactive domain 2	chr6:15521805-15521864	GO:0008285|GO:0032452|GO:0048538|GO:0005634|GO:0007275|GO:0000122|GO:0048536|GO:0007417|GO:0003677|GO:0048863|GO:0001889|GO:0005622|GO:0031061|GO:0051574|GO:0035097|GO:0035098|GO:0003682|GO:0045892|GO:0016568	NM_004973	Hs.269059
A_24_P176404	0.0092383	-1.04157	-0.0587581	1.04157	down	1.8205	0.864336	1.8205	up	1.89618	0.923094	1.89618	up	981.091	998.861	1465.24	1585.49	1314.05	1825.35	1137.95	816.48	1163.28	-0.222015	0.167606	0.152845	0.191213	0	0.0834979	-1.28445	-0.636445	-0.573676	ZFP90	Homo sapiens zinc finger protein 90 homolog (mouse) (ZFP90), mRNA [NM_133458]	68599696	chr16	68599637	+	FALSE	hs|16q22.1	146198	NM_133458	zinc finger protein 90 homolog (mouse)	chr16:68599637-68599696	GO:0005622|GO:0008270|GO:0005634|GO:0045893|GO:0003677|GO:0046872	NM_133458	Hs.461074
A_23_P10559	0.00660566	-1.10357	-0.142173	1.10357	down	1.04801	0.0676477	1.04801	up	1.15654	0.209821	1.15654	up	1344.67	1291.04	1751.84	1692.71	1533.72	2215.52	2590.44	1204.75	1945.05	0	-0.0278149	0.0274545	0.21513	0.0988656	0.112163	-0.113958	-0.00551033	-0.0838356	AATK	Homo sapiens apoptosis-associated tyrosine kinase (AATK), transcript variant 1, mRNA [NM_001080395]	79091254	chr17	79091195	-	FALSE	hs|17q25.3	9625	NM_001080395	apoptosis-associated tyrosine kinase	chr17:79091254-79091195	GO:0005739|GO:0005515|GO:0048471|GO:0005737|GO:0046777|GO:0016020|GO:0000166|GO:0004674|GO:0006915|GO:0016021|GO:0004713|GO:0005524	NM_001080395	Hs.514575
A_23_P10127	0.00440939	-1.93123	-0.949518	1.93123	down	1.01318	0.018895	1.01318	up	1.95669	0.968413	1.95669	up	2856.57	2855.3	3595.7	5146.04	4188.95	5409.9	4834.79	2301.83	3292.27	0	-0.267266	-0.168682	0.597251	0.894314	0.921041	0.0947463	-0.575769	-0.0116113	SFRP1	Homo sapiens secreted frizzled-related protein 1 (SFRP1), mRNA [NM_003012]	41119724	chr8	41119665	-	FALSE	hs|8p11.21	6422	NM_003012	secreted frizzled-related protein 1	chr8:41119724-41119665	GO:0008406|GO:0014070|GO:0017147|GO:0030308|GO:0033689|GO:0030307|GO:0001756|GO:0050732|GO:0050680|GO:0042995|GO:0009790|GO:0010564|GO:0005615|GO:0032855|GO:0042802|GO:0005109|GO:0005622|GO:0014034|GO:0046676|GO:0001944|GO:0050679|GO:0030336|GO:0009986|GO:0001843|GO:0030165|GO:0001649|GO:0007420|GO:0051496|GO:0045600|GO:0045893|GO:0045892|GO:0001954|GO:0045578|GO:0008284|GO:0008285|GO:0005886|GO:…	NM_003012	Hs.213424
A_23_P117654	0.00553914	-1.08062	-0.111859	1.08062	down	1.40247	0.487974	1.40247	up	1.51554	0.599832	1.51554	up	780.691	711.133	1118.56	1023.68	888.017	1509.32	1290.24	613.8	941.353	0.136468	-0.194169	0	0.167453	0.00913048	0.101292	-0.376704	-0.709968	-0.434951	MYO5A	Homo sapiens myosin VA (heavy chain 12, myoxin) (MYO5A), transcript variant 1, mRNA [NM_000259]	52605568	chr15	52605509	-	FALSE	hs|15q21.2	4644	NM_000259	myosin VA (heavy chain 12, myoxin)	chr15:52605568-52605509	GO:0030048|GO:0043005|GO:0005516|GO:0005737|GO:0000146|GO:0000166|GO:0006810|GO:0003779|GO:0016459|GO:0005524|GO:0001726|GO:0030426	NM_000259	Hs.21213
A_32_P79190	0.00130626	-1.58512	-0.664592	1.58512	down	1.47896	0.564588	1.47896	up	2.34434	1.22918	2.34434	up	398.155	444.21	784.743	850.112	857.807	978.939	662.329	399.304	541.176	-0.251819	0	0.362258	0.583048	0.672049	0.849118	-0.70595	-0.482698	-0.394676			143392631	chr1	143392572	+	FALSE	hs|1q21.1		XR_110942		chr1:143392572-143392631		XR_110942	Hs.730425
A_24_P216505	0.00916873	2.51678	1.33158	2.51678	up	-3.24289	-1.69728	3.24289	down	-8.16163	-3.02886	8.16163	down	18.3553	16.528	30.5494	24.3736	26.0235	12.2134	177.144	14.5221	22.1086	0.207393	0	-0.283719	-1.81585	-0.849193	-1.40602	0.252263	2.53179	2.23146			64082273	chr11	64082214	-	FALSE	hs|11q13.1				chr11:064082273-064082214
A_23_P16798	0.00252413	-1.69429	-0.760681	1.69429	down	2.10998	1.07723	2.10998	up	3.57491	1.83791	3.57491	up	59.581	64.1629	133.437	120.923	135.958	142.626	119.564	42.8431	48.5104	0	-0.558683	0.442009	0.663605	0.780335	0.72143	-0.887446	-1.56084	-0.900071	PFN4	Homo sapiens profilin family, member 4 (PFN4), mRNA [NM_199346]	24344150	chr2	24344091	-	FALSE	hs|2p23.3	375189	NM_199346	profilin family, member 4	chr2:24344150-24344091	GO:0005737|GO:0030036|GO:0003779|GO:0015629	NM_199346	Hs.442718
A_23_P107735	0.00787247	-1.15856	-0.212331	1.15856	down	1.5503	0.63255	1.5503	up	1.79612	0.84488	1.79612	up	974.201	1170.65	2267.12	2287.95	2363.31	2113.73	1187.3	792.447	1010.34	-0.0811663	0.233306	0	0.185323	0.250593	0.353215	-0.506385	-0.944873	-0.294251	CD79A	Homo sapiens CD79a molecule, immunoglobulin-associated alpha (CD79A), transcript variant 1, mRNA [NM_001783]	42385415	chr19	42385356	+	FALSE	hs|19q13.2	973	NM_001783	CD79a molecule, immunoglobulin-associated alpha	chr19:42385356-42385415	GO:0050853|GO:0042113|GO:0019815|GO:0005886|GO:0042100|GO:0005771|GO:0030183|GO:0045121|GO:0016021|GO:0009897|GO:0007166|GO:0004888	NM_001783	Hs.631567
A_23_P153958	0.00187493	1.51916	0.603274	1.51916	up	-2.49455	-1.31878	2.49455	down	-3.78963	-1.92206	3.78963	down	83.2419	124.426	155.789	140.93	118.379	163.969	219.05	95.6305	110.477	0.68172	-0.0875418	0	-0.314769	-0.450456	-0.450419	2.04852	1.14054	1.36146	INHBB	Homo sapiens inhibin, beta B (INHBB), mRNA [NM_002193]	121109171	chr2	121109112	+	FALSE	hs|2q14.2	3625	NM_002193	inhibin, beta B	chr2:121109112-121109171	GO:0005515|GO:0048471|GO:0048599|GO:0030154|GO:0042803|GO:0001541|GO:0071397|GO:0044320|GO:0045444|GO:0046676|GO:0009267|GO:0032869|GO:0046882|GO:0006952|GO:0005576|GO:0042981|GO:0046881|GO:0032924|GO:0005125|GO:0009605|GO:0005179|GO:0046789|GO:0048178|GO:0040007|GO:0008083|GO:0060279	NM_002193	Hs.1735
A_23_P253963	0.000894367	1.02119	0.0302445	1.02119	up	-1.32369	-0.404562	1.32369	down	-1.35173	-0.434806	1.35173	down	2307.6	1981.69	3281.86	2431.16	2707.87	3996.23	3476.28	2439.18	2956.7	-0.137466	0.0218858	0	-0.0296174	-0.163704	-0.0129929	0.43916	0.305971	0.352973	TMEM70	Homo sapiens transmembrane protein 70 (TMEM70), nuclear gene encoding mitochondrial protein, transcript variant 2, mRNA [NM_001040613]	74893799	chr8	74893740	+	FALSE	hs|8q21.11	54968	NM_001040613	transmembrane protein 70	chr8:74893740-74893799	GO:0005739|GO:0003674|GO:0033615|GO:0016020|GO:0032592|GO:0005743|GO:0016021	NM_001040613	Hs.106650
A_23_P151679	0.00397015	-1.00142	-0.00204601	1.00142	down	1.44911	0.535166	1.44911	up	1.45117	0.537212	1.45117	up	1633.43	2148.4	3305.47	2977.18	2681.03	2647.56	2465.01	1208.66	1664.33	-0.0887747	0.10521	0.134233	0	0.105524	0.0512828	-0.337988	-0.701273	-0.415569	PPM1A	Homo sapiens protein phosphatase, Mg2+/Mn2+ dependent, 1A (PPM1A), transcript variant 1, mRNA [NM_021003]	60759840	chr14	60759781	+	FALSE	hs|14q23.1	5494	NM_021003	protein phosphatase, Mg2+/Mn2+ dependent, 1A	chr14:60759781-60759840	GO:0008286|GO:0005515|GO:0043005|GO:0008287|GO:0030145|GO:0000287|GO:0030177|GO:0005624|GO:0005634|GO:0005575|GO:0008022|GO:0005891|GO:0005829|GO:0007165|GO:0006470|GO:0016787|GO:0016311|GO:0007050|GO:0004722|GO:0004871|GO:0045893|GO:0043123|GO:0016055	NM_021003	Hs.130036
A_24_P740857	0.00073456	1.10651	0.146014	1.10651	up	1.23737	0.307281	1.23737	up	1.11827	0.161266	1.11827	up	3509.37	5843.44	8517.1	7383.85	7277.95	5951.95	4175.7	3686.44	4270.35	0.102386	0.19661	0.100681	0.0292845	0	-0.0676499	-0.191732	-0.201398	-0.129035		Homo sapiens mRNA; cDNA DKFZp434A0326 (from clone DKFZp434A0326). [AL137354]	64790493	chr12	64790434	+	FALSE	hs|12q14.2		AL137354		chr12:64790434-64790493			Hs.569174
A_23_P57059	0.00506391	1.11643	0.158888	1.11643	up	1.15403	0.206677	1.15403	up	1.03368	0.0477893	1.03368	up	4609.23	4869.23	6597.23	5645.86	5520.7	7876.86	5479.58	4213.13	5459.63	0.186098	0.11159	0.0967321	0	-0.0913687	0.0091266	-0.025838	-0.0913725	-0.1084	STAU1	Homo sapiens staufen, RNA binding protein, homolog 1 (Drosophila) (STAU1), transcript variant T3, mRNA [NM_017453]	47730324	chr20	47730265	-	FALSE	hs|20q13.13	6780	NM_017453	staufen, RNA binding protein, homolog 1 (Drosophila)	chr20:47730324-47730265	GO:0005791|GO:0005622|GO:0005515|GO:0003725|GO:0005737|GO:0008298|GO:0010494|GO:0030529|GO:0005875	NM_017453	Hs.596704
A_23_P133120	0.00308519	2.79924	1.48504	2.79924	up	-1.96603	-0.975282	1.96603	down	-5.50338	-2.46032	5.50338	down	26.8961	29.7821	34.0855	24.1227	21.0351	16.2717	473.348	34.8582	40.9932	0	1.14576	-0.367879	-1.1026	-1.43035	-1.14428	1.55442	0.844824	1.30448	TMEM144	Homo sapiens transmembrane protein 144 (TMEM144), mRNA [NM_018342]	159175080	chr4	159175021	+	FALSE	hs|4q32.1	55314	NM_018342	transmembrane protein 144	chr4:159175021-159175080	GO:0016020|GO:0016021	NM_018342	Hs.176227
A_24_P416346	0.00253365	-1.31663	-0.396849	1.31663	down	1.62088	0.696776	1.62088	up	2.1341	1.09363	2.1341	up	116.873	156.865	284.493	132.727	277.961	252.734	125.665	140.651	101.2	0	-0.101213	0.423806	0.219612	0.663806	0.629722	-0.612913	-0.499786	-0.655038	ETV4	Homo sapiens ets variant 4 (ETV4), transcript variant 2, mRNA [NM_001079675]	41606025	chr17	41605966	-	FALSE	hs|17q21.31	2118	NM_001079675	ets variant 4	chr17:41606025-41605966	GO:0043565|GO:0006355|GO:0003700|GO:0005730|GO:0005634|GO:0045893	NM_001079675	Hs.434059
A_23_P171150	0.00616242	1.65006	0.722522	1.65006	up	-3.15507	-1.65767	3.15507	down	-5.20606	-2.38019	5.20606	down	22.1218	23.7145	33.3705	22.0801	28.7294	22.2972	329.202	19.9568	20.7585	0.315564	-0.185164	0	-1.04624	-0.272024	-0.718898	1.00421	1.39881	2.7004	KLHL4	Homo sapiens kelch-like 4 (Drosophila) (KLHL4), transcript variant 2, mRNA [NM_057162]	86890652	chrX	86890593	+	FALSE	hs|Xq21.31	56062	NM_057162	kelch-like 4 (Drosophila)	chrX:86890593-86890652	GO:0008150|GO:0003674|GO:0005737|GO:0015630|GO:0005730|GO:0005634|GO:0003779|GO:0043231	NM_057162	Hs.49075
A_24_P335759	0.00480633	1.17629	0.234247	1.17629	up	-4.15095	-2.05344	4.15095	down	-4.88273	-2.28769	4.88273	down	34.0714	20.2524	17.8957	22.3713	19.1734	19.5217	872.15	22.5548	28.5799	-0.347685	0.353502	-1.20564	-0.885994	0	-1.01658	1.53414	1.51699	1.90937	MYO15A	Homo sapiens myosin XVA (MYO15A), mRNA [NM_016239]	18082386	chr17	18082327	+	FALSE	hs|17p11.2	51168	NM_016239	myosin XVA	chr17:18082327-18082386	GO:0005515|GO:0005516|GO:0042472|GO:0007605|GO:0032420|GO:0003779|GO:0042995|GO:0016459|GO:0005524|GO:0003774|GO:0005737|GO:0000166|GO:0007626|GO:0005856	NM_016239	Hs.462390
A_24_P137434	0.000196788	-2.40249	-1.26453	2.40249	down	-1.1662	-0.221811	1.1662	down	2.06011	1.04272	2.06011	up	1876.01	2153.32	3037.85	3261.31	3710.2	5049.32	2217.95	1783.09	2115.18	-0.108266	-0.434033	-0.0784398	1.07668	1.21057	0.885608	-0.114477	0.159171	0	DCBLD2	Homo sapiens discoidin, CUB and LCCL domain containing 2 (DCBLD2), mRNA [NM_080927]	98515261	chr3	98515202	-	FALSE	hs|3q12.1	131566	NM_080927	discoidin, CUB and LCCL domain containing 2	chr3:98515261-98515202	GO:0030308|GO:0016020|GO:0009986|GO:0005887|GO:0042060|GO:0007155|GO:0030522	NM_080927	Hs.203691
A_23_P89431	7.58425e-06	-10.0572	-3.33015	10.0572	down	1.39404	0.479268	1.39404	up	14.02	3.80942	14.02	up	456.052	555.322	889.934	2162.99	2392.32	2620.25	738.486	435.077	566.728	0	-0.19663	0.443573	3.29927	3.41607	3.52205	-0.391709	-0.772214	-0.026938	CCL2	Homo sapiens chemokine (C-C motif) ligand 2 (CCL2), mRNA [NM_002982]	32584109	chr17	32584050	+	FALSE	hs|17q12	6347	NM_002982	chemokine (C-C motif) ligand 2	chr17:32584050-32584109	GO:0005515|GO:0035684|GO:0019221|GO:0005615|GO:0019079|GO:0009617|GO:0006954|GO:0006935|GO:0006959|GO:0071356|GO:0031727|GO:0009887|GO:0004871|GO:0007155|GO:0008009|GO:0019725|GO:0005102|GO:0043277|GO:0006916|GO:0005576|GO:0001525|GO:0007259|GO:0043615|GO:0002548|GO:0007165|GO:0071222|GO:0004672|GO:0071346|GO:0007186|GO:0007187|GO:0050870|GO:0071347|GO:0006468|GO:0048246|GO:0051770|GO:0007166	NM_002982	Hs.303649
A_24_P513262	0.00183688	1.06557	0.0916234	1.06557	up	1.82057	0.864392	1.82057	up	1.70854	0.772768	1.70854	up	224.396	250.943	336.596	430.482	335.03	380.969	447.553	177.179	291.644	-0.156712	0.434864	0.140163	0.0466904	0	0.0967545	-0.727555	-0.791161	-0.656144		Homo sapiens cDNA: FLJ22832 fis, clone KAIA4195. [AK026485]	119646933	chr4	119646874	-	FALSE	hs|4q26		AK026485		chr4:119646933-119646874			Hs.662234
A_23_P79628	0.00597157	1.15649	0.209752	1.15649	up	1.47139	0.557182	1.47139	up	1.27229	0.34743	1.27229	up	701.309	636.09	1080.07	879.194	926.225	979.992	803.688	506.923	667.434	0.301739	0.243681	0.0435878	-0.0706721	0.0304232	0	-0.562481	-0.293666	-0.226393	PSME4	Homo sapiens proteasome (prosome, macropain) activator subunit 4 (PSME4), mRNA [NM_014614]	54092618	chr2	54092559	-	FALSE	hs|2p16.2	23198	NM_014614	proteasome (prosome, macropain) activator subunit 4	chr2:54092618-54092559	GO:0000502|GO:0016070|GO:0016071|GO:0006521|GO:0051437|GO:0006915|GO:0042981|GO:0000216|GO:0005634|GO:0007275|GO:0007283|GO:0031145|GO:0051439|GO:0030154|GO:0000084|GO:0034641|GO:0016607|GO:0005488|GO:0000075|GO:0016032|GO:0000278|GO:0006977	NM_014614	Hs.413801
A_32_P48134	0.00766501	1.72844	0.789471	1.72844	up	-3.23814	-1.69516	3.23814	down	-5.59693	-2.48464	5.59693	down	38.5397	24.5693	25.1356	29.6472	23.1978	24.3059	990.466	22.6514	35.191	0	0.315303	-1.31527	-0.723919	-1.14912	-1.49535	1.98322	1.02751	1.07479	TPTE2P3	Homo sapiens transmembrane phosphoinositide 3-phosphatase and tensin homolog 2 pseudogene 3 (TPTE2P3), non-coding RNA [NR_002793]	53151206	chr13	53147523	+	FALSE	hs|13q14.3	220115	NR_002793	transmembrane phosphoinositide 3-phosphatase and tensin homolog 2 pseudogene 3	chr13:53147523-53151206		NR_002793	Hs.528448
A_24_P896765	0.00656575	2.25288	1.17177	2.25288	up	-3.66273	-1.87292	3.66273	down	-8.2517	-3.04469	8.2517	down	115.343	136.252	161.004	183.164	146.768	179.241	281.384	114.004	172.289	0.488068	0	-1.81514	-1.43775	-1.63033	-1.7743	1.75634	1.04608	1.48927			101433306	chr14	101433247	+	FALSE	hs|14q32.31				chr14:101433247-101433306
A_23_P119390	0.00735843	1.24811	0.319744	1.24811	up	-1.91513	-0.937442	1.91513	down	-2.39029	-1.25719	2.39029	down	41.3479	50.7602	81.4134	52.8875	73.9332	66.0657	173.091	52.4343	62.7284	0.183602	-0.320769	-0.172063	-0.637467	0	-0.630998	1.17873	0.524092	0.800273	EHD2	Homo sapiens EH-domain containing 2 (EHD2), mRNA [NM_014601]	48244165	chr19	48239759	+	FALSE	hs|19q13.33	30846	NM_014601	EH-domain containing 2	chr19:48239759-48244165	GO:0005515|GO:0005886|GO:0032456|GO:0019904|GO:0005509|GO:0003924|GO:0005624|GO:0005634|GO:0003676|GO:0005525|GO:0005524|GO:0006897|GO:0016787|GO:0000166|GO:0030866|GO:0007596|GO:0055038|GO:0010008|GO:0005768	NM_014601	Hs.631554
A_23_P139912	0.00584398	-1.75613	-0.812396	1.75613	down	1.47392	0.559656	1.47392	up	2.58838	1.37205	2.58838	up	233.353	427.269	504.659	505.582	624.479	553.315	414.484	283.008	274.481	0	0.712244	-0.0540051	0.732706	1.13651	1.22621	-0.0538783	-0.497294	-0.469556	IGFBP6	Homo sapiens insulin-like growth factor binding protein 6 (IGFBP6), mRNA [NM_002178]	53494912	chr12	53494853	+	FALSE	hs|12q13.13	3489	NM_002178	insulin-like growth factor binding protein 6	chr12:53494853-53494912	GO:0007165|GO:0005737|GO:0008285|GO:0005794|GO:0031994|GO:0005576|GO:0005615|GO:0001558	NM_002178	Hs.274313
A_32_P10403	0.00680345	-3.18232	-1.67008	3.18232	down	-1.4874	-0.572796	1.4874	down	2.13951	1.09728	2.13951	up	27.8319	22.3444	29.8505	76.8704	67.4575	60.3332	98.0199	24.0578	41.1676	0	-0.305272	-1.24116	1.30984	0.977496	1.17647	0.334007	-0.0425557	-0.11949	SERPINE1	UI-H-FH1-bfk-o-16-0-UI.s1 NCI_CGAP_FH1 Homo sapiens cDNA clone UI-H-FH1-bfk-o-16-0-UI 3', mRNA sequence [BU618641]	100782337	chr7	100782278	-	FALSE	hs|7q22.1	5054	BU618641	serpin peptidase inhibitor, clade E (nexin, plasminogen activator inhibitor type 1), member 1	chr7:100782337-100782278	GO:0033629|GO:0005515|GO:0043627|GO:0035491|GO:0010469|GO:0005886|GO:0004867|GO:2000098|GO:0042246|GO:0002020|GO:0005615|GO:0014912|GO:0032757|GO:0061044|GO:0071258|GO:0061045|GO:0031093|GO:0034097|GO:0043066|GO:0030336|GO:0005102|GO:0051918|GO:0030168|GO:0051384|GO:0005625|GO:0005576|GO:0070887|GO:0042593|GO:0001525|GO:0030414|GO:0045766|GO:0010951|GO:0031012|GO:0050829|GO:0071222|GO:0007596|GO:…		Hs.713079
A_23_P207371	0.00478441	3.17351	1.66608	3.17351	up	-1.26403	-0.338027	1.26403	down	-4.0114	-2.00411	4.0114	down	29.7302	32.2294	46.7676	33.752	28.6627	33.967	56.3323	27.9288	36.9949	0.791193	0.0153484	-0.171157	-1.06778	-1.44676	-1.84832	0	0.579267	1.0702	G6PC	Homo sapiens glucose-6-phosphatase, catalytic subunit (G6PC), mRNA [NM_000151]	41063820	chr17	41063762	+	FALSE	hs|17q21.31	2538	NM_000151	glucose-6-phosphatase, catalytic subunit	chr17:41063762-41063820	GO:0010468|GO:0005783|GO:0006094|GO:0015760|GO:0030176|GO:0046415|GO:0008645|GO:0015758|GO:0035264|GO:0016773|GO:0051156|GO:0008202|GO:0042632|GO:0005792|GO:0005975|GO:0005977|GO:0042593|GO:0055085|GO:0016020|GO:0016787|GO:0004346|GO:0042301|GO:0005789|GO:0006641|GO:0016021|GO:0005980	NM_000151	Hs.212293
A_24_P306094	0.00982856	-1.00682	-0.00980049	1.00682	down	1.63152	0.706219	1.63152	up	1.64264	0.716019	1.64264	up	206.163	214.295	324.337	366.623	285.381	364.848	383.649	166.011	244.388	0.0327763	-0.226667	0.300065	0	0.024148	0.111427	-0.934448	-0.652791	-0.425244	YLPM1	Homo sapiens (clone zap3) mRNA, 3' end of cds. [L40403]	75288763	chr14	75288704	+	FALSE	hs|14q24.3	56252	L40403	YLP motif containing 1	chr14:75288704-75288763	GO:0008150|GO:0003674|GO:0006355|GO:0016607|GO:0005634		Hs.531111
A_23_P142533	0.00166294	-6.11074	-2.61135	6.11074	down	-1.25393	-0.32646	1.25393	down	4.87326	2.28489	4.87326	up	61.4798	82.3988	149.044	165.879	322.549	320.323	132.607	73.5657	77.6937	-1.38365	-0.89847	0	1.63822	2.24512	1.66859	0.0173778	-0.891255	-0.428864	COL3A1	Homo sapiens collagen, type III, alpha 1 (COL3A1), mRNA [NM_000090]	189875412	chr2	189875071	+	FALSE	hs|2q32.2	1281	NM_000090	collagen, type III, alpha 1	chr2:189875071-189875412	GO:0005515|GO:0005581|GO:0005586|GO:0005615|GO:0007507|GO:0007411|GO:0030199|GO:0007179|GO:0043206|GO:0034097|GO:0009314|GO:0048407|GO:0030168|GO:0005576|GO:0031012|GO:0001501|GO:0005178|GO:0018149|GO:0007160|GO:0050777|GO:0007229|GO:0042060|GO:0043588|GO:0032964|GO:0005201	NM_000090	Hs.443625
A_23_P169576	0.00332142	1.01747	0.0249812	1.01747	up	1.40514	0.490716	1.40514	up	1.38102	0.465735	1.38102	up	980.621	1057.73	1529.01	1475.94	1218.16	1714.95	1750.49	790.684	972.273	0	-0.0786086	0.226906	0.000759065	0.0524502	0.0201446	-0.343147	-0.405995	-0.574709	EXOC6	Homo sapiens exocyst complex component 6 (EXOC6), transcript variant 1, mRNA [NM_019053]	94819165	chr10	94819106	+	FALSE	hs|10q23.33	54536	NM_019053	exocyst complex component 6	chr10:94819106-94819165	GO:0000145|GO:0015031|GO:0006904	NM_019053	Hs.655657
A_23_P435610	0.00745034	1.12243	0.166625	1.12243	up	1.55681	0.638596	1.55681	up	1.387	0.47197	1.387	up	381.875	419.291	635.128	472.846	557.07	620.233	491.988	311.401	353.458	0.107024	0.408553	0.0118238	-0.0218315	0.0493565	0	-0.680784	-0.359009	-0.348594	KIAA0090	Homo sapiens KIAA0090 (KIAA0090), mRNA [NM_015047]	19545114	chr1	19545055	-	FALSE	hs|1p36.13	23065	NM_015047	KIAA0090	chr1:19545114-19545055	GO:0005515|GO:0016020|GO:0016021	NM_015047	Hs.439200
A_23_P137007	8.0729e-05	-2.75138	-1.46015	2.75138	down	1.11232	0.153569	1.11232	up	3.06041	1.61372	3.06041	up	306.769	490.642	684.112	645.626	739.147	847.895	553.664	331.566	396.29	-0.503548	0	0.034202	1.20687	1.30874	1.3955	-0.214132	-0.325698	-0.390222	MAGEA10	Homo sapiens melanoma antigen family A, 10 (MAGEA10), transcript variant 1, mRNA [NM_001011543]	151303193	chrX	151303134	-	FALSE	hs|Xq28	4109	NM_001011543	melanoma antigen family A, 10	chrX:151303193-151303134		NM_001011543	Hs.18048
A_24_P173823	0.00401169	1.07553	0.105045	1.07553	up	1.64311	0.71643	1.64311	up	1.52772	0.611385	1.52772	up	935.305	964.966	1451.5	1248.73	1109.57	1602.87	1287.95	757.225	940.185	0.0961229	0	0.341753	-0.0165547	0.123535	0.0157605	-0.82248	-0.416957	-0.471976	PBX1	Homo sapiens pre-B-cell leukemia homeobox 1 (PBX1), transcript variant 1, mRNA [NM_002585]	164821035	chr1	164820976	+	FALSE	hs|1q23.3	5087	NM_002585	pre-B-cell leukemia homeobox 1	chr1:164820976-164821035	GO:0005515|GO:0006694|GO:0001658|GO:0008284|GO:0003700|GO:0030325|GO:0001655|GO:0048706|GO:0048538|GO:0005634|GO:0009954|GO:0030326|GO:0048536|GO:0009952|GO:0030154|GO:0043433|GO:0005737|GO:0030278|GO:0045944|GO:0009887|GO:0007548|GO:0035162|GO:0005667|GO:0006355|GO:0046982|GO:0005730|GO:0003677|GO:0006351|GO:0043565|GO:0008134	NM_002585	Hs.557097
A_32_P206839	0.00520743	-2.69203	-1.4287	2.69203	down	-1.42145	-0.507365	1.42145	down	1.89386	0.921331	1.89386	up	208.845	228.613	348.707	354.781	329.802	410.462	365.569	214.701	238.395	-0.785779	-0.405782	-0.282838	0.631862	1.05982	1.12	0	0.459957	-0.412261	LOC100288911	Homo sapiens hypothetical LOC100288911 (LOC100288911), non-coding RNA [NR_037631]	36581977	chr2	36581918	-	FALSE	hs|2p22.3	100288911	NR_037631	hypothetical LOC100288911	chr2:36581977-36581918		NR_037631	Hs.432924
A_23_P90099	0.00831804	-1.12449	-0.169267	1.12449	down	1.19287	0.254442	1.19287	up	1.34137	0.423709	1.34137	up	5071.63	6763.91	8936.69	9405.43	8525.24	8410.55	5427.93	5023.47	5757.62	-0.0910062	0	0.11414	0.134073	0.171997	0.224864	-0.31227	-0.351103	-0.0768184	TMEM205	Homo sapiens transmembrane protein 205 (TMEM205), transcript variant 1, mRNA [NM_198536]	11453529	chr19	11453470	-	FALSE	hs|19p13.2	374882	NM_198536	transmembrane protein 205	chr19:11453529-11453470	GO:0016020|GO:0016021	NM_198536	Hs.8036
A_24_P927142	0.000270482	2.41533	1.27222	2.41533	up	-1.41422	-0.500011	1.41422	down	-3.41582	-1.77223	3.41582	down	26.6793	20.4982	33.0563	39.3192	34.3088	15.6243	214.836	30.6426	46.709	-0.435015	0	0.120852	-1.60723	-1.05634	-1.46725	0.363888	0.48157	0.340411			28837364	chr1	28837305	-	FALSE	hs|1p35.3				chr1:028837364-028837305
A_32_P115421	0.000713777	1.02114	0.030187	1.02114	up	-1.96201	-0.972333	1.96201	down	-2.0035	-1.00252	2.0035	down	33.606	21.6352	51.0097	54.1901	41.2917	26.1049	496.935	16.3578	28.3907	0.00859794	-0.375018	0	-0.101395	-0.104123	-0.251463	1.04431	0.863324	0.642945			27405686	chr8	27405627	-	FALSE	hs|8p21.1				chr8:027405686-027405627
A_23_P143068	0.00287232	1.15716	0.210588	1.15716	up	-1.65544	-0.727212	1.65544	down	-1.9156	-0.937799	1.9156	down	54.0459	62.4521	74.8484	73.619	68.4694	76.1416	131.605	52.4256	65.5909	0.47582	-0.0329838	-0.0502577	-0.176473	-0.0627127	0	0.775509	0.765498	1.03321	IQCA1	Homo sapiens IQ motif containing with AAA domain 1 (IQCA1), mRNA [NM_024726]	237349763	chr2	237349704	-	FALSE	hs|2q37.3	79781	NM_024726	IQ motif containing with AAA domain 1	chr2:237349763-237349704	GO:0000166|GO:0005524	NM_024726	Hs.591594
A_23_P30223	0.00579563	1.2264	0.294432	1.2264	up	1.53594	0.619121	1.53594	up	1.25239	0.324689	1.25239	up	188.376	179.271	252.173	188.138	205.658	295.699	266.507	157.83	186.446	0.2143	0.108246	0.400719	-0.199459	0	0.0394274	-0.453461	-0.197473	-0.483163	SRD5A1	Homo sapiens steroid-5-alpha-reductase, alpha polypeptide 1 (3-oxo-5 alpha-steroid delta 4-dehydrogenase alpha 1) (SRD5A1), mRNA [NM_001047]	6668752	chr5	6668693	+	FALSE	hs|5p15.31	6715	NM_001047	steroid-5-alpha-reductase, alpha polypeptide 1 (3-oxo-5 alpha-steroid delta 4-dehydrogenase alpha 1)	chr5:6668693-6668752	GO:0033218|GO:0006702|GO:0001655|GO:0016627|GO:0070402|GO:0030154|GO:0021794|GO:0030539|GO:0042747|GO:0071394|GO:0060992|GO:0071392|GO:0043025|GO:0007548|GO:0032354|GO:0005792|GO:0032869|GO:0014850|GO:0001889|GO:0060348|GO:0071872|GO:0042448|GO:0005789|GO:0016101|GO:0042446|GO:0030540|GO:0003865|GO:0048471|GO:0021987|GO:0021510|GO:0005783|GO:0021983|GO:0007530|GO:0070852|GO:0005737|GO:0043209|GO:…	NM_001047	Hs.552
A_32_P180265	0.00387334	-1.61312	-0.689853	1.61312	down	1.42063	0.506526	1.42063	up	2.29164	1.19638	2.29164	up	101.255	140.682	180.17	208.348	194.522	190.402	192.871	120.05	128.856	-0.36294	0	0.187313	0.431901	0.756921	0.70511	-0.897659	-0.299572	-0.497973	LOC100506845	PREDICTED: Homo sapiens hypothetical LOC100506845 (LOC100506845), partial miscRNA [XR_110608]	67786680	chr9	67786621	+	FALSE	hs|9q13	100506845	XR_110608	hypothetical LOC100506845	chr9:67786621-67786680		XR_110608
A_23_P57709	0.000490471	-3.26773	-1.70829	3.26773	down	1.29663	0.374766	1.29663	up	4.23704	2.08306	4.23704	up	481.312	775.819	898.789	832.56	855.444	1007.37	767.974	490.527	573.547	-0.683469	0.0893636	0	1.36781	1.5651	1.59786	-0.873773	-0.188808	-0.655822	PCOLCE2	Homo sapiens procollagen C-endopeptidase enhancer 2 (PCOLCE2), mRNA [NM_013363]	142536972	chr3	142536913	-	FALSE	hs|3q23	26577	NM_013363	procollagen C-endopeptidase enhancer 2	chr3:142536972-142536913	GO:0016504|GO:0010952|GO:0005518|GO:0005576|GO:0008201	NM_013363	Hs.8944
A_23_P213620	0.00813054	-1.20737	-0.271864	1.20737	down	2.1246	1.08719	2.1246	up	2.56517	1.35905	2.56517	up	447.321	658.74	1243.81	1093.91	1082.41	1006.28	480.367	216.341	351.129	-0.235072	0	0.351003	0.354163	0.3989	0.178462	-1.59264	-1.03707	-0.51593	PPP2R2B	Homo sapiens protein phosphatase 2, regulatory subunit B, beta (PPP2R2B), transcript variant 1, mRNA [NM_004576]	145969231	chr5	145969172	-	FALSE	hs|5q32	5521	NM_004576	protein phosphatase 2, regulatory subunit B, beta	chr5:145969231-145969172	GO:0005739|GO:0005515|GO:0008219|GO:0007165|GO:0005737|GO:0016020|GO:0008601|GO:0006915|GO:0000159|GO:0005741|GO:0005856	NM_004576	Hs.655213
A_24_P261259	0.00424062	1.51601	0.600275	1.51601	up	1.24967	0.321543	1.24967	up	-1.21313	-0.278732	1.21313	down	954.059	1095.05	1395.28	803.803	954.084	1442.43	1136.03	774.563	1008.1	0.320746	0.460096	0.167197	-0.320009	-0.326513	-0.206264	-0.170215	0	0.153625	PFKFB3	Homo sapiens 6-phosphofructo-2-kinase/fructose-2,6-biphosphatase 3 (PFKFB3), transcript variant 1, mRNA [NM_004566]	6277121	chr10	6277062	+	FALSE	hs|10p15.1	5209	NM_004566	6-phosphofructo-2-kinase/fructose-2,6-biphosphatase 3	chr10:6277062-6277121	GO:0005515|GO:0005975|GO:0003824|GO:0005524|GO:0006096|GO:0042802|GO:0005829|GO:0016787|GO:0000166|GO:0004331|GO:0016301|GO:0006006|GO:0006003|GO:0003873|GO:0016740	NM_004566	Hs.195471
A_24_P161317	0.00396155	1.24529	0.31648	1.24529	up	1.54685	0.629335	1.54685	up	1.24216	0.312856	1.24216	up	582.299	756.505	2003.62	1556.88	1741.33	1583.91	755.953	406.43	629.163	0.40343	0.290792	0.167236	0.107531	0	-0.195511	-0.468988	-0.19993	-0.357629			1772147	chr3	1772086	+	FALSE	hs|3p26.3				chr3:001772086-001772147
A_23_P136196	0.00767804	-1.00114	-0.0016486	1.00114	down	1.51266	0.597088	1.51266	up	1.51439	0.598737	1.51439	up	322.002	249.532	451.419	371.587	348.991	553.016	629.506	214.217	306.496	0.0163265	-0.109707	0.336522	0	0.201204	0.0468836	-0.393647	-0.689585	-0.464892	TBC1D19	Homo sapiens TBC1 domain family, member 19 (TBC1D19), mRNA [NM_018317]	26756641	chr4	26756582	+	FALSE	hs|4p15.2	55296	NM_018317	TBC1 domain family, member 19	chr4:26756582-26756641	GO:0005622|GO:0005097|GO:0005096	NM_018317	Hs.479403
A_23_P153510	0.00721328	1.18492	0.244787	1.18492	up	1.94698	0.961237	1.94698	up	1.64313	0.71645	1.64313	up	120.727	251.231	303.862	193.829	255.143	239.688	171.144	113.941	121.419	0	0.588452	0.202721	-0.0894142	0.0537246	0.0925016	-0.764915	-0.941902	-0.385722	MED25	Homo sapiens mediator complex subunit 25 (MED25), mRNA [NM_030973]	50335656	chr19	50335597	+	FALSE	hs|19q13.33	81857	NM_030973	mediator complex subunit 25	chr19:50335597-50335656	GO:0010467|GO:0006355|GO:0005654|GO:0005634	NM_030973	Hs.656639
A_24_P281975	0.00253764	-1.31246	-0.392273	1.31246	down	1.44505	0.531117	1.44505	up	1.89657	0.923389	1.89657	up	1093.08	1047.84	1634.65	1316.65	1371.85	2135.51	1424.53	984.043	1196.79	-0.274226	0	0.321271	0.399469	0.380353	0.444041	-0.587935	-0.568144	-0.390225	GNPTAB	Homo sapiens N-acetylglucosamine-1-phosphate transferase, alpha and beta subunits (GNPTAB), mRNA [NM_024312]	102139417	chr12	102139358	-	FALSE	hs|12q23.2	79158	NM_024312	N-acetylglucosamine-1-phosphate transferase, alpha and beta subunits	chr12:102139417-102139358	GO:0009306|GO:0005794|GO:0016020|GO:0003976|GO:0000139|GO:0046835|GO:0005634|GO:0016021|GO:0046872|GO:0030154|GO:0016772|GO:0008134	NM_024312	Hs.46850
A_24_P347480	0.00375649	-1.05555	-0.0779933	1.05555	down	1.28789	0.365004	1.28789	up	1.35943	0.442997	1.35943	up	2205.75	2304.97	3279.22	3092.63	2977.74	3822.06	2495.32	2012.01	2493.91	-0.168731	0	0.0434715	0.0436143	0.0463409	0.0187654	-0.555345	-0.371549	-0.293379	NEK9	Homo sapiens NIMA (never in mitosis gene a)- related kinase 9 (NEK9), mRNA [NM_033116]	75548984	chr14	75548925	-	FALSE	hs|14q24.3	91754	NM_033116	NIMA (never in mitosis gene a)- related kinase 9	chr14:75548984-75548925	GO:0005739|GO:0005515|GO:0007067|GO:0007049|GO:0005737|GO:0019901|GO:0000166|GO:0004674|GO:0005634|GO:0005524|GO:0046872|GO:0051301	NM_033116	Hs.730635
A_24_P932706	0.00172462	-1.00187	-0.00269781	1.00187	down	1.43522	0.521276	1.43522	up	1.43791	0.523974	1.43791	up	225.212	190.679	301.676	230.477	239.919	375.701	327.314	163.88	236.351	-0.128834	0.0478057	0.170427	0	0.0212474	0.0762444	-0.621941	-0.442761	-0.409728			48002932	chr7	48002873	-	FALSE	hs|7p12.3				chr7:048002932-048002873
A_23_P12272	0.00755601	-1.00424	-0.00609934	1.00424	down	1.68439	0.752226	1.68439	up	1.69153	0.758325	1.69153	up	1967.58	2171.57	3209.16	2740.12	2501.75	3382.03	2180.36	1820.15	1934.79	0	-0.000723869	0.275805	0.0347613	0.148247	0.110371	-0.864965	-0.276951	-0.839683	PPP1R8	Homo sapiens protein phosphatase 1, regulatory (inhibitor) subunit 8 (PPP1R8), transcript variant 2, mRNA [NM_138558]	28177988	chr1	28177929	+	FALSE	hs|1p35.3	5511	NM_138558	protein phosphatase 1, regulatory (inhibitor) subunit 8	chr1:28177929-28177988	GO:0008380|GO:0005515|GO:0006397|GO:0006355|GO:0008283|GO:0003723|GO:0004865|GO:0005730|GO:0005634|GO:0003677|GO:0006401|GO:0008599|GO:0005737|GO:0004519|GO:0016787|GO:0016607|GO:0005681|GO:0008995	NM_138558	Hs.533474
A_32_P14610	0.00533066	-1.16531	-0.220713	1.16531	down	1.26544	0.339634	1.26544	up	1.47462	0.560347	1.47462	up	901.682	1251.06	1644.59	1429.93	1437.97	1684.34	1308.71	796.827	959.881	0	-0.110151	0.00394821	0.238948	0.248711	0.0682782	-0.577819	-0.201112	-0.346174	PDLIM5	Homo sapiens PDZ and LIM domain 5 (PDLIM5), transcript variant 1, mRNA [NM_006457]	95589137	chr4	95589078	+	FALSE	hs|4q22.3	10611	NM_006457	PDZ and LIM domain 5	chr4:95589078-95589137	GO:0051963|GO:0030054|GO:0005886|GO:0042805|GO:0005624|GO:0014069|GO:0045202|GO:0003779|GO:0015629|GO:0046872|GO:0005829|GO:0005737|GO:0047485|GO:0045211|GO:0005080|GO:0008270|GO:0061001|GO:0019717	NM_006457	Hs.480311
A_24_P463891	0.00219555	-3.78424	-1.92	3.78424	down	1.06883	0.0960281	1.06883	up	4.0447	2.01603	4.0447	up	30.6164	23.2729	44.8921	66.1865	64.1853	131.711	324.952	23.4179	36.0667	-0.395837	-0.521428	0.72972	1.81369	2.17013	1.58865	-0.249401	0	-0.226228	FUT9	Homo sapiens fucosyltransferase 9 (alpha (1,3) fucosyltransferase) (FUT9), mRNA [NM_006581]	96663060	chr6	96663001	+	FALSE	hs|6q16.1	10690	NM_006581	fucosyltransferase 9 (alpha (1,3) fucosyltransferase)	chr6:96663001-96663060	GO:0046920|GO:0042355|GO:0005794|GO:0016020|GO:0016757|GO:0005975|GO:0032580|GO:0008417|GO:0006486|GO:0016021|GO:0007399	NM_006581	Hs.49117
A_24_P56270	0.00564907	1.06879	0.095974	1.06879	up	1.50514	0.589901	1.50514	up	1.40827	0.493927	1.40827	up	749.465	878.476	1279.82	866.34	926.719	1334.69	1072.29	582.818	561.654	-0.0546532	0.117817	0.25351	0	0.0173931	0.0113583	-0.409527	-0.329391	-0.714111	DYRK2	Homo sapiens dual-specificity tyrosine-(Y)-phosphorylation regulated kinase 2 (DYRK2), transcript variant 2, mRNA [NM_006482]	68056194	chr12	68056135	+	FALSE	hs|12q15	8445	NM_006482	dual-specificity tyrosine-(Y)-phosphorylation regulated kinase 2	chr12:68056135-68056194	GO:0000287|GO:0030145|GO:0045725|GO:0005730|GO:0006915|GO:0005634|GO:0005524|GO:0043231|GO:0007224|GO:0042771|GO:0005737|GO:0004672|GO:0000166|GO:0004674|GO:0006468|GO:0004713	NM_006482	Hs.173135
A_24_P372217	0.00657561	-1.0102	-0.014638	1.0102	down	1.27858	0.354547	1.27858	up	1.29162	0.369185	1.29162	up	415.066	444.103	577.948	529.067	489.119	794.143	758.702	317.573	427.536	0.0489504	0	0.106034	-0.0116643	0.194449	0.0161136	-0.2097	-0.257899	-0.441056	ERLIN2	Homo sapiens ER lipid raft associated 2 (ERLIN2), transcript variant 1, mRNA [NM_007175]	37614697	chr8	37614638	+	FALSE	hs|8p11.23	11160	NM_007175	ER lipid raft associated 2	chr8:37614638-37614697	GO:0005515|GO:0005737|GO:0005886|GO:0005783|GO:0005789|GO:0016021|GO:0030433	NM_007175	Hs.705490
A_23_P32328	0.00346067	-1.01374	-0.0196883	1.01374	down	1.18457	0.244359	1.18457	up	1.20084	0.264047	1.20084	up	3183.79	3923.25	5453.25	4320.67	4479.86	5388.99	3334.21	2896.51	3289.25	0	-0.0149766	0.0957192	0.0855387	0.0234317	0.0308369	-0.304496	-0.207492	-0.140347	LYRM4	Homo sapiens LYR motif containing 4 (LYRM4), transcript variant 1, mRNA [NM_020408]	5109509	chr6	5109450	-	FALSE	hs|6p25.1	57128	NM_020408	LYR motif containing 4	chr6:5109509-5109450	GO:0005739|GO:0005634	NM_020408	Hs.387755
A_23_P312415	0.00391082	-1.54183	-0.624642	1.54183	down	-2.43928	-1.28645	2.43928	down	-1.58207	-0.661812	1.58207	down	32.3026	33.4112	45.3927	42.3836	47.2048	37.3568	152.061	29.5252	35.0767	-0.591773	-0.690502	-0.682387	0	0.325287	-0.416022	0.590096	0.352588	0.952016	ADAMTSL1	Homo sapiens ADAMTS-like 1 (ADAMTSL1), transcript variant 2, mRNA [NM_052866]	18684830	chr9	18684771	+	FALSE	hs|9p22.1	92949	NM_052866	ADAMTS-like 1	chr9:18684771-18684830	GO:0005578|GO:0008270|GO:0008233|GO:0005576|GO:0008237	NM_052866	Hs.522019
A_23_P373017	0.000604927	-4.87984	-2.28683	4.87984	down	-1.41295	-0.498707	1.41295	down	3.45366	1.78813	3.45366	up	47.8323	54.8847	67.6075	120.097	177.566	171.783	105.33	42.6043	52.2829	-0.230928	-1.03608	-0.56241	1.36799	1.95025	1.71284	0.210225	-0.543523	0	CCL3	Homo sapiens mRNA for pLD78 peptide, complete cds. [D00044]	34415949	chr17	34415891	-	FALSE	hs|17q12	6348	D00044	chemokine (C-C motif) ligand 3	chr17:34415949-34415891	GO:0008009|GO:0007267|GO:0006874|GO:0045069|GO:0006928|GO:0005576|GO:0005625|GO:0006887|GO:0042056|GO:0005615|GO:0050918|GO:0007165|GO:0006955|GO:0006954|GO:0006935|GO:0007186|GO:0007010|GO:0004871		Hs.514107
A_24_P477353	0.000113549	1.10318	0.141675	1.10318	up	1.51884	0.602967	1.51884	up	1.37677	0.461293	1.37677	up	4904.22	7898.19	12361.7	12160.1	11822.8	8863.96	4904.73	4262.18	5112.12	0.093567	0.260635	0.0840884	-0.00535873	0	0.0186253	-0.411743	-0.4192	-0.539668			21252383	chr18	21252324	-	FALSE	hs|18q11.2				chr18:021252383-021252324
A_23_P23346	0.00338571	-1.00183	-0.00264454	1.00183	down	1.82007	0.863992	1.82007	up	1.82341	0.866636	1.82341	up	10172.7	10934.4	15935.4	14224.8	12394	16889.1	7838.21	5944.86	7360.67	-0.262232	0.32356	0.25719	0.23006	0	0.0963919	-0.854343	-0.804807	-0.614306	MLLT11	Homo sapiens myeloid/lymphoid or mixed-lineage leukemia (trithorax homolog, Drosophila); translocated to, 11 (MLLT11), mRNA [NM_006818]	151040817	chr1	151040758	+	FALSE	hs|1q21.3	10962	NM_006818	myeloid/lymphoid or mixed-lineage leukemia (trithorax homolog, Drosophila); translocated to, 11	chr1:151040758-151040817	GO:0003674|GO:0043065|GO:0051901|GO:0090200|GO:0005575|GO:0045893	NM_006818	Hs.75823
A_24_P324674	0.00740297	-1.2419	-0.312543	1.2419	down	-2.85376	-1.51286	2.85376	down	-2.29791	-1.20032	2.29791	down	35.1593	23.2822	38.4322	31.2328	39.6693	33.5598	976.784	30.6652	37.3692	-0.609379	0	-0.685794	-0.600684	-0.091308	0.334449	1.28809	0.711839	1.24348	LY9	Homo sapiens lymphocyte antigen 9 (LY9), transcript variant 1, mRNA [NM_002348]	160797604	chr1	160797545	+	FALSE	hs|1q23.3	4063	NM_002348	lymphocyte antigen 9	chr1:160797545-160797604	GO:0003674|GO:0016064|GO:0016020|GO:0016021|GO:0007155	NM_002348	Hs.403857
A_32_P68142	0.00973857	1.94974	0.963282	1.94974	up	-3.20404	-1.67989	3.20404	down	-6.24705	-2.64318	6.24705	down	28.0479	22.3695	22.4905	25.0055	29.6543	17.4807	342.589	31.7358	38.5129	0	0.31611	-1.68456	-1.10894	-1.94494	-1.20441	1.36302	0.876656	1.43156			84942867	chr16	84942808	-	FALSE	hs|16q24.1				chr16:084942867-084942808
A_23_P353524	0.00190764	-7.15342	-2.83863	7.15342	down	-1.17533	-0.23307	1.17533	down	6.08629	2.60556	6.08629	up	16.5497	9.12053	21.265	127.74	193.541	220.538	50.0867	13.3516	13.7826	-0.251347	0	-0.622306	2.66181	2.86231	2.11812	-0.977095	-0.0172843	0.819936	IVL	Homo sapiens involucrin (IVL), mRNA [NM_005547]	152884031	chr1	152883972	+	FALSE	hs|1q21.3	3713	NM_005547	involucrin	chr1:152883972-152884031	GO:0005737|GO:0018149|GO:0030216|GO:0010224|GO:0005198|GO:0031424|GO:0018153|GO:0030674|GO:0001533	NM_005547	Hs.516439
A_23_P68866	0.00266693	-1.08855	-0.12241	1.08855	down	1.29677	0.374923	1.29677	up	1.4116	0.497333	1.4116	up	20327.9	18183	26089.8	27167.3	23293.9	28884.3	21069.9	17221.3	20265.3	0	-0.0527858	0.230497	0.16618	0.148225	0.230536	-0.382831	-0.215143	-0.349084	UQCR10	Homo sapiens ubiquinol-cytochrome c reductase, complex III subunit X (UQCR10), nuclear gene encoding mitochondrial protein, transcript variant 2, mRNA [NM_001003684]	30165886	chr22	30165827	+	FALSE	hs|22q12.2	29796	NM_001003684	ubiquinol-cytochrome c reductase, complex III subunit X	chr22:30165827-30165886	GO:0022904|GO:0005739|GO:0008121|GO:0016020|GO:0006122|GO:0070469|GO:0006810|GO:0005743|GO:0005740	NM_001003684	Hs.284292
A_24_P272222	0.00247134	2.18541	1.1279	2.18541	up	-1.07167	-0.0998566	1.07167	down	-2.34203	-1.22776	2.34203	down	20.4558	14.0755	22.9069	24.8208	32.8329	12.3821	112.584	20.2218	25.3985	0	0.208984	0.192434	-1.20045	-1.07147	-0.710369	-0.0179371	0.0552511	0.663674	PLIN5	Homo sapiens perilipin 5 (PLIN5), mRNA [NM_001013706]	4534095	chr19	4534036	-	FALSE	hs|19p13.3	440503	NM_001013706	perilipin 5	chr19:4534095-4534036	GO:0005811	NM_001013706	Hs.131034
A_23_P303833	0.0011647	-1.01092	-0.0156672	1.01092	down	1.76683	0.821161	1.76683	up	1.78612	0.836828	1.78612	up	238.828	230.022	327.453	338.09	308.684	455.329	319.751	199.93	202.588	0.0985069	0	0.0265235	0.168742	-0.0517885	0.0550784	-0.848304	-0.49504	-0.995109	SCN4B	Homo sapiens sodium channel, voltage-gated, type IV, beta (SCN4B), transcript variant 1, mRNA [NM_174934]	118004356	chr11	118004297	-	FALSE	hs|11q23.3	6330	NM_174934	sodium channel, voltage-gated, type IV, beta	chr11:118004356-118004297	GO:0005244|GO:0005886|GO:0005248|GO:0001518|GO:0016021|GO:0006814|GO:0006811	NM_174934	Hs.65239
A_24_P943183	0.000510155	1.41813	0.503988	1.41813	up	-1.85344	-0.890209	1.85344	down	-2.62842	-1.3942	2.62842	down	27.0878	25.917	53.0405	56.7065	52.6292	42.8435	283.822	33.1487	44.6927	0	-0.0151735	0.113861	-0.22706	-0.594563	-0.591652	1.21281	0.6469	0.909599			117040025	chr1	117039966	+	FALSE	hs|1p13.1				chr1:117039966-117040025
A_32_P146701	0.00298276	1.37065	0.454864	1.37065	up	2.36944	1.24454	2.36944	up	1.72869	0.78968	1.72869	up	103.461	77.338	144.27	307.537	188.063	118.774	278.86	76.5732	136.769	0.435019	0.672249	0.378007	0	-0.25471	0.375393	-0.538514	-0.650331	-1.05951		Synthetic construct Homo sapiens gateway clone IMAGE:100018944 3' read AKR1A1 mRNA. [CU674331]	46034865	chr1	46034663	-	FALSE	hs|1p34.1		CU674331		chr1:46034865-46034663			Hs.597689
A_23_P71503	0.00464895	1.14396	0.194032	1.14396	up	-1.7919	-0.841492	1.7919	down	-2.04986	-1.03552	2.04986	down	64.1738	69.6583	92.5258	90.0162	96.381	104.154	137.582	70.2465	92.6222	0.0519228	-0.153293	-0.176158	-0.722891	-0.136734	0	0.889204	0.614744	0.742999	C8orf51	Homo sapiens chromosome 8 open reading frame 51 (C8orf51), non-coding RNA [NR_026785]	144448997	chr8	144448938	-	FALSE	hs|8q24.3	78998	NR_026785	chromosome 8 open reading frame 51	chr8:144448997-144448938		NR_026785	Hs.245886
A_32_P517749	0.00297281	1.11045	0.151147	1.11045	up	1.54537	0.627955	1.54537	up	1.39166	0.476808	1.39166	up	1353.79	1273.68	1934.39	1989.28	1739.09	2112.5	2238.68	1308.55	1721.54	0.112779	0.261231	0.268094	0	-0.0417072	0.230369	-0.53098	-0.234281	-0.476502	RPS6KA3	Homo sapiens ribosomal protein S6 kinase, 90kDa, polypeptide 3 (RPS6KA3), mRNA [NM_004586]	20168138	chrX	20168079	-	FALSE	hs|Xp22.12	6197	NM_004586	ribosomal protein S6 kinase, 90kDa, polypeptide 3	chrX:20168138-20168079	GO:0034142|GO:0007268|GO:0005634|GO:0051403|GO:0007243|GO:0005829|GO:0002756|GO:0005737|GO:0000166|GO:0007411|GO:0016301|GO:0002755|GO:0043154|GO:0034138|GO:0043027|GO:0048011|GO:0034130|GO:0000287|GO:0034134|GO:0002224|GO:0007417|GO:0005524|GO:0007165|GO:0016310|GO:0001501|GO:0008063|GO:0004672|GO:0004674|GO:0045087|GO:0005654|GO:0006468	NM_004586	Hs.445387
A_23_P21425	0.00192682	-1.13685	-0.185036	1.13685	down	2.63716	1.39899	2.63716	up	2.99805	1.58402	2.99805	up	102.354	158.132	421.331	418.199	437.277	313.847	128.264	90.7004	88.8117	-0.629966	0.374179	0.0417795	0	0.0118607	0.329239	-1.64613	-1.39123	-1.3736	GPR119	Homo sapiens G protein-coupled receptor 119 (GPR119), mRNA [NM_178471]	129518731	chrX	129518672	-	FALSE	hs|Xq26.1	139760	NM_178471	G protein-coupled receptor 119	chrX:129518731-129518672	GO:0005886|GO:0001619|GO:0004930|GO:0004872|GO:0016021|GO:0030073|GO:0008289	NM_178471	Hs.496762
A_24_P71153	0.00148709	-1.19989	-0.262901	1.19989	down	1.26501	0.339149	1.26501	up	1.51787	0.60205	1.51787	up	109.167	181.16	243.849	177.968	199.397	204.544	192.4	118.725	114.191	-0.0481328	0	0.199253	0.447475	0.309627	0.18272	-0.29357	-0.264919	-0.307839	PAFAH2	Homo sapiens platelet-activating factor acetylhydrolase 2, 40kDa (PAFAH2), mRNA [NM_000437]	26286933	chr1	26286874	-	FALSE	hs|1p36.11	5051	NM_000437	platelet-activating factor acetylhydrolase 2, 40kDa	chr1:26286933-26286874	GO:0016042|GO:0006629|GO:0005737|GO:0005543|GO:0016787|GO:0006916|GO:0003847	NM_000437	Hs.477083
A_24_P67638	0.00259739	1.0664	0.0927433	1.0664	up	1.45941	0.545385	1.45941	up	1.36854	0.452642	1.36854	up	3674.49	5393.74	8437.8	6595.39	6955.8	6342.55	3930.06	3545.09	3891.54	-0.0108871	0.244101	0.210276	0.162672	0.00258736	0	-0.465378	-0.266685	-0.460604			33059699	chrX	33059640	+	FALSE	hs|Xp21.1				chrX:033059640-033059699
A_23_P96542	0.00541228	1.01677	0.0239959	1.01677	up	1.58768	0.666924	1.58768	up	1.5615	0.642928	1.5615	up	619.94	880.192	1125.19	1179	1034.36	964.543	1054.15	670.93	765.087	-0.223434	0.262867	0.147249	0	0.0674639	0.0472307	-0.526249	-0.498729	-0.789113	VMA21	Homo sapiens VMA21 vacuolar H+-ATPase homolog (S. cerevisiae) (VMA21), mRNA [NM_001017980]	150573547	chrX	150573488	+	FALSE	hs|Xq28	203547	NM_001017980	VMA21 vacuolar H+-ATPase homolog (S. cerevisiae)	chrX:150573488-150573547	GO:0070072|GO:0030127|GO:0016020|GO:0005783|GO:0033116|GO:0005789|GO:0031410|GO:0016021|GO:0005764	NM_001017980	Hs.58633
A_23_P412059	0.00794787	1.13015	0.17651	1.13015	up	1.47997	0.565565	1.47997	up	1.30953	0.389055	1.30953	up	271.227	279.371	378.555	261.6	306.077	423.891	402.333	194.56	218.034	0.1531	0.0472426	0.213163	0	0.115584	-0.231611	-0.531296	-0.248403	-0.503491	ZRANB3	zinc finger, RAN-binding domain containing 3 [Source:HGNC Symbol;Acc:25249] [ENST00000403017]	135957533	chr2	135957474	-	FALSE	hs|2q21.3	84083	BC064616	zinc finger, RAN-binding domain containing 3	chr2:135957533-135957474	GO:0005622|GO:0004519|GO:0016787|GO:0000166|GO:0004386|GO:0008270|GO:0005524|GO:0003677|GO:0046872		Hs.658422
A_32_P108396	0.00764098	-1.90927	-0.933021	1.90927	down	1.36672	0.450719	1.36672	up	2.60944	1.38374	2.60944	up	22.5016	29.0414	39.2899	51.8757	49.1223	72.7933	76.5709	20.6304	27.7948	-0.331843	0	0.112951	1.17421	0.37448	1.03148	-0.941315	-0.331838	-0.297896		ALU2_HUMAN (P39189) Alu subfamily SB sequence contamination warning entry, partial (14%) [THC2555234]	61507643	chr15	61507584	-	FALSE	hs|15q22.2				chr15:061507643-061507584
A_32_P11471	0.00435317	1.23617	0.305872	1.23617	up	1.10946	0.149863	1.10946	up	-1.1142	-0.15601	1.1142	down	57248.5	81792	92643.6	92065.2	86904.2	74905.6	54340.4	59404.3	60013.2	0.0887546	0.140288	0.0429829	-0.190955	-0.236087	-0.218549	-0.179224	0	0.00166222	FAU	Homo sapiens Finkel-Biskis-Reilly murine sarcoma virus (FBR-MuSV) ubiquitously expressed (FAU), mRNA [NM_001997]	64888495	chr11	64888262	-	FALSE	hs|11q13.1	2197	NM_001997	Finkel-Biskis-Reilly murine sarcoma virus (FBR-MuSV) ubiquitously expressed	chr11:64888495-64888262	GO:0010467|GO:0003735|GO:0019083|GO:0003723|GO:0019058|GO:0015935|GO:0005575|GO:0006415|GO:0006412|GO:0005829|GO:0006414|GO:0005622|GO:0003674|GO:0008150|GO:0022627|GO:0031018|GO:0016032|GO:0044267	NM_001997	Hs.387208
A_32_P145856	0.00258634	-1.00199	-0.00286487	1.00199	down	1.58228	0.662009	1.58228	up	1.58543	0.664874	1.58543	up	2947.08	4671.17	8648.16	7770.42	7393.81	6963.24	3570.13	2655.19	3402.92	0	0.0527592	0.3141	0.232487	0.151037	-0.00806987	-0.528671	-0.381906	-0.70859			186618172	chr3	186618113	+	FALSE	hs|3q27.3				chr3:186618113-186618172
A_24_P120827	0.0045871	1.17758	0.235826	1.17758	up	2.39003	1.25703	2.39003	up	2.02961	1.0212	2.02961	up	128.124	137.802	200.859	146.084	188.964	220.11	145.676	79.0299	75.6907	0.371339	0.37337	0.120532	0.283262	0	-0.125498	-0.899921	-0.557597	-1.44832	HGSNAT	Homo sapiens heparan-alpha-glucosaminide N-acetyltransferase (HGSNAT), mRNA [NM_152419]	43056206	chr8	43056147	+	FALSE	hs|8p11.21	138050	NM_152419	heparan-alpha-glucosaminide N-acetyltransferase	chr8:43056147-43056206	GO:0015019|GO:0016020|GO:0007041|GO:0016021|GO:0005765|GO:0051259|GO:0016740|GO:0008415	NM_152419	Hs.600384
A_24_P696761	0.00456868	1.96548	0.974878	1.96548	up	-1.81945	-0.863499	1.81945	down	-3.57608	-1.83838	3.57608	down	73.8138	93.6676	90.0518	77.3132	85.9921	139.806	169.297	74.9893	94.1103	0	0.264591	-0.700943	-1.20117	-1.46305	-0.696771	1.05282	0.408526	0.692801	LEMD1	Homo sapiens LEM domain containing 1 (LEMD1), transcript variant 3, mRNA [NM_001001552]	205350823	chr1	205350764	-	FALSE	hs|1q32.1	93273	NM_001001552	LEM domain containing 1	chr1:205350823-205350764	GO:0016020|GO:0016021|GO:0005635	NM_001001552	Hs.655520
A_23_P114947	0.00223534	-1.8411	-0.880571	1.8411	down	1.46227	0.548207	1.46227	up	2.69219	1.42878	2.69219	up	1536.84	1651.4	2751.45	3189.84	3313.21	4141.95	1440.05	1084.82	1378.12	0	-0.17429	0.310243	1.04014	1.07259	0.664932	-0.898154	-0.380813	-0.2297	RGS2	Homo sapiens regulator of G-protein signaling 2, 24kDa (RGS2), mRNA [NM_002923]	192781110	chr1	192781051	+	FALSE	hs|1q31.2	5997	NM_002923	regulator of G-protein signaling 2, 24kDa	chr1:192781051-192781110	GO:0005515|GO:0005516|GO:0045744|GO:0005886|GO:0005730|GO:0005634|GO:0007283|GO:0010519|GO:0006417|GO:0005829|GO:0043547|GO:0005739|GO:0010614|GO:0005737|GO:0007049|GO:0008277|GO:0060452|GO:0050873|GO:0043407|GO:0009898|GO:0055119|GO:0004871|GO:0071877|GO:0005096	NM_002923	Hs.78944
A_24_P404033	0.00170484	1.40806	0.493708	1.40806	up	2.24844	1.16893	2.24844	up	1.59684	0.675218	1.59684	up	372.451	334.807	441.186	421.664	371.447	452.73	426.521	261.815	294.38	0.421101	0.728976	0.179217	-0.181693	0.0298624	0	-0.975991	-0.536077	-0.665418	C15orf38	Homo sapiens chromosome 15 open reading frame 38 (C15orf38), mRNA [NM_182616]	90444899	chr15	90444840	-	FALSE	hs|15q26.1	348110	NM_182616	chromosome 15 open reading frame 38	chr15:90444899-90444840		NM_182616	Hs.728822
A_23_P127233	0.000796074	1.14084	0.190098	1.14084	up	1.61022	0.687259	1.61022	up	1.41143	0.49716	1.41143	up	2179	2366.26	3345.98	3129.75	2685.76	3593.85	2815.26	1763.19	2156.8	0.0938128	0.124542	0.287819	0.0441197	0	-0.108241	-0.619332	-0.350014	-0.586257	SMNDC1	Homo sapiens survival motor neuron domain containing 1 (SMNDC1), mRNA [NM_005871]	112052932	chr10	112052873	-	FALSE	hs|10q25.2	10285	NM_005871	survival motor neuron domain containing 1	chr10:112052932-112052873	GO:0008380|GO:0006397|GO:0005515|GO:0005737|GO:0015030|GO:0016607|GO:0003723|GO:0000375|GO:0006915|GO:0005681|GO:0005634|GO:0006917	NM_005871	Hs.632093
A_32_P169505	0.00750931	2.41426	1.27158	2.41426	up	-1.544	-0.626669	1.544	down	-3.72761	-1.89825	3.72761	down	42.3438	31.64	41.1951	38.798	26.759	47.5485	202.264	32.137	43.0478	0.144403	-0.0703992	0	-1.35514	-1.41539	-0.9702	1.52974	0.0266953	0.397577	KIAA2022	Homo sapiens KIAA2022 (KIAA2022), mRNA [NM_001008537]	73953472	chrX	73953413	-	FALSE	hs|Xq13.3	340533	NM_001008537	KIAA2022	chrX:73953472-73953413	GO:0043625|GO:0000084|GO:0008296|GO:0007346|GO:0045004|GO:0003887|GO:0006287|GO:0006297|GO:0043137	NM_001008537	Hs.124128
A_32_P69683	0.00330283	-1.1348	-0.182437	1.1348	down	-1.31336	-0.393259	1.31336	down	-1.15735	-0.210822	1.15735	down	176.683	216.365	268.097	311.825	253.536	343.75	916.199	164.74	310.738	-0.275026	-0.105217	-0.193983	0	0.000939786	-0.0278539	0.300006	0.0777793	0.227766			139217418	chr6	139217359	-	FALSE	hs|6q24.1				chr6:139217418-139217359
A_23_P136986	0.00560691	-1.60571	-0.68321	1.60571	down	1.35991	0.443516	1.35991	up	2.18363	1.12673	2.18363	up	214.112	211.988	315.464	379.861	343.186	382.897	409.359	226.93	278.548	-0.285357	0	0.396588	0.388445	0.85332	0.919095	-0.45692	-0.304258	-0.45814	APOOL	Homo sapiens apolipoprotein O-like (APOOL), mRNA [NM_198450]	84342739	chrX	84342680	+	FALSE	hs|Xq21.1	139322	NM_198450	apolipoprotein O-like	chrX:84342680-84342739	GO:0005739|GO:0005743|GO:0005576	NM_198450	Hs.512181
A_24_P204664	0.00685103	1.11415	0.155943	1.11415	up	1.44294	0.529007	1.44294	up	1.2951	0.373064	1.2951	up	2038.79	2703.97	4740.33	3228.87	4218.89	3732.19	1666.62	1545.52	1540.97	0.190497	0.0623856	0.0949107	0.0940943	0	-0.214129	-0.557641	-0.257654	-0.423931			121032224	chr12	121032163	-	FALSE	hs|12q24.31				chr12:121032224-121032163
A_32_P11701	0.0063788	1.23123	0.300097	1.23123	up	2.07631	1.05402	2.07631	up	1.68637	0.753921	1.68637	up	96.9651	51.6079	119.427	134.64	113.538	93.9321	154.856	50.1799	50.6444	0.463747	0.0207421	0.574088	-0.137009	0	0.295293	-0.405638	-0.885727	-0.812113			44790576	chr3	44790517	+	FALSE	hs|3p21.31				chr3:044790517-044790576
A_23_P161488	0.00775382	-1.28961	-0.366935	1.28961	down	-1.25557	-0.328339	1.25557	down	1.02711	0.038596	1.02711	up	1046.65	1141.02	2050.61	1191.81	1567.15	2152.34	1273.59	1315	1289.61	-0.232815	-0.376348	-0.147484	0.170344	0.173815	0	0.0643921	-0.000135288	0.164114	TIAL1	Homo sapiens TIA1 cytotoxic granule-associated RNA binding protein-like 1 (TIAL1), transcript variant 2, mRNA [NM_001033925]	121336982	chr10	121336676	-	FALSE	hs|10q26.11	7073	NM_001033925	TIA1 cytotoxic granule-associated RNA binding protein-like 1	chr10:121336982-121336676	GO:0005737|GO:0006357|GO:0000166|GO:0010494|GO:0003723|GO:0006915|GO:0006952|GO:0005634|GO:0006917|GO:0003676|GO:0005764	NM_001033925	Hs.501203
A_23_P150053	0.0022007	-1.53426	-0.617542	1.53426	down	1.43902	0.525087	1.43902	up	2.20783	1.14263	2.20783	up	338.871	435.103	567.9	517.513	619.873	908.065	451.057	289.767	373.575	0	0.0454149	-0.218323	0.516024	0.428102	0.735593	-0.938067	-0.489116	-0.320987	ACTA2	Homo sapiens actin, alpha 2, smooth muscle, aorta (ACTA2), transcript variant 2, mRNA [NM_001613]	90697958	chr10	90697899	-	FALSE	hs|10q23.31	59	NM_001613	actin, alpha 2, smooth muscle, aorta	chr10:90697958-90697899	GO:0005737|GO:0006936|GO:0000166|GO:0008217|GO:0015629|GO:0009615|GO:0005524|GO:0030485|GO:0014829|GO:0005829	NM_001613	Hs.500483
A_23_P4069	0.00163234	1.05794	0.0812551	1.05794	up	2.16897	1.11701	2.16897	up	2.05019	1.03576	2.05019	up	133.958	161.376	265.746	243.15	254.586	219.06	343.93	76.0058	110.595	0	0.27575	0.477617	-0.0196509	0.257091	0.272161	-0.952267	-1.07807	-0.567339	TMEM220	Homo sapiens transmembrane protein 220 (TMEM220), mRNA [NM_001004313]	10628363	chr17	10626624	-	FALSE	hs|17p13.1	388335	NM_001004313	transmembrane protein 220	chr17:10628363-10626624	GO:0016020|GO:0016021	NM_001004313	Hs.462230
A_24_P296808	0.00563525	-1.02323	-0.0331271	1.02323	down	1.3736	0.457962	1.3736	up	1.40551	0.491089	1.40551	up	2672.51	2684.57	4117.26	3894.6	3399.65	4780.34	3253.2	2285.53	2901.72	-0.192267	0.0511856	0.162192	0	0.0531979	0.0672941	-0.586462	-0.414991	-0.351323	PNMAL1	Homo sapiens PNMA-like 1 (PNMAL1), transcript variant 1, mRNA [NM_018215]	46969838	chr19	46969779	-	FALSE	hs|19q13.32	55228	NM_018215	PNMA-like 1	chr19:46969838-46969779		NM_018215	Hs.8395
A_32_P55344	0.00345418	-1.0974	-0.134083	1.0974	down	1.80657	0.85325	1.80657	up	1.98252	0.987333	1.98252	up	379.58	423.356	673.553	552.979	624.581	685.865	538.012	227.09	355.919	-0.195837	0	0.136808	0.0869701	0.181009	0.0752411	-1.23654	-0.841943	-0.540292		17000583182148 GRN_PRENEU Homo sapiens cDNA 5', mRNA sequence [CN364769]	61048679	chr18	61048620	+	FALSE	hs|18q21.33		CN364769		chr18:61048620-61048679			Hs.596910
A_24_P557232	0.0039777	1.30341	0.382295	1.30341	up	1.29684	0.375	1.29684	up	-1.00507	-0.00729531	1.00507	down	5969.83	5309.08	7133.55	6549.28	6559.23	6183.84	6547.3	4647.29	5870.18	0.440808	0.440067	0.173235	0.0118761	-0.0164576	-0.0881939	-0.0243588	0	-0.0465307		K-EST0153390 L5HLK1 Homo sapiens cDNA clone L5HLK1-3-D02 5', mRNA sequence [CB111670]	35590933	chr22	35590874	-	FALSE	hs|22q12.3		CB111670		chr22:35590933-35590874			Hs.581009
A_24_P823684	0.00854795	-1.30019	-0.378726	1.30019	down	-1.24826	-0.319917	1.24826	down	1.04161	0.0588086	1.04161	up	2733.97	2995.01	5023.48	2441.31	4289.36	5846.74	2882.5	3655.15	3434.93	-0.368415	-0.26103	-0.26978	0.0286654	0.122477	0.0858089	0.191299	-0.130774	0	HSP90AB1	Homo sapiens heat shock protein 90kDa alpha (cytosolic), class B member 1 (HSP90AB1), mRNA [NM_007355]	44219270	chr6	44219211	+	FALSE	hs|6p21.1	3326	NM_007355	heat shock protein 90kDa alpha (cytosolic), class B member 1	chr6:44219211-44219270	GO:0005515|GO:0006986|GO:0009651|GO:0031526|GO:0032435|GO:0045429|GO:0005829|GO:0060334|GO:0005739|GO:0005622|GO:0016323|GO:0005737|GO:0016324|GO:0060338|GO:0000166|GO:0008180|GO:0006457|GO:0007411|GO:0030235|GO:0042470|GO:0030911|GO:0032564|GO:0005625|GO:0001890|GO:0005525|GO:0005524|GO:0002135|GO:0002134|GO:0071407|GO:0051082	NM_007355	Hs.509736
A_23_P121356	0.00907348	1.04204	0.0594122	1.04204	up	1.53714	0.62025	1.53714	up	1.47513	0.560838	1.47513	up	1775.57	2120.22	3149.4	3071.39	2763.34	2995.12	2259.64	1837.05	2152.78	0	0.185264	0.238634	0.0681544	-0.00999728	0.187504	-0.772846	-0.284621	-0.379385	BBX	Homo sapiens bobby sox homolog (Drosophila) (BBX), transcript variant 2, mRNA [NM_020235]	107524593	chr3	107524534	+	FALSE	hs|3q13.12	56987	NM_020235	bobby sox homolog (Drosophila)	chr3:107524534-107524593	GO:0006355|GO:0005634|GO:0003677	NM_020235	Hs.124366
A_23_P391689	0.00242304	1.17771	0.235985	1.17771	up	1.10302	0.141455	1.10302	up	-1.06772	-0.0945302	1.06772	down	8241.72	8751.59	11876.4	12652.7	10787.7	10168.3	9854.32	7337.86	9761.13	0.202115	0.105798	0.134296	-0.0705442	-0.0427074	-0.152495	-0.0199507	0.0377942	0	C19orf79	Homo sapiens chromosome 19 open reading frame 79 (C19orf79), transcript variant 1, mRNA [NM_001171155]	7695541	chr19	7695482	+	FALSE	hs|19p13.2	100131801	NM_001171155	chromosome 19 open reading frame 79	chr19:7695482-7695541		NM_001171155	Hs.728837
A_32_P46510	0.00685582	-1.01252	-0.0179552	1.01252	down	1.38441	0.469268	1.38441	up	1.40174	0.487223	1.40174	up	2241.52	2347.26	3251.65	3927.92	3327.36	3621.24	3259.47	1640.25	2927.26	-0.159413	0.159357	0.0290489	0.063798	0	0.019061	-0.561119	-0.547443	-0.270247	ZC3H6	Homo sapiens zinc finger CCCH-type containing 6 (ZC3H6), mRNA [NM_198581]	113057476	chr2	113033595	+	FALSE	hs|2q13	376940	NM_198581	zinc finger CCCH-type containing 6	chr2:113033595-113057476	GO:0008150|GO:0003674|GO:0008270|GO:0005575|GO:0003676|GO:0046872	NM_198581	Hs.190477
A_24_P145787	0.00306927	1.16687	0.222647	1.16687	up	1.33768	0.41973	1.33768	up	1.14638	0.197083	1.14638	up	86928.1	93079.1	103232	116152	101728	125685	90422.6	74833.8	90881.5	0.236324	0.176439	0.25997	0	-0.0275441	0.0323352	-0.19742	-0.0540198	-0.335018			134070738	chr3	134070679	-	FALSE	hs|3q22.2				chr3:134070738-134070679
A_23_P119202	0.00307093	-2.51431	-1.33016	2.51431	down	-1.19255	-0.254045	1.19255	down	2.10835	1.07612	2.10835	up	429.46	536.488	715.991	793.24	809.739	1051.32	787.325	505.006	485.315	-0.197567	-0.426191	-0.722479	0.649703	0.895245	1.0993	0.0335977	0	-0.617701	CD70	Homo sapiens CD70 molecule (CD70), mRNA [NM_001252]	6585916	chr19	6585857	-	FALSE	hs|19p13.3	970	NM_001252	CD70 molecule	chr19:6585916-6585857	GO:0005515|GO:0005164|GO:0005886|GO:0008283|GO:0005102|GO:0007267|GO:0006917|GO:0002020|GO:0005125|GO:0005615|GO:0007165|GO:0006955|GO:0016020|GO:0005887|GO:0000299	NM_001252	Hs.501497
A_23_P320113	0.00469019	-1.11201	-0.153174	1.11201	down	1.11593	0.158241	1.11593	up	1.24092	0.311415	1.24092	up	1468.27	1791.55	2452.35	1966.15	2199.61	2826.94	1814.08	1493.94	1610.36	0.00512507	-0.041519	0	0.147539	0.176737	0.0988512	-0.292463	-0.0740861	-0.144568	SRXN1	Homo sapiens sulfiredoxin 1 (SRXN1), mRNA [NM_080725]	627622	chr20	627563	-	FALSE	hs|20p13	140809	NM_080725	sulfiredoxin 1	chr20:627622-627563	GO:0016667|GO:0032542|GO:0005737|GO:0016209|GO:0000166|GO:0006979|GO:0005524|GO:0003677|GO:0005829	NM_080725	Hs.516830
A_24_P149445	0.00598689	-2.82707	-1.49931	2.82707	down	-1.27533	-0.350869	1.27533	down	2.21674	1.14844	2.21674	up	19.7315	9.18266	16.5014	36.8428	28.6171	35.789	555.482	12.8975	17.7439	-0.578509	0	-0.326467	0.971847	1.6185	1.0026	0.554477	-0.229189	-0.177659	FLJ40852	Homo sapiens hypothetical LOC285962 (FLJ40852), non-coding RNA [NR_015392]	141423824	chr7	141423765	-	FALSE	hs|7q34	285962	NR_015392	hypothetical LOC285962	chr7:141423824-141423765		NR_015392	Hs.17589
A_23_P124912	0.00110314	-1.08704	-0.120405	1.08704	down	1.62616	0.701469	1.62616	up	1.7677	0.821874	1.7677	up	4593.91	4407.75	6436.26	8591.89	6552.53	7275.34	6791.22	4777.69	6427.78	-0.178561	0.0993632	0.137579	0	0.119297	0.3003	-0.802801	-0.554347	-0.688877	NPEPPS	Homo sapiens aminopeptidase puromycin sensitive (NPEPPS), mRNA [NM_006310]	45699474	chr17	45699415	+	FALSE	hs|17q21.32	9520	NM_006310	aminopeptidase puromycin sensitive	chr17:45699415-45699474	GO:0005515|GO:0005737|GO:0004177|GO:0006508|GO:0008270|GO:0008233|GO:0005634|GO:0046872|GO:0008237|GO:0005829	NM_006310	Hs.443837
A_23_P168898	0.00305069	1.11984	0.163288	1.11984	up	1.20488	0.268885	1.20488	up	1.07594	0.105598	1.07594	up	96850.4	111747	127211	156743	131483	135913	109539	95510.6	111389	0.160786	0.124954	0.248156	-0.0186214	0.0626546	0	-0.0526103	-0.0609855	-0.159164	RPS20	Homo sapiens ribosomal protein S20 (RPS20), transcript variant 2, mRNA [NM_001023]	56985718	chr8	56985659	-	FALSE	hs|8q12.1	6224	NM_001023	ribosomal protein S20	chr8:56985718-56985659	GO:0005515|GO:0010467|GO:0003735|GO:0003723|GO:0019083|GO:0019058|GO:0006415|GO:0006412|GO:0005829|GO:0006414|GO:0005622|GO:0005737|GO:0022627|GO:0031018|GO:0016032|GO:0044267	NM_001023	Hs.8102
A_32_P58425	0.000244732	-1.04723	-0.0665801	1.04723	down	1.27661	0.352315	1.27661	up	1.3369	0.418895	1.3369	up	1238.12	1764.77	2266.52	1926.4	2088.38	2238.14	1664.82	1122.37	1342.63	0	0.0192567	-0.0489922	0.0335636	0.136015	0.000426292	-0.296165	-0.420465	-0.37005	PHF13	Homo sapiens PHD finger protein 13 (PHF13), mRNA [NM_153812]	6683871	chr1	6683812	+	FALSE	hs|1p36.31	148479	NM_153812	PHD finger protein 13	chr1:6683812-6683871	GO:0007076|GO:0007067|GO:0007059|GO:0003682|GO:0008270|GO:0005654|GO:0005634|GO:0035064|GO:0000278|GO:0046872|GO:0051301|GO:0016568	NM_153812	Hs.516079
A_24_P156922	0.00994422	1.95758	0.969068	1.95758	up	-2.33339	-1.22243	2.33339	down	-4.5678	-2.1915	4.5678	down	36.8089	38.99	63.4067	24.0003	34.9196	65.3995	734.812	37.5245	40.7554	0	-0.281338	0.328945	-0.533085	-1.70631	-0.620201	1.87115	0.509293	1.33446	SCP2	Homo sapiens sterol carrier protein 2 (SCP2), transcript variant 2, mRNA [NM_001007098]	53446180	chr1	53446121	+	FALSE	hs|1p32.3	6342	NM_001007098	sterol carrier protein 2	chr1:53446121-53446180	GO:0005515|GO:0016747|GO:0006694|GO:0005782|GO:0006699|GO:0005730|GO:0050632|GO:0033814|GO:0005634|GO:0003824|GO:0043231|GO:0008289|GO:0005739|GO:0032934|GO:0005737|GO:0006869|GO:0006810|GO:0007031|GO:0008206|GO:0033540|GO:0044255|GO:0016740|GO:0005777	NM_001007098	Hs.476365
A_23_P209360	0.00278802	-1.82534	-0.868167	1.82534	down	1.17216	0.229172	1.17216	up	2.1396	1.09734	2.1396	up	630.18	664.651	1081.21	1320.08	1373.1	1642.99	962.347	653.581	908.288	-0.359495	-0.0163088	0.273234	0.789984	0.947226	0.764721	-0.445289	-0.344798	0	KLHL29	Homo sapiens kelch-like 29 (Drosophila) (KLHL29), mRNA [NM_052920]	23931368	chr2	23931309	+	FALSE	hs|2p24.1	114818	NM_052920	kelch-like 29 (Drosophila)	chr2:23931309-23931368		NM_052920	Hs.130593
A_24_P485219	0.00254511	1.02009	0.0287018	1.02009	up	2.03619	1.02587	2.03619	up	1.99608	0.997173	1.99608	up	251.432	170.747	324.713	202.283	288.004	453.051	296.889	214.492	218.244	0.190409	-0.085702	0.350899	0	0.0260138	0.343487	-0.993069	-0.557749	-1.0712	MAGT1	Homo sapiens magnesium transporter 1 (MAGT1), mRNA [NM_032121]	77084265	chrX	77084206	-	FALSE	hs|Xq21.1	84061	NM_032121	magnesium transporter 1	chrX:77084265-77084206	GO:0016020|GO:0005783|GO:0004579|GO:0016021|GO:0008250|GO:0018279	NM_032121	Hs.323562
A_23_P23873	0.00457841	-3.45642	-1.78928	3.45642	down	-1.211	-0.276194	1.211	down	2.8542	1.51309	2.8542	up	21.0215	10.3121	9.8103	32.3988	25.8046	28.5331	983.571	11.2942	15.5154	-0.935581	-0.294964	0	1.01731	1.69297	1.42702	-0.262734	-0.513671	0.374442	PAPPA2	Homo sapiens pappalysin 2 (PAPPA2), transcript variant 1, mRNA [NM_020318]	176811823	chr1	176811764	+	FALSE	hs|1q25.2	60676	NM_020318	pappalysin 2	chr1:176811764-176811823	GO:0005622|GO:0016020|GO:0006508|GO:0008270|GO:0008233|GO:0005576|GO:0004222|GO:0001558|GO:0046872|GO:0030154|GO:0008237	NM_020318	Hs.187284
A_32_P51905	0.00421209	1.0179	0.0255982	1.0179	up	1.18173	0.240899	1.18173	up	1.16095	0.215301	1.16095	up	5636.65	5096.04	7596.63	7245.72	6336.4	8428.96	7515.51	4943.44	6167.76	0.0307665	-0.0375881	0.138339	0.0373583	0.0173644	0	-0.241104	-0.153931	-0.196145	KIAA1191	Homo sapiens KIAA1191 (KIAA1191), transcript variant 1, mRNA [NM_020444]	175773286	chr5	175773228	-	FALSE	hs|5q35.2	57179	NM_020444	KIAA1191	chr5:175773286-175773228	GO:0005515|GO:0008150|GO:0003674|GO:0005575	NM_020444	Hs.730636
A_23_P127095	0.00718494	-1.05865	-0.0822294	1.05865	down	1.3992	0.484607	1.3992	up	1.48127	0.566836	1.48127	up	22150.8	21554	29100	38812.7	30963.4	29419.5	26908.5	21248.2	23728.5	-0.00979811	0.0314769	0.185755	0	0.133927	0.320194	-0.410597	-0.242412	-0.593379	USMG5	Homo sapiens up-regulated during skeletal muscle growth 5 homolog (mouse) (USMG5), transcript variant 2, mRNA [NM_032747]	105148909	chr10	105148850	-	FALSE	hs|10q24.33	84833	NM_032747	up-regulated during skeletal muscle growth 5 homolog (mouse)	chr10:105148909-105148850	GO:0005739|GO:0016020|GO:0005743|GO:0016021	NM_032747	Hs.500921
A_24_P248606	0.00315739	-1.10436	-0.143209	1.10436	down	1.34625	0.428945	1.34625	up	1.48674	0.572154	1.48674	up	1308.89	1290.06	1937.54	1762.37	1807.52	2524.33	1918.05	1147.3	1529.74	-0.0571586	0	0.269737	0.280504	0.25665	0.105052	-0.447815	-0.301163	-0.325278	ACSL3	Homo sapiens acyl-CoA synthetase long-chain family member 3 (ACSL3), transcript variant 1, mRNA [NM_004457]	223807554	chr2	223807495	+	FALSE	hs|2q36.1	2181	NM_004457	acyl-CoA synthetase long-chain family member 3	chr2:223807495-223807554	GO:0005515|GO:0014070|GO:0005792|GO:0007584|GO:0005783|GO:0016874|GO:0005741|GO:0035338|GO:0005524|GO:0004467|GO:0004321|GO:0005739|GO:0016020|GO:0000166|GO:0007420|GO:0019432|GO:0005789|GO:0006633|GO:0016021|GO:0044255|GO:0005778|GO:0005777	NM_004457	Hs.655772
A_23_P311732	0.00898948	-1.1697	-0.226135	1.1697	down	1.60431	0.681955	1.60431	up	1.87656	0.90809	1.87656	up	292.21	264.331	421.092	344.555	414.139	528.752	440.968	316.671	312.347	0.145429	-0.0601581	0	0.0635868	0.172803	0.527286	-0.468285	-0.462759	-1.02955	GNG12	Homo sapiens guanine nucleotide binding protein (G protein), gamma 12 (GNG12), mRNA [NM_018841]	68167168	chr1	68167131	-	FALSE	hs|1p31.3	55970	NM_018841	guanine nucleotide binding protein (G protein), gamma 12	chr1:68167168-68167131	GO:0021987|GO:0005886|GO:0005884|GO:0005834|GO:0007268|GO:0007165|GO:0006112|GO:0007186|GO:0016020|GO:0071377|GO:0042301|GO:0032496|GO:0004871	NM_018841	Hs.431101
A_23_P159325	0.00409343	-2.22201	-1.15187	2.22201	down	2.04452	1.03176	2.04452	up	4.54294	2.18363	4.54294	up	301.329	440.597	680.865	835.846	986.775	749.846	355.779	362.742	292.223	0	-0.308218	0.29578	0.809372	1.45188	1.18191	-1.83955	-0.678971	-0.589197	ANGPTL4	Homo sapiens angiopoietin-like 4 (ANGPTL4), transcript variant 1, mRNA [NM_139314]	8439228	chr19	8439169	+	FALSE	hs|19p13.2	51129	NM_139314	angiopoietin-like 4	chr19:8439169-8439228	GO:0004857|GO:0005515|GO:0001666|GO:0043066|GO:0005102|GO:0005578|GO:0070328|GO:0005576|GO:0007275|GO:0005615|GO:0043086|GO:0045766|GO:0030154|GO:0051005|GO:0007165|GO:0051260|GO:0044255	NM_139314	Hs.9613
A_24_P230156	0.0021881	-1.08728	-0.120722	1.08728	down	1.75292	0.809761	1.75292	up	1.90591	0.930483	1.90591	up	82.1497	125.472	240.529	191.57	214.413	186.438	208.604	88.1011	81.099	-0.217955	0.0903282	0.253158	0	0.100854	0.386844	-0.617829	-0.856141	-0.829783	JRK	Homo sapiens jerky homolog (mouse) (JRK), transcript variant 1, mRNA [NM_003724]	143740859	chr8	143740800	-	FALSE	hs|8q24.3	8629	NM_003724	jerky homolog (mouse)	chr8:143740859-143740800	GO:0008150|GO:0003674|GO:0006355|GO:0005634|GO:0005575|GO:0003677	NM_003724	Hs.535903
A_23_P138725	0.000324678	-1.11719	-0.159872	1.11719	down	1.345	0.427607	1.345	up	1.50262	0.587478	1.50262	up	3716.27	4911.22	6716.12	6679.12	6250.51	6557.17	4378.97	3645.5	4172.11	-0.0819864	0	0.0357429	0.0642939	0.178189	0.190888	-0.467269	-0.538053	-0.323742	MARVELD1	Homo sapiens MARVEL domain containing 1 (MARVELD1), mRNA [NM_031484]	99477878	chr10	99477819	+	FALSE	hs|10q24.2	83742	NM_031484	MARVEL domain containing 1	chr10:99477819-99477878	GO:0016020|GO:0005634|GO:0016021	NM_031484	Hs.730701
A_24_P11791	0.000396529	1.04958	0.0698137	1.04958	up	1.33899	0.421141	1.33899	up	1.27573	0.351328	1.27573	up	2934.63	2951.83	4140.66	3990.88	3757.96	5006.55	3843.17	2673.85	3138.93	0.0157833	0.119003	0.0847112	0	-0.0319118	0.0419684	-0.358878	-0.253683	-0.431365	KPNA4	Homo sapiens karyopherin alpha 4 (importin alpha 3) (KPNA4), mRNA [NM_002268]	160218102	chr3	160218043	-	FALSE	hs|3q25.33	3840	NM_002268	karyopherin alpha 4 (importin alpha 3)	chr3:160218102-160218043	GO:0005515|GO:0005737|GO:0005643|GO:0008565|GO:0005634|GO:0006886|GO:0006607	NM_002268	Hs.730660
A_32_P180336	0.00497488	-1.05291	-0.0743757	1.05291	down	2.37448	1.24761	2.37448	up	2.50011	1.32199	2.50011	up	133.581	185.758	413.693	397.814	365.633	308.078	115.987	79.6218	71.7742	-0.018127	0.161876	0	0.0928932	0.124003	0.14998	-1.21869	-0.615966	-1.76444	C11orf92	Homo sapiens chromosome 11 open reading frame 92 (C11orf92), non-coding RNA [NR_034154]	111169140	chr11	111169081	-	FALSE	hs|11q23.1	399948	NR_034154	chromosome 11 open reading frame 92	chr11:111169140-111169081	GO:0016020|GO:0016021	NR_034154	Hs.729225
A_24_P64071	0.00161761	-1.28023	-0.356405	1.28023	down	1.5628	0.64413	1.5628	up	2.00074	1.00053	2.00074	up	122.608	108.641	168.452	164.149	199.638	244.364	196.33	137.808	136.467	0	-0.00832546	0.158665	0.114056	0.636223	0.469274	-0.634197	-0.427551	-0.720303	ZBTB10	Homo sapiens zinc finger and BTB domain containing 10 (ZBTB10), transcript variant 2, mRNA [NM_023929]	81431463	chr8	81431136	+	FALSE	hs|8q21.13	65986	NM_023929	zinc finger and BTB domain containing 10	chr8:81431136-81431463	GO:0005622|GO:0006355|GO:0005730|GO:0008270|GO:0005634|GO:0000122|GO:0003677|GO:0046872	NM_023929	Hs.591868
A_24_P168510	0.00659065	1.38283	0.467619	1.38283	up	-1.09886	-0.136013	1.09886	down	-1.51954	-0.603632	1.51954	down	583.827	734.964	1022.79	428.851	739.065	1066.36	1066.58	762.725	545.462	0.15327	0.0114887	-0.322097	-0.517737	-0.588179	-0.45428	0.136326	0.114375	0	C19orf50	Homo sapiens chromosome 19 open reading frame 50 (C19orf50), transcript variant 2, mRNA [NM_024069]	18677943	chr19	18675774	+	FALSE	hs|19p13.11	79036	NM_024069	chromosome 19 open reading frame 50	chr19:18675774-18677943	GO:0005515	NM_024069	Hs.369785
A_23_P125705	0.00538589	2.28698	1.19344	2.28698	up	-2.60945	-1.38375	2.60945	down	-5.96776	-2.57719	5.96776	down	51.0862	50.8804	57.7995	41.8187	39.536	68.1692	239.331	46.0767	56.2604	0.148589	0	-0.415538	-0.775116	-0.895088	-2.17708	1.93995	0.72905	1.21529	NAP1L2	Homo sapiens nucleosome assembly protein 1-like 2 (NAP1L2), mRNA [NM_021963]	72432731	chrX	72432672	-	FALSE	hs|Xq13.2	4674	NM_021963	nucleosome assembly protein 1-like 2	chrX:72432731-72432672	GO:0005678|GO:0006334|GO:0005634	NM_021963	Hs.730784
A_23_P329198	0.00892233	-2.99289	-1.58154	2.99289	down	-1.30192	-0.380642	1.30192	down	2.29883	1.2009	2.29883	up	188.039	242.674	292.321	303.245	288.614	392.262	359.787	220.656	229.372	-0.0819979	-0.906281	-0.0149112	0.991282	1.50622	1.24393	0.539055	0	-0.400319	OBFC2A	Homo sapiens oligonucleotide/oligosaccharide-binding fold containing 2A (OBFC2A), transcript variant 1, mRNA [NM_001031716]	192551614	chr2	192551555	+	FALSE	hs|2q32.3	64859	NM_001031716	oligonucleotide/oligosaccharide-binding fold containing 2A	chr2:192551555-192551614	GO:0031576|GO:0006281|GO:0003697|GO:0000724|GO:0010212|GO:0003723|GO:0070876|GO:0005634|GO:0003677|GO:0006974	NM_001031716	Hs.591610
A_24_P101742	0.00280956	1.04865	0.0685302	1.04865	up	1.52926	0.612837	1.52926	up	1.45832	0.544307	1.45832	up	302.86	559.977	764.584	621.644	704.619	625.288	518.081	371.032	378.045	0.31826	0.0982103	-0.012805	0	0.0399976	0.158077	-0.339212	-0.470867	-0.624767							FALSE
A_23_P27724	0.00664662	-1.13934	-0.188198	1.13934	down	1.23459	0.304036	1.23459	up	1.40662	0.492234	1.40662	up	8137.1	11573.6	12850.9	12733.6	12252.6	11616	8037.32	8059.88	8361.45	-0.258324	0.0255919	0	0.0536328	0.183368	0.0948603	-0.413838	-0.479591	-0.251411	SEPW1	Homo sapiens selenoprotein W, 1 (SEPW1), mRNA [NM_003009]	48287886	chr19	48287827	+	FALSE	hs|19q13.33	6415	NM_003009	selenoprotein W, 1	chr19:48287827-48287886	GO:0008430|GO:0005737|GO:0016209|GO:0045454	NM_003009	Hs.631549
A_23_P41999	0.00914924	1.14735	0.198311	1.14735	up	1.34973	0.432669	1.34973	up	1.17638	0.234358	1.17638	up	778.212	636.895	949.703	752.683	734.356	1147.14	1330.78	657.672	682.195	0.13889	0.394165	0.146699	-0.0566205	0	0.141443	-0.214698	-0.126431	-0.277123	SMAP1	Homo sapiens small ArfGAP 1 (SMAP1), transcript variant 1, mRNA [NM_001044305]	71570444	chr6	71570385	+	FALSE	hs|6q13	60682	NM_001044305	small ArfGAP 1	chr6:71570385-71570444	GO:0008060|GO:0005886|GO:0045648|GO:0032312|GO:0008270|GO:0046872	NM_001044305	Hs.485717
A_23_P27573	0.000343845	-1.05136	-0.0722604	1.05136	down	1.29267	0.370352	1.29267	up	1.35906	0.442613	1.35906	up	1748.89	2222.89	3198.94	2790	3165.54	3083.39	1989.84	1789.93	1841.12	-0.0037652	0.106191	0	0.0717065	0.0624569	0.185043	-0.385905	-0.263053	-0.359674	TFPT	Homo sapiens TCF3 (E2A) fusion partner (in childhood Leukemia) (TFPT), mRNA [NM_013342]	54610433	chr19	54610374	-	FALSE	hs|19q13.42	29844	NM_013342	TCF3 (E2A) fusion partner (in childhood Leukemia)	chr19:54610433-54610374	GO:0005515|GO:0031011|GO:0006355|GO:0005737|GO:0006281|GO:0006915|GO:0006310|GO:0005634|GO:0006917|GO:0003677	NM_013342	Hs.590939
A_24_P405205	0.000231007	-1.26049	-0.333987	1.26049	down	1.10309	0.141549	1.10309	up	1.39044	0.475537	1.39044	up	1999.8	2346.36	3407	2708.33	3155.39	3923.51	2660.49	1803.85	2448.67	0	0.0921583	-0.0523405	0.321907	0.388577	0.331296	-0.210143	-0.084034	-0.0906534	ATP2B4	Homo sapiens ATPase, Ca++ transporting, plasma membrane 4 (ATP2B4), transcript variant 1, mRNA [NM_001001396]	203713100	chr1	203713041	+	FALSE	hs|1q32.1	493	NM_001001396	ATPase, Ca++ transporting, plasma membrane 4	chr1:203713041-203713100	GO:0005515|GO:0005516|GO:0003407|GO:0005886|GO:0030168|GO:0030165|GO:0055085|GO:0005524|GO:0046872|GO:0005388|GO:0006754|GO:0034220|GO:0000166|GO:0016787|GO:0005887|GO:0007596|GO:0070588|GO:0006810|GO:0016820|GO:0006812	NM_001001396	Hs.343522
A_32_P129120	0.0032139	2.40582	1.26653	2.40582	up	-2.2116	-1.14509	2.2116	down	-5.32071	-2.41162	5.32071	down	18.685	21.5831	32.9881	26.6509	11.6217	12.8549	76.0493	10.6035	14.7377	0.327391	-0.825925	0	-1.9078	-0.896035	-1.49428	0.811626	0.71214	1.41297	FAM182A	Homo sapiens family with sequence similarity 182, member A (FAM182A), non-coding RNA [NR_026713]	26061836	chr20	26054483	+	FALSE	hs|20p11.1	284800	NR_026713	family with sequence similarity 182, member A	chr20:26054483-26061836		NR_026713	Hs.662381
A_32_P46404	0.00968815	-1.62844	-0.70349	1.62844	down	1.24164	0.312242	1.24164	up	2.02193	1.01573	2.02193	up	170.345	165.613	341.856	446.075	381.145	407.062	359.048	201.826	269.053	-0.41125	0	0.383125	0.72844	0.779285	0.574618	-0.581954	-0.193801	-0.189096		PREDICTED: Homo sapiens hypothetical LOC100131679 (LOC100131679), partial miscRNA [XR_108477]	125604985	chr3	125604926	-	FALSE	hs|3q21.2		XR_108477		chr3:125604985-125604926		XR_108477	Hs.506711
A_32_P189523	0.00185935	3.0768	1.62143	3.0768	up	-1.94726	-0.961443	1.94726	down	-5.99132	-2.58287	5.99132	down	35.4768	23.4929	38.3017	47.0942	26.6483	19.0014	693.41	33.2856	68.9312	-0.460668	0.170792	0	-2.14352	-1.7252	-1.28545	1.32422	0.117722	1.15251		Q32Q92_MOUSE (Q32Q92) Acyl-CoA thioesterase 6 , partial (17%) [THC2658800]	74083649	chr14	74083590	-	FALSE	hs|14q24.3				chr14:074083649-074083590
A_24_P402510	0.00898548	-1.58763	-0.666879	1.58763	down	1.6468	0.719668	1.6468	up	2.61452	1.38655	2.61452	up	208.556	272.904	428.759	442.19	488.45	400.678	389.558	235.239	245.173	-0.180447	0.0311853	0	0.522719	0.65586	0.672797	-0.160424	-1.35792	-0.789926	SAMD11	Homo sapiens sterile alpha motif domain containing 11 (SAMD11), mRNA [NM_152486]	879507	chr1	879448	+	FALSE	hs|1p36.33	148398	NM_152486	sterile alpha motif domain containing 11	chr1:879448-879507	GO:0005634	NM_152486	Hs.335293
A_32_P191735	0.00326718	1.38901	0.474053	1.38901	up	1.56436	0.645575	1.56436	up	1.12625	0.171522	1.12625	up	136.689	117.73	188.952	150.102	136.864	193.436	188.888	99.2489	116.997	0.652138	0.339915	0.44905	-0.0586465	0.0775887	0	-0.360603	-0.0737736	-0.0612472		ie09h05.y5 HR85 islet Homo sapiens cDNA clone IMAGE:5086712 5', mRNA sequence [CK820941]	99988594	chr4	99988535	-	FALSE	hs|4q23		CK820941		chr4:99988594-99988535			Hs.596906
A_23_P346670	0.00627391	-1.28025	-0.356424	1.28025	down	1.84607	0.884457	1.84607	up	2.36343	1.24088	2.36343	up	52.4881	86.4148	157.661	163.099	158.582	134.343	128.82	49.9149	62.5342	-0.442912	0	0.263203	0.438755	0.283731	0.167075	-0.599434	-1.32122	-0.912425	GPRC5C	G protein-coupled receptor, family C, group 5, member C [Source:HGNC Symbol;Acc:13309] [ENST00000392628]	72446499	chr17	72446440	+	FALSE	hs|17q25.1	55890	AK000249	G protein-coupled receptor, family C, group 5, member C	chr17:72446440-72446499	GO:0005739|GO:0005515|GO:0007186|GO:0005886|GO:0005887|GO:0004930|GO:0004872|GO:0031410|GO:0030659		Hs.446438
A_23_P22744	0.0036907	-2.76781	-1.46875	2.76781	down	1.73634	0.796046	1.73634	up	4.80585	2.26479	4.80585	up	88.4103	114.182	162.353	245.847	198.936	206.26	165.899	91.6147	96.0999	-0.421374	0	1.13282	1.74769	1.62762	1.74238	-0.246654	-0.707156	-0.722876	PAGE5	Homo sapiens P antigen family, member 5 (prostate associated) (PAGE5), transcript variant 1, mRNA [NM_130467]	55250443	chrX	55249144	+	FALSE	hs|Xp11.21	90737	NM_130467	P antigen family, member 5 (prostate associated)	chrX:55249144-55250443		NM_130467	Hs.668491
A_23_P108303	0.00232834	-1.0305	-0.043348	1.0305	down	1.19079	0.251918	1.19079	up	1.22711	0.295266	1.22711	up	8691.6	7636.88	10444.1	13000.6	10793.3	11487.2	10307.5	8284.82	10756	-0.0181885	0	0.00268063	0.000255525	0.00889969	0.105381	-0.241294	-0.175931	-0.354036	NDUFA7	Homo sapiens NADH dehydrogenase (ubiquinone) 1 alpha subcomplex, 7, 14.5kDa (NDUFA7), nuclear gene encoding mitochondrial protein, mRNA [NM_005001]	8376334	chr19	8376275	-	FALSE	hs|19p13.2	4701	NM_005001	NADH dehydrogenase (ubiquinone) 1 alpha subcomplex, 7, 14.5kDa	chr19:8376334-8376275	GO:0022904|GO:0005739|GO:0042773|GO:0005747|GO:0016020|GO:0070469|GO:0006810|GO:0006120|GO:0005743|GO:0008137	NM_005001	Hs.333427
A_32_P59116	0.00754707	-1.11811	-0.16106	1.11811	down	1.07696	0.106966	1.07696	up	1.20416	0.268026	1.20416	up	852.956	606.152	1224.98	1334.28	1152.53	1385.32	1650.97	948.75	1465.39	0.0703888	-0.101236	0	0.198353	0.0732585	0.180721	-0.084548	-0.111327	-0.155871	GOLGA8F	Homo sapiens golgin A8 family, member F (GOLGA8F), non-coding RNA [NR_033351]	28627570	chr15	28626657	+	FALSE	hs|15q13.1	100132565	NR_033351	golgin A8 family, member F	chr15:28626657-28627570		NR_033351	Hs.676962
A_32_P190488	0.00384607	1.17842	0.236856	1.17842	up	1.27116	0.346142	1.27116	up	1.07869	0.109285	1.07869	up	151163	163635	160081	201525	165018	183047	142805	120862	154448	0.125652	0.275474	0.20451	0	0.000223219	-0.105156	-0.238676	-0.0589161	-0.135197		HUMRPL26X ribosomal protein L26 {Homo sapiens} (exp=-1; wgp=0; cg=0), partial (91%) [THC2550570]	102144639	chr14	102144580	+	FALSE	hs|14q32.31				chr14:102144580-102144639	GO:0003735|GO:0015934|GO:0006412
A_24_P58565	0.00868903	1.78403	0.835141	1.78403	up	-2.84247	-1.50714	2.84247	down	-5.07105	-2.34228	5.07105	down	37.1789	37.2956	34.6314	32.7242	27.4218	39.9171	327.853	47.5078	44.5983	0.343539	0	-1.15769	-0.685409	-0.906808	-1.72736	1.66879	1.20207	0.836419		PREDICTED: Homo sapiens hypothetical LOC100128750 (LOC100128750), partial miscRNA [XR_110873]	30240103	chr8	30240044	-	FALSE	hs|8p12		XR_110873		chr8:30240103-30240044		XR_110873
A_24_P759584	0.00964872	1.94195	0.957507	1.94195	up	-1.78526	-0.836132	1.78526	down	-3.46688	-1.79364	3.46688	down	25.0059	22.9835	26.5227	21.3261	20.8888	23.3418	246.812	34.8845	32.2344	0.516383	-0.528882	0	-1.50704	-0.581627	-0.796352	0.541462	1.26455	0.689889	DIO3OS	Homo sapiens DIO3 opposite strand (non-protein coding) (DIO3OS), non-coding RNA [NR_002770]	102018622	chr14	102018563	-	FALSE	hs|14q32.31	64150	NR_002770	DIO3 opposite strand (non-protein coding)	chr14:102018622-102018563		NR_002770	Hs.660271
A_23_P67847	0.000302004	-1.74923	-0.806724	1.74923	down	1.36372	0.44755	1.36372	up	2.38547	1.25427	2.38547	up	779.506	1143.9	1637.42	2023.04	2240.73	2049.5	1378.95	843.784	970.852	-0.299937	0	0.198418	0.628462	0.92653	0.763661	-0.445356	-0.468143	-0.530671	GALNT14	Homo sapiens UDP-N-acetyl-alpha-D-galactosamine:polypeptide N-acetylgalactosaminyltransferase 14 (GalNAc-T14) (GALNT14), mRNA [NM_024572]	31133429	chr2	31133370	-	FALSE	hs|2p23.1	79623	NM_024572	UDP-N-acetyl-alpha-D-galactosamine:polypeptide N-acetylgalactosaminyltransferase 14 (GalNAc-T14)	chr2:31133429-31133370	GO:0004653|GO:0005794|GO:0016020|GO:0000139|GO:0016757|GO:0005529|GO:0016021	NM_024572	Hs.468058
A_23_P95972	0.00672374	-1.35127	-0.434315	1.35127	down	-2.64504	-1.40329	2.64504	down	-1.95745	-0.968976	1.95745	down	124.784	165.987	356.629	144.712	271.393	323.084	474.78	214.352	192.127	-0.437824	-0.961278	0.0508146	-0.0170957	0	-0.0282458	1.17393	0.583963	1.10369	TXNL4B	Homo sapiens thioredoxin-like 4B (TXNL4B), transcript variant 1, mRNA [NM_017853]	72119344	chr16	72119285	-	FALSE	hs|16q22.2	54957	NM_017853	thioredoxin-like 4B	chr16:72119344-72119285	GO:0008380|GO:0006397|GO:0007067|GO:0007049|GO:0005681|GO:0005634	NM_017853	Hs.134406
A_24_P287683	0.0057021	-1.03369	-0.0478007	1.03369	down	1.29563	0.373653	1.29563	up	1.33928	0.421453	1.33928	up	3070.02	2769.36	3607.68	3458.51	3186.84	4722.78	3458.62	2750.17	3273.39	-0.0897847	0.122529	0.0516908	0	0.0884409	0.139397	-0.492536	-0.228665	-0.315323	AP3S2	Homo sapiens adaptor-related protein complex 3, sigma 2 subunit (AP3S2), transcript variant 1, mRNA [NM_005829]	90377599	chr15	90377540	-	FALSE	hs|15q26.1	10239	NM_005829	adaptor-related protein complex 3, sigma 2 subunit	chr15:90377599-90377540	GO:0005794|GO:0016020|GO:0008565|GO:0031410|GO:0016192|GO:0006886|GO:0030659|GO:0030117	NM_005829	Hs.632161
A_24_P916496	0.00106643	1.16061	0.21488	1.16061	up	1.90413	0.929132	1.90413	up	1.64063	0.714252	1.64063	up	2705.22	2407.24	4374.72	3455.04	3341.87	4191.28	3008.05	1836.85	2218.05	0.082652	0.0118941	0.326642	-0.255701	0	0.0322504	-0.696086	-0.686145	-0.983977	PRKCA	Homo sapiens protein kinase C, alpha (PRKCA), mRNA [NM_002737]	64806829	chr17	64806770	+	FALSE	hs|17q24.2	5578	NM_002737	protein kinase C, alpha	chr17:64806770-64806829	GO:0005515|GO:0008624|GO:0005886|GO:0005783|GO:0007268|GO:0005634|GO:0007202|GO:0046872|GO:0005829|GO:0035556|GO:0005737|GO:0000166|GO:0070555|GO:0048011|GO:0016070|GO:0035408|GO:0016071|GO:0005624|GO:0030168|GO:0005524|GO:0035403|GO:0043536|GO:0006112|GO:0050796|GO:0004674|GO:0007596|GO:0005654|GO:0008270|GO:0004697|GO:0019899	NM_002737	Hs.531704
A_24_P355816	0.000194535	-4.76964	-2.25388	4.76964	down	-1.13749	-0.18585	1.13749	down	4.19314	2.06803	4.19314	up	619.5	613.297	882.898	1219.56	1169.91	2002.82	1098.28	696.621	864.581	-0.409102	-0.0598278	-0.366017	1.62969	1.96362	2.33338	-0.488314	0	0.210917	DRAM1	Homo sapiens DNA-damage regulated autophagy modulator 1 (DRAM1), mRNA [NM_018370]	102317387	chr12	102317328	+	FALSE	hs|12q23.2	55332	NM_018370	DNA-damage regulated autophagy modulator 1	chr12:102317328-102317387	GO:0016020|GO:0006914|GO:0006915|GO:0016021|GO:0005765	NM_018370	Hs.730859
A_23_P30126	0.0010001	1.31185	0.391604	1.31185	up	-2.6991	-1.43248	2.6991	down	-3.54082	-1.82408	3.54082	down	33.7185	39.1362	43.8989	30.9379	34.6994	47.4792	175.648	41.4179	27.838	0.45111	-0.303888	0	-0.664232	-0.0906358	-0.272723	1.79014	1.40301	1.2515	FGFBP1	Homo sapiens fibroblast growth factor binding protein 1 (FGFBP1), mRNA [NM_005130]	15937391	chr4	15937332	-	FALSE	hs|4p15.32	9982	NM_005130	fibroblast growth factor binding protein 1	chr4:15937391-15937332	GO:0005515|GO:0007165|GO:0008284|GO:0008285|GO:0045743|GO:0009986|GO:0005886|GO:0017134|GO:0007267|GO:0005576|GO:0008201|GO:0005615	NM_005130	Hs.1690
A_23_P398044	0.00446009	1.06519	0.0911119	1.06519	up	1.2757	0.351293	1.2757	up	1.19763	0.260182	1.19763	up	1227.54	1645.33	1977.67	1964.22	1660.09	1913.25	1837.58	1143.6	1383.18	0.0675811	0.0631372	0.131029	-0.0994587	0	0.0878706	-0.174164	-0.366947	-0.251021	CCDC97	Homo sapiens coiled-coil domain containing 97 (CCDC97), mRNA [NM_052848]	41830752	chr19	41830693	+	FALSE	hs|19q13.2	90324	NM_052848	coiled-coil domain containing 97	chr19:41830693-41830752		NM_052848	Hs.437497
A_32_P145302	0.00898315	-1.57716	-0.657327	1.57716	down	-2.89794	-1.53503	2.89794	down	-1.83745	-0.877702	1.83745	down	90.1391	84.7732	161.959	104.393	105.064	233.962	291.022	162.583	200.882	-1.2647	-0.83098	-0.188371	0	-0.492016	0.17995	0.631153	0.651357	1.03853			150589193	chr1	150589134	-	FALSE	hs|1q21.3				chr1:150589193-150589134
A_23_P99465	0.00991618	-1.11463	-0.156564	1.11463	down	1.72988	0.790671	1.72988	up	1.92817	0.947235	1.92817	up	325.365	272.278	583.643	691.829	614.604	392.505	429.238	347.732	391.391	-0.251673	0.0830536	0.14608	0	0.209089	0.238063	-1.2344	-0.50037	-0.659787	UFM1	Homo sapiens ubiquitin-fold modifier 1 (UFM1), mRNA [NM_016617]	38935123	chr13	38935064	+	FALSE	hs|13q13.3	51569	NM_016617	ubiquitin-fold modifier 1	chr13:38935064-38935123	GO:0005515|GO:0005737|GO:0071569|GO:0005634	NM_016617	Hs.727566
A_24_P230466	0.00613166	-2.05788	-1.04116	2.05788	down	-1.49465	-0.579807	1.49465	down	1.37683	0.461353	1.37683	up	1813.47	3344.46	4509.2	3065.28	4310.98	3832.22	2198.19	2492.8	2092.49	-0.347077	-0.352196	-0.574109	0.331025	0.647689	0.871386	0.505621	-0.0395806	0			238655566	chr1	238655507	+	FALSE	hs|1q43				chr1:238655507-238655566
A_23_P119916	4.83151e-05	-1.01939	-0.0277038	1.01939	down	2.04943	1.03522	2.04943	up	2.08917	1.06293	2.08917	up	273.873	481.421	560.839	628.895	550.929	453.591	369.219	208.81	175.047	-0.217489	0.0212049	0.180741	0.0050993	0	0.062469	-1.04818	-1.05078	-1.02225	WNT6	Homo sapiens wingless-type MMTV integration site family, member 6 (WNT6), mRNA [NM_006522]	219738911	chr2	219738852	+	FALSE	hs|2q35	7475	NM_006522	wingless-type MMTV integration site family, member 6	chr2:219738852-219738911	GO:0060684|GO:0001658|GO:0001664|GO:0009798|GO:0005886|GO:0071300|GO:0070172|GO:0005578|GO:0007267|GO:0005576|GO:0007275|GO:0072079|GO:0009952|GO:0005615|GO:0061303|GO:0010628|GO:0072080|GO:0030182|GO:0042475|GO:0048754|GO:0060070	NM_006522	Hs.29764
A_24_P676216	0.00602933	1.1764	0.234378	1.1764	up	1.76261	0.817712	1.76261	up	1.49831	0.583334	1.49831	up	451.075	758.664	1776.8	1338.77	1642.71	959.637	629.244	487.738	525.28	0.435924	0.236862	0	0.0090943	-0.0598725	0.0204305	-0.896199	-0.432083	-0.452068			135160711	chrX	135160652	+	FALSE	hs|Xq26.3				chrX:135160652-135160711
A_23_P151595	0.00513632	-1.09539	-0.131441	1.09539	down	1.41023	0.495935	1.41023	up	1.54475	0.627376	1.54475	up	104.913	110.709	376.797	358.482	390.031	308.882	222.084	85.7381	72.008	0.0213341	0.213796	-0.103962	0.135604	0	0.389887	-0.390953	-0.453358	-0.512326	CPNE6	Homo sapiens copine VI (neuronal) (CPNE6), mRNA [NM_006032]	24547222	chr14	24547163	+	FALSE	hs|14q11.2	9362	NM_006032	copine VI (neuronal)	chr14:24547163-24547222	GO:0006629|GO:0030424|GO:0005215|GO:0005509|GO:0001786|GO:0007268|GO:0005624|GO:0016192|GO:0030425|GO:0007399	NM_006032	Hs.6132
A_23_P212025	0.00903292	-1.10971	-0.150185	1.10971	down	-1.4482	-0.53426	1.4482	down	-1.30502	-0.384075	1.30502	down	1442.24	1649.79	2237.72	1275.23	1894.09	2515.31	1972.85	1674.18	1862.45	-0.152285	-0.126781	-0.141638	0	0.125469	-0.0956182	0.606529	0.171232	0.404314	ZBTB38	Homo sapiens zinc finger and BTB domain containing 38 (ZBTB38), mRNA [NM_001080412]	141164515	chr3	141164456	+	FALSE	hs|3q23	253461	NM_001080412	zinc finger and BTB domain containing 38	chr3:141164456-141164515	GO:0005622|GO:0003700|GO:0045944|GO:0005730|GO:0008270|GO:0005634|GO:0003677|GO:0046872|GO:0006351	NM_001080412	Hs.730645
A_23_P7101	0.00163983	1.29288	0.370588	1.29288	up	-1.21668	-0.282946	1.21668	down	-1.57302	-0.653534	1.57302	down	3772.09	4391.17	5841.6	3350.14	4164.07	4921.3	4083.15	3956.35	4211.61	0.0711288	0	-0.139072	-0.230632	-0.39309	-0.555984	0.224661	0.213046	0.343189	SLBP	Homo sapiens stem-loop binding protein (SLBP), mRNA [NM_006527]	1695032	chr4	1694973	-	FALSE	hs|4p16.3	7884	NM_006527	stem-loop binding protein	chr4:1695032-1694973	GO:0005515|GO:0006397|GO:0006369|GO:0010467|GO:0006398|GO:0033261|GO:0006366|GO:0008334|GO:0033260|GO:0005634|GO:0003729|GO:0005829|GO:0005737|GO:0006406|GO:0030529|GO:0005654|GO:0071204|GO:0051028|GO:0071207|GO:0071208	NM_006527	Hs.298345
A_24_P179033	0.0031052	1.03276	0.0465034	1.03276	up	1.32484	0.405815	1.32484	up	1.28281	0.359311	1.28281	up	936.364	2004.81	3059.41	2021.05	2821.3	2266.14	1030.58	978.811	1038.46	0	0.180482	0.115802	0.0247135	-0.00433081	0.136391	-0.430204	-0.25001	-0.240946		Q3TXS9_MOUSE (Q3TXS9) Osteoclast-like cell cDNA, RIKEN full-length enriched library, clone:I420002J17 product:ribosomal protein S2, full insert sequence, partial (79%) [THC2597403]	35497926	chr17	35497867	-	FALSE	hs|17q12				chr17:035497926-035497867
A_24_P224469	0.00515938	1.45823	0.544214	1.45823	up	-1.60474	-0.682337	1.60474	down	-2.34007	-1.22655	2.34007	down	23.8411	20.1997	77.901	25.449	13.2683	10.7491	360.302	12.1082	18.9484	0	-0.438199	0.286341	-0.327867	-0.768261	-0.688372	0.871536	0.438679	0.584939	TRPV3	Homo sapiens transient receptor potential cation channel, subfamily V, member 3 (TRPV3), mRNA [NM_145068]	3419753	chr17	3417910	-	FALSE	hs|17p13.2	162514	NM_145068	transient receptor potential cation channel, subfamily V, member 3	chr17:3419753-3417910	GO:0009266|GO:0005262|GO:0016020|GO:0016021|GO:0006811	NM_145068	Hs.446255
A_24_P272381	0.00053979	-1.63185	-0.706505	1.63185	down	-2.4839	-1.31261	2.4839	down	-1.52214	-0.606102	1.52214	down	25.6555	22.0283	36.8566	27.7599	32.0852	34.098	421.665	27.7989	19.8037	-0.454676	-0.793885	-0.606046	0.271975	-0.00706628	0	0.610592	0.97148	0.501144							FALSE
A_23_P111260	0.00298844	-2.40731	-1.26742	2.40731	down	-1.10882	-0.14903	1.10882	down	2.17105	1.11839	2.17105	up	303.691	469.955	713.354	396.548	572.088	725.924	452.434	469.35	349.648	-0.349849	-0.277847	0	0.874434	1.00659	1.29355	0.393504	-0.198512	-0.3756	NT5E	Homo sapiens 5'-nucleotidase, ecto (CD73) (NT5E), transcript variant 1, mRNA [NM_002526]	86201814	chr6	86201755	+	FALSE	hs|6q14.3	4907	NM_002526	5'-nucleotidase, ecto (CD73)	chr6:86201755-86201814	GO:0005886|GO:0016788|GO:0005624|GO:0055086|GO:0046086|GO:0031225|GO:0006259|GO:0009166|GO:0046872|GO:0008198|GO:0006196|GO:0046135|GO:0005737|GO:0006195|GO:0000166|GO:0006144|GO:0050728|GO:0008253|GO:0006206|GO:0006164	NM_002526	Hs.153952
A_23_P42163	0.00336536	-1.71146	-0.775232	1.71146	down	-1.28897	-0.366218	1.28897	down	1.32778	0.409014	1.32778	up	838.977	1023.05	1663.39	925.706	1523.92	2081.65	1105.88	1038.29	1006.82	-0.529017	-0.514055	-0.0634937	0.382484	0.410682	0.425962	0.0911828	-0.0990963	0	RPL7L1	Homo sapiens ribosomal protein L7-like 1 (RPL7L1), mRNA [NM_198486]	42852410	chr6	42852351	+	FALSE	hs|6p21.1	285855	NM_198486	ribosomal protein L7-like 1	chr6:42852351-42852410	GO:0005622|GO:0005515|GO:0003735|GO:0015934|GO:0006412	NM_198486	Hs.520133
A_24_P943205	0.00811499	1.71538	0.778527	1.71538	up	-2.52307	-1.33518	2.52307	down	-4.32801	-2.1137	4.32801	down	37.4457	40.9029	27.6477	38.7223	27.5554	29.8063	213.223	31.4778	43.9763	0.530003	0	-1.11502	-0.925833	-0.85325	-1.14152	1.50347	0.769673	1.14737	EPSTI1	epithelial stromal interaction 1 (breast) [Source:HGNC Symbol;Acc:16465] [ENST00000313624]	43460844	chr13	43460785	-	FALSE	hs|13q14.11	94240	AL831953	epithelial stromal interaction 1 (breast)	chr13:43460844-43460785			Hs.546467
A_24_P230100	0.0064061	-1.37113	-0.455367	1.37113	down	1.18942	0.250255	1.18942	up	1.63085	0.705622	1.63085	up	184.566	154.132	680.234	737.938	742.845	459.97	539.03	164.179	201.736	-0.164558	0	0.301475	0.322933	0.670881	0.509206	-0.165143	-0.239397	-0.209307			80277396	chr17	80277337	-	FALSE	hs|17q25.3				chr17:080277396-080277337
A_24_P337657	0.00315148	1.16943	0.225802	1.16943	up	-1.51174	-0.596215	1.51174	down	-1.76788	-0.822016	1.76788	down	144.081	173.767	263.012	90.2292	181.679	358.62	261.55	175.095	178.006	-0.0270624	0.312929	-0.0267623	-0.310487	-0.107814	0	0.880436	0.599516	0.567796	SRF	Homo sapiens serum response factor (c-fos serum response element-binding transcription factor) (SRF), mRNA [NM_003131]	43148344	chr6	43148285	+	FALSE	hs|6p21.1	6722	NM_003131	serum response factor (c-fos serum response element-binding transcription factor)	chr6:43148285-43148344	GO:0005515|GO:0000790|GO:0003700|GO:0007369|GO:0008285|GO:0006366|GO:0005783|GO:0045597|GO:0002042|GO:0010736|GO:0051491|GO:0010735|GO:0005634|GO:0060261|GO:0030155|GO:0046716|GO:0042803|GO:0001947|GO:0007507|GO:0005737|GO:0048589|GO:0048666|GO:0045987|GO:0045944|GO:0007015|GO:0009725|GO:0034097|GO:0030336|GO:0001569|GO:0001707|GO:0051150|GO:0007616|GO:0090009|GO:0060055|GO:0005730|GO:0009636|GO:…	NM_003131	Hs.520140
A_23_P355244	0.00679786	-3.01637	-1.59281	3.01637	down	1.12578	0.17092	1.12578	up	3.39575	1.76373	3.39575	up	118.775	158.7	201.434	242.346	213.574	273.516	222.766	121.744	148.141	-0.431261	-1.01773	0	1.26374	1.23064	0.835074	-1.07486	0.0176883	-0.904578	SAMD9	Homo sapiens sterile alpha motif domain containing 9 (SAMD9), transcript variant 1, mRNA [NM_017654]	92728938	chr7	92728879	-	FALSE	hs|7q21.2	54809	NM_017654	sterile alpha motif domain containing 9	chr7:92728938-92728879	GO:0005737	NM_017654	Hs.65641
A_24_P171549	0.00652489	1.27334	0.348617	1.27334	up	-1.60154	-0.679459	1.60154	down	-2.0393	-1.02808	2.0393	down	548.421	603.887	972.074	493.685	598.063	923.346	924.527	708.752	696.079	0	-0.241244	0.0550546	-0.10299	-0.309385	-0.819664	0.593877	0.793788	0.464523	CDCA7	Homo sapiens cell division cycle associated 7 (CDCA7), transcript variant 1, mRNA [NM_031942]	174232952	chr2	174232893	+	FALSE	hs|2q31.1	83879	NM_031942	cell division cycle associated 7	chr2:174232893-174232952	GO:0006355|GO:0042127|GO:0005634	NM_031942	Hs.470654
DCP_1_0	0.00821155	-1.76815	-0.822238	1.76815	down	-1.36462	-0.448498	1.36462	down	1.29571	0.373739	1.29571	up	2189.92	2315.1	3119.67	3553.58	2795.63	3993.64	3433.45	2123.65	2198.53	-0.169937	-0.725322	-0.485749	0.221024	0.613265	0.251416	-0.0741806	0	0.0386677		Unknown					pos
A_23_P216517	0.00464871	1.04574	0.0645305	1.04574	up	1.45428	0.540302	1.45428	up	1.39066	0.475772	1.39066	up	181.975	186.059	229.993	212.601	216.412	256.223	272.726	164.946	214.789	0.288888	0.186909	0	0.0955071	0.248768	-0.0620695	-0.409028	-0.446457	-0.289623	C9orf100	Homo sapiens chromosome 9 open reading frame 100 (C9orf100), mRNA [NM_032818]	35661905	chr9	35661846	-	FALSE	hs|9p13.3	84904	NM_032818	chromosome 9 open reading frame 100	chr9:35661905-35661846	GO:0005622|GO:0005085|GO:0035023|GO:0005089	NM_032818	Hs.534579
A_23_P103877	0.00303725	-4.94377	-2.30561	4.94377	down	-1.35916	-0.442718	1.35916	down	3.63736	1.86289	3.63736	up	285.75	343.4	457.364	473.381	550.899	654.842	502.834	305.759	312.526	0	-1.32858	-0.513916	1.3722	1.73518	1.96695	0.253478	-0.0899193	-0.677902	LRRC38	Homo sapiens leucine rich repeat containing 38 (LRRC38), mRNA [NM_001010847]	13801828	chr1	13801769	-	FALSE	hs|1p36.21	126755	NM_001010847	leucine rich repeat containing 38	chr1:13801828-13801769	GO:0016020|GO:0016021	NM_001010847	Hs.657356
A_23_P502363	0.0008462	2.86255	1.5173	2.86255	up	-1.23135	-0.300246	1.23135	down	-3.52482	-1.81755	3.52482	down	141.886	153.734	203.066	101.946	101.585	183.915	270.402	219.09	207.153	0	0.216193	0.0923423	-1.55733	-1.63814	-1.0479	-0.00282434	0.850519	0.36158	EYA1	Homo sapiens eyes absent homolog 1 (Drosophila) (EYA1), transcript variant 3, mRNA [NM_000503]	72110075	chr8	72110016	-	FALSE	hs|8q13.3	2138	NM_000503	eyes absent homolog 1 (Drosophila)	chr8:72110075-72110016	GO:0006355|GO:0016576|GO:0007605|GO:0016925|GO:0005634|GO:0007275|GO:0045739|GO:0009653|GO:0046872|GO:0035335|GO:0006302|GO:0005737|GO:0016787|GO:0010212|GO:0004725|GO:0016568	NM_000503	Hs.491997
A_23_P165608	0.00686112	1.09608	0.132348	1.09608	up	1.38271	0.467496	1.38271	up	1.26151	0.335147	1.26151	up	252.664	272.39	430.294	315.853	340.552	445.58	624.643	226.442	259.847	0.145315	0.0514145	0.319787	-0.0653066	0	0.184779	-0.230734	-0.278986	-0.376249	SEMA4F	Homo sapiens sema domain, immunoglobulin domain (Ig), transmembrane domain (TM) and short cytoplasmic domain, (semaphorin) 4F (SEMA4F), mRNA [NM_004263]	74907805	chr2	74907746	+	FALSE	hs|2p13.1	10505	NM_004263	sema domain, immunoglobulin domain (Ig), transmembrane domain (TM) and short cytoplasmic domain, (semaphorin) 4F	chr2:74907746-74907805	GO:0031290|GO:0005886|GO:0005783|GO:0007267|GO:0045202|GO:0005624|GO:0007275|GO:0030154|GO:0007399|GO:0005887|GO:0007411|GO:0030517|GO:0045211|GO:0000299|GO:0004872|GO:0019717	NM_004263	Hs.25887
A_32_P108387	0.00441558	1.11553	0.157731	1.11553	up	1.94374	0.958833	1.94374	up	1.74243	0.801102	1.74243	up	151.933	122.618	194.913	502.23	270.612	204.497	393.434	168.145	233.361	0.254096	0.175948	0.0748207	0	-0.0821222	0.113795	-1.20178	-0.479878	-0.689974							FALSE
A_23_P67367	0.00968648	-1.06659	-0.0930063	1.06659	down	3.19493	1.67578	3.19493	up	3.40768	1.76879	3.40768	up	57.6495	83.8967	127.656	147.873	127.52	91.6654	140.54	48.0158	48.0061	-0.32491	0.0392146	0.223755	0	0.104688	0.112391	-0.775995	-2.45345	-1.85985	DHDH	Homo sapiens dihydrodiol dehydrogenase (dimeric) (DHDH), mRNA [NM_014475]	49448171	chr19	49448112	+	FALSE	hs|19q13.33	27294	NM_014475	dihydrodiol dehydrogenase (dimeric)	chr19:49448112-49448171	GO:0005975|GO:0005488|GO:0047837|GO:0047115|GO:0016491|GO:0008746|GO:0009055|GO:0005625|GO:0042843	NM_014475	Hs.631555
A_24_P349387	0.00348794	-1.09548	-0.131569	1.09548	down	1.34632	0.429025	1.34632	up	1.47488	0.560593	1.47488	up	36429.7	56662.5	66466.6	71417.6	63454.2	55390	37661.2	38868.2	38773.1	-0.132188	0	0.101993	0.218153	0.0270032	0.119355	-0.592722	-0.288363	-0.436183			37059474	chr6	37059415	+	FALSE	hs|6p21.2				chr6:37059415-37059474
A_32_P183047	0.00708717	1.7797	0.831631	1.7797	up	-2.41645	-1.27289	2.41645	down	-4.30054	-2.10452	4.30054	down	41.1611	34.3214	39.9849	48.8058	34.4068	32.8234	389.866	53.9026	47.6545	0	0.0384201	-0.229352	-1.4585	-0.195297	-1.03203	1.64613	1.46436	0.517236			39370839	chr5	39370780	-	FALSE	hs|5p13.1				chr5:039370839-039370780
A_32_P127454	0.00848931	1.40981	0.495496	1.40981	up	1.92769	0.946877	1.92769	up	1.36735	0.451381	1.36735	up	469.463	386.263	570.078	906.913	646.901	556.8	773.577	483.228	647.04	0.412354	0.849997	0.392588	-0.0286674	0	0.197118	-0.731627	-0.152103	-0.301961							FALSE
A_24_P319923	0.00522056	-1.6889	-0.756085	1.6889	down	-1.11771	-0.160547	1.11771	down	1.51104	0.595538	1.51104	up	199.552	213.338	275.525	387.154	332.325	406.581	452.056	236.902	302.581	-0.0602837	-0.22735	-0.121723	0.355904	0.699165	0.803827	-0.157347	0	0.229631	MYLK	Homo sapiens myosin light chain kinase (MYLK), transcript variant 1, mRNA [NM_053025]	123331220	chr3	123331161	-	FALSE	hs|3q21.1	4638	NM_053025	myosin light chain kinase	chr3:123331220-123331161	GO:0005515|GO:0005516|GO:0006936|GO:0060414|GO:0000166|GO:0016301|GO:0004687|GO:0006468|GO:0003779|GO:0005524|GO:0046872|GO:0005829	NM_053025	Hs.477375
A_23_P203577	1.89425e-05	1.15259	0.204874	1.15259	up	1.12711	0.172628	1.12711	up	-1.0226	-0.0322456	1.0226	down	101469	119991	116164	142161	120919	135494	108683	85759.6	115094	0.173491	0.193743	0.174084	-0.0250663	-0.0130596	-0.035179	-0.0146636	0.0380954	0	RPL27A	Homo sapiens ribosomal protein L27a (RPL27A), mRNA [NM_000990]	8707326	chr11	8707267	+	FALSE	hs|11p15.4	6157	NM_000990	ribosomal protein L27a	chr11:8707267-8707326	GO:0005515|GO:0010467|GO:0003735|GO:0003723|GO:0019083|GO:0019058|GO:0006415|GO:0006412|GO:0005829|GO:0006414|GO:0005622|GO:0031018|GO:0005840|GO:0016032|GO:0022625|GO:0044267	NM_000990	Hs.523463
A_23_P70998	0.00726134	-1.02411	-0.0343637	1.02411	down	1.38888	0.473917	1.38888	up	1.42235	0.508281	1.42235	up	700.446	716.983	1780.05	1127.7	1540.06	1533.1	836.172	617.078	610.252	0.0602531	0	-0.0219869	0.0195284	0.0150547	0.106774	-0.643053	-0.200419	-0.540013	LOC729852	Homo sapiens hypothetical LOC729852 (LOC729852), non-coding RNA [NR_034084]	7918778	chr7	7918719	+	FALSE	hs|7p21.3	729852	NR_034084	hypothetical LOC729852	chr7:7918719-7918778		NR_034084	Hs.652371
A_23_P253434	0.00330137	-1.44081	-0.526882	1.44081	down	-1.00599	-0.00861833	1.00599	down	1.43223	0.518264	1.43223	up	607.059	634.958	1224.43	994.255	1073.4	1266.1	967.89	669.621	772.043	-0.233478	-0.102031	0.178236	0.50678	0.491302	0.425293	-0.0498525	-0.0815648	0	FNDC3B	Homo sapiens fibronectin type III domain containing 3B (FNDC3B), transcript variant 1, mRNA [NM_022763]	172116199	chr3	172116140	+	FALSE	hs|3q26.31	64778	NM_022763	fibronectin type III domain containing 3B	chr3:172116140-172116199	GO:0016020|GO:0005783|GO:0045600|GO:0016021	NM_022763	Hs.159430
A_24_P238266	0.00962284	1.16438	0.219566	1.16438	up	1.39226	0.477427	1.39226	up	1.1957	0.257861	1.1957	up	6779.37	12615.8	16751.2	10714.7	13542.5	11933.5	5685	6492.27	6675.12	0.186099	0.256721	0.23021	0.13867	0	-0.124337	-0.42033	-0.0874682	-0.251453			84760538	chr5	84760477	+	FALSE	hs|5q14.3				chr5:084760477-084760538
A_23_P251841	0.0081351	-3.13832	-1.64999	3.13832	down	-1.0621	-0.0869252	1.0621	down	2.95481	1.56307	2.95481	up	28.1837	32.5638	36.6154	75.4418	58.2267	55.3209	90.255	28.9048	27.1054	-0.09796	-0.910994	-0.0292016	1.64429	1.12261	1.14492	0	-0.911438	0.134058	NRXN3	Homo sapiens neurexin 3 (NRXN3), transcript variant 1, mRNA [NM_004796]	80328679	chr14	80328620	+	FALSE	hs|14q31.1	9369	NM_004796	neurexin 3	chr14:80328620-80328679	GO:0016020|GO:0007411|GO:0005887|GO:0004872|GO:0016021|GO:0001525|GO:0007155|GO:0046872	NM_004796	Hs.368307
DCP_22_0	0.00960933	-1.7757	-0.828388	1.7757	down	-1.02363	-0.0336958	1.02363	down	1.73471	0.794692	1.73471	up	6188.86	5465.88	7394.39	12543.8	10749.8	11137.4	6594.06	5319.21	6385.94	-0.0716591	-0.267295	-0.11366	0.641276	0.956964	0.434309	-0.472195	0	0.120668		Unknown					pos
A_23_P206310	0.00678033	-1.59697	-0.675338	1.59697	down	1.62179	0.697591	1.62179	up	2.58996	1.37293	2.58996	up	241.898	357.185	617.001	554.929	551.738	584.43	435.158	271.841	282.52	-0.603367	0	0.502491	0.598589	0.624098	0.702453	-0.58909	-0.875831	-0.728727	KIAA0513	Homo sapiens KIAA0513 (KIAA0513), mRNA [NM_014732]	85127698	chr16	85127639	+	FALSE	hs|16q24.1	9764	NM_014732	KIAA0513	chr16:85127639-85127698	GO:0005737	NM_014732	Hs.301658
A_24_P116700	0.00331822	1.13096	0.177544	1.13096	up	1.80889	0.855107	1.80889	up	1.59944	0.677563	1.59944	up	104.117	119.003	181.107	137.847	138.795	153.19	322.518	76.4028	98.3203	0.15595	0.130219	0.339604	-0.0316153	0.124756	0	-0.982654	-0.528215	-0.428679	TMEM220	Homo sapiens transmembrane protein 220 (TMEM220), mRNA [NM_001004313]	10629530	chr17	10628402	-	FALSE	hs|17p13.1	388335	NM_001004313	transmembrane protein 220	chr17:10629530-10628402	GO:0016020|GO:0016021	NM_001004313	Hs.462230
A_23_P68505	0.00794268	-1.02176	-0.0310546	1.02176	down	1.56868	0.64955	1.56868	up	1.60281	0.680604	1.60281	up	1184.45	1342.03	2107.25	1863.44	1876.36	2200.38	1673.97	1055.57	1158.87	-0.218152	0.00174707	0.271785	0.0375558	0	0.110988	-0.562357	-0.456932	-0.87398	C20orf177	Homo sapiens chromosome 20 open reading frame 177 (C20orf177), transcript variant 2, mRNA [NM_001190826]	58523027	chr20	58522968	+	FALSE	hs|20q13.33	63939	NM_001190826	chromosome 20 open reading frame 177	chr20:58522968-58523027		NM_001190826	Hs.54973
A_32_P217261	0.000331095	-2.50042	-1.32217	2.50042	down	1.73543	0.795293	1.73543	up	4.33931	2.11746	4.33931	up	287.279	334.413	394.008	492.351	398.044	553.478	623.512	267.401	396.899	0	-0.207228	0.459373	1.15427	1.59297	1.47142	-0.47214	-0.619808	-1.04179	LOC100509498	PREDICTED: Homo sapiens hypothetical LOC100509498 (LOC100509498), partial miscRNA [XR_111605]	80631917	chr16	80631858	-	FALSE	hs|16q23.2	100509498	XR_111605	hypothetical LOC100509498	chr16:80631917-80631858		XR_111605	Hs.60257
A_32_P153892	0.00652689	1.15321	0.205655	1.15321	up	1.41556	0.501371	1.41556	up	1.22749	0.295716	1.22749	up	1134.59	937.758	1255.8	1487.79	1211.16	1380.05	1883.61	856.546	1464.62	0.296664	0.362076	-0.0121144	0	0.00564098	0.0240193	-0.349786	-0.278967	-0.228734	TAF3	Homo sapiens TAF3 RNA polymerase II, TATA box binding protein (TBP)-associated factor, 140kDa (TAF3), mRNA [NM_031923]	8007273	chr10	8007214	+	FALSE	hs|10p14	83860	NM_031923	TAF3 RNA polymerase II, TATA box binding protein (TBP)-associated factor, 140kDa	chr10:8007214-8007273	GO:0005515|GO:0006355|GO:0005669|GO:0051457|GO:0008270|GO:0005634|GO:0000122|GO:0046872|GO:0043433	NM_031923	Hs.527688
A_23_P73096	0.00654449	-1.23659	-0.306364	1.23659	down	1.22775	0.296021	1.22775	up	1.51822	0.602384	1.51822	up	729.517	841.324	1374.44	708.191	1019.75	1513.49	880.032	621.695	696.521	0	-0.245369	0.164259	0.266432	0.245409	0.32614	-0.478218	-0.263297	-0.227657			155100835	chr7	155100776	+	FALSE	hs|7q36.3				chr7:155100776-155100835
A_23_P316064	0.00132257	1.06207	0.0868842	1.06207	up	3.48522	1.80125	3.48522	up	3.28153	1.71437	3.28153	up	68.9242	49.8788	76.1448	142.496	105.733	69.0456	94.7317	32.914	49.0684	0.561359	0.0721063	0	0.303594	0.112687	-0.0434675	-2.08909	-1.07331	-1.60789	ZACN	Homo sapiens zinc activated ligand-gated ion channel (ZACN), mRNA [NM_180990]	74077439	chr17	74077380	+	FALSE	hs|17q25.1	353174	NM_180990	zinc activated ligand-gated ion channel	chr17:74077380-74077439	GO:0005230|GO:0005886|GO:0045211|GO:0005624|GO:0008270|GO:0004872|GO:0016021|GO:0010043|GO:0005216|GO:0006811	NM_180990	Hs.714919
A_23_P151649	0.00170761	1.06498	0.0908279	1.06498	up	-1.4378	-0.523863	1.4378	down	-1.53123	-0.614691	1.53123	down	3883.08	4263.59	6477.52	4139.85	4784.55	6755.58	5315.43	3795.38	4853.15	0.152182	-0.202767	0	-0.0768405	-0.0653075	-0.180922	0.584096	0.400554	0.536354	APEX1	Homo sapiens APEX nuclease (multifunctional DNA repair enzyme) 1 (APEX1), transcript variant 3, mRNA [NM_080649]	20925561	chr14	20925502	+	FALSE	hs|14q11.2	328	NM_080649	APEX nuclease (multifunctional DNA repair enzyme) 1	chr14:20925502-20925561	GO:0005515|GO:0004844|GO:0003906|GO:0048471|GO:0008408|GO:0016890|GO:0005783|GO:0003723|GO:0005634|GO:0045739|GO:0046872|GO:0005622|GO:0005739|GO:0005737|GO:0004528|GO:0004523|GO:0080111|GO:0043488|GO:0008081|GO:0005813|GO:0006355|GO:0003714|GO:0003713|GO:0004520|GO:0005730|GO:0006310|GO:0045768|GO:0003677|GO:0031490|GO:0016829|GO:0003684|GO:0004519|GO:0006281|GO:0016787|GO:0016607|GO:0006284|GO:…	NM_080649	Hs.73722
A_32_P114574	0.00530546	1.08615	0.119229	1.08615	up	-1.15541	-0.208404	1.15541	down	-1.25495	-0.327633	1.25495	down	5631.55	6448.18	8241.46	6788.53	7017.32	8947.92	7167.85	5612.52	7799.24	0.0954278	0	-0.0301817	-0.0195044	-0.152752	-0.120185	0.125412	0.273845	0.2912	CACYBP	Homo sapiens calcyclin binding protein (CACYBP), transcript variant 1, mRNA [NM_014412]	174979174	chr1	174979115	+	FALSE	hs|1q25.1	27101	NM_014412	calcyclin binding protein	chr1:174979115-174979174	GO:0005515|GO:0043005|GO:0060416|GO:0007568|GO:0045740|GO:0030877|GO:0005625|GO:0005634|GO:0042803|GO:0044297|GO:0007507|GO:0005737|GO:0005641|GO:0071277|GO:0060548|GO:0055007	NM_014412	Hs.508524
A_24_P144620	0.00469877	-1.05998	-0.0840399	1.05998	down	-1.65874	-0.730085	1.65874	down	-1.56487	-0.646045	1.56487	down	99.6184	152.729	206.408	104.565	175.544	216.24	321.304	134.856	159.294	-0.214186	-0.342022	0	-0.232046	0.0426963	-0.114738	0.753982	0.319244	0.560822	C6orf35	Homo sapiens chromosome 6 open reading frame 35 (C6orf35), mRNA [NM_018452]	157743786	chr6	157739942	-	FALSE	hs|6q25.3	729515	NM_018452	chromosome 6 open reading frame 35	chr6:157743786-157739942	GO:0016020|GO:0016021	NM_018452	Hs.157212
A_32_P135818	0.00765882	-1.00587	-0.00844995	1.00587	down	-1.32739	-0.408597	1.32739	down	-1.31964	-0.400147	1.31964	down	43678.5	40842	51967.6	48654.1	50220.7	58959.4	53885.5	44424.2	55254.4	-0.035021	-0.0500833	0	0.174763	-0.114615	-0.119903	0.489502	0.371527	0.279659	RPS3A	Homo sapiens ribosomal protein S3A (RPS3A), mRNA [NM_001006]	152024126	chr4	152024067	+	FALSE	hs|4q31.3	6189	NM_001006	ribosomal protein S3A	chr4:152024067-152024126	GO:0005515|GO:0010467|GO:0003735|GO:0019083|GO:0003723|GO:0019058|GO:0005730|GO:0005634|GO:0006917|GO:0006415|GO:0006412|GO:0030154|GO:0006413|GO:0005829|GO:0006414|GO:0005622|GO:0005737|GO:0022627|GO:0031018|GO:0030529|GO:0016032|GO:0005840|GO:0044267	NM_001006	Hs.356572
A_24_P261417	0.00643721	-1.12559	-0.170681	1.12559	down	-1.2303	-0.299007	1.2303	down	-1.09302	-0.128326	1.09302	down	5192.35	5001.94	7580.37	5276.85	6393.36	9680.25	7904.17	5847.08	6989	-0.206548	-0.161343	-0.13639	0.0779667	0	-0.0702038	0.0923433	0.237104	0.0632933	DKK3	Homo sapiens dickkopf homolog 3 (Xenopus laevis) (DKK3), transcript variant 1, mRNA [NM_015881]	11984974	chr11	11984915	-	FALSE	hs|11p15.3	27122	NM_015881	dickkopf homolog 3 (Xenopus laevis)	chr11:11984974-11984915	GO:0030325|GO:2000065|GO:0007275|GO:0005576|GO:0090090|GO:0045892|GO:0009653|GO:0005615|GO:0032348	NM_015881	Hs.292156
A_23_P114445	0.00769588	-1.08256	-0.114449	1.08256	down	2.20838	1.14299	2.20838	up	2.3907	1.25743	2.3907	up	87.2637	103.786	146.708	197.088	190.619	135.06	204.73	91.2696	120.99	-0.0554199	0	0.727513	0.241331	0.224504	0.549605	-1.14062	-0.499024	-1.11722	MAGEE1	Homo sapiens melanoma antigen family E, 1 (MAGEE1), mRNA [NM_020932]	75651298	chrX	75651239	+	FALSE	hs|Xq13.3	57692	NM_020932	melanoma antigen family E, 1	chrX:75651239-75651298	GO:0008150|GO:0048471|GO:0005737|GO:0016010|GO:0005886|GO:0045211|GO:0005634|GO:0030425	NM_020932	Hs.8453
A_23_P115703	0.00127378	1.18317	0.242663	1.18317	up	-1.45507	-0.541085	1.45507	down	-1.7216	-0.783747	1.7216	down	705.685	670.196	1021.2	647.21	685.573	1098.31	1632.38	790.307	971.265	-0.210217	0	0.150745	-0.154194	-0.205092	-0.428175	0.595208	0.50691	0.461663	PCGF6	Homo sapiens polycomb group ring finger 6 (PCGF6), transcript variant 1, mRNA [NM_001011663]	105063057	chr10	105062998	-	FALSE	hs|10q24.33	84108	NM_001011663	polycomb group ring finger 6	chr10:105063057-105062998	GO:0031519|GO:0003700|GO:0008270|GO:0005634|GO:0045892|GO:0003677|GO:0046872|GO:0006351	NM_001011663	Hs.730825
A_23_P132595	0.00996125	1.09765	0.13442	1.09765	up	-1.46018	-0.546147	1.46018	down	-1.60277	-0.680567	1.60277	down	1041.16	1185.94	1677.47	830.299	1291.75	1489.85	1684.55	1181.48	1428.9	0.0527753	-0.218026	-0.0354709	-0.159313	0	-0.44467	0.620832	0.260167	0.55672	VGLL4	Homo sapiens vestigial like 4 (Drosophila) (VGLL4), transcript variant 2, mRNA [NM_014667]	11598018	chr3	11597959	-	FALSE	hs|3p25.3	9686	NM_014667	vestigial like 4 (Drosophila)	chr3:11598018-11597959	GO:0006355|GO:0005634	NM_014667	Hs.38032
A_24_P320254	0.0054018	1.01655	0.0236784	1.01655	up	-1.42801	-0.514006	1.42801	down	-1.45164	-0.537685	1.45164	down	8956.84	8137.88	13994.2	12069.1	11169.3	14257.6	13330.7	9264.74	11842.8	0.0777788	-0.317273	0	-0.00342363	-0.0749731	-0.232133	0.477208	0.420281	0.405035	HNRNPH1	Homo sapiens heterogeneous nuclear ribonucleoprotein H1 (H) (HNRNPH1), mRNA [NM_005520]	179041542	chr5	179041483	-	FALSE	hs|5q35.3	3187	NM_005520	heterogeneous nuclear ribonucleoprotein H1 (H)	chr5:179041542-179041483	GO:0005515|GO:0008380|GO:0006396|GO:0010467|GO:0003723|GO:0005730|GO:0005634|GO:0071013|GO:0015629|GO:0008266|GO:0005737|GO:0000166|GO:0000398|GO:0043484|GO:0005654|GO:0030530	NM_005520	Hs.604001
A_23_P303242	0.00249669	-2.42731	-1.27936	2.42731	down	-1.12344	-0.16792	1.12344	down	2.16061	1.11144	2.16061	up	8209.32	11443	16862.4	20536.5	20661.6	15978.3	10892.1	9102.37	10523.2	-0.0106251	-0.26181	-0.365075	0.728397	0.988344	1.48383	-0.280388	0	0.146638	MT1X	Homo sapiens metallothionein 1X (MT1X), mRNA [NM_005952]	56717957	chr16	56717898	+	FALSE	hs|16q13	4501	NM_005952	metallothionein 1X	chr16:56717898-56717957	GO:0010038|GO:0046872	NM_005952	Hs.374950
A_32_P66035	0.0095808	-1.02125	-0.0303366	1.02125	down	2.26753	1.18112	2.26753	up	2.31572	1.21146	2.31572	up	49.8918	42.3408	88.2328	68.3441	70.5565	67.3128	198.418	38.4282	32.5631	-0.0962811	0.3207	0.593223	0	0.800376	0.108275	-1.01934	-0.592894	-1.1135	TMEM86A	Homo sapiens transmembrane protein 86A (TMEM86A), mRNA [NM_153347]	18726147	chr11	18726088	+	FALSE	hs|11p15.1	144110	NM_153347	transmembrane protein 86A	chr11:18726088-18726147	GO:0016020|GO:0016021	NM_153347	Hs.502100
A_23_P91657	0.00229662	-1.04778	-0.0673364	1.04778	down	-1.55076	-0.632976	1.55076	down	-1.48004	-0.56564	1.48004	down	914.291	828.988	1660.76	797.969	1320	1892.83	1400.32	1146.52	1247.95	-0.00484654	0	-0.214095	0.040657	-0.0495596	-0.00802991	0.767975	0.380606	0.531406	EWSR1	Homo sapiens Ewing sarcoma breakpoint region 1 (EWSR1), transcript variant 1, mRNA [NM_013986]	29688581	chr22	29688522	+	FALSE	hs|22q12.2	2130	NM_013986	Ewing sarcoma breakpoint region 1	chr22:29688522-29688581	GO:0005622|GO:0005515|GO:0005516|GO:0006355|GO:0005737|GO:0005886|GO:0000166|GO:0003723|GO:0008270|GO:0005634|GO:0003676|GO:0046872	NM_013986	Hs.374477
A_24_P600603	0.00370753	1.06075	0.0850868	1.06075	up	1.41627	0.502095	1.41627	up	1.33516	0.417008	1.33516	up	2223.02	3321.67	4461.56	4744.63	4522.49	2950.67	2793.94	2399.4	2561.15	0	0.302367	0.215599	0.106061	0.159305	-0.00265986	-0.385779	-0.222334	-0.380204			179224999	chr1	179224940	+	FALSE	hs|1q25.2				chr1:179224940-179224999
A_23_P258136	0.00118395	-2.33634	-1.22425	2.33634	down	1.45333	0.539364	1.45333	up	3.39548	1.76362	3.39548	up	102.226	100.259	144.111	160.134	158.417	193.65	147.139	104.655	130.873	0.156462	-0.3919	0	1.04195	1.1885	1.20687	-1.13541	-0.3904	-0.32772	MXRA5	Homo sapiens matrix-remodelling associated 5 (MXRA5), mRNA [NM_015419]	3227328	chrX	3227269	-	FALSE	hs|Xp22.33	25878	NM_015419	matrix-remodelling associated 5	chrX:3227328-3227269	GO:0005576	NM_015419	Hs.369422
A_23_P134925	0.00586108	1.39792	0.483287	1.39792	up	-1.05854	-0.0820732	1.05854	down	-1.47976	-0.56536	1.47976	down	6839.87	6706.43	8871.63	5815.15	5724.54	9104.41	7755.38	5470.58	7310.24	0.201825	-0.0749768	0	-0.288138	-0.364799	-0.670073	0.106775	0.12776	0.138533	BNIP3L	Homo sapiens BCL2/adenovirus E1B 19kDa interacting protein 3-like (BNIP3L), mRNA [NM_004331]	26270345	chr8	26270286	+	FALSE	hs|8p21.2	665	NM_004331	BCL2/adenovirus E1B 19kDa interacting protein 3-like	chr8:26270286-26270345	GO:0005515|GO:0008634|GO:0043066|GO:0043065|GO:0046982|GO:0005783|GO:0035694|GO:0005634|GO:0005741|GO:0031224|GO:0005635|GO:0005740|GO:0006917|GO:0042803|GO:0042802|GO:0005739|GO:0051607|GO:0016020|GO:0044419|GO:0016021|GO:0005521	NM_004331	Hs.131226
A_23_P141606	0.00138405	1.00422	0.00607082	1.00422	up	-1.27593	-0.351553	1.27593	down	-1.28131	-0.357623	1.28131	down	5822.89	6101.13	7498.49	7183.41	6581.67	8305.88	8826.05	5998.58	8054.4	0.0502347	-0.0742815	-0.0918492	0	-0.0190534	-0.115055	0.381879	0.229417	0.327466	BLMH	Homo sapiens bleomycin hydrolase (BLMH), mRNA [NM_000386]	28575407	chr17	28575348	-	FALSE	hs|17q11.2	642	NM_000386	bleomycin hydrolase	chr17:28575407-28575348	GO:0005515|GO:0004197|GO:0005737|GO:0042493|GO:0004177|GO:0006508|GO:0004180|GO:0009636|GO:0008233|GO:0005634|GO:0005625|GO:0008234	NM_000386	Hs.371914
A_24_P924591	0.00133849	1.13949	0.188384	1.13949	up	-1.01391	-0.0199245	1.01391	down	-1.15533	-0.208308	1.15533	down	3598.44	2563.7	3425.24	3109.13	2744.14	4312.73	4735.82	3127.63	3998.29	0.0410117	0.0518301	0	-0.166059	-0.177242	-0.129008	-0.0119401	0.106059	0.0584964	VEZF1	Homo sapiens vascular endothelial zinc finger 1 (VEZF1), mRNA [NM_007146]	56049012	chr17	56048953	-	FALSE	hs|17q22	7716	NM_007146	vascular endothelial zinc finger 1	chr17:56049012-56048953	GO:0005622|GO:0006968|GO:0006366|GO:0006357|GO:0001885|GO:0005730|GO:0008270|GO:0005634|GO:0001525|GO:0003677|GO:0046872	NM_007146	Hs.463569
A_23_P108641	0.00596663	-1.11743	-0.160181	1.11743	down	-1.41422	-0.500003	1.41422	down	-1.2656	-0.339822	1.2656	down	3353.64	3441.06	5495.4	3787.9	4237.71	6160.55	5046.38	3993.23	5149.34	-0.274566	-0.283941	-0.0264578	0	0.0271406	-0.131563	0.403117	0.168882	0.343043	FAM136A	Homo sapiens family with sequence similarity 136, member A (FAM136A), mRNA [NM_032822]	70523227	chr2	70523168	-	FALSE	hs|2p13.3	84908	NM_032822	family with sequence similarity 136, member A	chr2:70523227-70523168	GO:0005739|GO:0005515|GO:0005737	NM_032822	Hs.516077
A_23_P117721	0.00269299	1.06056	0.0848319	1.06056	up	-1.29754	-0.375781	1.29754	down	-1.37613	-0.460613	1.37613	down	71934	92732.8	101895	94368.4	99317.1	108119	77514.9	77878.5	91177.2	-0.0347346	-0.126764	0.114145	-0.216106	0	-0.0857429	0.30896	0.361793	0.409235	RPS17	Homo sapiens ribosomal protein S17 (RPS17), mRNA [NM_001021]	82823302	chr15	82822735	-	FALSE	hs|15q25.2	6218	NM_001021	ribosomal protein S17	chr15:82823302-82822735	GO:0010467|GO:0003735|GO:0019083|GO:0006364|GO:0019058|GO:0034101|GO:0006415|GO:0006412|GO:0006413|GO:0005829|GO:0006414|GO:0005622|GO:0022627|GO:0031018|GO:0005840|GO:0016032|GO:0042274|GO:0044267|GO:0000028	NM_001021	Hs.433427
A_23_P145114	0.0066156	1.03176	0.0451097	1.03176	up	2.14814	1.10309	2.14814	up	2.08201	1.05798	2.08201	up	458.37	464.68	712.078	712.079	622.031	829.152	759.94	411.491	487.887	-0.134847	0.108007	0.419132	0	0.0410203	0.215943	-1.20823	-0.482639	-1.22611	GCLC	Homo sapiens glutamate-cysteine ligase, catalytic subunit (GCLC), transcript variant 1, mRNA [NM_001498]	53362256	chr6	53362197	-	FALSE	hs|6p12.1	2729	NM_001498	glutamate-cysteine ligase, catalytic subunit	chr6:53362256-53362197	GO:0050662|GO:0046685|GO:0006805|GO:0009408|GO:0006534|GO:0016874|GO:0032436|GO:0051409|GO:0005829|GO:0005737|GO:0043524|GO:0051900|GO:0050880|GO:0000166|GO:0004357|GO:0006750|GO:0009725|GO:0031397|GO:0009410|GO:0006979|GO:0000287|GO:0046982|GO:0006536|GO:0006916|GO:0005524|GO:0019852|GO:0043531|GO:0017109|GO:0045454|GO:0016595|GO:0045892	NM_001498	Hs.654465
A_23_P216894	0.00908505	1.04994	0.0703075	1.04994	up	-1.51134	-0.595831	1.51134	down	-1.58682	-0.666139	1.58682	down	376.891	335.831	590.857	192.018	428.289	802.743	597.085	475.931	570.384	-0.134756	0	-0.0854473	0.134224	-0.251801	-0.313549	0.419703	0.388028	0.75956	MAPKAP1	Homo sapiens mitogen-activated protein kinase associated protein 1 (MAPKAP1), transcript variant 1, mRNA [NM_001006617]	128200623	chr9	128200564	-	FALSE	hs|9q33.3	79109	NM_001006617	mitogen-activated protein kinase associated protein 1	chr9:128200623-128200564	GO:0008150|GO:0048011|GO:0005886|GO:0048015|GO:0031295|GO:0006950|GO:0016023|GO:0005634|GO:0017016|GO:0005829	NM_001006617	Hs.495138
A_24_P36847	0.00338899	-1.01728	-0.0247212	1.01728	down	-1.4791	-0.56472	1.4791	down	-1.45397	-0.539999	1.45397	down	1621.67	2279.59	3330.39	1852.15	2483.21	3315.64	2556.43	1875.26	2308.63	-0.0573112	-0.164907	-0.109055	0.0575094	0	-0.314618	0.382682	0.405609	0.574598	DHX9	Homo sapiens DEAH (Asp-Glu-Ala-His) box polypeptide 9 (DHX9), transcript variant 1, mRNA [NM_001357]	182856315	chr1	182856256	+	FALSE	hs|1q25.3	1660	NM_001357	DEAH (Asp-Glu-Ala-His) box polypeptide 9	chr1:182856256-182856315	GO:0008380|GO:0003725|GO:0005515|GO:0010467|GO:0003724|GO:0005813|GO:0070934|GO:0005730|GO:0005634|GO:0003677|GO:0005524|GO:0004004|GO:0005622|GO:0005737|GO:0004003|GO:0016787|GO:0000166|GO:0000398|GO:0030529|GO:0005654|GO:0070937	NM_001357	Hs.191518
A_24_P942002	0.00404601	-1.05492	-0.0771279	1.05492	down	-1.72928	-0.790172	1.72928	down	-1.63926	-0.713044	1.63926	down	267.231	312.957	520.996	214.741	360.613	552.128	421.596	348.835	360.794	-0.29825	-0.460606	0.0699462	-0.160007	0	-0.29752	0.447067	0.570415	0.664122	ACAP2	Homo sapiens ArfGAP with coiled-coil, ankyrin repeat and PH domains 2 (ACAP2), mRNA [NM_012287]	194996507	chr3	194996448	-	FALSE	hs|3q29	23527	NM_012287	ArfGAP with coiled-coil, ankyrin repeat and PH domains 2	chr3:194996507-194996448	GO:0008060|GO:0032312|GO:0008270|GO:0046872	NM_012287	Hs.593373
DCP_22_2	0.00749993	-1.79526	-0.844191	1.79526	down	-1.03659	-0.0518481	1.03659	down	1.73188	0.792343	1.73188	up	4989.96	4531.02	5958.32	10375.6	8881.87	9540.72	5543.15	4413.58	5069.94	-0.157867	-0.28221	-0.12221	0.670243	0.933005	0.367036	-0.453155	0	0.0464115		Unknown					pos
A_23_P123539	0.000868142	1.00966	0.013872	1.00966	up	-1.25594	-0.328769	1.25594	down	-1.26808	-0.342641	1.26808	down	1062	1494.73	2186.29	1439.81	1821.14	2050.62	1569.09	1185.26	1242.74	0.0930785	-0.0753634	-0.0414069	0	-0.0134135	-0.0518943	0.277231	0.385242	0.300141	PPP2R2A	Homo sapiens protein phosphatase 2, regulatory subunit B, alpha (PPP2R2A), transcript variant 1, mRNA [NM_002717]	26228155	chr8	26228096	+	FALSE	hs|8p21.2	5520	NM_002717	protein phosphatase 2, regulatory subunit B, alpha	chr8:26228096-26228155	GO:0005515|GO:0007165|GO:0006470|GO:0008601|GO:0000159|GO:0043278|GO:0004722	NM_002717	Hs.146339
A_32_P43084	0.00122899	2.76713	1.46839	2.76713	up	-1.03011	-0.0428049	1.03011	down	-2.85046	-1.5112	2.85046	down	45.0421	43.0823	61.5587	60.1197	58.9447	48.6591	94.7502	45.719	57.7891	0.440706	0.218566	-0.338725	-1.13078	-1.5533	-1.40054	0	0.0180398	0.430922							FALSE
A_23_P85783	0.00105578	-1.32063	-0.401223	1.32063	down	1.03361	0.0476974	1.03361	up	1.36502	0.44892	1.36502	up	2560.67	3804.36	5389.29	4113.2	5573.81	5332.78	3069.15	3093.07	3092.7	-0.0998811	0.0655614	-0.0103751	0.293814	0.36686	0.498299	0	-0.105863	-0.0819244	PHGDH	Homo sapiens phosphoglycerate dehydrogenase (PHGDH), mRNA [NM_006623]	120285588	chr1	120285529	+	FALSE	hs|1p12	26227	NM_006623	phosphoglycerate dehydrogenase	chr1:120285529-120285588	GO:0010468|GO:0048037|GO:0021510|GO:0019530|GO:0008652|GO:0009055|GO:0022402|GO:0031175|GO:0004617|GO:0051287|GO:0021782|GO:0007420|GO:0021915|GO:0006544|GO:0016491|GO:0006564|GO:0006566|GO:0022008|GO:0006541|GO:0009448	NM_006623	Hs.487296
A_23_P12155	0.000344532	-8.88554	-3.15146	8.88554	down	-1.06598	-0.0921827	1.06598	down	8.33555	3.05928	8.33555	up	13.7748	10.2167	8.33625	872.709	914.969	967.605	42.031	6.35467	10.7996	0.558252	-0.36499	-1.03778	2.64653	2.97783	2.98549	-0.429196	0	-0.138778	CRCT1	Homo sapiens cysteine-rich C-terminal 1 (CRCT1), mRNA [NM_019060]	152488449	chr1	152488390	+	FALSE	hs|1q21.3	54544	NM_019060	cysteine-rich C-terminal 1	chr1:152488390-152488449		NM_019060	Hs.110196
A_24_P381164	0.00934752	-1.00419	-0.00602971	1.00419	down	-1.45298	-0.539019	1.45298	down	-1.44692	-0.532989	1.44692	down	1177.89	1268.2	1605.25	1276.31	1438.91	1922.81	1849.48	1399.31	2014.33	0	-0.0166579	-0.199616	0.0786227	-0.0576259	-0.219181	0.320361	0.378731	0.701692	TTC17	Homo sapiens tetratricopeptide repeat domain 17 (TTC17), mRNA [NM_018259]	43516095	chr11	43516036	+	FALSE	hs|11p11.2	55761	NM_018259	tetratricopeptide repeat domain 17	chr11:43516036-43516095	GO:0005488	NM_018259	Hs.191186
A_23_P432077	0.00824351	-1.17139	-0.22822	1.17139	down	-2.08311	-1.05874	2.08311	down	-1.77832	-0.830519	1.77832	down	113.187	81.682	164.88	129.969	138.461	182.036	903.289	122.358	156.359	-0.0496902	-0.550164	-0.0862488	-0.3085	0.307058	0	1.09047	0.588716	0.810934	KIAA0564	Homo sapiens KIAA0564 (KIAA0564), transcript variant 1, mRNA [NM_015058]	42141855	chr13	42141796	-	FALSE	hs|13q14.11	23078	NM_015058	KIAA0564	chr13:42141855-42141796	GO:0005739|GO:0000166|GO:0005576|GO:0016887|GO:0005524	NM_015058	Hs.368282
A_32_P147063	0.00471685	-1.49805	-0.583082	1.49805	down	-1.46927	-0.555103	1.46927	down	1.01958	0.0279788	1.01958	up	179.85	170.144	286.213	344.003	306.761	384.778	514.038	208.441	287.393	-0.639007	-0.680274	-0.236694	0.117073	0	0.0761976	0.0520705	-0.0114905	0.0687542		Homo sapiens EST from clone 208499, full insert. [AL355688]	43720661	chr21	43720602	+	FALSE	hs|21q22.3		AL355688		chr21:43720602-43720661			Hs.655029
A_32_P184727	0.00693339	-1.11365	-0.155302	1.11365	down	-1.41949	-0.505371	1.41949	down	-1.27462	-0.350069	1.27462	down	17380.7	16551.5	22600.4	20971.1	19276.2	27388.4	28937.9	19336.1	26844.5	-0.103925	-0.320778	0	-0.0716495	-0.00322708	0.116079	0.471832	0.256878	0.362701	KPNB1	Homo sapiens karyopherin (importin) beta 1 (KPNB1), mRNA [NM_002265]	45760432	chr17	45760373	+	FALSE	hs|17q21.32	3837	NM_002265	karyopherin (importin) beta 1	chr17:45760373-45760432	GO:0005515|GO:0019904|GO:0019058|GO:0006915|GO:0005634|GO:0006606|GO:0006607|GO:0006921|GO:0005829|GO:0005737|GO:0046796|GO:0006610|GO:0005643|GO:0006309|GO:0044419|GO:0008565|GO:0016032|GO:0008270|GO:0008139|GO:0005654|GO:0000060	NM_002265	Hs.532793
A_23_P1676	0.00102165	-1.04101	-0.0579901	1.04101	down	-1.54085	-0.623726	1.54085	down	-1.48014	-0.565736	1.48014	down	1311.78	1357.58	1899.45	1234.15	1387.72	2271.36	2542.83	1637.22	2017.28	-0.234771	-0.186314	0	0.000115454	-0.110564	-0.136665	0.621811	0.344254	0.484029	TMEM218	Homo sapiens transmembrane protein 218 (TMEM218), mRNA [NM_001080546]	124967267	chr11	124967208	-	FALSE	hs|11q24.2	219854	NM_001080546	transmembrane protein 218	chr11:124967267-124967208	GO:0016020|GO:0016021	NM_001080546	Hs.7626
A_24_P105191	0.00392701	1.09848	0.135503	1.09848	up	-2.99721	-1.58362	2.99721	down	-3.29236	-1.71912	3.29236	down	248.652	261.058	318.971	284.816	226.237	450.684	726.996	440.019	386.794	0.170176	-0.282329	-0.290946	0	-0.782309	-0.0272989	1.29571	2.00458	1.04746	HS6ST2	Homo sapiens heparan sulfate 6-O-sulfotransferase 2 (HS6ST2), transcript variant L, mRNA [NM_001077188]	131760147	chrX	131760088	-	FALSE	hs|Xq26.2	90161	NM_001077188	heparan sulfate 6-O-sulfotransferase 2	chrX:131760147-131760088	GO:0016020|GO:0008146|GO:0016021|GO:0016740	NM_001077188	Hs.385956
A_32_P41127	0.00767107	-1.11033	-0.150991	1.11033	down	1.4229	0.508835	1.4229	up	1.57989	0.659826	1.57989	up	584.753	410.731	869.545	1112.1	835.277	787.442	1023.41	578.643	767.028	0	-0.174939	0.0820407	0.202204	0.0279836	0.129888	-0.790424	-0.287665	-0.541314	PFDN1	Homo sapiens prefoldin subunit 1 (PFDN1), mRNA [NM_002622]	139680145	chr5	139680086	-	FALSE	hs|5q31.3	5201	NM_002622	prefoldin subunit 1	chr5:139680145-139680086	GO:0005515|GO:0007049|GO:0006355|GO:0003700|GO:0006457|GO:0016272|GO:0051084|GO:0051082|GO:0044267|GO:0006351	NM_002622	Hs.483564
A_23_P37983	6.2969e-05	-2.95821	-1.56472	2.95821	down	1.15047	0.202227	1.15047	up	3.40334	1.76695	3.40334	up	5715.93	7704.42	10502.6	13937.3	12970.3	9690.06	7789.99	6566.01	6901.66	0.175681	0	-0.13914	1.30722	1.52525	1.89824	-0.241863	-0.160036	-0.168241	MT1B	Homo sapiens metallothionein 1B (MT1B), mRNA [NM_005947]	56687007	chr16	56686948	+	FALSE	hs|16q12.2	4490	NM_005947	metallothionein 1B	chr16:56686948-56687007	GO:0008150|GO:0005737|GO:0005507|GO:0008270|GO:0046870|GO:0046872	NM_005947	Hs.656629
A_24_P56052	0.00483317	-1.14987	-0.201465	1.14987	down	-1.49785	-0.582893	1.49785	down	-1.30263	-0.381429	1.30263	down	905.91	645.034	1033.63	747.348	957.014	1398.05	1371.13	1018.66	1186.87	0	-0.360476	-0.280543	-0.0556506	-0.0911875	0.110213	0.459139	0.318029	0.330493	ZFP91	Homo sapiens zinc finger protein 91 homolog (mouse) (ZFP91), transcript variant 1, mRNA [NM_053023]	58384731	chr11	58384672	+	FALSE	hs|11q12.1	80829	NM_053023	zinc finger protein 91 homolog (mouse)	chr11:58384672-58384731	GO:0005622|GO:0070534|GO:0004842|GO:0007250|GO:0016874|GO:0005730|GO:0008270|GO:0005634|GO:0003676|GO:0046872|GO:0043231	NM_053023	Hs.524920
A_23_P45831	0.004516	-1.1346	-0.182179	1.1346	down	-1.57842	-0.658477	1.57842	down	-1.39117	-0.476297	1.39117	down	1499.86	1704.64	2746.97	1628.15	2152.43	2981.97	2146.54	1590.87	2045	-0.0572672	-0.415564	-0.0302391	0	0.0664158	-0.0229481	0.560646	0.327014	0.5847	CHD1L	Homo sapiens chromodomain helicase DNA binding protein 1-like (CHD1L), mRNA [NM_004284]	146766170	chr1	146766111	+	FALSE	hs|1q21.1	9557	NM_004284	chromodomain helicase DNA binding protein 1-like	chr1:146766111-146766170	GO:0005515|GO:0005886|GO:0006200|GO:0004386|GO:0005730|GO:0005634|GO:0003677|GO:0005524|GO:0006974|GO:0005737|GO:0004003|GO:0006281|GO:0016787|GO:0000166|GO:0006338|GO:0016887	NM_004284	Hs.191164
A_24_P878419	0.00984078	1.13152	0.178257	1.13152	up	1.50945	0.594022	1.50945	up	1.33401	0.415765	1.33401	up	564.158	613.296	790.985	927.925	714.184	857.263	969.794	537.326	727.492	0.0642472	0.310504	0.141514	0.15614	-0.174645	0	-0.571378	-0.220597	-0.473826			112210745	chr10	112210686	+	FALSE	hs|10q25.2				chr10:112210686-112210745
A_23_P37484	0.000781874	1.09149	0.126302	1.09149	up	-1.2688	-0.34346	1.2688	down	-1.38488	-0.469762	1.38488	down	3073.95	3440.25	4557.62	4350.71	3877.05	5153.89	5862.75	3559.02	4920.01	-0.119816	0.0431336	0	-0.217871	-0.18399	-0.0537264	0.304297	0.268008	0.381393	CHSY1	Homo sapiens chondroitin sulfate synthase 1 (CHSY1), mRNA [NM_014918]	101716122	chr15	101716063	-	FALSE	hs|15q26.3	22856	NM_014918	chondroitin sulfate synthase 1	chr15:101716122-101716063	GO:0030206|GO:0005794|GO:0016758|GO:0016020|GO:0032580|GO:0031667|GO:0016021|GO:0050510|GO:0047238|GO:0046872|GO:0016740	NM_014918	Hs.110488
A_23_P82316	0.00152028	-1.13292	-0.180047	1.13292	down	1.10884	0.149056	1.10884	up	1.25623	0.329103	1.25623	up	493.314	456.027	788.651	769.15	793.358	818.383	1068.3	545.487	653.411	0.00659366	-0.0466757	0	0.165899	0.110332	0.223827	-0.0853034	-0.246374	-0.155573	PRKRIP1	Homo sapiens PRKR interacting protein 1 (IL11 inducible) (PRKRIP1), mRNA [NM_024653]	102038123	chr7	102036982	+	FALSE	hs|7q22.1	79706	NM_024653	PRKR interacting protein 1 (IL11 inducible)	chr7:102036982-102038123	GO:0042326|GO:0003725|GO:0019901|GO:0005730|GO:0004860|GO:0005634|GO:0006469	NM_024653	Hs.406395
A_24_P289420	0.00961836	1.03095	0.0439806	1.03095	up	-1.31209	-0.391862	1.31209	down	-1.3527	-0.435843	1.3527	down	576.883	701.923	1268.91	739.973	1003.35	1067.11	1449.02	733.164	881.174	-0.147501	-0.205567	0.0277069	-0.161139	0	-0.296165	0.350426	0.330852	0.168947	FAM21C	Homo sapiens family with sequence similarity 21, member C (FAM21C), transcript variant 1, mRNA [NM_015262]	46287716	chr10	46285930	+	FALSE	hs|10q11.22	253725	NM_015262	family with sequence similarity 21, member C	chr10:46285930-46287716	GO:0005515|GO:0005886|GO:0031901|GO:0071203|GO:0006810|GO:0042147|GO:0005769	NM_015262	Hs.365286
A_23_P349127	0.00984936	-1.31577	-0.395911	1.31577	down	1.68672	0.754219	1.68672	up	2.21934	1.15013	2.21934	up	75.3845	97.1503	165.78	152.615	181.328	125.819	152.528	83.002	72.3669	0	-0.301628	0.180897	0.219993	0.263864	0.583145	-0.639212	-0.468786	-1.27539	CDAN1	Homo sapiens congenital dyserythropoietic anemia, type I (CDAN1), mRNA [NM_138477]	43016300	chr15	43016241	-	FALSE	hs|15q15.2	146059	NM_138477	congenital dyserythropoietic anemia, type I	chr15:43016300-43016241	GO:0005515|GO:0016020|GO:0016021	NM_138477	Hs.599232
A_32_P96776	0.00834694	1.0351	0.0497643	1.0351	up	1.2872	0.364236	1.2872	up	1.24356	0.314472	1.24356	up	2965.57	3369.75	4381.15	4929.07	4156.48	4644.45	3863.84	2699.23	3434.39	0.0435418	0.145628	0.0545948	-0.080616	0	0.175088	-0.380449	-0.18501	-0.283484	C3orf78	chromosome 3 open reading frame 78 [Source:HGNC Symbol;Acc:37257] [ENST00000482728]	52574494	chr3	52568889	+	FALSE	hs|3p21.1	440957	CD389391	chromosome 3 open reading frame 78	chr3:52568889-52574494	GO:0005739|GO:0016020|GO:0016021		Hs.653020
A_24_P374652	0.00313766	1.07856	0.109108	1.07856	up	-1.25712	-0.330125	1.25712	down	-1.35588	-0.439234	1.35588	down	1283.04	924.845	1982.37	1518.9	1766.64	2071.55	2085.3	1603.13	2072.79	0.0723171	0	-0.0806893	-0.138012	-0.133909	-0.0637761	0.227603	0.268338	0.486063	NUCKS1	Homo sapiens nuclear casein kinase and cyclin-dependent kinase substrate 1 (NUCKS1), mRNA [NM_022731]	205687212	chr1	205687153	-	FALSE	hs|1q32.1	64710	NM_022731	nuclear casein kinase and cyclin-dependent kinase substrate 1	chr1:205687212-205687153	GO:0005634	NM_022731	Hs.213061
A_24_P557351	0.00982348	-2.54929	-1.35009	2.54929	down	1.38	0.464666	1.38	up	3.51801	1.81476	3.51801	up	22.9226	21.4294	37.9797	37.9237	44.0573	52.7485	26.669	22.1118	20.9654	0	-0.800613	0.329894	1.71512	1.35904	0.505406	-0.575024	-0.622417	-0.667277		Homo sapiens, clone IMAGE:3344449, mRNA. [BC025324]	25639194	chr2	25639135	-	FALSE	hs|2p23.3		BC025324		chr2:25639194-25639135			Hs.675510
A_24_P24972	0.00743847	-1.02344	-0.0334246	1.02344	down	1.56241	0.643771	1.56241	up	1.59903	0.677196	1.59903	up	1870.36	2251.95	4972.09	4718.44	4715.61	4226.92	2216.88	1651.33	2337.08	0	0.189482	0.12933	0.262421	0.166163	-0.00949782	-0.805609	-0.249438	-0.557453		ribosomal protein L22 pseudogene 11 [Source:HGNC Symbol;Acc:35603] [ENST00000538228]	111391880	chr2	111391821	+	FALSE	hs|2q13		CR590757		chr2:111391821-111391880			Hs.730931
A_23_P414273	0.0097748	-1.40499	-0.490562	1.40499	down	1.40146	0.486935	1.40146	up	1.96905	0.977497	1.96905	up	2040.67	1832.64	2895.08	2679.56	2787.64	4100.26	2559.21	1870.75	2425.64	-0.137952	0	0.261893	0.20082	0.556718	0.83809	-0.707334	-0.297848	-0.331681	C5orf62	Homo sapiens chromosome 5 open reading frame 62 (C5orf62), mRNA [NM_032947]	150176249	chr5	150176190	+	FALSE	hs|5q33.1	85027	NM_032947	chromosome 5 open reading frame 62	chr5:150176190-150176249	GO:0016020|GO:0016021	NM_032947	Hs.29444
A_23_P79931	0.00618536	-1.30629	-0.38547	1.30629	down	-1.7095	-0.773578	1.7095	down	-1.30868	-0.388108	1.30868	down	445.212	531.783	846.409	439.216	638.47	991.122	794.206	691.002	566.678	-0.673829	-0.419483	-0.0611096	0.0662526	0	-0.0642644	0.400865	0.424961	0.340487	ATRN	Homo sapiens attractin (ATRN), transcript variant 2, mRNA [NM_139322]	3581634	chr20	3578630	+	FALSE	hs|20p13	8455	NM_139322	attractin	chr20:3578630-3581634	GO:0005737|GO:0006954|GO:0005886|GO:0005887|GO:0005488|GO:0040014|GO:0005529|GO:0005576|GO:0004872|GO:0006979|GO:0005615	NM_139322	Hs.276252
A_24_P179903	0.00937929	1.08311	0.115177	1.08311	up	-1.34693	-0.42968	1.34693	down	-1.45888	-0.544856	1.45888	down	5223.3	5148.86	8067.63	6453.88	6183.53	7056.01	8009.89	5392.01	6984.16	0	-0.30323	0.0269089	-0.229672	-0.203417	-0.188762	0.521199	0.163401	0.328118	AK2	Homo sapiens adenylate kinase 2 (AK2), nuclear gene encoding mitochondrial protein, transcript variant 1, mRNA [NM_001625]	33478726	chr1	33478667	-	FALSE	hs|1p35.1	204	NM_001625	adenylate kinase 2	chr1:33478726-33478667	GO:0005739|GO:0005758|GO:0015949|GO:0000166|GO:0005743|GO:0055086|GO:0004017|GO:0005524|GO:0016740	NM_001625	Hs.470907
A_23_P19702	0.00966692	1.037	0.0524112	1.037	up	-1.32907	-0.410421	1.32907	down	-1.37825	-0.462832	1.37825	down	2080.84	1966.13	2944.63	2384.69	2299.85	3271.4	3510.79	2331.36	3088.76	0.00687122	-0.370403	0	-0.205156	-0.111039	-0.204571	0.249433	0.271172	0.347127	TAB2	Homo sapiens TGF-beta activated kinase 1/MAP3K7 binding protein 2 (TAB2), mRNA [NM_015093]	149732624	chr6	149732565	+	FALSE	hs|6q25.1	23118	NM_015093	TGF-beta activated kinase 1/MAP3K7 binding protein 2	chr6:149732565-149732624	GO:0005515|GO:0050852|GO:0034142|GO:0005886|GO:0007249|GO:0051403|GO:0046872|GO:0005829|GO:0007507|GO:0005622|GO:0002756|GO:0000187|GO:0005737|GO:0051092|GO:0002755|GO:0045860|GO:0043123|GO:0034138|GO:0070530|GO:0034130|GO:0034134|GO:0007254|GO:0002224|GO:0008063|GO:0045087|GO:0008270|GO:0010008	NM_015093	Hs.269775
A_24_P115774	0.00794879	-1.04522	-0.0638085	1.04522	down	-1.46722	-0.553089	1.46722	down	-1.40374	-0.48928	1.40374	down	982.877	993.704	1516.74	963.076	1210.73	1668.38	1425.74	1083.24	1239.28	-0.0147078	-0.345466	-0.0489694	0	0.060953	-0.27867	0.458361	0.359548	0.432214	BIRC2	Homo sapiens baculoviral IAP repeat containing 2 (BIRC2), mRNA [NM_001166]	102248450	chr11	102248391	+	FALSE	hs|11q22.2	329	NM_001166	baculoviral IAP repeat containing 2	chr11:102248391-102248450	GO:0000209|GO:0005515|GO:0035631|GO:0004842|GO:0006915|GO:0042981|GO:0001890|GO:0046872|GO:0006921|GO:0005829|GO:0005622|GO:0005737|GO:0047485|GO:0009898|GO:0043161|GO:0008270|GO:0043123|GO:0007166	NM_001166	Hs.696238
A_32_P81357	0.0042961	-1.16117	-0.215575	1.16117	down	1.13011	0.176466	1.13011	up	1.31225	0.392042	1.31225	up	1087.25	1528.72	2297.16	1533.79	1987.91	2076.38	1402.2	1324.01	1258.25	0	-0.162681	0.0730534	0.11559	0.190172	0.251336	-0.140408	-0.23671	-0.241909	FAHD2A	Homo sapiens fumarylacetoacetate hydrolase domain containing 2A (FAHD2A), mRNA [NM_016044]	96078430	chr2	96078237	+	FALSE	hs|2q11.1	51011	NM_016044	fumarylacetoacetate hydrolase domain containing 2A	chr2:96078237-96078430	GO:0016787|GO:0046872	NM_016044	Hs.546387
A_23_P40657	0.00233833	-1.13141	-0.178124	1.13141	down	2.13504	1.09426	2.13504	up	2.41561	1.27239	2.41561	up	56.7843	107.51	133.242	102.837	122.33	100.568	71.495	70.9671	60.5816	0.0123671	0.125133	-0.062653	0.0557779	0	0.55344	-0.865889	-1.46279	-0.879265	GCAT	Homo sapiens glycine C-acetyltransferase (GCAT), nuclear gene encoding mitochondrial protein, transcript variant 2, mRNA [NM_014291]	38212597	chr22	38212293	+	FALSE	hs|22q13.1	23464	NM_014291	glycine C-acetyltransferase	chr22:38212293-38212597	GO:0005739|GO:0006520|GO:0009058|GO:0008890|GO:0016769|GO:0030170|GO:0005743|GO:0008415	NM_014291	Hs.54609
A_32_P8221	0.00333128	-1.11247	-0.153763	1.11247	down	3.42279	1.77517	3.42279	up	3.80774	1.92894	3.80774	up	25.1982	55.1279	79.7697	66.7367	47.7117	68.0731	50.7062	13.6154	18.8748	-0.57553	0.405178	0.367746	0.427016	0	0.231666	-1.1414	-2.08755	-1.89917	GRM8	Homo sapiens glutamate receptor, metabotropic 8 (GRM8), transcript variant 1, mRNA [NM_000845]	126078791	chr7	126078732	-	FALSE	hs|7q31.33	2918	NM_000845	glutamate receptor, metabotropic 8	chr7:126078791-126078732	GO:0043005|GO:0007608|GO:0005886|GO:0004930|GO:0030818|GO:0001642|GO:0035249|GO:0046928|GO:0007194|GO:0042734|GO:0007186|GO:0005887|GO:0008066|GO:0043025|GO:0004872|GO:0007601|GO:0050896	NM_000845	Hs.449625
A_23_P91930	0.00500013	-1.05129	-0.072154	1.05129	down	-1.38303	-0.467836	1.38303	down	-1.31556	-0.395682	1.31556	down	825.911	815.832	1229.38	945.846	927.417	1590.57	1475.8	873.613	1160.61	-0.118184	-0.284608	0.0331706	0	-0.0898371	-0.0633222	0.252416	0.316676	0.464796	QTRTD1	Homo sapiens queuine tRNA-ribosyltransferase domain containing 1 (QTRTD1), mRNA [NM_024638]	113807045	chr3	113806986	+	FALSE	hs|3q13.31	79691	NM_024638	queuine tRNA-ribosyltransferase domain containing 1	chr3:113806986-113807045	GO:0005739|GO:0005737|GO:0016757|GO:0046872|GO:0008479|GO:0008616	NM_024638	Hs.477162
A_23_P6119	0.00605513	1.09484	0.130721	1.09484	up	-1.40184	-0.487317	1.40184	down	-1.53479	-0.618039	1.53479	down	849.403	666.721	1120.78	451.119	697.349	1505.66	1143.93	914.507	786.541	0.153805	-0.234143	-0.0116071	0	-0.313422	-0.170688	0.465698	0.543573	0.360735	SEC23B	Homo sapiens Sec23 homolog B (S. cerevisiae) (SEC23B), transcript variant 2, mRNA [NM_032985]	18529277	chr20	18526643	+	FALSE	hs|20p11.23	10483	NM_032985	Sec23 homolog B (S. cerevisiae)	chr20:18526643-18529277	GO:0048471|GO:0005794|GO:0030127|GO:0005783|GO:0006886|GO:0043231|GO:0006888|GO:0000139|GO:0016020|GO:0033116|GO:0005789|GO:0008270|GO:0016192	NM_032985	Hs.369373
A_23_P165636	0.000617609	-1.38379	-0.468626	1.38379	down	1.15623	0.209434	1.15623	up	1.59999	0.67806	1.59999	up	1847.06	2078.83	3553.87	3611.26	3661.59	3015.71	2452.56	2064.52	2186.3	-0.189523	0	0.0966425	0.351553	0.475946	0.485499	-0.272514	-0.302517	-0.146151	CAPG	Homo sapiens capping protein (actin filament), gelsolin-like (CAPG), mRNA [NM_001747]	85621968	chr2	85621909	-	FALSE	hs|2p11.2	822	NM_001747	capping protein (actin filament), gelsolin-like	chr2:85621968-85621909	GO:0042470|GO:0051016|GO:0031965|GO:0005737|GO:0006461|GO:0030031|GO:0005730|GO:0008290|GO:0005634|GO:0003779	NM_001747	Hs.516155
A_24_P677783	0.00256423	-1.02178	-0.0310831	1.02178	down	-1.5112	-0.595694	1.5112	down	-1.47899	-0.564611	1.47899	down	2320.35	2137.5	3866.41	1948.24	3217.63	3590.62	2788.05	2536.5	2542.34	0	-0.141602	-0.0596046	0.0445089	-0.0183936	-0.134073	0.744379	0.493666	0.347831		Homo sapiens hypothetical protein LOC152024, mRNA (cDNA clone IMAGE:4827576). [BC045572]	24138822	chr3	24138763	-	FALSE	hs|3p24.2		BC045572		chr3:24138822-24138763			Hs.385606
A_23_P167227	0.007553	-1.07457	-0.103761	1.07457	down	-1.49787	-0.582909	1.49787	down	-1.39392	-0.479148	1.39392	down	3471.74	3747.85	5630.37	4040.51	4366.05	6394.83	6049.65	4085.95	4750.6	-0.222856	-0.263364	0.0528947	-0.112932	0	-0.00911129	0.660845	0.314527	0.34003	HADH	Homo sapiens hydroxyacyl-CoA dehydrogenase (HADH), nuclear gene encoding mitochondrial protein, transcript variant 2, mRNA [NM_005327]	108956169	chr4	108956110	+	FALSE	hs|4q25	3033	NM_005327	hydroxyacyl-CoA dehydrogenase	chr4:108956110-108956169	GO:0050662|GO:0014823|GO:0032868|GO:0006635|GO:0042493|GO:0005743|GO:0070403|GO:0003857|GO:0005739|GO:0005737|GO:0005488|GO:0005759|GO:0006631|GO:0016491|GO:0009725|GO:0046676|GO:0044255	NM_005327	Hs.438289
A_32_P169316	0.000799468	-1.07914	-0.109885	1.07914	down	-1.71972	-0.782174	1.71972	down	-1.5936	-0.672289	1.5936	down	154.995	148.413	237.031	174.994	210.694	274.767	587.431	195.39	267.116	-0.120044	-0.29266	-0.0214176	0.0299212	-0.134389	0	0.801089	0.463757	0.647554			176498023	chr5	176497964	+	FALSE	hs|5q35.2				chr5:176497964-176498023
A_32_P35759	0.00107692	-1.08485	-0.117497	1.08485	down	1.76222	0.817391	1.76222	up	1.91174	0.934889	1.91174	up	125.915	162.018	481.771	369.339	462.252	330.546	304.204	90.2555	109.348	-0.224212	0.0842022	0.269659	0.308295	0.173847	0	-0.809009	-0.714184	-0.799332		BX118285 Soares_testis_NHT Homo sapiens cDNA clone IMAGp998G173521, mRNA sequence [BX118285]	129648612	chr11	129648553	-	FALSE	hs|11q24.3		BX118285		chr11:129648612-129648553			Hs.124007
A_23_P2114	0.00897875	1.10553	0.144734	1.10553	up	1.41157	0.497298	1.41157	up	1.27683	0.352564	1.27683	up	752.319	1067.68	1400.18	976.15	1239.36	1138.65	868.526	549.338	651.049	0.376119	0.282849	-0.0302801	0.0700512	0.124436	0	-0.298036	-0.32959	-0.235579	LAMTOR1	Homo sapiens late endosomal/lysosomal adaptor, MAPK and MTOR activator 1 (LAMTOR1), mRNA [NM_017907]	71808801	chr11	71808742	-	FALSE	hs|11q13.4	55004	NM_017907	late endosomal/lysosomal adaptor, MAPK and MTOR activator 1	chr11:71808801-71808742	GO:0042632|GO:0032418|GO:0005515|GO:0032008|GO:0005794|GO:0005886|GO:0032439|GO:0010872|GO:0005765|GO:0005764|GO:0043231|GO:0010874|GO:0071986|GO:0001919|GO:0071230|GO:0031902|GO:0016049|GO:0045121|GO:0007032|GO:0034613|GO:0060620|GO:0043410|GO:0007040|GO:0005768	NM_017907	Hs.530753
A_24_P91140	0.00872406	-1.03404	-0.0482854	1.03404	down	-1.31376	-0.393702	1.31376	down	-1.27052	-0.345417	1.27052	down	4342.75	4637.98	6517.4	5212.8	5595.83	7450.89	6576.75	4787.71	5485.25	-0.010537	-0.0989647	-0.0949583	0.0482482	-0.107852	0	0.494403	0.315898	0.166346	RPL23A	Homo sapiens ribosomal protein L23a (RPL23A), mRNA [NM_000984]	27051147	chr17	27051088	+	FALSE	hs|17q11.2	6147	NM_000984	ribosomal protein L23a	chr17:27051088-27051147	GO:0005515|GO:0010467|GO:0003735|GO:0008283|GO:0019083|GO:0019058|GO:0005634|GO:0019843|GO:0006415|GO:0006412|GO:0005829|GO:0006414|GO:0005622|GO:0000166|GO:0031018|GO:0005840|GO:0016032|GO:0031932|GO:0022625|GO:0044267	NM_000984	Hs.419463
A_24_P62469	0.00640854	-1.07144	-0.099548	1.07144	down	1.48666	0.572076	1.48666	up	1.59286	0.671624	1.59286	up	186.729	220.095	357.808	378.874	396.161	330.54	322.549	149.411	158.625	-0.0437437	0.0958317	0	0.0916944	0.0387557	0.220282	-0.872598	-0.378203	-0.413339	PLCH2	Homo sapiens phospholipase C, eta 2 (PLCH2), mRNA [NM_014638]	2436854	chr1	2436795	+	FALSE	hs|1p36.32	9651	NM_014638	phospholipase C, eta 2	chr1:2436795-2436854	GO:0035556|GO:0016042|GO:0008150|GO:0003674|GO:0005737|GO:0016787|GO:0005886|GO:0004435|GO:0005509|GO:0005575|GO:0004871	NM_014638	Hs.170156
A_24_P117803	0.00986426	1.16002	0.214154	1.16002	up	1.44226	0.528336	1.44226	up	1.24331	0.314183	1.24331	up	346.06	832.112	1252.84	1154.75	1176.27	698.41	542.078	308.981	362.108	0.173195	0.193652	0.174787	0.115725	0	-0.216552	-0.489459	-0.396161	-0.157755		GB	114433176	chrX	114433117	+	FALSE	hs|Xq23				chrX:114433117-114433176
A_23_P48495	0.00986809	-1.74054	-0.799536	1.74054	down	1.42528	0.511243	1.42528	up	2.48076	1.31078	2.48076	up	64.4868	79.4152	137.249	154.329	138.849	144.007	137.9	65.222	90.946	0	-0.233839	0.863527	1.11298	0.984961	0.930353	-0.186491	-0.427812	-0.289739	TCL1B	Homo sapiens T-cell leukemia/lymphoma 1B (TCL1B), transcript variant 1, mRNA [NM_004918]	96158926	chr14	96158867	+	FALSE	hs|14q32.13	9623	NM_004918	T-cell leukemia/lymphoma 1B	chr14:96158867-96158926		NM_004918	Hs.632346
A_24_P194748	0.00285221	-2.05353	-1.0381	2.05353	down	2.47477	1.30729	2.47477	up	5.08201	2.3454	5.08201	up	53.3751	53.6375	211.815	143.976	186.127	175.159	84.3159	57.9585	53.5913	-0.26302	0	1.12048	1.03619	1.3533	1.58228	-0.752508	-1.03136	-1.28056	ZNF275	Homo sapiens zinc finger protein 275 (ZNF275), mRNA [NM_001080485]	152613857	chrX	152613798	+	FALSE	hs|Xq28	10838	NM_001080485	zinc finger protein 275	chrX:152613798-152613857	GO:0005622|GO:0006355|GO:0008270|GO:0005634|GO:0003677|GO:0046872	NM_001080485	Hs.348963
A_23_P349928	0.00301631	1.07465	0.103873	1.07465	up	-1.26178	-0.335461	1.26178	down	-1.35598	-0.439335	1.35598	down	28871	24329.1	30749.1	37006	30527.4	36846.9	45434.7	29359.6	43116.4	0.0872976	0	-0.171622	-0.0681313	-0.188697	-0.139116	0.256869	0.271139	0.394051	SP100	Homo sapiens SP100 nuclear antigen (SP100), transcript variant 2, mRNA [NM_003113]	231380696	chr2	231380490	+	FALSE	hs|2q37.1	6672	NM_003113	SP100 nuclear antigen	chr2:231380490-231380696	GO:0005515|GO:0070087|GO:0019221|GO:0005634|GO:0042803|GO:0043433|GO:0042802|GO:0051091|GO:0005737|GO:0060337|GO:0044419|GO:0034340|GO:0032526|GO:0034341|GO:0019900|GO:0006978|GO:0034097|GO:0060333|GO:0003714|GO:0019904|GO:0003713|GO:0005730|GO:0032897|GO:0000122|GO:0043392|GO:0048384|GO:0034399|GO:0016605|GO:0051271|GO:0045893|GO:0045892|GO:0008134	NM_003113	Hs.369056
A_24_P118862	0.00920018	-1.2337	-0.302989	1.2337	down	-1.7304	-0.791105	1.7304	down	-1.40261	-0.488116	1.40261	down	3240.92	1260.36	2485.72	1510.25	2026.28	5317.04	4227.44	3361.73	3096.45	-0.259438	-0.384421	-0.319759	0.22159	0	-0.276242	0.657997	0.560369	0.19133	ZNF678	Homo sapiens zinc finger protein 678 (ZNF678), transcript variant 1, mRNA [NM_178549]	227842893	chr1	227842834	+	FALSE	hs|1q42.13	339500	NM_178549	zinc finger protein 678	chr1:227842834-227842893	GO:0005622|GO:0006355|GO:0008270|GO:0005634|GO:0003677|GO:0046872	NM_178549	Hs.30323
A_32_P170749	0.00726559	-1.48494	-0.570401	1.48494	down	-1.2075	-0.272029	1.2075	down	1.22976	0.298372	1.22976	up	1068.89	1056.69	2011.14	1809.55	2016.83	2421.14	1786.75	1340.33	1574.42	-0.472403	-0.364408	-0.179564	0.365395	0.115129	0.214301	0	-0.23243	0.0321408	STAG3L2	Homo sapiens stromal antigen 3-like 2 (STAG3L2), mRNA [NM_001025202]	74303897	chr7	74303838	-	FALSE	hs|7q11.23	442582	NM_001025202	stromal antigen 3-like 2	chr7:74303897-74303838	GO:0005488|GO:0005634	NM_001025202	Hs.709564
A_24_P934755	0.00616045	-1.10708	-0.146754	1.10708	down	1.47956	0.565168	1.47956	up	1.63799	0.711922	1.63799	up	447.237	392.973	660.458	582.21	568.03	743.297	699.254	373.492	395.1	-0.0131294	0	0.299132	0.177675	0.271095	0.277495	-0.676388	-0.196746	-0.536367	LOC100507948	PREDICTED: Homo sapiens hypothetical LOC100507948, transcript variant 1 (LOC100507948), partial miscRNA [XR_112445]	233446114	chr2	233446055	+	FALSE	hs|2q37.1	100507948	XR_112445	hypothetical LOC100507948	chr2:233446055-233446114		XR_112445	Hs.292026
A_32_P39669	0.00875591	-1.89533	-0.922447	1.89533	down	1.36041	0.444037	1.36041	up	2.57842	1.36648	2.57842	up	101.43	224.229	306.431	271.628	327.414	348.832	160.371	123.081	134.968	0	-0.295445	0.633434	1.14971	1.07961	0.876007	-0.7522	-0.134616	-0.107308		Q5W0G2_HUMAN (Q5W0G2) Ankyrin repeat domain 18B, partial (11%) [THC2519054]	143196527	chr1	143194289	-	FALSE	hs|1q21.1				chr1:143196527-143194289
A_23_P323751	0.00106288	1.22807	0.296389	1.22807	up	-1.40725	-0.492882	1.40725	down	-1.7282	-0.789271	1.7282	down	1585.73	1491.56	1975.27	1388.13	1515.68	2489.95	2444.99	1709.97	2213.66	0.0954953	0	-0.118993	-0.419881	-0.410194	-0.0825881	0.431767	0.451229	0.572153	FAM83D	Homo sapiens family with sequence similarity 83, member D (FAM83D), mRNA [NM_030919]	37581385	chr20	37581326	+	FALSE	hs|20q11.23	81610	NM_030919	family with sequence similarity 83, member D	chr20:37581326-37581385	GO:0007067|GO:0007049|GO:0005737|GO:0000922|GO:0005856|GO:0051301	NM_030919	Hs.726442
A_23_P133345	0.00615885	-1.13628	-0.184323	1.13628	down	-1.3725	-0.456805	1.3725	down	-1.20788	-0.272482	1.20788	down	2127.94	2031.49	3548.43	2952.53	3246.84	3749.31	3520.59	2500.9	3609.99	-0.27965	-0.15256	-0.0816583	-0.0307549	0	0.0698548	0.192551	0.204096	0.4599	CLINT1	Homo sapiens clathrin interactor 1 (CLINT1), transcript variant 2, mRNA [NM_014666]	157214382	chr5	157214323	-	FALSE	hs|5q33.3	9685	NM_014666	clathrin interactor 1	chr5:157214382-157214323	GO:0005515|GO:0048471|GO:0005794|GO:0030136|GO:0006892|GO:0031410|GO:0005829|GO:0006897|GO:0008289|GO:0005737|GO:0016020|GO:0030276|GO:0016044	NM_014666	Hs.644000
A_24_P561165	0.00148563	-1.03671	-0.0520058	1.03671	down	1.83037	0.872133	1.83037	up	1.89755	0.924139	1.89755	up	110.286	91.2074	145.539	118.718	135.153	198.329	145.087	78.5107	101.148	0.144765	0	-0.0347295	0.088181	0.0951553	0.0827161	-0.821978	-1.15028	-0.534102			57381865	chr11	57381808	+	FALSE	hs|11q12.1				chr11:057381808-057381865
[truncated: 389 more rows]
